# Supplementary material
Source: HighWire-hosted journal article supplement (https://bmjopen.bmj.com/content/9/1/e021529)
Supplement: inline-supplementary-material-1 [file inline-supplementary-material-1.pdf]

|           |   |                                      |
|-----------|---|--------------------------------------|
| ccode     | 1 | Pingguo                              |
|           | 2 | Weishi                               |
|           | 3 | Wuchang                              |
|           | 4 | Qiaokou                              |
|           | 5 | Danyang                              |
|           | 6 | Minhang                              |
|           | 7 | Jiangyou                             |
|           | 8 | Dongchuan                            |
|           | 9 | Jiangshan                            |
| region    | 1 | Eastern-Danyang, Minhang, Jiangshan  |
|           | 2 | Central-Weishi, Wuchang, Qiaokou     |
|           | 3 | Western-Pingguo, Jiangyou, Dongchuan |
| agegroup  | 1 | <15                                  |
|           | 2 | 15-64                                |
|           | 3 | >=65                                 |
| sex       | 1 | male                                 |
|           | 2 | female                               |
| recosys   | 1 | from medical facilities              |
|           | 2 | from insurances                      |
|           | 3 | both                                 |
| tbtype    | 1 | PTB                                  |
|           | 2 | pleurisy                             |
| tbcatt    | 1 | new                                  |
|           | 2 | previously treated                   |
| tbclass2  | 1 | smear positive                       |
|           | 2 | smear negative/unknown               |
|           | 3 | pleurisy                             |
| reg6mo    | 1 | Not registered within 6 mon          |
|           | 0 | registered within 6 mon              |
| regdelayc | 1 | delay more than 7 days - yes         |
|           | 0 | delay more than 7 days - no          |

| ccode | county  | region | sno | age | agegp | sex | med | ins |
|-------|---------|--------|-----|-----|-------|-----|-----|-----|
| 1     | Pingguo | 3      | 1   | 52  | 2     | 2   | 1   | 1   |
| 1     | Pingguo | 3      | 2   | 74  | 3     | 2   |     | 1   |
| 1     | Pingguo | 3      | 3   | 33  | 2     | 2   |     | 1   |
| 1     | Pingguo | 3      | 4   | 23  | 2     | 1   | 1   | 1   |
| 1     | Pingguo | 3      | 5   | 21  | 2     | 1   | 1   |     |
| 1     | Pingguo | 3      | 6   | 84  | 3     | 2   | 1   |     |
| 1     | Pingguo | 3      | 7   | 45  | 2     | 1   | 1   | 1   |
| 1     | Pingguo | 3      | 8   | 28  | 2     | 1   | 1   | 1   |
| 1     | Pingguo | 3      | 9   | 62  | 2     | 2   |     | 1   |
| 1     | Pingguo | 3      | 10  | 26  | 2     | 1   | 1   |     |
| 1     | Pingguo | 3      | 11  | 45  | 2     | 2   | 1   |     |
| 1     | Pingguo | 3      | 12  | 57  | 2     | 1   | 1   | 1   |
| 1     | Pingguo | 3      | 13  | 51  | 2     | 1   | 1   | 1   |
| 1     | Pingguo | 3      | 14  | 76  | 3     | 2   | 1   |     |
| 1     | Pingguo | 3      | 15  | 47  | 2     | 2   |     | 1   |
| 1     | Pingguo | 3      | 16  | 72  | 3     | 1   |     | 1   |
| 1     | Pingguo | 3      | 17  | 35  | 2     | 1   | 1   | 1   |
| 1     | Pingguo | 3      | 18  | 25  | 2     | 1   |     | 1   |
| 1     | Pingguo | 3      | 19  | 39  | 2     | 2   | 1   |     |
| 1     | Pingguo | 3      | 20  | 39  | 2     | 1   | 1   | 1   |
| 1     | Pingguo | 3      | 21  | 40  | 2     | 2   | 1   | 1   |

|   |         |   |    |    |   |   |   |   |
|---|---------|---|----|----|---|---|---|---|
| 1 | Pingguo | 3 | 22 | 64 | 2 | 1 | 1 | 1 |
| 1 | Pingguo | 3 | 23 | 64 | 2 | 1 | 1 | 1 |
| 1 | Pingguo | 3 | 24 | 44 | 2 | 1 |   | 1 |
| 1 | Pingguo | 3 | 25 | 55 | 2 | 1 | 1 | 1 |
| 1 | Pingguo | 3 | 26 | 51 | 2 | 1 |   | 1 |
| 1 | Pingguo | 3 | 27 | 53 | 2 | 1 | 1 |   |
| 1 | Pingguo | 3 | 28 | 75 | 3 | 2 | 1 |   |
| 1 | Pingguo | 3 | 29 | 48 | 2 | 1 | 1 | 1 |
| 1 | Pingguo | 3 | 30 | 33 | 2 | 1 | 1 |   |
| 1 | Pingguo | 3 | 31 | 41 | 2 | 1 | 1 |   |
| 1 | Pingguo | 3 | 32 | 21 | 2 | 2 | 1 | 1 |
| 1 | Pingguo | 3 | 33 | 57 | 2 | 2 | 1 |   |
| 1 | Pingguo | 3 | 34 | 36 | 2 | 1 | 1 |   |
| 1 | Pingguo | 3 | 35 | 60 | 2 | 2 |   | 1 |
| 1 | Pingguo | 3 | 36 | 51 | 2 | 2 |   | 1 |
| 1 | Pingguo | 3 | 37 | 39 | 2 | 1 |   | 1 |
| 1 | Pingguo | 3 | 38 | 68 | 3 | 2 | 1 |   |
| 1 | Pingguo | 3 | 39 | 56 | 2 | 1 | 1 | 1 |
| 1 | Pingguo | 3 | 40 | 57 | 2 | 1 | 1 |   |
| 1 | Pingguo | 3 | 41 | 59 | 2 | 2 | 1 | 1 |
| 1 | Pingguo | 3 | 42 | 33 | 2 | 2 | 1 |   |
| 1 | Pingguo | 3 | 43 | 53 | 2 | 1 | 1 |   |
| 1 | Pingguo | 3 | 44 | 56 | 2 | 1 | 1 | 1 |
| 1 | Pingguo | 3 | 45 | 25 | 2 | 1 | 1 | 1 |
| 1 | Pingguo | 3 | 46 | 56 | 2 | 1 | 1 | 1 |
| 1 | Pingguo | 3 | 47 | 72 | 3 | 2 | 1 | 1 |
| 1 | Pingguo | 3 | 48 | 18 | 2 | 2 | 1 |   |
| 1 | Pingguo | 3 | 49 | 67 | 3 | 1 | 1 |   |
| 1 | Pingguo | 3 | 50 | 34 | 2 | 1 |   | 1 |
| 1 | Pingguo | 3 | 51 | 47 | 2 | 2 |   | 1 |
| 1 | Pingguo | 3 | 52 | 51 | 2 | 2 | 1 | 1 |
| 1 | Pingguo | 3 | 53 | 48 | 2 | 1 | 1 | 1 |
| 1 | Pingguo | 3 | 54 | 32 | 2 | 1 |   | 1 |
| 1 | Pingguo | 3 | 55 | 28 | 2 | 1 | 1 | 1 |
| 1 | Pingguo | 3 | 56 | 69 | 3 | 1 | 1 |   |
| 1 | Pingguo | 3 | 57 | 63 | 2 | 1 | 1 |   |
| 1 | Pingguo | 3 | 58 | 27 | 2 | 1 | 1 |   |
| 1 | Pingguo | 3 | 59 | 52 | 2 | 1 | 1 |   |
| 1 | Pingguo | 3 | 60 | 40 | 2 | 1 | 1 | 1 |
| 1 | Pingguo | 3 | 61 | 54 | 2 | 1 | 1 | 1 |
| 1 | Pingguo | 3 | 62 | 42 | 2 | 1 | 1 | 1 |
| 1 | Pingguo | 3 | 63 | 25 | 2 | 1 | 1 |   |
| 1 | Pingguo | 3 | 64 | 49 | 2 | 1 | 1 | 1 |
| 1 | Pingguo | 3 | 65 | 67 | 3 | 1 | 1 |   |
| 1 | Pingguo | 3 | 66 | 75 | 3 | 1 | 1 |   |
| 1 | Pingguo | 3 | 67 | 58 | 2 | 1 | 1 | 1 |
| 1 | Pingguo | 3 | 68 | 39 | 2 | 2 | 1 |   |
| 1 | Pingguo | 3 | 69 | 32 | 2 | 1 |   | 1 |
| 1 | Pingguo | 3 | 70 | 44 | 2 | 1 | 1 | 1 |
| 1 | Pingguo | 3 | 71 | 49 | 2 | 1 | 1 | 1 |
| 1 | Pingguo | 3 | 72 | 43 | 2 | 1 | 1 | 1 |
| 1 | Pingguo | 3 | 73 | 66 | 3 | 1 | 1 | 1 |
| 1 | Pingguo | 3 | 74 | 20 | 2 | 1 | 1 | 1 |
| 1 | Pingguo | 3 | 75 | 64 | 2 | 1 |   | 1 |

|   |         |   |     |    |   |   |   |   |
|---|---------|---|-----|----|---|---|---|---|
| 1 | Pingguo | 3 | 76  | 59 | 2 | 1 | 1 |   |
| 1 | Pingguo | 3 | 77  | 48 | 2 | 1 | 1 | 1 |
| 1 | Pingguo | 3 | 78  | 31 | 2 | 2 |   | 1 |
| 1 | Pingguo | 3 | 79  | 28 | 2 | 1 | 1 | 1 |
| 1 | Pingguo | 3 | 80  | 72 | 3 | 1 | 1 | 1 |
| 1 | Pingguo | 3 | 81  | 59 | 2 | 1 | 1 |   |
| 1 | Pingguo | 3 | 82  | 34 | 2 | 1 | 1 | 1 |
| 1 | Pingguo | 3 | 83  | 20 | 2 | 1 |   | 1 |
| 1 | Pingguo | 3 | 84  | 65 | 3 | 2 | 1 | 1 |
| 1 | Pingguo | 3 | 85  | 74 | 3 | 2 |   | 1 |
| 1 | Pingguo | 3 | 86  | 78 | 3 | 2 | 1 | 1 |
| 1 | Pingguo | 3 | 87  | 19 | 2 | 2 | 1 |   |
| 1 | Pingguo | 3 | 88  | 70 | 3 | 2 | 1 | 1 |
| 1 | Pingguo | 3 | 89  | 65 | 3 | 2 | 1 | 1 |
| 1 | Pingguo | 3 | 90  | 48 | 2 | 2 |   | 1 |
| 1 | Pingguo | 3 | 91  | 45 | 2 | 1 | 1 |   |
| 1 | Pingguo | 3 | 92  | 24 | 2 | 1 | 1 | 1 |
| 1 | Pingguo | 3 | 93  | 69 | 3 | 1 | 1 |   |
| 1 | Pingguo | 3 | 94  | 75 | 3 | 1 | 1 |   |
| 1 | Pingguo | 3 | 95  | 65 | 3 | 1 | 1 |   |
| 1 | Pingguo | 3 | 96  | 29 | 2 | 1 | 1 | 1 |
| 1 | Pingguo | 3 | 97  | 33 | 2 | 2 | 1 | 1 |
| 1 | Pingguo | 3 | 98  | 63 | 2 | 1 | 1 |   |
| 1 | Pingguo | 3 | 99  | 39 | 2 | 1 | 1 |   |
| 1 | Pingguo | 3 | 100 | 68 | 3 | 2 | 1 | 1 |
| 1 | Pingguo | 3 | 101 | 27 | 2 | 2 | 1 | 1 |
| 1 | Pingguo | 3 | 102 | 39 | 2 | 1 | 1 | 1 |
| 1 | Pingguo | 3 | 103 | 34 | 2 | 1 | 1 | 1 |
| 1 | Pingguo | 3 | 104 | 25 | 2 | 2 | 1 | 1 |
| 1 | Pingguo | 3 | 105 | 54 | 2 | 1 | 1 |   |
| 1 | Pingguo | 3 | 106 | 49 | 2 | 1 |   | 1 |
| 1 | Pingguo | 3 | 107 | 74 | 3 | 1 | 1 |   |
| 1 | Pingguo | 3 | 108 | 62 | 2 | 1 | 1 | 1 |
| 1 | Pingguo | 3 | 109 | 54 | 2 | 1 | 1 |   |
| 1 | Pingguo | 3 | 110 | 33 | 2 | 1 | 1 |   |
| 1 | Pingguo | 3 | 111 | 32 | 2 | 1 |   | 1 |
| 1 | Pingguo | 3 | 112 | 50 | 2 | 1 | 1 |   |
| 1 | Pingguo | 3 | 113 | 80 | 3 | 1 | 1 |   |
| 1 | Pingguo | 3 | 114 | 63 | 2 | 1 | 1 | 1 |
| 1 | Pingguo | 3 | 115 | 63 | 2 | 1 | 1 | 1 |
| 1 | Pingguo | 3 | 116 | 35 | 2 | 2 | 1 |   |
| 1 | Pingguo | 3 | 117 | 57 | 2 | 2 | 1 | 1 |
| 1 | Pingguo | 3 | 118 | 43 | 2 | 1 |   | 1 |
| 1 | Pingguo | 3 | 119 | 57 | 2 | 1 | 1 |   |
| 1 | Pingguo | 3 | 120 | 57 | 2 | 2 | 1 | 1 |
| 1 | Pingguo | 3 | 121 | 67 | 3 | 1 | 1 |   |
| 1 | Pingguo | 3 | 122 | 55 | 2 | 1 | 1 |   |
| 1 | Pingguo | 3 | 123 | 59 | 2 | 1 | 1 |   |
| 1 | Pingguo | 3 | 124 | 49 | 2 | 2 | 1 |   |
| 1 | Pingguo | 3 | 125 | 65 | 3 | 2 | 1 | 1 |
| 1 | Pingguo | 3 | 126 | 67 | 3 | 1 | 1 |   |
| 1 | Pingguo | 3 | 127 | 67 | 3 | 1 | 1 | 1 |
| 1 | Pingguo | 3 | 128 | 58 | 2 | 1 | 1 | 1 |
| 1 | Pingguo | 3 | 129 | 31 | 2 | 1 | 1 | 1 |

|   |         |   |     |    |   |   |   |   |
|---|---------|---|-----|----|---|---|---|---|
| 1 | Pingguo | 3 | 130 | 45 | 2 | 1 | 1 | 1 |
| 1 | Pingguo | 3 | 131 | 65 | 3 | 1 |   | 1 |
| 1 | Pingguo | 3 | 132 | 82 | 3 | 1 | 1 |   |
| 1 | Pingguo | 3 | 133 | 33 | 2 | 1 |   | 1 |
| 1 | Pingguo | 3 | 134 | 64 | 2 | 1 |   | 1 |
| 1 | Pingguo | 3 | 135 | 26 | 2 | 1 | 1 | 1 |
| 1 | Pingguo | 3 | 136 | 66 | 3 | 2 | 1 | 1 |
| 1 | Pingguo | 3 | 137 | 19 | 2 | 1 | 1 |   |
| 1 | Pingguo | 3 | 138 | 27 | 2 | 2 |   | 1 |
| 1 | Pingguo | 3 | 139 | 60 | 2 | 1 | 1 | 1 |
| 1 | Pingguo | 3 | 140 | 67 | 3 | 1 | 1 |   |
| 1 | Pingguo | 3 | 141 | 38 | 2 | 1 | 1 |   |
| 1 | Pingguo | 3 | 142 | 41 | 2 | 1 | 1 | 1 |
| 1 | Pingguo | 3 | 143 | 48 | 2 | 1 |   | 1 |
| 1 | Pingguo | 3 | 144 | 52 | 2 | 1 | 1 |   |
| 1 | Pingguo | 3 | 145 | 65 | 3 | 1 | 1 | 1 |
| 1 | Pingguo | 3 | 146 | 34 | 2 | 2 |   | 1 |
| 1 | Pingguo | 3 | 147 | 36 | 2 | 2 | 1 |   |
| 1 | Pingguo | 3 | 148 | 73 | 3 | 2 | 1 | 1 |
| 1 | Pingguo | 3 | 149 | 53 | 2 | 1 | 1 | 1 |
| 1 | Pingguo | 3 | 150 | 62 | 2 | 1 | 1 | 1 |
| 1 | Pingguo | 3 | 151 | 85 | 3 | 1 | 1 | 1 |
| 1 | Pingguo | 3 | 152 | 48 | 2 | 1 | 1 |   |
| 1 | Pingguo | 3 | 153 | 80 | 3 | 1 | 1 |   |
| 1 | Pingguo | 3 | 154 | 55 | 2 | 1 | 1 |   |
| 1 | Pingguo | 3 | 155 | 50 | 2 | 2 | 1 | 1 |
| 1 | Pingguo | 3 | 156 | 57 | 2 | 1 | 1 | 1 |
| 1 | Pingguo | 3 | 157 | 59 | 2 | 1 | 1 | 1 |
| 1 | Pingguo | 3 | 158 | 32 | 2 | 1 | 1 |   |
| 1 | Pingguo | 3 | 159 | 75 | 3 | 2 | 1 |   |
| 1 | Pingguo | 3 | 160 | 76 | 3 | 1 | 1 |   |
| 1 | Pingguo | 3 | 161 | 60 | 2 | 1 |   | 1 |
| 1 | Pingguo | 3 | 162 | 48 | 2 | 2 | 1 | 1 |
| 1 | Pingguo | 3 | 163 | 78 | 3 | 1 |   | 1 |
| 1 | Pingguo | 3 | 164 | 74 | 3 | 2 |   | 1 |
| 1 | Pingguo | 3 | 165 | 49 | 2 | 1 | 1 |   |
| 1 | Pingguo | 3 | 166 | 40 | 2 | 1 | 1 | 1 |
| 1 | Pingguo | 3 | 167 | 36 | 2 | 1 | 1 |   |
| 1 | Pingguo | 3 | 168 | 40 | 2 | 1 | 1 |   |
| 1 | Pingguo | 3 | 169 | 38 | 2 | 2 | 1 | 1 |
| 1 | Pingguo | 3 | 170 | 68 | 3 | 1 | 1 | 1 |
| 1 | Pingguo | 3 | 171 | 28 | 2 | 1 | 1 | 1 |
| 1 | Pingguo | 3 | 172 | 65 | 3 | 1 | 1 |   |
| 1 | Pingguo | 3 | 173 | 44 | 2 | 1 | 1 | 1 |
| 1 | Pingguo | 3 | 174 | 39 | 2 | 1 | 1 |   |
| 1 | Pingguo | 3 | 175 | 45 | 2 | 1 |   | 1 |
| 1 | Pingguo | 3 | 176 | 56 | 2 | 1 | 1 |   |
| 1 | Pingguo | 3 | 177 | 30 | 2 | 1 | 1 | 1 |
| 1 | Pingguo | 3 | 178 | 60 | 2 | 1 | 1 | 1 |
| 1 | Pingguo | 3 | 179 | 63 | 2 | 1 | 1 | 1 |
| 1 | Pingguo | 3 | 180 | 55 | 2 | 1 | 1 |   |
| 1 | Pingguo | 3 | 181 | 70 | 3 | 2 |   | 1 |
| 1 | Pingguo | 3 | 182 | 60 | 2 | 2 | 1 | 1 |
| 1 | Pingguo | 3 | 183 | 43 | 2 | 1 | 1 |   |

|   |         |   |     |    |   |   |   |   |
|---|---------|---|-----|----|---|---|---|---|
| 1 | Pingguo | 3 | 184 | 65 | 3 | 1 | 1 |   |
| 1 | Pingguo | 3 | 185 | 21 | 2 | 2 | 1 |   |
| 1 | Pingguo | 3 | 186 | 66 | 3 | 1 | 1 | 1 |
| 1 | Pingguo | 3 | 187 | 31 | 2 | 1 | 1 | 1 |
| 1 | Pingguo | 3 | 188 | 76 | 3 | 2 | 1 | 1 |
| 1 | Pingguo | 3 | 189 | 73 | 3 | 1 |   | 1 |
| 1 | Pingguo | 3 | 190 | 74 | 3 | 1 | 1 | 1 |
| 1 | Pingguo | 3 | 191 | 47 | 2 | 1 | 1 |   |
| 1 | Pingguo | 3 | 192 | 44 | 2 | 1 | 1 | 1 |
| 1 | Pingguo | 3 | 193 | 30 | 2 | 2 | 1 | 1 |
| 1 | Pingguo | 3 | 194 | 31 | 2 | 2 |   | 1 |
| 1 | Pingguo | 3 | 195 | 51 | 2 | 1 | 1 | 1 |
| 1 | Pingguo | 3 | 196 | 35 | 2 | 1 | 1 | 1 |
| 1 | Pingguo | 3 | 197 | 81 | 3 | 1 | 1 |   |
| 1 | Pingguo | 3 | 198 | 54 | 2 | 1 | 1 | 1 |
| 1 | Pingguo | 3 | 199 | 65 | 3 | 2 |   | 1 |
| 1 | Pingguo | 3 | 200 | 64 | 2 | 2 | 1 | 1 |
| 1 | Pingguo | 3 | 201 | 34 | 2 | 2 | 1 |   |
| 1 | Pingguo | 3 | 202 | 70 | 3 | 1 | 1 |   |
| 1 | Pingguo | 3 | 203 | 75 | 3 | 1 | 1 |   |
| 1 | Pingguo | 3 | 204 | 55 | 2 | 1 | 1 | 1 |
| 1 | Pingguo | 3 | 205 | 43 | 2 | 1 | 1 |   |
| 1 | Pingguo | 3 | 206 | 31 | 2 | 1 | 1 |   |
| 1 | Pingguo | 3 | 207 | 73 | 3 | 2 | 1 | 1 |
| 1 | Pingguo | 3 | 208 | 42 | 2 | 1 |   | 1 |
| 1 | Pingguo | 3 | 209 | 36 | 2 | 1 | 1 | 1 |
| 1 | Pingguo | 3 | 210 | 61 | 2 | 1 | 1 | 1 |
| 1 | Pingguo | 3 | 211 | 23 | 2 | 2 | 1 | 1 |
| 1 | Pingguo | 3 | 212 | 35 | 2 | 1 | 1 |   |
| 1 | Pingguo | 3 | 213 | 84 | 3 | 2 | 1 |   |
| 1 | Pingguo | 3 | 214 | 32 | 2 | 1 | 1 | 1 |
| 1 | Pingguo | 3 | 215 | 30 | 2 | 1 | 1 |   |
| 1 | Pingguo | 3 | 216 | 85 | 3 | 1 |   | 1 |
| 1 | Pingguo | 3 | 217 | 76 | 3 | 1 | 1 | 1 |
| 1 | Pingguo | 3 | 218 | 42 | 2 | 1 | 1 |   |
| 1 | Pingguo | 3 | 219 | 57 | 2 | 1 |   | 1 |
| 1 | Pingguo | 3 | 220 | 53 | 2 | 1 | 1 |   |
| 1 | Pingguo | 3 | 221 | 53 | 2 | 1 | 1 |   |
| 1 | Pingguo | 3 | 222 | 18 | 2 | 2 | 1 |   |
| 1 | Pingguo | 3 | 223 | 64 | 2 | 1 | 1 |   |
| 1 | Pingguo | 3 | 224 | 25 | 2 | 2 | 1 | 1 |
| 1 | Pingguo | 3 | 225 | 61 | 2 | 1 | 1 |   |
| 1 | Pingguo | 3 | 226 | 71 | 3 | 1 | 1 |   |
| 1 | Pingguo | 3 | 227 | 71 | 3 | 1 | 1 | 1 |
| 1 | Pingguo | 3 | 228 | 69 | 3 | 2 | 1 | 1 |
| 1 | Pingguo | 3 | 229 | 57 | 2 | 2 | 1 |   |
| 1 | Pingguo | 3 | 230 | 82 | 3 | 1 | 1 | 1 |
| 1 | Pingguo | 3 | 231 | 73 | 3 | 1 | 1 | 1 |
| 1 | Pingguo | 3 | 232 | 24 | 2 | 2 | 1 | 1 |
| 1 | Pingguo | 3 | 233 | 64 | 2 | 1 | 1 | 1 |
| 1 | Pingguo | 3 | 234 | 55 | 2 | 1 | 1 | 1 |
| 1 | Pingguo | 3 | 235 | 23 | 2 | 1 | 1 |   |
| 1 | Pingguo | 3 | 236 | 17 | 2 | 1 | 1 | 1 |
| 1 | Pingguo | 3 | 237 | 22 | 2 | 1 | 1 |   |

|   |         |   |     |    |   |   |   |   |
|---|---------|---|-----|----|---|---|---|---|
| 1 | Pingguo | 3 | 238 | 70 | 3 | 1 | 1 | 1 |
| 1 | Pingguo | 3 | 239 | 70 | 3 | 2 | 1 | 1 |
| 1 | Pingguo | 3 | 240 | 71 | 3 | 2 | 1 | 1 |
| 1 | Pingguo | 3 | 241 | 37 | 2 | 1 | 1 | 1 |
| 1 | Pingguo | 3 | 242 | 65 | 3 | 1 |   | 1 |
| 1 | Pingguo | 3 | 243 | 73 | 3 | 1 | 1 | 1 |
| 1 | Pingguo | 3 | 244 | 37 | 2 | 1 | 1 |   |
| 1 | Pingguo | 3 | 245 | 36 | 2 | 1 | 1 |   |
| 1 | Pingguo | 3 | 246 | 42 | 2 | 1 |   | 1 |
| 1 | Pingguo | 3 | 247 | 69 | 3 | 1 | 1 |   |
| 1 | Pingguo | 3 | 248 | 14 | 1 | 1 | 1 |   |
| 1 | Pingguo | 3 | 249 | 56 | 2 | 2 | 1 | 1 |
| 1 | Pingguo | 3 | 250 | 66 | 3 | 1 |   | 1 |
| 1 | Pingguo | 3 | 251 | 46 | 2 | 1 |   | 1 |
| 1 | Pingguo | 3 | 252 | 78 | 3 | 1 | 1 | 1 |
| 1 | Pingguo | 3 | 253 | 27 | 2 | 2 | 1 | 1 |
| 1 | Pingguo | 3 | 254 | 71 | 3 | 2 | 1 | 1 |
| 1 | Pingguo | 3 | 255 | 80 | 3 | 1 | 1 |   |
| 1 | Pingguo | 3 | 256 | 53 | 2 | 1 | 1 |   |
| 1 | Pingguo | 3 | 257 | 44 | 2 | 1 | 1 | 1 |
| 1 | Pingguo | 3 | 258 | 60 | 2 | 1 |   | 1 |
| 1 | Pingguo | 3 | 259 | 30 | 2 | 1 | 1 | 1 |
| 1 | Pingguo | 3 | 260 | 63 | 2 | 1 | 1 | 1 |
| 1 | Pingguo | 3 | 261 | 61 | 2 | 1 | 1 | 1 |
| 1 | Pingguo | 3 | 262 | 28 | 2 | 1 | 1 | 1 |
| 1 | Pingguo | 3 | 263 | 75 | 3 | 2 | 1 |   |
| 1 | Pingguo | 3 | 264 | 75 | 3 | 2 | 1 | 1 |
| 1 | Pingguo | 3 | 265 | 73 | 3 | 2 | 1 |   |
| 1 | Pingguo | 3 | 266 | 85 | 3 | 1 | 1 | 1 |
| 1 | Pingguo | 3 | 267 | 66 | 3 | 1 | 1 |   |
| 1 | Pingguo | 3 | 268 | 37 | 2 | 1 | 1 |   |
| 1 | Pingguo | 3 | 269 | 44 | 2 | 2 | 1 | 1 |
| 1 | Pingguo | 3 | 270 | 50 | 2 | 2 | 1 | 1 |
| 1 | Pingguo | 3 | 271 | 40 | 2 | 1 |   | 1 |
| 1 | Pingguo | 3 | 272 | 75 | 3 | 1 | 1 |   |
| 1 | Pingguo | 3 | 273 | 25 | 2 | 1 | 1 |   |
| 1 | Pingguo | 3 | 274 | 35 | 2 | 1 | 1 | 1 |
| 1 | Pingguo | 3 | 275 | 70 | 3 | 1 | 1 | 1 |
| 1 | Pingguo | 3 | 276 | 24 | 2 | 2 | 1 | 1 |
| 1 | Pingguo | 3 | 277 | 73 | 3 | 2 | 1 | 1 |
| 1 | Pingguo | 3 | 278 | 43 | 2 | 1 | 1 |   |
| 1 | Pingguo | 3 | 279 | 70 | 3 | 1 | 1 | 1 |
| 1 | Pingguo | 3 | 280 | 74 | 3 | 2 | 1 |   |
| 1 | Pingguo | 3 | 281 | 70 | 3 | 1 | 1 | 1 |
| 1 | Pingguo | 3 | 282 | 40 | 2 | 1 |   | 1 |
| 1 | Pingguo | 3 | 283 | 67 | 3 | 2 | 1 | 1 |
| 1 | Pingguo | 3 | 284 | 70 | 3 | 2 | 1 |   |
| 1 | Pingguo | 3 | 285 | 73 | 3 | 2 |   | 1 |
| 1 | Pingguo | 3 | 286 | 50 | 2 | 1 |   | 1 |
| 1 | Pingguo | 3 | 287 | 46 | 2 | 1 | 1 |   |
| 1 | Pingguo | 3 | 288 | 42 | 2 | 1 | 1 | 1 |
| 1 | Pingguo | 3 | 289 | 63 | 2 | 2 |   | 1 |
| 1 | Pingguo | 3 | 290 | 29 | 2 | 1 | 1 |   |
| 1 | Pingguo | 3 | 291 | 36 | 2 | 1 | 1 | 1 |

|   |         |   |     |    |   |   |   |   |
|---|---------|---|-----|----|---|---|---|---|
| 1 | Pingguo | 3 | 292 | 72 | 3 | 2 | 1 | 1 |
| 1 | Pingguo | 3 | 293 | 70 | 3 | 2 |   | 1 |
| 1 | Pingguo | 3 | 294 | 45 | 2 | 1 | 1 | 1 |
| 1 | Pingguo | 3 | 295 | 57 | 2 | 2 | 1 |   |
| 1 | Pingguo | 3 | 296 | 74 | 3 | 1 | 1 |   |
| 1 | Pingguo | 3 | 297 | 84 | 3 | 1 | 1 |   |
| 1 | Pingguo | 3 | 298 | 53 | 2 | 1 | 1 | 1 |
| 1 | Pingguo | 3 | 299 | 77 | 3 | 1 | 1 |   |
| 1 | Pingguo | 3 | 300 | 47 | 2 | 1 |   | 1 |
| 1 | Pingguo | 3 | 301 | 75 | 3 | 2 | 1 |   |
| 1 | Pingguo | 3 | 302 | 46 | 2 | 1 |   | 1 |
| 1 | Pingguo | 3 | 303 | 64 | 2 | 1 | 1 |   |
| 1 | Pingguo | 3 | 304 | 49 | 2 | 2 | 1 | 1 |
| 1 | Pingguo | 3 | 305 | 45 | 2 | 1 | 1 |   |
| 1 | Pingguo | 3 | 306 | 46 | 2 | 1 | 1 |   |
| 1 | Pingguo | 3 | 307 | 41 | 2 | 1 |   | 1 |
| 1 | Pingguo | 3 | 308 | 60 | 2 | 1 | 1 | 1 |
| 1 | Pingguo | 3 | 309 | 55 | 2 | 1 | 1 |   |
| 1 | Pingguo | 3 | 310 | 50 | 2 | 1 | 1 |   |
| 1 | Pingguo | 3 | 311 | 69 | 3 | 1 | 1 |   |
| 1 | Pingguo | 3 | 312 | 30 | 2 | 2 | 1 | 1 |
| 1 | Pingguo | 3 | 313 | 20 | 2 | 2 | 1 |   |
| 1 | Pingguo | 3 | 314 | 61 | 2 | 1 | 1 |   |
| 1 | Pingguo | 3 | 315 | 53 | 2 | 1 | 1 |   |
| 1 | Pingguo | 3 | 316 | 65 | 3 | 1 | 1 | 1 |
| 1 | Pingguo | 3 | 317 | 66 | 3 | 1 | 1 |   |
| 1 | Pingguo | 3 | 318 | 38 | 2 | 1 | 1 |   |
| 1 | Pingguo | 3 | 319 | 31 | 2 | 2 | 1 |   |
| 1 | Pingguo | 3 | 320 | 24 | 2 | 1 |   | 1 |
| 1 | Pingguo | 3 | 321 | 57 | 2 | 2 | 1 | 1 |
| 1 | Pingguo | 3 | 322 | 78 | 3 | 2 | 1 |   |
| 1 | Pingguo | 3 | 323 | 64 | 2 | 2 |   | 1 |
| 1 | Pingguo | 3 | 324 | 15 | 2 | 2 | 1 | 1 |
| 1 | Pingguo | 3 | 325 | 77 | 3 | 1 | 1 |   |
| 1 | Pingguo | 3 | 326 | 21 | 2 | 1 | 1 | 1 |
| 1 | Pingguo | 3 | 327 | 23 | 2 | 1 | 1 |   |
| 1 | Pingguo | 3 | 328 | 21 | 2 | 1 | 1 | 1 |
| 1 | Pingguo | 3 | 329 | 23 | 2 | 1 | 1 |   |
| 1 | Pingguo | 3 | 330 | 62 | 2 | 2 | 1 | 1 |
| 1 | Pingguo | 3 | 331 | 22 | 2 | 1 | 1 |   |
| 1 | Pingguo | 3 | 332 | 82 | 3 | 2 | 1 |   |
| 1 | Pingguo | 3 | 333 | 73 | 3 | 1 | 1 | 1 |
| 1 | Pingguo | 3 | 334 | 67 | 3 | 1 | 1 |   |
| 1 | Pingguo | 3 | 335 | 23 | 2 | 1 | 1 |   |
| 1 | Pingguo | 3 | 336 | 7  | 1 | 1 | 1 |   |
| 1 | Pingguo | 3 | 337 | 46 | 2 | 1 | 1 | 1 |
| 1 | Pingguo | 3 | 338 | 66 | 3 | 1 | 1 | 1 |
| 1 | Pingguo | 3 | 339 | 44 | 2 | 1 | 1 |   |
| 1 | Pingguo | 3 | 340 | 68 | 3 | 2 | 1 |   |
| 1 | Pingguo | 3 | 341 | 70 | 3 | 2 |   | 1 |
| 1 | Pingguo | 3 | 342 | 74 | 3 | 1 | 1 |   |
| 1 | Pingguo | 3 | 343 | 58 | 2 | 1 | 1 | 1 |
| 1 | Pingguo | 3 | 344 | 61 | 2 | 1 | 1 | 1 |
| 1 | Pingguo | 3 | 345 | 44 | 2 | 1 | 1 |   |

|   |         |   |     |    |   |   |   |   |
|---|---------|---|-----|----|---|---|---|---|
| 1 | Pingguo | 3 | 346 | 38 | 2 | 2 | 1 |   |
| 1 | Pingguo | 3 | 347 | 51 | 2 | 1 | 1 | 1 |
| 1 | Pingguo | 3 | 348 | 31 | 2 | 1 | 1 |   |
| 1 | Pingguo | 3 | 349 | 71 | 3 | 1 | 1 |   |
| 1 | Pingguo | 3 | 350 | 68 | 3 | 1 | 1 |   |
| 1 | Pingguo | 3 | 351 | 70 | 3 | 1 | 1 |   |
| 1 | Pingguo | 3 | 352 | 41 | 2 | 2 |   | 1 |
| 1 | Pingguo | 3 | 353 | 28 | 2 | 1 | 1 |   |
| 1 | Pingguo | 3 | 354 | 59 | 2 | 1 |   | 1 |
| 1 | Pingguo | 3 | 355 | 50 | 2 | 1 | 1 |   |
| 1 | Pingguo | 3 | 356 | 86 | 3 | 2 | 1 |   |
| 1 | Pingguo | 3 | 357 | 52 | 2 | 2 | 1 | 1 |
| 1 | Pingguo | 3 | 358 | 74 | 3 | 1 | 1 |   |
| 1 | Pingguo | 3 | 359 | 35 | 2 | 2 | 1 |   |
| 1 | Pingguo | 3 | 360 | 50 | 2 | 1 | 1 | 1 |
| 1 | Pingguo | 3 | 361 | 71 | 3 | 2 | 1 |   |
| 1 | Pingguo | 3 | 362 | 40 | 2 | 2 | 1 |   |
| 1 | Pingguo | 3 | 363 | 54 | 2 | 2 | 1 |   |
| 1 | Pingguo | 3 | 364 | 35 | 2 | 1 | 1 | 1 |
| 1 | Pingguo | 3 | 365 | 73 | 3 | 2 |   | 1 |
| 1 | Pingguo | 3 | 366 | 26 | 2 | 1 | 1 | 1 |
| 1 | Pingguo | 3 | 367 | 79 | 3 | 1 | 1 |   |
| 1 | Pingguo | 3 | 368 | 17 | 2 | 1 |   | 1 |
| 1 | Pingguo | 3 | 369 | 56 | 2 | 1 | 2 |   |
| 1 | Pingguo | 3 | 370 | 47 | 2 | 1 | 2 |   |
| 1 | Pingguo | 3 | 371 | 33 | 2 | 1 | 2 |   |
| 1 | Pingguo | 3 | 372 | 84 | 3 | 1 | 2 |   |
| 1 | Pingguo | 3 | 373 | 63 | 2 | 1 | 2 |   |
| 1 | Pingguo | 3 | 374 | 40 | 2 | 2 | 2 |   |
| 1 | Pingguo | 3 | 375 | 49 | 2 | 2 | 2 |   |
| 1 | Pingguo | 3 | 376 | 66 | 3 | 1 | 2 |   |
| 1 | Pingguo | 3 | 377 | 61 | 2 | 1 | 2 |   |
| 1 | Pingguo | 3 | 378 | 39 | 2 | 1 | 2 |   |
| 1 | Pingguo | 3 | 379 | 52 | 2 | 1 | 2 |   |
| 1 | Pingguo | 3 | 380 | 32 | 2 | 1 | 2 |   |
| 1 | Pingguo | 3 | 381 | 62 | 2 | 2 | 2 |   |
| 1 | Pingguo | 3 | 382 | 33 | 2 | 1 | 2 |   |
| 1 | Pingguo | 3 | 383 | 72 | 3 | 2 | 2 |   |
| 1 | Pingguo | 3 | 384 | 62 | 2 | 1 | 2 |   |
| 1 | Pingguo | 3 | 385 | 58 | 2 | 2 | 2 |   |
| 1 | Pingguo | 3 | 386 | 50 | 2 | 1 | 2 |   |
| 1 | Pingguo | 3 | 387 | 60 | 2 | 1 | 2 |   |
| 1 | Pingguo | 3 | 388 | 32 | 2 | 1 | 2 |   |
| 1 | Pingguo | 3 | 389 | 45 | 2 | 1 | 2 |   |
| 1 | Pingguo | 3 | 390 | 67 | 3 | 1 | 2 |   |
| 1 | Pingguo | 3 | 391 | 31 | 2 | 1 | 2 |   |
| 1 | Pingguo | 3 | 392 | 52 | 2 | 1 | 2 |   |
| 1 | Pingguo | 3 | 393 | 40 | 2 | 2 | 2 |   |
| 1 | Pingguo | 3 | 394 | 37 | 2 | 1 | 2 |   |
| 1 | Pingguo | 3 | 395 | 75 | 3 | 1 | 2 |   |
| 1 | Pingguo | 3 | 396 | 58 | 2 | 1 | 2 |   |
| 1 | Pingguo | 3 | 397 | 57 | 2 | 1 | 2 |   |
| 1 | Pingguo | 3 | 398 | 50 | 2 | 1 | 2 |   |
| 1 | Pingguo | 3 | 399 | 47 | 2 | 1 | 2 |   |



|   |         |   |     |    |   |   |   |   |
|---|---------|---|-----|----|---|---|---|---|
| 1 | Pingguo | 3 | 400 | 68 | 3 | 2 | 2 |   |
| 1 | Pingguo | 3 | 401 | 48 | 2 | 1 | 2 |   |
| 1 | Pingguo | 3 | 402 | 71 | 3 | 1 | 2 |   |
| 1 | Pingguo | 3 | 403 | 31 | 2 | 1 | 2 |   |
| 1 | Pingguo | 3 | 404 | 62 | 2 | 1 | 2 |   |
| 1 | Pingguo | 3 | 405 | 25 | 2 | 1 | 2 |   |
| 1 | Pingguo | 3 | 406 | 70 | 3 | 1 | 2 |   |
| 1 | Pingguo | 3 | 407 | 72 | 3 | 1 | 2 |   |
| 1 | Pingguo | 3 | 408 | 79 | 3 | 1 | 2 |   |
| 1 | Pingguo | 3 | 409 | 83 | 3 | 2 | 2 |   |
| 1 | Pingguo | 3 | 410 | 67 | 3 | 1 |   |   |
| 1 | Pingguo | 3 | 411 | 90 | 3 | 1 |   |   |
| 1 | Pingguo | 3 | 412 | 64 | 2 | 1 |   |   |
| 1 | Pingguo | 3 | 413 | 50 | 2 | 1 |   |   |
| 1 | Pingguo | 3 | 414 | 39 | 2 | 2 |   |   |
| 1 | Pingguo | 3 | 415 | 80 | 3 | 1 |   |   |
| 1 | Pingguo | 3 | 416 | 34 | 2 | 1 |   |   |
| 2 | Weishi  | 2 | 417 | 44 | 2 | 1 |   | 1 |
| 2 | Weishi  | 2 | 418 | 18 | 2 | 1 |   | 1 |
| 2 | Weishi  | 2 | 419 | 74 | 3 | 2 |   | 1 |
| 2 | Weishi  | 2 | 420 | 28 | 2 | 1 |   | 1 |
| 2 | Weishi  | 2 | 421 | 22 | 2 | 1 |   | 1 |
| 2 | Weishi  | 2 | 422 | 20 | 2 | 1 |   | 1 |
| 2 | Weishi  | 2 | 423 | 28 | 2 | 1 | 1 | 1 |
| 2 | Weishi  | 2 | 424 | 20 | 2 | 1 |   | 1 |
| 2 | Weishi  | 2 | 425 | 25 | 2 | 1 |   | 1 |
| 2 | Weishi  | 2 | 426 | 26 | 2 | 2 |   | 1 |
| 2 | Weishi  | 2 | 427 | 64 | 2 | 2 |   | 1 |
| 2 | Weishi  | 2 | 428 | 35 | 2 | 2 |   | 1 |
| 2 | Weishi  | 2 | 429 | 56 | 2 | 1 |   | 1 |
| 2 | Weishi  | 2 | 430 | 71 | 3 | 1 |   | 1 |
| 2 | Weishi  | 2 | 431 | 30 | 2 | 2 |   | 1 |
| 2 | Weishi  | 2 | 432 | 28 | 2 | 1 |   | 1 |
| 2 | Weishi  | 2 | 433 | 28 | 2 | 2 |   | 1 |
| 2 | Weishi  | 2 | 434 | 50 | 2 | 2 |   | 1 |
| 2 | Weishi  | 2 | 435 | 62 | 2 | 1 |   | 1 |
| 2 | Weishi  | 2 | 436 | 61 | 2 | 1 | 1 |   |
| 2 | Weishi  | 2 | 437 | 49 | 2 | 2 | 1 |   |
| 2 | Weishi  | 2 | 438 | 59 | 2 | 1 | 1 | 1 |
| 2 | Weishi  | 2 | 439 | 59 | 2 | 1 |   | 1 |
| 2 | Weishi  | 2 | 440 | 29 | 2 | 1 |   | 1 |
| 2 | Weishi  | 2 | 441 | 62 | 2 | 1 |   | 1 |
| 2 | Weishi  | 2 | 442 | 44 | 2 | 1 |   | 1 |
| 2 | Weishi  | 2 | 443 | 54 | 2 | 1 |   | 1 |
| 2 | Weishi  | 2 | 444 | 51 | 2 | 1 |   | 1 |
| 2 | Weishi  | 2 | 445 | 78 | 3 | 2 |   | 1 |
| 2 | Weishi  | 2 | 446 | 66 | 3 | 1 |   | 1 |
| 2 | Weishi  | 2 | 447 | 72 | 3 | 1 |   | 1 |
| 2 | Weishi  | 2 | 448 | 78 | 3 | 2 | 1 | 1 |
| 2 | Weishi  | 2 | 449 | 57 | 2 | 1 |   | 1 |
| 2 | Weishi  | 2 | 450 | 23 | 2 | 1 | 1 |   |
| 2 | Weishi  | 2 | 451 | 65 | 3 | 1 | 1 | 1 |
| 2 | Weishi  | 2 | 452 | 75 | 3 | 1 | 1 |   |
| 2 | Weishi  | 2 | 453 | 16 | 2 | 2 | 1 |   |

|   |        |   |     |    |   |   |   |   |
|---|--------|---|-----|----|---|---|---|---|
| 2 | Weishi | 2 | 454 | 48 | 2 | 1 | 1 |   |
| 2 | Weishi | 2 | 455 | 83 | 3 | 2 | 1 |   |
| 2 | Weishi | 2 | 456 | 32 | 2 | 2 | 1 |   |
| 2 | Weishi | 2 | 457 | 67 | 3 | 1 | 1 |   |
| 2 | Weishi | 2 | 458 | 80 | 3 | 1 | 1 |   |
| 2 | Weishi | 2 | 459 | 58 | 2 | 2 | 1 |   |
| 2 | Weishi | 2 | 460 | 66 | 3 | 1 | 1 |   |
| 2 | Weishi | 2 | 461 | 62 | 2 | 1 | 1 |   |
| 2 | Weishi | 2 | 462 | 53 | 2 | 1 | 1 |   |
| 2 | Weishi | 2 | 463 | 74 | 3 | 1 | 1 |   |
| 2 | Weishi | 2 | 464 | 78 | 3 | 1 | 1 |   |
| 2 | Weishi | 2 | 465 | 30 | 2 | 2 | 1 |   |
| 2 | Weishi | 2 | 466 | 48 | 2 | 2 | 1 |   |
| 2 | Weishi | 2 | 467 | 82 | 3 | 1 | 1 |   |
| 2 | Weishi | 2 | 468 | 47 | 2 | 1 | 1 |   |
| 2 | Weishi | 2 | 469 | 64 | 2 | 1 | 1 |   |
| 2 | Weishi | 2 | 470 | 79 | 3 | 2 | 1 | 1 |
| 2 | Weishi | 2 | 471 | 63 | 2 | 1 | 1 |   |
| 2 | Weishi | 2 | 472 | 84 | 3 | 2 | 1 |   |
| 2 | Weishi | 2 | 473 | 78 | 3 | 1 | 1 |   |
| 2 | Weishi | 2 | 474 | 79 | 3 | 1 | 1 |   |
| 2 | Weishi | 2 | 475 | 78 | 3 | 1 | 1 |   |
| 2 | Weishi | 2 | 476 | 52 | 2 | 1 | 1 |   |
| 2 | Weishi | 2 | 477 | 51 | 2 | 2 | 1 |   |
| 2 | Weishi | 2 | 478 | 21 | 2 | 1 | 1 |   |
| 2 | Weishi | 2 | 479 | 19 | 2 | 1 | 1 |   |
| 2 | Weishi | 2 | 480 | 55 | 2 | 1 | 1 |   |
| 2 | Weishi | 2 | 481 | 25 | 2 | 2 | 1 | 1 |
| 2 | Weishi | 2 | 482 | 81 | 3 | 1 | 1 | 1 |
| 2 | Weishi | 2 | 483 | 75 | 3 | 1 | 1 | 1 |
| 2 | Weishi | 2 | 484 | 58 | 2 | 1 | 1 |   |
| 2 | Weishi | 2 | 485 | 75 | 3 | 2 | 1 |   |
| 2 | Weishi | 2 | 486 | 74 | 3 | 2 | 1 | 1 |
| 2 | Weishi | 2 | 487 | 55 | 2 | 1 | 1 |   |
| 2 | Weishi | 2 | 488 | 26 | 2 | 1 | 1 |   |
| 2 | Weishi | 2 | 489 | 24 | 2 | 1 | 1 |   |
| 2 | Weishi | 2 | 490 | 60 | 2 | 1 | 1 |   |
| 2 | Weishi | 2 | 491 | 64 | 2 | 1 | 1 |   |
| 2 | Weishi | 2 | 492 | 26 | 2 | 1 | 1 |   |
| 2 | Weishi | 2 | 493 | 61 | 2 | 1 | 1 |   |
| 2 | Weishi | 2 | 494 | 25 | 2 | 2 | 1 |   |
| 2 | Weishi | 2 | 495 | 63 | 2 | 1 | 1 |   |
| 2 | Weishi | 2 | 496 | 51 | 2 | 1 | 1 |   |
| 2 | Weishi | 2 | 497 | 19 | 2 | 2 | 1 | 1 |
| 2 | Weishi | 2 | 498 | 70 | 3 | 1 | 1 | 1 |
| 2 | Weishi | 2 | 499 | 26 | 2 | 1 | 1 | 1 |
| 2 | Weishi | 2 | 500 | 58 | 2 | 2 | 1 |   |
| 2 | Weishi | 2 | 501 | 52 | 2 | 1 | 1 |   |
| 2 | Weishi | 2 | 502 | 56 | 2 | 2 | 1 |   |
| 2 | Weishi | 2 | 503 | 63 | 2 | 1 | 1 |   |
| 2 | Weishi | 2 | 504 | 56 | 2 | 1 | 1 |   |
| 2 | Weishi | 2 | 505 | 27 | 2 | 2 | 1 |   |
| 2 | Weishi | 2 | 506 | 39 | 2 | 1 | 1 |   |
| 2 | Weishi | 2 | 507 | 70 | 3 | 1 | 1 |   |

|   |        |   |     |    |   |   |   |   |
|---|--------|---|-----|----|---|---|---|---|
| 2 | Weishi | 2 | 508 | 22 | 2 | 1 | 1 |   |
| 2 | Weishi | 2 | 509 | 82 | 3 | 1 | 1 |   |
| 2 | Weishi | 2 | 510 | 60 | 2 | 1 | 1 |   |
| 2 | Weishi | 2 | 511 | 22 | 2 | 1 | 1 |   |
| 2 | Weishi | 2 | 512 | 60 | 2 | 2 | 1 |   |
| 2 | Weishi | 2 | 513 | 56 | 2 | 2 | 1 |   |
| 2 | Weishi | 2 | 514 | 94 | 3 | 2 | 1 |   |
| 2 | Weishi | 2 | 515 | 75 | 3 | 1 | 1 | 1 |
| 2 | Weishi | 2 | 516 | 23 | 2 | 1 | 1 |   |
| 2 | Weishi | 2 | 517 | 69 | 3 | 1 | 1 |   |
| 2 | Weishi | 2 | 518 | 76 | 3 | 1 | 1 |   |
| 2 | Weishi | 2 | 519 | 73 | 3 | 1 | 1 |   |
| 2 | Weishi | 2 | 520 | 30 | 2 | 1 | 1 |   |
| 2 | Weishi | 2 | 521 | 78 | 3 | 2 | 1 |   |
| 2 | Weishi | 2 | 522 | 44 | 2 | 1 | 1 |   |
| 2 | Weishi | 2 | 523 | 63 | 2 | 1 | 1 |   |
| 2 | Weishi | 2 | 524 | 67 | 3 | 2 | 1 | 1 |
| 2 | Weishi | 2 | 525 | 22 | 2 | 2 | 1 |   |
| 2 | Weishi | 2 | 526 | 71 | 3 | 1 | 1 |   |
| 2 | Weishi | 2 | 527 | 22 | 2 | 1 | 1 |   |
| 2 | Weishi | 2 | 528 | 85 | 3 | 1 | 1 |   |
| 2 | Weishi | 2 | 529 | 49 | 2 | 1 | 1 |   |
| 2 | Weishi | 2 | 530 | 23 | 2 | 1 | 1 |   |
| 2 | Weishi | 2 | 531 | 40 | 2 | 2 | 1 |   |
| 2 | Weishi | 2 | 532 | 45 | 2 | 1 | 1 |   |
| 2 | Weishi | 2 | 533 | 44 | 2 | 2 | 1 |   |
| 2 | Weishi | 2 | 534 | 53 | 2 | 2 | 1 | 1 |
| 2 | Weishi | 2 | 535 | 48 | 2 | 2 | 1 |   |
| 2 | Weishi | 2 | 536 | 70 | 3 | 1 | 1 |   |
| 2 | Weishi | 2 | 537 | 80 | 3 | 2 | 1 |   |
| 2 | Weishi | 2 | 538 | 58 | 2 | 1 | 1 |   |
| 2 | Weishi | 2 | 539 | 53 | 2 | 1 | 1 |   |
| 2 | Weishi | 2 | 540 | 79 | 3 | 1 | 1 |   |
| 2 | Weishi | 2 | 541 | 45 | 2 | 1 | 1 |   |
| 2 | Weishi | 2 | 542 | 84 | 3 | 1 | 1 |   |
| 2 | Weishi | 2 | 543 | 25 | 2 | 1 | 1 |   |
| 2 | Weishi | 2 | 544 | 51 | 2 | 1 | 1 |   |
| 2 | Weishi | 2 | 545 | 53 | 2 | 2 | 1 |   |
| 2 | Weishi | 2 | 546 | 66 | 3 | 1 | 1 |   |
| 2 | Weishi | 2 | 547 | 27 | 2 | 1 | 1 |   |
| 2 | Weishi | 2 | 548 | 35 | 2 | 1 | 1 | 1 |
| 2 | Weishi | 2 | 549 | 78 | 3 | 1 | 1 |   |
| 2 | Weishi | 2 | 550 | 62 | 2 | 1 | 1 |   |
| 2 | Weishi | 2 | 551 | 67 | 3 | 1 | 1 |   |
| 2 | Weishi | 2 | 552 | 66 | 3 | 2 | 1 |   |
| 2 | Weishi | 2 | 553 | 67 | 3 | 2 | 1 |   |
| 2 | Weishi | 2 | 554 | 45 | 2 | 1 | 1 |   |
| 2 | Weishi | 2 | 555 | 30 | 2 | 2 | 1 |   |
| 2 | Weishi | 2 | 556 | 25 | 2 | 2 | 1 |   |
| 2 | Weishi | 2 | 557 | 75 | 3 | 1 | 1 | 1 |
| 2 | Weishi | 2 | 558 | 44 | 2 | 1 | 1 |   |
| 2 | Weishi | 2 | 559 | 81 | 3 | 1 | 1 |   |
| 2 | Weishi | 2 | 560 | 74 | 3 | 1 | 1 |   |
| 2 | Weishi | 2 | 561 | 32 | 2 | 1 | 1 | 1 |

|   |        |   |     |    |   |   |   |   |
|---|--------|---|-----|----|---|---|---|---|
| 2 | Weishi | 2 | 562 | 20 | 2 | 2 | 1 |   |
| 2 | Weishi | 2 | 563 | 43 | 2 | 2 | 1 |   |
| 2 | Weishi | 2 | 564 | 41 | 2 | 2 | 1 |   |
| 2 | Weishi | 2 | 565 | 59 | 2 | 1 | 1 |   |
| 2 | Weishi | 2 | 566 | 86 | 3 | 2 | 1 |   |
| 2 | Weishi | 2 | 567 | 68 | 3 | 1 | 1 |   |
| 2 | Weishi | 2 | 568 | 22 | 2 | 2 | 1 |   |
| 2 | Weishi | 2 | 569 | 81 | 3 | 1 | 1 |   |
| 2 | Weishi | 2 | 570 | 24 | 2 | 1 | 1 |   |
| 2 | Weishi | 2 | 571 | 66 | 3 | 2 | 1 |   |
| 2 | Weishi | 2 | 572 | 59 | 2 | 1 | 1 |   |
| 2 | Weishi | 2 | 573 | 21 | 2 | 1 | 1 |   |
| 2 | Weishi | 2 | 574 | 73 | 3 | 2 | 1 |   |
| 2 | Weishi | 2 | 575 | 23 | 2 | 2 | 1 |   |
| 2 | Weishi | 2 | 576 | 75 | 3 | 1 | 1 |   |
| 2 | Weishi | 2 | 577 | 77 | 3 | 1 | 1 |   |
| 2 | Weishi | 2 | 578 | 68 | 3 | 1 | 1 |   |
| 2 | Weishi | 2 | 579 | 65 | 3 | 1 | 1 |   |
| 2 | Weishi | 2 | 580 | 25 | 2 | 1 | 1 |   |
| 2 | Weishi | 2 | 581 | 86 | 3 | 2 | 1 |   |
| 2 | Weishi | 2 | 582 | 70 | 3 | 2 | 1 |   |
| 2 | Weishi | 2 | 583 | 36 | 2 | 2 | 1 | 1 |
| 2 | Weishi | 2 | 584 | 70 | 3 | 1 | 1 |   |
| 2 | Weishi | 2 | 585 | 39 | 2 | 1 | 1 |   |
| 2 | Weishi | 2 | 586 | 47 | 2 | 1 | 1 |   |
| 2 | Weishi | 2 | 587 | 70 | 3 | 1 | 1 |   |
| 2 | Weishi | 2 | 588 | 69 | 3 | 1 |   | 1 |
| 2 | Weishi | 2 | 589 | 66 | 3 | 1 | 1 |   |
| 2 | Weishi | 2 | 590 | 60 | 2 | 1 | 1 |   |
| 2 | Weishi | 2 | 591 | 58 | 2 | 2 |   | 1 |
| 2 | Weishi | 2 | 592 | 18 | 2 | 2 | 1 |   |
| 2 | Weishi | 2 | 593 | 83 | 3 | 1 | 1 |   |
| 2 | Weishi | 2 | 594 | 65 | 3 | 1 | 1 |   |
| 2 | Weishi | 2 | 595 | 59 | 2 | 2 | 1 |   |
| 2 | Weishi | 2 | 596 | 81 | 3 | 1 |   | 1 |
| 2 | Weishi | 2 | 597 | 23 | 2 | 1 | 1 | 1 |
| 2 | Weishi | 2 | 598 | 30 | 2 | 1 |   | 1 |
| 2 | Weishi | 2 | 599 | 66 | 3 | 2 | 1 |   |
| 2 | Weishi | 2 | 600 | 58 | 2 | 1 | 1 |   |
| 2 | Weishi | 2 | 601 | 37 | 2 | 2 | 1 |   |
| 2 | Weishi | 2 | 602 | 67 | 3 | 1 | 1 |   |
| 2 | Weishi | 2 | 603 | 80 | 3 | 2 |   | 1 |
| 2 | Weishi | 2 | 604 | 33 | 2 | 1 | 1 |   |
| 2 | Weishi | 2 | 605 | 77 | 3 | 1 | 1 | 1 |
| 2 | Weishi | 2 | 606 | 80 | 3 | 1 | 1 | 1 |
| 2 | Weishi | 2 | 607 | 55 | 2 | 2 | 1 |   |
| 2 | Weishi | 2 | 608 | 28 | 2 | 2 | 1 |   |
| 2 | Weishi | 2 | 609 | 66 | 3 | 2 | 1 |   |
| 2 | Weishi | 2 | 610 | 20 | 2 | 1 |   | 1 |
| 2 | Weishi | 2 | 611 | 64 | 2 | 1 |   | 1 |
| 2 | Weishi | 2 | 612 | 45 | 2 | 1 |   | 1 |
| 2 | Weishi | 2 | 613 | 86 | 3 | 2 | 1 |   |
| 2 | Weishi | 2 | 614 | 63 | 2 | 1 | 1 |   |
| 2 | Weishi | 2 | 615 | 51 | 2 | 1 | 1 |   |

|   |        |   |     |    |   |   |   |   |
|---|--------|---|-----|----|---|---|---|---|
| 2 | Weishi | 2 | 616 | 49 | 2 | 2 | 1 |   |
| 2 | Weishi | 2 | 617 | 67 | 3 | 1 | 1 |   |
| 2 | Weishi | 2 | 618 | 58 | 2 | 1 | 1 |   |
| 2 | Weishi | 2 | 619 | 70 | 3 | 1 |   | 1 |
| 2 | Weishi | 2 | 620 | 8  | 1 | 1 |   | 1 |
| 2 | Weishi | 2 | 621 | 33 | 2 | 1 | 1 |   |
| 2 | Weishi | 2 | 622 | 72 | 3 | 1 |   | 1 |
| 2 | Weishi | 2 | 623 | 21 | 2 | 1 |   | 1 |
| 2 | Weishi | 2 | 624 | 92 | 3 | 1 |   | 1 |
| 2 | Weishi | 2 | 625 | 47 | 2 | 1 |   | 1 |
| 2 | Weishi | 2 | 626 | 52 | 2 | 1 |   | 1 |
| 2 | Weishi | 2 | 627 | 86 | 3 | 1 |   | 1 |
| 2 | Weishi | 2 | 628 | 31 | 2 | 1 | 1 |   |
| 2 | Weishi | 2 | 629 | 55 | 2 | 1 | 1 |   |
| 2 | Weishi | 2 | 630 | 18 | 2 | 1 | 1 |   |
| 2 | Weishi | 2 | 631 | 68 | 3 | 1 | 1 |   |
| 2 | Weishi | 2 | 632 | 21 | 2 | 2 |   | 1 |
| 2 | Weishi | 2 | 633 | 26 | 2 | 2 | 1 |   |
| 2 | Weishi | 2 | 634 | 18 | 2 | 1 |   | 1 |
| 2 | Weishi | 2 | 635 | 26 | 2 | 2 |   | 1 |
| 2 | Weishi | 2 | 636 | 54 | 2 | 1 | 1 | 1 |
| 2 | Weishi | 2 | 637 | 26 | 2 | 1 | 1 |   |
| 2 | Weishi | 2 | 638 | 52 | 2 | 2 | 1 |   |
| 2 | Weishi | 2 | 639 | 31 | 2 | 1 |   | 1 |
| 2 | Weishi | 2 | 640 | 28 | 2 | 1 | 1 |   |
| 2 | Weishi | 2 | 641 | 25 | 2 | 2 |   | 1 |
| 2 | Weishi | 2 | 642 | 26 | 2 | 1 |   | 1 |
| 2 | Weishi | 2 | 643 | 17 | 2 | 1 |   | 1 |
| 2 | Weishi | 2 | 644 | 57 | 2 | 1 |   | 1 |
| 2 | Weishi | 2 | 645 | 32 | 2 | 1 | 1 |   |
| 2 | Weishi | 2 | 646 | 48 | 2 | 1 | 1 |   |
| 2 | Weishi | 2 | 647 | 25 | 2 | 2 | 1 |   |
| 2 | Weishi | 2 | 648 | 51 | 2 | 1 | 1 |   |
| 2 | Weishi | 2 | 649 | 22 | 2 | 1 | 1 |   |
| 2 | Weishi | 2 | 650 | 82 | 3 | 2 | 1 |   |
| 2 | Weishi | 2 | 651 | 45 | 2 | 2 | 1 |   |
| 2 | Weishi | 2 | 652 | 17 | 2 | 1 | 1 | 1 |
| 2 | Weishi | 2 | 653 | 61 | 2 | 2 | 1 |   |
| 2 | Weishi | 2 | 654 | 82 | 3 | 1 |   | 1 |
| 2 | Weishi | 2 | 655 | 75 | 3 | 1 |   | 1 |
| 2 | Weishi | 2 | 656 | 47 | 2 | 1 |   | 1 |
| 2 | Weishi | 2 | 657 | 70 | 3 | 1 | 1 |   |
| 2 | Weishi | 2 | 658 | 66 | 3 | 1 |   | 1 |
| 2 | Weishi | 2 | 659 | 50 | 2 | 2 | 1 |   |
| 2 | Weishi | 2 | 660 | 70 | 3 | 1 | 1 |   |
| 2 | Weishi | 2 | 661 | 23 | 2 | 2 | 1 |   |
| 2 | Weishi | 2 | 662 | 70 | 3 | 1 | 1 |   |
| 2 | Weishi | 2 | 663 | 52 | 2 | 2 | 1 |   |
| 2 | Weishi | 2 | 664 | 62 | 2 | 1 | 1 |   |
| 2 | Weishi | 2 | 665 | 75 | 3 | 1 | 1 |   |
| 2 | Weishi | 2 | 666 | 69 | 3 | 1 |   | 1 |
| 2 | Weishi | 2 | 667 | 23 | 2 | 1 | 1 | 1 |
| 2 | Weishi | 2 | 668 | 77 | 3 | 1 |   | 1 |
| 2 | Weishi | 2 | 669 | 61 | 2 | 2 | 1 |   |

|   |        |   |     |    |   |   |   |   |
|---|--------|---|-----|----|---|---|---|---|
| 2 | Weishi | 2 | 670 | 21 | 2 | 1 |   | 1 |
| 2 | Weishi | 2 | 671 | 61 | 2 | 1 | 1 |   |
| 2 | Weishi | 2 | 672 | 78 | 3 | 1 |   | 1 |
| 2 | Weishi | 2 | 673 | 67 | 3 | 1 |   | 1 |
| 2 | Weishi | 2 | 674 | 62 | 2 | 1 | 1 |   |
| 2 | Weishi | 2 | 675 | 53 | 2 | 1 |   | 1 |
| 2 | Weishi | 2 | 676 | 15 | 2 | 1 | 1 |   |
| 2 | Weishi | 2 | 677 | 57 | 2 | 1 | 1 | 1 |
| 2 | Weishi | 2 | 678 | 32 | 2 | 1 | 1 |   |
| 2 | Weishi | 2 | 679 | 47 | 2 | 1 | 1 | 1 |
| 2 | Weishi | 2 | 680 | 84 | 3 | 1 |   | 1 |
| 2 | Weishi | 2 | 681 | 62 | 2 | 1 |   | 1 |
| 2 | Weishi | 2 | 682 | 31 | 2 | 2 | 1 |   |
| 2 | Weishi | 2 | 683 | 46 | 2 | 1 | 1 |   |
| 2 | Weishi | 2 | 684 | 66 | 3 | 1 | 1 |   |
| 2 | Weishi | 2 | 685 | 70 | 3 | 2 | 1 |   |
| 2 | Weishi | 2 | 686 | 84 | 3 | 1 |   | 1 |
| 2 | Weishi | 2 | 687 | 45 | 2 | 1 | 1 |   |
| 2 | Weishi | 2 | 688 | 85 | 3 | 2 | 1 |   |
| 2 | Weishi | 2 | 689 | 68 | 3 | 2 | 1 | 1 |
| 2 | Weishi | 2 | 690 | 52 | 2 | 1 | 1 |   |
| 2 | Weishi | 2 | 691 | 27 | 2 | 1 | 1 |   |
| 2 | Weishi | 2 | 692 | 63 | 2 | 1 | 1 |   |
| 2 | Weishi | 2 | 693 | 69 | 3 | 1 | 1 |   |
| 2 | Weishi | 2 | 694 | 57 | 2 | 1 | 1 |   |
| 2 | Weishi | 2 | 695 | 58 | 2 | 2 | 1 |   |
| 2 | Weishi | 2 | 696 | 79 | 3 | 1 | 1 | 1 |
| 2 | Weishi | 2 | 697 | 75 | 3 | 1 | 1 |   |
| 2 | Weishi | 2 | 698 | 55 | 2 | 1 | 1 |   |
| 2 | Weishi | 2 | 699 | 24 | 2 | 1 | 1 | 1 |
| 2 | Weishi | 2 | 700 | 66 | 3 | 1 | 1 |   |
| 2 | Weishi | 2 | 701 | 59 | 2 | 2 | 1 |   |
| 2 | Weishi | 2 | 702 | 65 | 3 | 1 | 1 |   |
| 2 | Weishi | 2 | 703 | 45 | 2 | 2 | 1 |   |
| 2 | Weishi | 2 | 704 | 83 | 3 | 1 | 1 |   |
| 2 | Weishi | 2 | 705 | 29 | 2 | 1 | 1 | 1 |
| 2 | Weishi | 2 | 706 | 76 | 3 | 2 | 1 |   |
| 2 | Weishi | 2 | 707 | 69 | 3 | 2 | 1 |   |
| 2 | Weishi | 2 | 708 | 67 | 3 | 1 | 1 |   |
| 2 | Weishi | 2 | 709 | 81 | 3 | 1 | 1 |   |
| 2 | Weishi | 2 | 710 | 50 | 2 | 1 | 1 |   |
| 2 | Weishi | 2 | 711 | 61 | 2 | 1 | 1 |   |
| 2 | Weishi | 2 | 712 | 59 | 2 | 1 | 1 |   |
| 2 | Weishi | 2 | 713 | 68 | 3 | 1 | 1 |   |
| 2 | Weishi | 2 | 714 | 47 | 2 | 2 | 1 |   |
| 2 | Weishi | 2 | 715 | 94 | 3 | 2 | 1 |   |
| 2 | Weishi | 2 | 716 | 35 | 2 | 1 | 1 |   |
| 2 | Weishi | 2 | 717 | 70 | 3 | 1 | 1 |   |
| 2 | Weishi | 2 | 718 | 56 | 2 | 2 | 1 |   |
| 2 | Weishi | 2 | 719 | 64 | 2 | 2 | 1 |   |
| 2 | Weishi | 2 | 720 | 80 | 3 | 1 | 1 |   |
| 2 | Weishi | 2 | 721 | 57 | 2 | 1 | 1 |   |
| 2 | Weishi | 2 | 722 | 63 | 2 | 1 | 1 |   |
| 2 | Weishi | 2 | 723 | 85 | 3 | 1 | 1 | 1 |

|   |        |   |     |    |   |   |   |   |
|---|--------|---|-----|----|---|---|---|---|
| 2 | Weishi | 2 | 724 | 80 | 3 | 1 | 1 |   |
| 2 | Weishi | 2 | 725 | 25 | 2 | 1 | 1 |   |
| 2 | Weishi | 2 | 726 | 51 | 2 | 1 | 1 | 1 |
| 2 | Weishi | 2 | 727 | 62 | 2 | 2 | 1 | 1 |
| 2 | Weishi | 2 | 728 | 86 | 3 | 2 | 1 |   |
| 2 | Weishi | 2 | 729 | 24 | 2 | 1 |   | 1 |
| 2 | Weishi | 2 | 730 | 85 | 3 | 1 | 1 |   |
| 2 | Weishi | 2 | 731 | 88 | 3 | 2 |   | 1 |
| 2 | Weishi | 2 | 732 | 62 | 2 | 2 | 1 |   |
| 2 | Weishi | 2 | 733 | 51 | 2 | 1 | 1 |   |
| 2 | Weishi | 2 | 734 | 28 | 2 | 1 | 1 |   |
| 2 | Weishi | 2 | 735 | 45 | 2 | 1 | 1 |   |
| 2 | Weishi | 2 | 736 | 30 | 2 | 1 | 1 |   |
| 2 | Weishi | 2 | 737 | 70 | 3 | 2 | 1 |   |
| 2 | Weishi | 2 | 738 | 70 | 3 | 2 |   | 1 |
| 2 | Weishi | 2 | 739 | 68 | 3 | 1 | 1 |   |
| 2 | Weishi | 2 | 740 | 76 | 3 | 2 | 1 |   |
| 2 | Weishi | 2 | 741 | 29 | 2 | 2 |   | 1 |
| 2 | Weishi | 2 | 742 | 54 | 2 | 2 |   | 1 |
| 2 | Weishi | 2 | 743 | 29 | 2 | 1 | 1 |   |
| 2 | Weishi | 2 | 744 | 7  | 1 | 2 | 1 |   |
| 2 | Weishi | 2 | 745 | 75 | 3 | 2 | 1 |   |
| 2 | Weishi | 2 | 746 | 46 | 2 | 1 | 1 |   |
| 2 | Weishi | 2 | 747 | 36 | 2 | 1 | 1 |   |
| 2 | Weishi | 2 | 748 | 80 | 3 | 2 | 1 |   |
| 2 | Weishi | 2 | 749 | 62 | 2 | 1 | 1 |   |
| 2 | Weishi | 2 | 750 | 46 | 2 | 1 | 1 |   |
| 2 | Weishi | 2 | 751 | 46 | 2 | 1 | 1 |   |
| 2 | Weishi | 2 | 752 | 28 | 2 | 2 | 1 |   |
| 2 | Weishi | 2 | 753 | 69 | 3 | 1 |   | 1 |
| 2 | Weishi | 2 | 754 | 64 | 2 | 2 | 1 |   |
| 2 | Weishi | 2 | 755 | 87 | 3 | 2 | 1 |   |
| 2 | Weishi | 2 | 756 | 54 | 2 | 2 | 1 |   |
| 2 | Weishi | 2 | 757 | 20 | 2 | 2 | 1 |   |
| 2 | Weishi | 2 | 758 | 87 | 3 | 1 | 1 |   |
| 2 | Weishi | 2 | 759 | 72 | 3 | 1 | 1 |   |
| 2 | Weishi | 2 | 760 | 35 | 2 | 1 | 1 |   |
| 2 | Weishi | 2 | 761 | 61 | 2 | 1 | 2 |   |
| 2 | Weishi | 2 | 762 | 58 | 2 | 1 | 2 |   |
| 2 | Weishi | 2 | 763 | 81 | 3 | 1 | 2 |   |
| 2 | Weishi | 2 | 764 | 16 | 2 | 1 | 2 |   |
| 2 | Weishi | 2 | 765 | 43 | 2 | 2 | 2 |   |
| 2 | Weishi | 2 | 766 | 79 | 3 | 1 | 2 |   |
| 2 | Weishi | 2 | 767 | 77 | 3 | 1 | 2 |   |
| 2 | Weishi | 2 | 768 | 68 | 3 | 1 | 2 |   |
| 2 | Weishi | 2 | 769 | 82 | 3 | 2 | 2 |   |
| 2 | Weishi | 2 | 770 | 74 | 3 | 2 | 2 |   |
| 2 | Weishi | 2 | 771 | 45 | 2 | 2 | 2 |   |
| 2 | Weishi | 2 | 772 | 27 | 2 | 1 | 2 |   |
| 2 | Weishi | 2 | 773 | 65 | 3 | 2 | 2 |   |
| 2 | Weishi | 2 | 774 | 57 | 2 | 1 | 2 |   |
| 2 | Weishi | 2 | 775 | 64 | 2 | 1 | 2 |   |
| 2 | Weishi | 2 | 776 | 65 | 3 | 1 | 2 |   |
| 2 | Weishi | 2 | 777 | 73 | 3 | 1 | 2 |   |

|   |        |   |     |    |   |   |   |  |
|---|--------|---|-----|----|---|---|---|--|
| 2 | Weishi | 2 | 778 | 29 | 2 | 1 | 2 |  |
| 2 | Weishi | 2 | 779 | 48 | 2 | 1 | 2 |  |
| 2 | Weishi | 2 | 780 | 14 | 1 | 1 | 2 |  |
| 2 | Weishi | 2 | 781 | 30 | 2 | 1 | 2 |  |
| 2 | Weishi | 2 | 782 | 46 | 2 | 2 | 2 |  |
| 2 | Weishi | 2 | 783 | 29 | 2 | 2 | 2 |  |
| 2 | Weishi | 2 | 784 | 50 | 2 | 1 | 2 |  |
| 2 | Weishi | 2 | 785 | 44 | 2 | 1 | 2 |  |
| 2 | Weishi | 2 | 786 | 62 | 2 | 1 | 2 |  |
| 2 | Weishi | 2 | 787 | 72 | 3 | 1 | 2 |  |
| 2 | Weishi | 2 | 788 | 80 | 3 | 1 | 2 |  |
| 2 | Weishi | 2 | 789 | 80 | 3 | 2 | 2 |  |
| 2 | Weishi | 2 | 790 | 50 | 2 | 1 | 2 |  |
| 2 | Weishi | 2 | 791 | 61 | 2 | 2 | 2 |  |
| 2 | Weishi | 2 | 792 | 49 | 2 | 2 | 2 |  |
| 2 | Weishi | 2 | 793 | 70 | 3 | 1 | 2 |  |
| 2 | Weishi | 2 | 794 | 64 | 2 | 1 | 2 |  |
| 2 | Weishi | 2 | 795 | 79 | 3 | 1 | 2 |  |
| 2 | Weishi | 2 | 796 | 52 | 2 | 1 | 2 |  |
| 2 | Weishi | 2 | 797 | 46 | 2 | 1 | 2 |  |
| 2 | Weishi | 2 | 798 | 43 | 2 | 2 | 2 |  |
| 2 | Weishi | 2 | 799 | 44 | 2 | 1 | 2 |  |
| 2 | Weishi | 2 | 800 | 13 | 1 | 1 | 2 |  |
| 2 | Weishi | 2 | 801 | 34 | 2 | 2 | 2 |  |
| 2 | Weishi | 2 | 802 | 52 | 2 | 2 | 2 |  |
| 2 | Weishi | 2 | 803 | 83 | 3 | 1 | 2 |  |
| 2 | Weishi | 2 | 804 | 75 | 3 | 1 | 2 |  |
| 2 | Weishi | 2 | 805 | 78 | 3 | 1 | 2 |  |
| 2 | Weishi | 2 | 806 | 36 | 2 | 1 | 2 |  |
| 2 | Weishi | 2 | 807 | 80 | 3 | 1 | 2 |  |
| 2 | Weishi | 2 | 808 | 59 | 2 | 1 | 2 |  |
| 2 | Weishi | 2 | 809 | 62 | 2 | 1 | 2 |  |
| 2 | Weishi | 2 | 810 | 51 | 2 | 1 | 2 |  |
| 2 | Weishi | 2 | 811 | 76 | 3 | 1 | 2 |  |
| 2 | Weishi | 2 | 812 | 52 | 2 | 2 | 2 |  |
| 2 | Weishi | 2 | 813 | 78 | 3 | 1 | 2 |  |
| 2 | Weishi | 2 | 814 | 66 | 3 | 1 | 2 |  |
| 2 | Weishi | 2 | 815 | 46 | 2 | 2 | 2 |  |
| 2 | Weishi | 2 | 816 | 68 | 3 | 1 | 2 |  |
| 2 | Weishi | 2 | 817 | 51 | 2 | 1 | 2 |  |
| 2 | Weishi | 2 | 818 | 12 | 1 | 2 | 2 |  |
| 2 | Weishi | 2 | 819 | 48 | 2 | 1 | 2 |  |
| 2 | Weishi | 2 | 820 | 15 | 2 | 1 | 2 |  |
| 2 | Weishi | 2 | 821 | 49 | 2 | 1 | 2 |  |
| 2 | Weishi | 2 | 822 | 45 | 2 | 2 | 2 |  |
| 2 | Weishi | 2 | 823 | 63 | 2 | 1 | 2 |  |
| 2 | Weishi | 2 | 824 | 17 | 2 | 2 | 2 |  |
| 2 | Weishi | 2 | 825 | 71 | 3 | 1 | 2 |  |
| 2 | Weishi | 2 | 826 | 44 | 2 | 2 | 2 |  |
| 2 | Weishi | 2 | 827 | 72 | 3 | 1 | 2 |  |
| 2 | Weishi | 2 | 828 | 66 | 3 | 1 | 2 |  |
| 2 | Weishi | 2 | 829 | 48 | 2 | 1 | 2 |  |
| 2 | Weishi | 2 | 830 | 50 | 2 | 1 | 2 |  |
| 2 | Weishi | 2 | 831 | 80 | 3 | 2 | 2 |  |



|   |        |   |     |    |   |   |   |  |
|---|--------|---|-----|----|---|---|---|--|
| 2 | Weishi | 2 | 832 | 57 | 2 | 1 | 2 |  |
| 2 | Weishi | 2 | 833 | 70 | 3 | 1 | 2 |  |
| 2 | Weishi | 2 | 834 | 44 | 2 | 1 | 2 |  |
| 2 | Weishi | 2 | 835 | 78 | 3 | 1 | 2 |  |
| 2 | Weishi | 2 | 836 | 77 | 3 | 1 | 2 |  |
| 2 | Weishi | 2 | 837 | 68 | 3 | 1 | 2 |  |
| 2 | Weishi | 2 | 838 | 73 | 3 | 1 | 2 |  |
| 2 | Weishi | 2 | 839 | 71 | 3 | 1 | 2 |  |
| 2 | Weishi | 2 | 840 | 80 | 3 | 1 | 2 |  |
| 2 | Weishi | 2 | 841 | 61 | 2 | 2 | 2 |  |
| 2 | Weishi | 2 | 842 | 86 | 3 | 1 | 2 |  |
| 2 | Weishi | 2 | 843 | 66 | 3 | 1 | 2 |  |
| 2 | Weishi | 2 | 844 | 72 | 3 | 2 | 2 |  |
| 2 | Weishi | 2 | 845 | 66 | 3 | 1 | 2 |  |
| 2 | Weishi | 2 | 846 | 30 | 2 | 1 | 2 |  |
| 2 | Weishi | 2 | 847 | 76 | 3 | 1 | 2 |  |
| 2 | Weishi | 2 | 848 | 75 | 3 | 1 | 2 |  |
| 2 | Weishi | 2 | 849 | 63 | 2 | 2 | 2 |  |
| 2 | Weishi | 2 | 850 | 32 | 2 | 1 | 2 |  |
| 2 | Weishi | 2 | 851 | 62 | 2 | 1 | 2 |  |
| 2 | Weishi | 2 | 852 | 48 | 2 | 2 | 2 |  |
| 2 | Weishi | 2 | 853 | 47 | 2 | 1 | 2 |  |
| 2 | Weishi | 2 | 854 | 26 | 2 | 1 | 2 |  |
| 2 | Weishi | 2 | 855 | 32 | 2 | 1 | 2 |  |
| 2 | Weishi | 2 | 856 | 74 | 3 | 1 | 2 |  |
| 2 | Weishi | 2 | 857 | 64 | 2 | 2 | 2 |  |
| 2 | Weishi | 2 | 858 | 59 | 2 | 1 | 2 |  |
| 2 | Weishi | 2 | 859 | 52 | 2 | 2 | 2 |  |
| 2 | Weishi | 2 | 860 | 59 | 2 | 1 | 2 |  |
| 2 | Weishi | 2 | 861 | 30 | 2 | 1 | 2 |  |
| 2 | Weishi | 2 | 862 | 46 | 2 | 1 | 2 |  |
| 2 | Weishi | 2 | 863 | 25 | 2 | 1 | 2 |  |
| 2 | Weishi | 2 | 864 | 41 | 2 | 2 | 2 |  |
| 2 | Weishi | 2 | 865 | 26 | 2 | 1 | 2 |  |
| 2 | Weishi | 2 | 866 | 52 | 2 | 1 | 2 |  |
| 2 | Weishi | 2 | 867 | 42 | 2 | 1 | 2 |  |
| 2 | Weishi | 2 | 868 | 32 | 2 | 2 | 2 |  |
| 2 | Weishi | 2 | 869 | 18 | 2 | 1 | 2 |  |
| 2 | Weishi | 2 | 870 | 53 | 2 | 1 | 2 |  |
| 2 | Weishi | 2 | 871 | 60 | 2 | 1 | 2 |  |
| 2 | Weishi | 2 | 872 | 44 | 2 | 1 | 2 |  |
| 2 | Weishi | 2 | 873 | 59 | 2 | 1 | 2 |  |
| 2 | Weishi | 2 | 874 | 44 | 2 | 2 | 2 |  |
| 2 | Weishi | 2 | 875 | 41 | 2 | 1 | 2 |  |
| 2 | Weishi | 2 | 876 | 22 | 2 | 1 | 2 |  |
| 2 | Weishi | 2 | 877 | 30 | 2 | 2 | 2 |  |
| 2 | Weishi | 2 | 878 | 75 | 3 | 1 | 2 |  |
| 2 | Weishi | 2 | 879 | 83 | 3 | 1 | 2 |  |
| 2 | Weishi | 2 | 880 | 55 | 2 | 2 | 2 |  |
| 2 | Weishi | 2 | 881 | 61 | 2 | 2 | 2 |  |
| 2 | Weishi | 2 | 882 | 70 | 3 | 1 | 2 |  |
| 2 | Weishi | 2 | 883 | 71 | 3 | 2 | 2 |  |
| 2 | Weishi | 2 | 884 | 77 | 3 | 1 | 2 |  |
| 2 | Weishi | 2 | 885 | 79 | 3 | 2 | 2 |  |

|   |        |   |     |    |   |   |   |  |
|---|--------|---|-----|----|---|---|---|--|
| 2 | Weishi | 2 | 886 | 55 | 2 | 1 | 2 |  |
| 2 | Weishi | 2 | 887 | 81 | 3 | 1 | 2 |  |
| 2 | Weishi | 2 | 888 | 70 | 3 | 2 | 2 |  |
| 2 | Weishi | 2 | 889 | 80 | 3 | 2 | 2 |  |
| 2 | Weishi | 2 | 890 | 58 | 2 | 1 | 2 |  |
| 2 | Weishi | 2 | 891 | 27 | 2 | 1 | 2 |  |
| 2 | Weishi | 2 | 892 | 83 | 3 | 2 | 2 |  |
| 2 | Weishi | 2 | 893 | 21 | 2 | 1 | 2 |  |
| 2 | Weishi | 2 | 894 | 28 | 2 | 2 | 2 |  |
| 2 | Weishi | 2 | 895 | 82 | 3 | 1 | 2 |  |
| 2 | Weishi | 2 | 896 | 76 | 3 | 1 | 2 |  |
| 2 | Weishi | 2 | 897 | 66 | 3 | 1 | 2 |  |
| 2 | Weishi | 2 | 898 | 58 | 2 | 2 | 2 |  |
| 2 | Weishi | 2 | 899 | 26 | 2 | 1 | 2 |  |
| 2 | Weishi | 2 | 900 | 25 | 2 | 1 | 2 |  |
| 2 | Weishi | 2 | 901 | 67 | 3 | 2 | 2 |  |
| 2 | Weishi | 2 | 902 | 16 | 2 | 1 | 2 |  |
| 2 | Weishi | 2 | 903 | 53 | 2 | 1 | 2 |  |
| 2 | Weishi | 2 | 904 | 76 | 3 | 2 | 2 |  |
| 2 | Weishi | 2 | 905 | 27 | 2 | 1 | 2 |  |
| 2 | Weishi | 2 | 906 | 23 | 2 | 1 | 2 |  |
| 2 | Weishi | 2 | 907 | 66 | 3 | 1 | 2 |  |
| 2 | Weishi | 2 | 908 | 66 | 3 | 1 | 2 |  |
| 2 | Weishi | 2 | 909 | 27 | 2 | 1 | 2 |  |
| 2 | Weishi | 2 | 910 | 62 | 2 | 1 | 2 |  |
| 2 | Weishi | 2 | 911 | 55 | 2 | 1 | 2 |  |
| 2 | Weishi | 2 | 912 | 67 | 3 | 1 | 2 |  |
| 2 | Weishi | 2 | 913 | 29 | 2 | 1 | 2 |  |
| 2 | Weishi | 2 | 914 | 16 | 2 | 1 | 2 |  |
| 2 | Weishi | 2 | 915 | 17 | 2 | 1 | 2 |  |
| 2 | Weishi | 2 | 916 | 78 | 3 | 2 | 2 |  |
| 2 | Weishi | 2 | 917 | 64 | 2 | 1 | 2 |  |
| 2 | Weishi | 2 | 918 | 82 | 3 | 1 | 2 |  |
| 2 | Weishi | 2 | 919 | 84 | 3 | 1 | 2 |  |
| 2 | Weishi | 2 | 920 | 30 | 2 | 1 | 2 |  |
| 2 | Weishi | 2 | 921 | 41 | 2 | 2 | 2 |  |
| 2 | Weishi | 2 | 922 | 73 | 3 | 1 | 2 |  |
| 2 | Weishi | 2 | 923 | 71 | 3 | 1 | 2 |  |
| 2 | Weishi | 2 | 924 | 86 | 3 | 1 | 2 |  |
| 2 | Weishi | 2 | 925 | 60 | 2 | 1 | 2 |  |
| 2 | Weishi | 2 | 926 | 70 | 3 | 1 | 2 |  |
| 2 | Weishi | 2 | 927 | 70 | 3 | 1 | 2 |  |
| 2 | Weishi | 2 | 928 | 51 | 2 | 2 | 2 |  |
| 2 | Weishi | 2 | 929 | 66 | 3 | 1 | 2 |  |
| 2 | Weishi | 2 | 930 | 75 | 3 | 1 | 2 |  |
| 2 | Weishi | 2 | 931 | 69 | 3 | 2 | 2 |  |
| 2 | Weishi | 2 | 932 | 65 | 3 | 2 | 2 |  |
| 2 | Weishi | 2 | 933 | 28 | 2 | 1 | 2 |  |
| 2 | Weishi | 2 | 934 | 66 | 3 | 1 | 2 |  |
| 2 | Weishi | 2 | 935 | 27 | 2 | 1 | 2 |  |
| 2 | Weishi | 2 | 936 | 26 | 2 | 1 | 2 |  |
| 2 | Weishi | 2 | 937 | 85 | 3 | 1 | 2 |  |
| 2 | Weishi | 2 | 938 | 59 | 2 | 1 | 2 |  |
| 2 | Weishi | 2 | 939 | 64 | 2 | 1 | 2 |  |

|   |        |   |     |    |   |   |   |  |
|---|--------|---|-----|----|---|---|---|--|
| 2 | Weishi | 2 | 940 | 25 | 2 | 1 | 2 |  |
| 2 | Weishi | 2 | 941 | 82 | 3 | 2 | 2 |  |
| 2 | Weishi | 2 | 942 | 44 | 2 | 1 | 2 |  |
| 2 | Weishi | 2 | 943 | 70 | 3 | 1 | 2 |  |
| 2 | Weishi | 2 | 944 | 78 | 3 | 1 | 2 |  |
| 2 | Weishi | 2 | 945 | 83 | 3 | 1 | 2 |  |
| 2 | Weishi | 2 | 946 | 57 | 2 | 1 | 2 |  |
| 2 | Weishi | 2 | 947 | 86 | 3 | 2 | 2 |  |
| 2 | Weishi | 2 | 948 | 60 | 2 | 1 | 2 |  |
| 2 | Weishi | 2 | 949 | 63 | 2 | 2 | 2 |  |
| 2 | Weishi | 2 | 950 | 29 | 2 | 2 | 2 |  |
| 2 | Weishi | 2 | 951 | 30 | 2 | 1 | 2 |  |
| 2 | Weishi | 2 | 952 | 49 | 2 | 1 | 2 |  |
| 2 | Weishi | 2 | 953 | 85 | 3 | 1 | 2 |  |
| 2 | Weishi | 2 | 954 | 28 | 2 | 2 | 2 |  |
| 2 | Weishi | 2 | 955 | 47 | 2 | 1 | 2 |  |
| 2 | Weishi | 2 | 956 | 62 | 2 | 1 | 2 |  |
| 2 | Weishi | 2 | 957 | 43 | 2 | 2 | 2 |  |
| 2 | Weishi | 2 | 958 | 73 | 3 | 1 | 2 |  |
| 2 | Weishi | 2 | 959 | 79 | 3 | 2 | 2 |  |
| 2 | Weishi | 2 | 960 | 77 | 3 | 1 | 2 |  |
| 2 | Weishi | 2 | 961 | 28 | 2 | 1 | 2 |  |
| 2 | Weishi | 2 | 962 | 25 | 2 | 1 | 2 |  |
| 2 | Weishi | 2 | 963 | 26 | 2 | 2 | 2 |  |
| 2 | Weishi | 2 | 964 | 37 | 2 | 2 | 2 |  |
| 2 | Weishi | 2 | 965 | 48 | 2 | 1 | 2 |  |
| 2 | Weishi | 2 | 966 | 65 | 3 | 1 | 2 |  |
| 2 | Weishi | 2 | 967 | 80 | 3 | 2 | 2 |  |
| 2 | Weishi | 2 | 968 | 74 | 3 | 1 | 2 |  |
| 2 | Weishi | 2 | 969 | 64 | 2 | 1 | 2 |  |
| 2 | Weishi | 2 | 970 | 66 | 3 | 1 | 2 |  |
| 2 | Weishi | 2 | 971 | 17 | 2 | 1 | 2 |  |
| 2 | Weishi | 2 | 972 | 77 | 3 | 2 | 2 |  |
| 2 | Weishi | 2 | 973 | 77 | 3 | 2 | 2 |  |
| 2 | Weishi | 2 | 974 | 31 | 2 | 1 | 2 |  |
| 2 | Weishi | 2 | 975 | 36 | 2 | 2 | 2 |  |
| 2 | Weishi | 2 | 976 | 78 | 3 | 2 | 2 |  |
| 2 | Weishi | 2 | 977 | 27 | 2 | 1 | 2 |  |
| 2 | Weishi | 2 | 978 | 78 | 3 | 2 | 2 |  |
| 2 | Weishi | 2 | 979 | 58 | 2 | 1 | 2 |  |
| 2 | Weishi | 2 | 980 | 60 | 2 | 1 | 2 |  |
| 2 | Weishi | 2 | 981 | 52 | 2 | 1 | 2 |  |
| 2 | Weishi | 2 | 982 | 45 | 2 | 1 | 2 |  |
| 2 | Weishi | 2 | 983 | 63 | 2 | 1 | 2 |  |
| 2 | Weishi | 2 | 984 | 23 | 2 | 1 | 2 |  |
| 2 | Weishi | 2 | 985 | 71 | 3 | 1 | 2 |  |
| 2 | Weishi | 2 | 986 | 51 | 2 | 1 | 2 |  |
| 2 | Weishi | 2 | 987 | 27 | 2 | 2 | 2 |  |
| 2 | Weishi | 2 | 988 | 66 | 3 | 1 | 2 |  |
| 2 | Weishi | 2 | 989 | 71 | 3 | 1 | 2 |  |
| 2 | Weishi | 2 | 990 | 49 | 2 | 1 | 2 |  |
| 2 | Weishi | 2 | 991 | 28 | 2 | 1 | 2 |  |
| 2 | Weishi | 2 | 992 | 37 | 2 | 2 | 2 |  |
| 2 | Weishi | 2 | 993 | 71 | 3 | 1 | 2 |  |

|   |        |   |      |    |   |   |   |  |
|---|--------|---|------|----|---|---|---|--|
| 2 | Weishi | 2 | 994  | 70 | 3 | 1 | 2 |  |
| 2 | Weishi | 2 | 995  | 69 | 3 | 1 | 2 |  |
| 2 | Weishi | 2 | 996  | 66 | 3 | 1 | 2 |  |
| 2 | Weishi | 2 | 997  | 70 | 3 | 2 | 2 |  |
| 2 | Weishi | 2 | 998  | 60 | 2 | 2 | 2 |  |
| 2 | Weishi | 2 | 999  | 62 | 2 | 2 | 2 |  |
| 2 | Weishi | 2 | 1000 | 25 | 2 | 1 | 2 |  |
| 2 | Weishi | 2 | 1001 | 45 | 2 | 2 | 2 |  |
| 2 | Weishi | 2 | 1002 | 78 | 3 | 2 | 2 |  |
| 2 | Weishi | 2 | 1003 | 44 | 2 | 1 | 2 |  |
| 2 | Weishi | 2 | 1004 | 67 | 3 | 1 | 2 |  |
| 2 | Weishi | 2 | 1005 | 60 | 2 | 1 | 2 |  |
| 2 | Weishi | 2 | 1006 | 67 | 3 | 1 | 2 |  |
| 2 | Weishi | 2 | 1007 | 61 | 2 | 2 | 2 |  |
| 2 | Weishi | 2 | 1008 | 60 | 2 | 2 | 2 |  |
| 2 | Weishi | 2 | 1009 | 19 | 2 | 1 | 2 |  |
| 2 | Weishi | 2 | 1010 | 36 | 2 | 1 | 2 |  |
| 2 | Weishi | 2 | 1011 | 24 | 2 | 2 | 2 |  |
| 2 | Weishi | 2 | 1012 | 51 | 2 | 2 | 2 |  |
| 2 | Weishi | 2 | 1013 | 80 | 3 | 2 | 2 |  |
| 2 | Weishi | 2 | 1014 | 74 | 3 | 1 | 2 |  |
| 2 | Weishi | 2 | 1015 | 68 | 3 | 1 | 2 |  |
| 2 | Weishi | 2 | 1016 | 70 | 3 | 1 | 2 |  |
| 2 | Weishi | 2 | 1017 | 38 | 2 | 2 | 2 |  |
| 2 | Weishi | 2 | 1018 | 66 | 3 | 1 | 2 |  |
| 2 | Weishi | 2 | 1019 | 80 | 3 | 2 | 2 |  |
| 2 | Weishi | 2 | 1020 | 70 | 3 | 1 | 2 |  |
| 2 | Weishi | 2 | 1021 | 55 | 2 | 1 | 2 |  |
| 2 | Weishi | 2 | 1022 | 43 | 2 | 1 | 2 |  |
| 2 | Weishi | 2 | 1023 | 73 | 3 | 1 | 2 |  |
| 2 | Weishi | 2 | 1024 | 64 | 2 | 1 | 2 |  |
| 2 | Weishi | 2 | 1025 | 43 | 2 | 2 | 2 |  |
| 2 | Weishi | 2 | 1026 | 80 | 3 | 1 | 2 |  |
| 2 | Weishi | 2 | 1027 | 78 | 3 | 1 | 2 |  |
| 2 | Weishi | 2 | 1028 | 60 | 2 | 1 | 2 |  |
| 2 | Weishi | 2 | 1029 | 56 | 2 | 2 | 2 |  |
| 2 | Weishi | 2 | 1030 | 80 | 3 | 2 | 2 |  |
| 2 | Weishi | 2 | 1031 | 24 | 2 | 2 | 2 |  |
| 2 | Weishi | 2 | 1032 | 56 | 2 | 1 | 2 |  |
| 2 | Weishi | 2 | 1033 | 68 | 3 | 1 | 2 |  |
| 2 | Weishi | 2 | 1034 | 62 | 2 | 1 | 2 |  |
| 2 | Weishi | 2 | 1035 | 66 | 3 | 1 | 2 |  |
| 2 | Weishi | 2 | 1036 | 27 | 2 | 1 | 2 |  |
| 2 | Weishi | 2 | 1037 | 62 | 2 | 2 | 2 |  |
| 2 | Weishi | 2 | 1038 | 61 | 2 | 1 | 2 |  |
| 2 | Weishi | 2 | 1039 | 68 | 3 | 1 | 2 |  |
| 2 | Weishi | 2 | 1040 | 20 | 2 | 1 | 2 |  |
| 2 | Weishi | 2 | 1041 | 73 | 3 | 1 | 2 |  |
| 2 | Weishi | 2 | 1042 | 82 | 3 | 1 | 2 |  |
| 2 | Weishi | 2 | 1043 | 25 | 2 | 2 | 2 |  |
| 2 | Weishi | 2 | 1044 | 52 | 2 | 2 | 2 |  |
| 2 | Weishi | 2 | 1045 | 48 | 2 | 2 | 2 |  |
| 2 | Weishi | 2 | 1046 | 48 | 2 | 2 | 2 |  |
| 2 | Weishi | 2 | 1047 | 68 | 3 | 1 | 2 |  |

|   |        |   |      |    |   |   |   |  |
|---|--------|---|------|----|---|---|---|--|
| 2 | Weishi | 2 | 1048 | 24 | 2 | 1 | 2 |  |
| 2 | Weishi | 2 | 1049 | 65 | 3 | 1 | 2 |  |
| 2 | Weishi | 2 | 1050 | 77 | 3 | 2 | 2 |  |
| 2 | Weishi | 2 | 1051 | 81 | 3 | 2 | 2 |  |
| 2 | Weishi | 2 | 1052 | 74 | 3 | 2 | 2 |  |
| 2 | Weishi | 2 | 1053 | 64 | 2 | 1 | 2 |  |
| 2 | Weishi | 2 | 1054 | 63 | 2 | 2 | 2 |  |
| 2 | Weishi | 2 | 1055 | 52 | 2 | 2 | 2 |  |
| 2 | Weishi | 2 | 1056 | 66 | 3 | 1 | 2 |  |
| 2 | Weishi | 2 | 1057 | 47 | 2 | 1 | 2 |  |
| 2 | Weishi | 2 | 1058 | 51 | 2 | 1 | 2 |  |
| 2 | Weishi | 2 | 1059 | 43 | 2 | 2 | 2 |  |
| 2 | Weishi | 2 | 1060 | 25 | 2 | 2 | 2 |  |
| 2 | Weishi | 2 | 1061 | 80 | 3 | 1 | 2 |  |
| 2 | Weishi | 2 | 1062 | 65 | 3 | 1 | 2 |  |
| 2 | Weishi | 2 | 1063 | 57 | 2 | 1 | 2 |  |
| 2 | Weishi | 2 | 1064 | 25 | 2 | 2 | 2 |  |
| 2 | Weishi | 2 | 1065 | 58 | 2 | 1 | 2 |  |
| 2 | Weishi | 2 | 1066 | 30 | 2 | 1 | 2 |  |
| 2 | Weishi | 2 | 1067 | 25 | 2 | 2 | 2 |  |
| 2 | Weishi | 2 | 1068 | 57 | 2 | 1 | 2 |  |
| 2 | Weishi | 2 | 1069 | 79 | 3 | 1 | 2 |  |
| 2 | Weishi | 2 | 1070 | 61 | 2 | 2 | 2 |  |
| 2 | Weishi | 2 | 1071 | 61 | 2 | 2 | 2 |  |
| 2 | Weishi | 2 | 1072 | 27 | 2 | 1 | 2 |  |
| 2 | Weishi | 2 | 1073 | 58 | 2 | 1 | 2 |  |
| 2 | Weishi | 2 | 1074 | 50 | 2 | 2 | 2 |  |
| 2 | Weishi | 2 | 1075 | 29 | 2 | 1 | 2 |  |
| 2 | Weishi | 2 | 1076 | 64 | 2 | 1 | 2 |  |
| 2 | Weishi | 2 | 1077 | 47 | 2 | 1 | 2 |  |
| 2 | Weishi | 2 | 1078 | 71 | 3 | 1 | 2 |  |
| 2 | Weishi | 2 | 1079 | 72 | 3 | 1 | 2 |  |
| 2 | Weishi | 2 | 1080 | 13 | 1 | 1 | 2 |  |
| 2 | Weishi | 2 | 1081 | 74 | 3 | 1 | 2 |  |
| 2 | Weishi | 2 | 1082 | 37 | 2 | 1 | 2 |  |
| 2 | Weishi | 2 | 1083 | 56 | 2 | 1 | 2 |  |
| 2 | Weishi | 2 | 1084 | 70 | 3 | 1 | 2 |  |
| 2 | Weishi | 2 | 1085 | 46 | 2 | 2 | 2 |  |
| 2 | Weishi | 2 | 1086 | 65 | 3 | 1 | 2 |  |
| 2 | Weishi | 2 | 1087 | 18 | 2 | 2 | 2 |  |
| 2 | Weishi | 2 | 1088 | 60 | 2 | 1 | 2 |  |
| 2 | Weishi | 2 | 1089 | 17 | 2 | 2 | 2 |  |
| 2 | Weishi | 2 | 1090 | 62 | 2 | 1 | 2 |  |
| 2 | Weishi | 2 | 1091 | 56 | 2 | 1 | 2 |  |
| 2 | Weishi | 2 | 1092 | 16 | 2 | 2 | 2 |  |
| 2 | Weishi | 2 | 1093 | 69 | 3 | 1 | 2 |  |
| 2 | Weishi | 2 | 1094 | 67 | 3 | 1 | 2 |  |
| 2 | Weishi | 2 | 1095 | 71 | 3 | 2 | 2 |  |
| 2 | Weishi | 2 | 1096 | 73 | 3 | 1 | 2 |  |
| 2 | Weishi | 2 | 1097 | 40 | 2 | 1 | 2 |  |
| 2 | Weishi | 2 | 1098 | 27 | 2 | 2 | 2 |  |
| 2 | Weishi | 2 | 1099 | 61 | 2 | 2 | 2 |  |
| 2 | Weishi | 2 | 1100 | 68 | 3 | 1 | 2 |  |
| 2 | Weishi | 2 | 1101 | 84 | 3 | 1 | 2 |  |

|   |         |   |      |    |   |   |   |   |
|---|---------|---|------|----|---|---|---|---|
| 2 | Weishi  | 2 | 1102 | 46 | 2 | 1 | 2 |   |
| 2 | Weishi  | 2 | 1103 | 73 | 3 | 1 | 2 |   |
| 2 | Weishi  | 2 | 1104 | 65 | 3 | 1 | 2 |   |
| 2 | Weishi  | 2 | 1105 | 25 | 2 | 1 | 2 |   |
| 2 | Weishi  | 2 | 1106 | 23 | 2 | 1 | 2 |   |
| 2 | Weishi  | 2 | 1107 | 86 | 3 | 1 | 2 |   |
| 2 | Weishi  | 2 | 1108 | 61 | 2 | 1 | 2 |   |
| 2 | Weishi  | 2 | 1109 | 19 | 2 | 2 | 2 |   |
| 2 | Weishi  | 2 | 1110 | 67 | 3 | 2 | 2 |   |
| 2 | Weishi  | 2 | 1111 | 52 | 2 | 1 | 2 |   |
| 2 | Weishi  | 2 | 1112 | 47 | 2 | 1 | 2 |   |
| 2 | Weishi  | 2 | 1113 | 82 | 3 | 2 | 2 |   |
| 2 | Weishi  | 2 | 1114 | 70 | 3 | 2 | 2 |   |
| 2 | Weishi  | 2 | 1115 | 18 | 2 | 1 | 2 |   |
| 2 | Weishi  | 2 | 1116 | 70 | 3 | 1 | 2 |   |
| 2 | Weishi  | 2 | 1117 | 77 | 3 | 1 | 2 |   |
| 2 | Weishi  | 2 | 1118 | 54 | 2 | 1 | 2 |   |
| 2 | Weishi  | 2 | 1119 | 25 | 2 | 1 | 2 |   |
| 2 | Weishi  | 2 | 1120 | 48 | 2 | 2 | 2 |   |
| 2 | Weishi  | 2 | 1121 | 70 | 3 | 1 | 2 |   |
| 2 | Weishi  | 2 | 1122 | 27 | 2 | 1 | 2 |   |
| 2 | Weishi  | 2 | 1123 | 30 | 2 | 1 |   | 1 |
| 2 | Weishi  | 2 | 1124 | 12 | 1 | 1 |   | 1 |
| 2 | Weishi  | 2 | 1125 | 51 | 2 | 1 | 1 |   |
| 2 | Weishi  | 2 | 1126 | 69 | 3 | 1 | 1 | 1 |
| 3 | Wuchang | 2 | 1127 | 53 | 2 | 2 |   | 1 |
| 3 | Wuchang | 2 | 1128 | 42 | 2 | 1 | 1 |   |
| 3 | Wuchang | 2 | 1129 | 69 | 3 | 2 |   | 1 |
| 3 | Wuchang | 2 | 1130 | 47 | 2 | 1 |   | 1 |
| 3 | Wuchang | 2 | 1131 | 59 | 2 | 1 | 1 |   |
| 3 | Wuchang | 2 | 1132 | 64 | 2 | 1 |   | 1 |
| 3 | Wuchang | 2 | 1133 | 53 | 2 | 1 |   | 1 |
| 3 | Wuchang | 2 | 1134 | 14 | 1 | 2 | 1 |   |
| 3 | Wuchang | 2 | 1135 | 55 | 2 | 1 |   | 1 |
| 3 | Wuchang | 2 | 1136 | 56 | 2 | 1 |   | 1 |
| 3 | Wuchang | 2 | 1137 | 45 | 2 | 2 |   | 1 |
| 3 | Wuchang | 2 | 1138 | 56 | 2 | 2 |   | 1 |
| 3 | Wuchang | 2 | 1139 | 48 | 2 | 2 |   | 1 |
| 3 | Wuchang | 2 | 1140 | 81 | 3 | 2 |   | 1 |
| 3 | Wuchang | 2 | 1141 | 42 | 2 | 1 | 1 |   |
| 3 | Wuchang | 2 | 1142 | 57 | 2 | 1 | 1 | 1 |
| 3 | Wuchang | 2 | 1143 | 56 | 2 | 1 | 1 | 1 |
| 3 | Wuchang | 2 | 1144 | 57 | 2 | 1 |   | 1 |
| 3 | Wuchang | 2 | 1145 | 69 | 3 | 2 |   | 1 |
| 3 | Wuchang | 2 | 1146 | 51 | 2 | 1 | 1 | 1 |
| 3 | Wuchang | 2 | 1147 | 52 | 2 | 1 |   | 1 |
| 3 | Wuchang | 2 | 1148 | 28 | 2 | 1 |   | 1 |
| 3 | Wuchang | 2 | 1149 | 53 | 2 | 1 |   | 1 |
| 3 | Wuchang | 2 | 1150 | 42 | 2 | 1 |   | 1 |
| 3 | Wuchang | 2 | 1151 | 65 | 3 | 2 |   | 1 |
| 3 | Wuchang | 2 | 1152 | 49 | 2 | 2 |   | 1 |
| 3 | Wuchang | 2 | 1153 | 63 | 2 | 1 |   | 1 |
| 3 | Wuchang | 2 | 1154 | 81 | 3 | 1 | 1 |   |
| 3 | Wuchang | 2 | 1155 | 19 | 2 | 1 |   | 1 |

|   |         |   |      |    |   |   |   |   |
|---|---------|---|------|----|---|---|---|---|
| 3 | Wuchang | 2 | 1156 | 85 | 3 | 1 |   | 1 |
| 3 | Wuchang | 2 | 1157 | 43 | 2 | 2 |   | 1 |
| 3 | Wuchang | 2 | 1158 | 56 | 2 | 2 |   | 1 |
| 3 | Wuchang | 2 | 1159 | 64 | 2 | 2 | 1 | 1 |
| 3 | Wuchang | 2 | 1160 | 20 | 2 | 2 | 1 |   |
| 3 | Wuchang | 2 | 1161 | 65 | 3 | 1 |   | 1 |
| 3 | Wuchang | 2 | 1162 | 69 | 3 | 1 | 1 | 1 |
| 3 | Wuchang | 2 | 1163 | 64 | 2 | 1 |   | 1 |
| 3 | Wuchang | 2 | 1164 | 30 | 2 | 2 |   | 1 |
| 3 | Wuchang | 2 | 1165 | 62 | 2 | 1 | 1 | 1 |
| 3 | Wuchang | 2 | 1166 | 38 | 2 | 2 |   | 1 |
| 3 | Wuchang | 2 | 1167 | 52 | 2 | 1 |   | 1 |
| 3 | Wuchang | 2 | 1168 | 61 | 2 | 1 |   | 1 |
| 3 | Wuchang | 2 | 1169 | 76 | 3 | 1 |   | 1 |
| 3 | Wuchang | 2 | 1170 | 40 | 2 | 1 | 1 |   |
| 3 | Wuchang | 2 | 1171 | 57 | 2 | 1 |   | 1 |
| 3 | Wuchang | 2 | 1172 | 62 | 2 | 1 |   | 1 |
| 3 | Wuchang | 2 | 1173 | 64 | 2 | 2 |   | 1 |
| 3 | Wuchang | 2 | 1174 | 51 | 2 | 1 |   | 1 |
| 3 | Wuchang | 2 | 1175 | 54 | 2 | 2 | 1 |   |
| 3 | Wuchang | 2 | 1176 | 62 | 2 | 1 |   | 1 |
| 3 | Wuchang | 2 | 1177 | 71 | 3 | 2 |   | 1 |
| 3 | Wuchang | 2 | 1178 | 25 | 2 | 1 | 1 |   |
| 3 | Wuchang | 2 | 1179 | 87 | 3 | 1 | 1 |   |
| 3 | Wuchang | 2 | 1180 | 46 | 2 | 2 | 1 |   |
| 3 | Wuchang | 2 | 1181 | 38 | 2 | 2 | 1 | 1 |
| 3 | Wuchang | 2 | 1182 | 52 | 2 | 1 |   | 1 |
| 3 | Wuchang | 2 | 1183 | 52 | 2 | 1 |   | 1 |
| 3 | Wuchang | 2 | 1184 | 64 | 2 | 1 |   | 1 |
| 3 | Wuchang | 2 | 1185 | 56 | 2 | 2 |   | 1 |
| 3 | Wuchang | 2 | 1186 | 37 | 2 | 1 | 1 | 1 |
| 3 | Wuchang | 2 | 1187 | 82 | 3 | 2 | 1 |   |
| 3 | Wuchang | 2 | 1188 | 73 | 3 | 2 |   | 1 |
| 3 | Wuchang | 2 | 1189 | 68 | 3 | 2 | 1 |   |
| 3 | Wuchang | 2 | 1190 | 42 | 2 | 2 | 1 |   |
| 3 | Wuchang | 2 | 1191 | 59 | 2 | 1 |   | 1 |
| 3 | Wuchang | 2 | 1192 | 52 | 2 | 1 |   | 1 |
| 3 | Wuchang | 2 | 1193 | 65 | 3 | 1 |   | 1 |
| 3 | Wuchang | 2 | 1194 | 76 | 3 | 1 |   | 1 |
| 3 | Wuchang | 2 | 1195 | 61 | 2 | 2 | 1 |   |
| 3 | Wuchang | 2 | 1196 | 80 | 3 | 1 |   | 1 |
| 3 | Wuchang | 2 | 1197 | 53 | 2 | 2 |   | 1 |
| 3 | Wuchang | 2 | 1198 | 51 | 2 | 1 |   | 1 |
| 3 | Wuchang | 2 | 1199 | 82 | 3 | 1 |   | 1 |
| 3 | Wuchang | 2 | 1200 | 51 | 2 | 2 |   | 1 |
| 3 | Wuchang | 2 | 1201 | 53 | 2 | 2 | 1 |   |
| 3 | Wuchang | 2 | 1202 | 75 | 3 | 1 | 1 | 1 |
| 3 | Wuchang | 2 | 1203 | 54 | 2 | 1 |   | 1 |
| 3 | Wuchang | 2 | 1204 | 66 | 3 | 1 |   | 1 |
| 3 | Wuchang | 2 | 1205 | 59 | 2 | 2 |   | 1 |
| 3 | Wuchang | 2 | 1206 | 53 | 2 | 2 |   | 1 |
| 3 | Wuchang | 2 | 1207 | 83 | 3 | 2 | 1 | 1 |
| 3 | Wuchang | 2 | 1208 | 57 | 2 | 2 |   | 1 |
| 3 | Wuchang | 2 | 1209 | 18 | 2 | 1 | 1 |   |

|   |         |   |      |    |   |   |   |   |
|---|---------|---|------|----|---|---|---|---|
| 3 | Wuchang | 2 | 1210 | 30 | 2 | 1 | 1 |   |
| 3 | Wuchang | 2 | 1211 | 29 | 2 | 1 | 1 |   |
| 3 | Wuchang | 2 | 1212 | 76 | 3 | 2 |   | 1 |
| 3 | Wuchang | 2 | 1213 | 48 | 2 | 1 |   | 1 |
| 3 | Wuchang | 2 | 1214 | 60 | 2 | 2 |   | 1 |
| 3 | Wuchang | 2 | 1215 | 46 | 2 | 1 | 1 |   |
| 3 | Wuchang | 2 | 1216 | 59 | 2 | 1 | 1 |   |
| 3 | Wuchang | 2 | 1217 | 64 | 2 | 1 |   | 1 |
| 3 | Wuchang | 2 | 1218 | 69 | 3 | 2 |   | 1 |
| 3 | Wuchang | 2 | 1219 | 20 | 2 | 1 |   | 1 |
| 3 | Wuchang | 2 | 1220 | 41 | 2 | 1 |   | 1 |
| 3 | Wuchang | 2 | 1221 | 63 | 2 | 1 | 1 |   |
| 3 | Wuchang | 2 | 1222 | 51 | 2 | 2 |   | 1 |
| 3 | Wuchang | 2 | 1223 | 47 | 2 | 2 |   | 1 |
| 3 | Wuchang | 2 | 1224 | 44 | 2 | 1 |   | 1 |
| 3 | Wuchang | 2 | 1225 | 49 | 2 | 1 |   | 1 |
| 3 | Wuchang | 2 | 1226 | 21 | 2 | 1 |   | 1 |
| 3 | Wuchang | 2 | 1227 | 29 | 2 | 1 | 1 | 1 |
| 3 | Wuchang | 2 | 1228 | 18 | 2 | 2 | 1 |   |
| 3 | Wuchang | 2 | 1229 | 65 | 3 | 2 |   | 1 |
| 3 | Wuchang | 2 | 1230 | 58 | 2 | 1 | 1 |   |
| 3 | Wuchang | 2 | 1231 | 38 | 2 | 1 |   | 1 |
| 3 | Wuchang | 2 | 1232 | 61 | 2 | 1 | 1 |   |
| 3 | Wuchang | 2 | 1233 | 65 | 3 | 2 |   | 1 |
| 3 | Wuchang | 2 | 1234 | 44 | 2 | 1 |   | 1 |
| 3 | Wuchang | 2 | 1235 | 46 | 2 | 2 | 1 |   |
| 3 | Wuchang | 2 | 1236 | 29 | 2 | 2 |   | 1 |
| 3 | Wuchang | 2 | 1237 | 56 | 2 | 2 |   | 1 |
| 3 | Wuchang | 2 | 1238 | 71 | 3 | 1 |   | 1 |
| 3 | Wuchang | 2 | 1239 | 71 | 3 | 1 |   | 1 |
| 3 | Wuchang | 2 | 1240 | 15 | 2 | 1 | 1 |   |
| 3 | Wuchang | 2 | 1241 | 30 | 2 | 1 |   | 1 |
| 3 | Wuchang | 2 | 1242 | 43 | 2 | 1 |   | 1 |
| 3 | Wuchang | 2 | 1243 | 63 | 2 | 1 | 1 | 1 |
| 3 | Wuchang | 2 | 1244 | 51 | 2 | 1 |   | 1 |
| 3 | Wuchang | 2 | 1245 | 58 | 2 | 2 |   | 1 |
| 3 | Wuchang | 2 | 1246 | 71 | 3 | 2 | 1 |   |
| 3 | Wuchang | 2 | 1247 | 56 | 2 | 1 | 1 | 1 |
| 3 | Wuchang | 2 | 1248 | 68 | 3 | 1 |   | 1 |
| 3 | Wuchang | 2 | 1249 | 52 | 2 | 1 | 1 |   |
| 3 | Wuchang | 2 | 1250 | 31 | 2 | 1 |   | 1 |
| 3 | Wuchang | 2 | 1251 | 27 | 2 | 2 |   | 1 |
| 3 | Wuchang | 2 | 1252 | 38 | 2 | 2 |   | 1 |
| 3 | Wuchang | 2 | 1253 | 47 | 2 | 1 |   | 1 |
| 3 | Wuchang | 2 | 1254 | 48 | 2 | 2 |   | 1 |
| 3 | Wuchang | 2 | 1255 | 46 | 2 | 1 |   | 1 |
| 3 | Wuchang | 2 | 1256 | 44 | 2 | 1 |   | 1 |
| 3 | Wuchang | 2 | 1257 | 74 | 3 | 1 |   | 1 |
| 3 | Wuchang | 2 | 1258 | 67 | 3 | 1 |   | 1 |
| 3 | Wuchang | 2 | 1259 | 60 | 2 | 1 |   | 1 |
| 3 | Wuchang | 2 | 1260 | 42 | 2 | 1 |   | 1 |
| 3 | Wuchang | 2 | 1261 | 76 | 3 | 1 |   | 1 |
| 3 | Wuchang | 2 | 1262 | 55 | 2 | 1 |   | 1 |
| 3 | Wuchang | 2 | 1263 | 61 | 2 | 1 | 1 | 1 |



|   |         |   |      |    |   |   |   |   |
|---|---------|---|------|----|---|---|---|---|
| 3 | Wuchang | 2 | 1264 | 68 | 3 | 1 | 1 |   |
| 3 | Wuchang | 2 | 1265 | 40 | 2 | 1 | 1 | 1 |
| 3 | Wuchang | 2 | 1266 | 54 | 2 | 1 |   | 1 |
| 3 | Wuchang | 2 | 1267 | 63 | 2 | 2 |   | 1 |
| 3 | Wuchang | 2 | 1268 | 37 | 2 | 1 |   | 1 |
| 3 | Wuchang | 2 | 1269 | 81 | 3 | 1 |   | 1 |
| 3 | Wuchang | 2 | 1270 | 73 | 3 | 2 |   | 1 |
| 3 | Wuchang | 2 | 1271 | 66 | 3 | 1 | 1 | 1 |
| 3 | Wuchang | 2 | 1272 | 86 | 3 | 1 | 1 |   |
| 3 | Wuchang | 2 | 1273 | 53 | 2 | 2 |   | 1 |
| 3 | Wuchang | 2 | 1274 | 54 | 2 | 2 | 1 |   |
| 3 | Wuchang | 2 | 1275 | 41 | 2 | 2 |   | 1 |
| 3 | Wuchang | 2 | 1276 | 26 | 2 | 1 | 1 | 1 |
| 3 | Wuchang | 2 | 1277 | 43 | 2 | 2 | 1 |   |
| 3 | Wuchang | 2 | 1278 | 26 | 2 | 1 |   | 1 |
| 3 | Wuchang | 2 | 1279 | 59 | 2 | 1 |   | 1 |
| 3 | Wuchang | 2 | 1280 | 18 | 2 | 1 |   | 1 |
| 3 | Wuchang | 2 | 1281 | 28 | 2 | 1 | 1 |   |
| 3 | Wuchang | 2 | 1282 | 34 | 2 | 1 |   | 1 |
| 3 | Wuchang | 2 | 1283 | 28 | 2 | 1 |   | 1 |
| 3 | Wuchang | 2 | 1284 | 60 | 2 | 1 | 1 |   |
| 3 | Wuchang | 2 | 1285 | 69 | 3 | 1 |   | 1 |
| 3 | Wuchang | 2 | 1286 | 52 | 2 | 1 |   | 1 |
| 3 | Wuchang | 2 | 1287 | 49 | 2 | 1 |   | 1 |
| 3 | Wuchang | 2 | 1288 | 50 | 2 | 1 |   | 1 |
| 3 | Wuchang | 2 | 1289 | 60 | 2 | 2 |   | 1 |
| 3 | Wuchang | 2 | 1290 | 25 | 2 | 1 |   | 1 |
| 3 | Wuchang | 2 | 1291 | 63 | 2 | 2 | 1 |   |
| 3 | Wuchang | 2 | 1292 | 68 | 3 | 1 |   | 1 |
| 3 | Wuchang | 2 | 1293 | 24 | 2 | 2 |   | 1 |
| 3 | Wuchang | 2 | 1294 | 56 | 2 | 2 |   | 1 |
| 3 | Wuchang | 2 | 1295 | 65 | 3 | 1 |   | 1 |
| 3 | Wuchang | 2 | 1296 | 57 | 2 | 1 | 1 |   |
| 3 | Wuchang | 2 | 1297 | 57 | 2 | 2 |   | 1 |
| 3 | Wuchang | 2 | 1298 | 41 | 2 | 2 |   | 1 |
| 3 | Wuchang | 2 | 1299 | 54 | 2 | 2 | 1 | 1 |
| 3 | Wuchang | 2 | 1300 | 56 | 2 | 1 | 1 | 1 |
| 3 | Wuchang | 2 | 1301 | 72 | 3 | 1 |   | 1 |
| 3 | Wuchang | 2 | 1302 | 63 | 2 | 1 | 1 | 1 |
| 3 | Wuchang | 2 | 1303 | 47 | 2 | 1 | 1 |   |
| 3 | Wuchang | 2 | 1304 | 39 | 2 | 1 | 1 |   |
| 3 | Wuchang | 2 | 1305 | 82 | 3 | 1 | 1 | 1 |
| 3 | Wuchang | 2 | 1306 | 45 | 2 | 1 |   | 1 |
| 3 | Wuchang | 2 | 1307 | 62 | 2 | 1 |   | 1 |
| 3 | Wuchang | 2 | 1308 | 61 | 2 | 1 |   | 1 |
| 3 | Wuchang | 2 | 1309 | 60 | 2 | 2 |   | 1 |
| 3 | Wuchang | 2 | 1310 | 58 | 2 | 1 |   | 1 |
| 3 | Wuchang | 2 | 1311 | 39 | 2 | 2 |   | 1 |
| 3 | Wuchang | 2 | 1312 | 82 | 3 | 1 |   | 1 |
| 3 | Wuchang | 2 | 1313 | 42 | 2 | 2 |   | 1 |
| 3 | Wuchang | 2 | 1314 | 50 | 2 | 1 |   | 1 |
| 3 | Wuchang | 2 | 1315 | 70 | 3 | 1 |   | 1 |
| 3 | Wuchang | 2 | 1316 | 58 | 2 | 1 |   | 1 |
| 3 | Wuchang | 2 | 1317 | 43 | 2 | 1 | 1 |   |

|   |         |   |      |    |   |   |   |   |
|---|---------|---|------|----|---|---|---|---|
| 3 | Wuchang | 2 | 1318 | 41 | 2 | 2 | 1 | 1 |
| 3 | Wuchang | 2 | 1319 | 63 | 2 | 2 | 1 |   |
| 3 | Wuchang | 2 | 1320 | 56 | 2 | 1 | 1 |   |
| 3 | Wuchang | 2 | 1321 | 44 | 2 | 1 | 1 |   |
| 3 | Wuchang | 2 | 1322 | 85 | 3 | 1 |   | 1 |
| 3 | Wuchang | 2 | 1323 | 73 | 3 | 1 | 1 |   |
| 3 | Wuchang | 2 | 1324 | 42 | 2 | 1 |   | 1 |
| 3 | Wuchang | 2 | 1325 | 46 | 2 | 2 | 1 |   |
| 3 | Wuchang | 2 | 1326 | 51 | 2 | 2 |   | 1 |
| 3 | Wuchang | 2 | 1327 | 41 | 2 | 2 | 1 |   |
| 3 | Wuchang | 2 | 1328 | 63 | 2 | 1 | 1 |   |
| 3 | Wuchang | 2 | 1329 | 22 | 2 | 1 | 1 |   |
| 3 | Wuchang | 2 | 1330 | 64 | 2 | 1 |   | 1 |
| 3 | Wuchang | 2 | 1331 | 30 | 2 | 2 |   | 1 |
| 3 | Wuchang | 2 | 1332 | 51 | 2 | 1 |   | 1 |
| 3 | Wuchang | 2 | 1333 | 59 | 2 | 2 |   | 1 |
| 3 | Wuchang | 2 | 1334 | 48 | 2 | 1 |   | 1 |
| 3 | Wuchang | 2 | 1335 | 42 | 2 | 1 |   | 1 |
| 3 | Wuchang | 2 | 1336 | 42 | 2 | 2 |   | 1 |
| 3 | Wuchang | 2 | 1337 | 15 | 2 | 2 | 1 |   |
| 3 | Wuchang | 2 | 1338 | 54 | 2 | 1 | 1 |   |
| 3 | Wuchang | 2 | 1339 | 14 | 1 | 2 |   | 1 |
| 3 | Wuchang | 2 | 1340 | 28 | 2 | 2 | 1 |   |
| 3 | Wuchang | 2 | 1341 | 19 | 2 | 1 | 1 |   |
| 3 | Wuchang | 2 | 1342 | 6  | 1 | 1 | 1 |   |
| 3 | Wuchang | 2 | 1343 | 51 | 2 | 1 |   | 1 |
| 3 | Wuchang | 2 | 1344 | 51 | 2 | 1 |   | 1 |
| 3 | Wuchang | 2 | 1345 | 55 | 2 | 1 |   | 1 |
| 3 | Wuchang | 2 | 1346 | 56 | 2 | 1 | 1 |   |
| 3 | Wuchang | 2 | 1347 | 63 | 2 | 1 | 1 | 1 |
| 3 | Wuchang | 2 | 1348 | 57 | 2 | 1 |   | 1 |
| 3 | Wuchang | 2 | 1349 | 40 | 2 | 1 | 1 |   |
| 3 | Wuchang | 2 | 1350 | 42 | 2 | 2 |   | 1 |
| 3 | Wuchang | 2 | 1351 | 60 | 2 | 2 |   | 1 |
| 3 | Wuchang | 2 | 1352 | 59 | 2 | 1 |   | 1 |
| 3 | Wuchang | 2 | 1353 | 61 | 2 | 1 |   | 1 |
| 3 | Wuchang | 2 | 1354 | 65 | 3 | 1 |   | 1 |
| 3 | Wuchang | 2 | 1355 | 53 | 2 | 1 |   | 1 |
| 3 | Wuchang | 2 | 1356 | 73 | 3 | 1 | 1 |   |
| 3 | Wuchang | 2 | 1357 | 26 | 2 | 1 |   | 1 |
| 3 | Wuchang | 2 | 1358 | 53 | 2 | 1 |   | 1 |
| 3 | Wuchang | 2 | 1359 | 24 | 2 | 1 |   | 1 |
| 3 | Wuchang | 2 | 1360 | 54 | 2 | 1 | 1 |   |
| 3 | Wuchang | 2 | 1361 | 68 | 3 | 2 | 1 |   |
| 3 | Wuchang | 2 | 1362 | 65 | 3 | 1 |   | 1 |
| 3 | Wuchang | 2 | 1363 | 59 | 2 | 1 | 1 | 1 |
| 3 | Wuchang | 2 | 1364 | 37 | 2 | 1 |   | 1 |
| 3 | Wuchang | 2 | 1365 | 21 | 2 | 1 | 1 | 1 |
| 3 | Wuchang | 2 | 1366 | 49 | 2 | 2 |   | 1 |
| 3 | Wuchang | 2 | 1367 | 58 | 2 | 1 | 1 | 1 |
| 3 | Wuchang | 2 | 1368 | 62 | 2 | 1 | 1 |   |
| 3 | Wuchang | 2 | 1369 | 71 | 3 | 2 |   | 1 |
| 3 | Wuchang | 2 | 1370 | 66 | 3 | 1 |   | 1 |
| 3 | Wuchang | 2 | 1371 | 49 | 2 | 1 |   | 1 |

|   |         |   |      |    |   |   |   |   |
|---|---------|---|------|----|---|---|---|---|
| 3 | Wuchang | 2 | 1372 | 48 | 2 | 2 | 1 |   |
| 3 | Wuchang | 2 | 1373 | 59 | 2 | 2 |   | 1 |
| 3 | Wuchang | 2 | 1374 | 42 | 2 | 1 |   | 1 |
| 3 | Wuchang | 2 | 1375 | 51 | 2 | 1 | 1 |   |
| 3 | Wuchang | 2 | 1376 | 27 | 2 | 1 |   | 1 |
| 3 | Wuchang | 2 | 1377 | 72 | 3 | 1 |   | 1 |
| 3 | Wuchang | 2 | 1378 | 69 | 3 | 2 | 1 |   |
| 3 | Wuchang | 2 | 1379 | 68 | 3 | 2 | 1 | 1 |
| 3 | Wuchang | 2 | 1380 | 58 | 2 | 2 |   | 1 |
| 3 | Wuchang | 2 | 1381 | 67 | 3 | 2 | 1 |   |
| 3 | Wuchang | 2 | 1382 | 68 | 3 | 2 |   | 1 |
| 3 | Wuchang | 2 | 1383 | 48 | 2 | 2 |   | 1 |
| 3 | Wuchang | 2 | 1384 | 48 | 2 | 2 |   | 1 |
| 3 | Wuchang | 2 | 1385 | 59 | 2 | 2 |   | 1 |
| 3 | Wuchang | 2 | 1386 | 67 | 3 | 2 | 1 | 1 |
| 3 | Wuchang | 2 | 1387 | 19 | 2 | 1 |   | 1 |
| 3 | Wuchang | 2 | 1388 | 58 | 2 | 1 |   | 1 |
| 3 | Wuchang | 2 | 1389 | 71 | 3 | 1 |   | 1 |
| 3 | Wuchang | 2 | 1390 | 22 | 2 | 1 |   | 1 |
| 3 | Wuchang | 2 | 1391 | 56 | 2 | 1 |   | 1 |
| 3 | Wuchang | 2 | 1392 | 51 | 2 | 1 |   | 1 |
| 3 | Wuchang | 2 | 1393 | 71 | 3 | 1 |   | 1 |
| 3 | Wuchang | 2 | 1394 | 44 | 2 | 1 | 1 |   |
| 3 | Wuchang | 2 | 1395 | 47 | 2 | 2 |   | 1 |
| 3 | Wuchang | 2 | 1396 | 72 | 3 | 2 |   | 1 |
| 3 | Wuchang | 2 | 1397 | 62 | 2 | 2 | 1 | 1 |
| 3 | Wuchang | 2 | 1398 | 21 | 2 | 1 |   | 1 |
| 3 | Wuchang | 2 | 1399 | 62 | 2 | 1 |   | 1 |
| 3 | Wuchang | 2 | 1400 | 43 | 2 | 2 |   | 1 |
| 3 | Wuchang | 2 | 1401 | 50 | 2 | 1 |   | 1 |
| 3 | Wuchang | 2 | 1402 | 42 | 2 | 2 |   | 1 |
| 3 | Wuchang | 2 | 1403 | 52 | 2 | 1 |   | 1 |
| 3 | Wuchang | 2 | 1404 | 53 | 2 | 1 |   | 1 |
| 3 | Wuchang | 2 | 1405 | 64 | 2 | 1 |   | 1 |
| 3 | Wuchang | 2 | 1406 | 51 | 2 | 1 | 1 |   |
| 3 | Wuchang | 2 | 1407 | 28 | 2 | 2 | 1 |   |
| 3 | Wuchang | 2 | 1408 | 61 | 2 | 1 |   | 1 |
| 3 | Wuchang | 2 | 1409 | 49 | 2 | 1 | 1 |   |
| 3 | Wuchang | 2 | 1410 | 30 | 2 | 1 |   | 1 |
| 3 | Wuchang | 2 | 1411 | 35 | 2 | 1 |   | 1 |
| 3 | Wuchang | 2 | 1412 | 80 | 3 | 1 |   | 1 |
| 3 | Wuchang | 2 | 1413 | 84 | 3 | 2 | 1 |   |
| 3 | Wuchang | 2 | 1414 | 68 | 3 | 1 |   | 1 |
| 3 | Wuchang | 2 | 1415 | 67 | 3 | 1 | 1 |   |
| 3 | Wuchang | 2 | 1416 | 44 | 2 | 1 |   | 1 |
| 3 | Wuchang | 2 | 1417 | 46 | 2 | 1 |   | 1 |
| 3 | Wuchang | 2 | 1418 | 55 | 2 | 1 |   | 1 |
| 3 | Wuchang | 2 | 1419 | 20 | 2 | 1 |   | 1 |
| 3 | Wuchang | 2 | 1420 | 65 | 3 | 1 |   | 1 |
| 3 | Wuchang | 2 | 1421 | 39 | 2 | 1 | 1 |   |
| 3 | Wuchang | 2 | 1422 | 67 | 3 | 1 |   | 1 |
| 3 | Wuchang | 2 | 1423 | 50 | 2 | 1 |   | 1 |
| 3 | Wuchang | 2 | 1424 | 33 | 2 | 1 |   | 1 |
| 3 | Wuchang | 2 | 1425 | 66 | 3 | 2 | 1 |   |

|   |         |   |      |    |   |   |   |   |
|---|---------|---|------|----|---|---|---|---|
| 3 | Wuchang | 2 | 1426 | 46 | 2 | 1 |   | 1 |
| 3 | Wuchang | 2 | 1427 | 78 | 3 | 1 |   | 1 |
| 3 | Wuchang | 2 | 1428 | 53 | 2 | 1 |   | 1 |
| 3 | Wuchang | 2 | 1429 | 60 | 2 | 1 | 1 |   |
| 3 | Wuchang | 2 | 1430 | 58 | 2 | 1 |   | 1 |
| 3 | Wuchang | 2 | 1431 | 73 | 3 | 2 |   | 1 |
| 3 | Wuchang | 2 | 1432 | 53 | 2 | 1 | 1 |   |
| 3 | Wuchang | 2 | 1433 | 53 | 2 | 1 | 1 | 1 |
| 3 | Wuchang | 2 | 1434 | 40 | 2 | 1 |   | 1 |
| 3 | Wuchang | 2 | 1435 | 31 | 2 | 1 | 1 |   |
| 3 | Wuchang | 2 | 1436 | 37 | 2 | 2 | 1 |   |
| 3 | Wuchang | 2 | 1437 | 42 | 2 | 1 |   | 1 |
| 3 | Wuchang | 2 | 1438 | 37 | 2 | 1 | 1 |   |
| 3 | Wuchang | 2 | 1439 | 63 | 2 | 1 |   | 1 |
| 3 | Wuchang | 2 | 1440 | 34 | 2 | 1 | 1 |   |
| 3 | Wuchang | 2 | 1441 | 69 | 3 | 1 |   | 1 |
| 3 | Wuchang | 2 | 1442 | 58 | 2 | 1 | 1 |   |
| 3 | Wuchang | 2 | 1443 | 58 | 2 | 2 | 1 |   |
| 3 | Wuchang | 2 | 1444 | 59 | 2 | 1 |   | 1 |
| 3 | Wuchang | 2 | 1445 | 69 | 3 | 2 |   | 1 |
| 3 | Wuchang | 2 | 1446 | 38 | 2 | 2 | 1 | 1 |
| 3 | Wuchang | 2 | 1447 | 29 | 2 | 2 | 1 | 1 |
| 3 | Wuchang | 2 | 1448 | 48 | 2 | 1 |   | 1 |
| 3 | Wuchang | 2 | 1449 | 80 | 3 | 1 | 1 |   |
| 3 | Wuchang | 2 | 1450 | 91 | 3 | 1 | 1 | 1 |
| 3 | Wuchang | 2 | 1451 | 50 | 2 | 2 |   | 1 |
| 3 | Wuchang | 2 | 1452 | 65 | 3 | 1 |   | 1 |
| 3 | Wuchang | 2 | 1453 | 79 | 3 | 2 |   | 1 |
| 3 | Wuchang | 2 | 1454 | 82 | 3 | 2 |   | 1 |
| 3 | Wuchang | 2 | 1455 | 31 | 2 | 2 | 1 |   |
| 3 | Wuchang | 2 | 1456 | 42 | 2 | 2 | 1 |   |
| 3 | Wuchang | 2 | 1457 | 64 | 2 | 1 | 1 | 1 |
| 3 | Wuchang | 2 | 1458 | 43 | 2 | 2 |   | 1 |
| 3 | Wuchang | 2 | 1459 | 18 | 2 | 2 |   | 1 |
| 3 | Wuchang | 2 | 1460 | 44 | 2 | 1 |   | 1 |
| 3 | Wuchang | 2 | 1461 | 68 | 3 | 1 | 1 |   |
| 3 | Wuchang | 2 | 1462 | 31 | 2 | 2 |   | 1 |
| 3 | Wuchang | 2 | 1463 | 73 | 3 | 1 | 1 |   |
| 3 | Wuchang | 2 | 1464 | 29 | 2 | 2 | 1 | 1 |
| 3 | Wuchang | 2 | 1465 | 35 | 2 | 1 |   | 1 |
| 3 | Wuchang | 2 | 1466 | 40 | 2 | 2 |   | 1 |
| 3 | Wuchang | 2 | 1467 | 20 | 2 | 1 | 1 |   |
| 3 | Wuchang | 2 | 1468 | 59 | 2 | 2 |   | 1 |
| 3 | Wuchang | 2 | 1469 | 37 | 2 | 2 |   | 1 |
| 3 | Wuchang | 2 | 1470 | 60 | 2 | 2 |   | 1 |
| 3 | Wuchang | 2 | 1471 | 69 | 3 | 1 | 1 |   |
| 3 | Wuchang | 2 | 1472 | 53 | 2 | 2 | 1 |   |
| 3 | Wuchang | 2 | 1473 | 53 | 2 | 2 | 1 |   |
| 3 | Wuchang | 2 | 1474 | 46 | 2 | 2 |   | 1 |
| 3 | Wuchang | 2 | 1475 | 57 | 2 | 1 |   | 1 |
| 3 | Wuchang | 2 | 1476 | 67 | 3 | 2 |   | 1 |
| 3 | Wuchang | 2 | 1477 | 76 | 3 | 1 |   | 1 |
| 3 | Wuchang | 2 | 1478 | 72 | 3 | 1 |   | 1 |
| 3 | Wuchang | 2 | 1479 | 51 | 2 | 1 | 1 |   |

|   |         |   |      |    |   |   |   |   |
|---|---------|---|------|----|---|---|---|---|
| 3 | Wuchang | 2 | 1480 | 61 | 2 | 1 | 1 | 1 |
| 3 | Wuchang | 2 | 1481 | 25 | 2 | 1 |   | 1 |
| 3 | Wuchang | 2 | 1482 | 58 | 2 | 1 |   | 1 |
| 3 | Wuchang | 2 | 1483 | 53 | 2 | 1 | 1 |   |
| 3 | Wuchang | 2 | 1484 | 21 | 2 | 1 |   | 1 |
| 3 | Wuchang | 2 | 1485 | 55 | 2 | 1 |   | 1 |
| 3 | Wuchang | 2 | 1486 | 53 | 2 | 1 | 1 |   |
| 3 | Wuchang | 2 | 1487 | 43 | 2 | 1 |   | 1 |
| 3 | Wuchang | 2 | 1488 | 48 | 2 | 1 |   | 1 |
| 3 | Wuchang | 2 | 1489 | 53 | 2 | 1 | 1 |   |
| 3 | Wuchang | 2 | 1490 | 39 | 2 | 1 |   | 1 |
| 3 | Wuchang | 2 | 1491 | 36 | 2 | 1 |   | 1 |
| 3 | Wuchang | 2 | 1492 | 52 | 2 | 1 |   | 1 |
| 3 | Wuchang | 2 | 1493 | 54 | 2 | 1 | 1 | 1 |
| 3 | Wuchang | 2 | 1494 | 71 | 3 | 2 |   | 1 |
| 3 | Wuchang | 2 | 1495 | 25 | 2 | 2 |   | 1 |
| 3 | Wuchang | 2 | 1496 | 19 | 2 | 2 |   | 1 |
| 3 | Wuchang | 2 | 1497 | 57 | 2 | 1 | 1 |   |
| 3 | Wuchang | 2 | 1498 | 41 | 2 | 2 |   | 1 |
| 3 | Wuchang | 2 | 1499 | 22 | 2 | 1 |   | 1 |
| 3 | Wuchang | 2 | 1500 | 61 | 2 | 2 | 1 | 1 |
| 3 | Wuchang | 2 | 1501 | 69 | 3 | 1 |   | 1 |
| 3 | Wuchang | 2 | 1502 | 67 | 3 | 1 | 1 |   |
| 3 | Wuchang | 2 | 1503 | 46 | 2 | 1 |   | 1 |
| 3 | Wuchang | 2 | 1504 | 24 | 2 | 2 | 1 |   |
| 3 | Wuchang | 2 | 1505 | 60 | 2 | 1 | 1 |   |
| 3 | Wuchang | 2 | 1506 | 66 | 3 | 2 | 1 | 1 |
| 3 | Wuchang | 2 | 1507 | 37 | 2 | 1 | 1 |   |
| 3 | Wuchang | 2 | 1508 | 26 | 2 | 1 |   | 1 |
| 3 | Wuchang | 2 | 1509 | 33 | 2 | 2 |   | 1 |
| 3 | Wuchang | 2 | 1510 | 21 | 2 | 1 |   | 1 |
| 3 | Wuchang | 2 | 1511 | 46 | 2 | 1 |   | 1 |
| 3 | Wuchang | 2 | 1512 | 51 | 2 | 1 |   | 1 |
| 3 | Wuchang | 2 | 1513 | 32 | 2 | 2 | 1 | 1 |
| 3 | Wuchang | 2 | 1514 | 85 | 3 | 2 | 1 |   |
| 3 | Wuchang | 2 | 1515 | 40 | 2 | 1 |   | 1 |
| 3 | Wuchang | 2 | 1516 | 59 | 2 | 1 |   | 1 |
| 3 | Wuchang | 2 | 1517 | 33 | 2 | 2 |   | 1 |
| 3 | Wuchang | 2 | 1518 | 43 | 2 | 2 |   | 1 |
| 3 | Wuchang | 2 | 1519 | 30 | 2 | 2 |   | 1 |
| 3 | Wuchang | 2 | 1520 | 25 | 2 | 1 |   | 1 |
| 3 | Wuchang | 2 | 1521 | 57 | 2 | 2 | 1 | 1 |
| 3 | Wuchang | 2 | 1522 | 76 | 3 | 2 |   | 1 |
| 3 | Wuchang | 2 | 1523 | 60 | 2 | 2 |   | 1 |
| 3 | Wuchang | 2 | 1524 | 42 | 2 | 2 | 1 | 1 |
| 3 | Wuchang | 2 | 1525 | 60 | 2 | 1 |   | 1 |
| 3 | Wuchang | 2 | 1526 | 70 | 3 | 1 |   | 1 |
| 3 | Wuchang | 2 | 1527 | 45 | 2 | 2 | 1 | 1 |
| 3 | Wuchang | 2 | 1528 | 36 | 2 | 2 |   | 1 |
| 3 | Wuchang | 2 | 1529 | 52 | 2 | 2 | 1 |   |
| 3 | Wuchang | 2 | 1530 | 52 | 2 | 1 |   | 1 |
| 3 | Wuchang | 2 | 1531 | 36 | 2 | 1 |   | 1 |
| 3 | Wuchang | 2 | 1532 | 53 | 2 | 1 |   | 1 |
| 3 | Wuchang | 2 | 1533 | 31 | 2 | 2 |   | 1 |

|   |         |   |      |    |   |   |   |   |
|---|---------|---|------|----|---|---|---|---|
| 3 | Wuchang | 2 | 1534 | 61 | 2 | 1 |   | 1 |
| 3 | Wuchang | 2 | 1535 | 67 | 3 | 2 |   | 1 |
| 3 | Wuchang | 2 | 1536 | 68 | 3 | 2 |   | 1 |
| 3 | Wuchang | 2 | 1537 | 40 | 2 | 1 |   | 1 |
| 3 | Wuchang | 2 | 1538 | 40 | 2 | 1 | 1 |   |
| 3 | Wuchang | 2 | 1539 | 69 | 3 | 1 | 1 | 1 |
| 3 | Wuchang | 2 | 1540 | 22 | 2 | 2 | 1 | 1 |
| 3 | Wuchang | 2 | 1541 | 31 | 2 | 2 |   | 1 |
| 3 | Wuchang | 2 | 1542 | 69 | 3 | 1 | 1 | 1 |
| 3 | Wuchang | 2 | 1543 | 73 | 3 | 1 |   | 1 |
| 3 | Wuchang | 2 | 1544 | 40 | 2 | 1 |   | 1 |
| 3 | Wuchang | 2 | 1545 | 44 | 2 | 1 |   | 1 |
| 3 | Wuchang | 2 | 1546 | 50 | 2 | 1 |   | 1 |
| 3 | Wuchang | 2 | 1547 | 65 | 3 | 1 | 1 |   |
| 3 | Wuchang | 2 | 1548 | 30 | 2 | 1 |   | 1 |
| 3 | Wuchang | 2 | 1549 | 31 | 2 | 1 |   | 1 |
| 3 | Wuchang | 2 | 1550 | 25 | 2 | 1 |   | 1 |
| 3 | Wuchang | 2 | 1551 | 47 | 2 | 1 | 1 | 1 |
| 3 | Wuchang | 2 | 1552 | 26 | 2 | 2 | 1 | 1 |
| 3 | Wuchang | 2 | 1553 | 19 | 2 | 1 | 1 | 1 |
| 3 | Wuchang | 2 | 1554 | 55 | 2 | 2 |   | 1 |
| 3 | Wuchang | 2 | 1555 | 64 | 2 | 1 |   | 1 |
| 3 | Wuchang | 2 | 1556 | 23 | 2 | 2 | 1 |   |
| 3 | Wuchang | 2 | 1557 | 42 | 2 | 1 | 1 | 1 |
| 3 | Wuchang | 2 | 1558 | 45 | 2 | 1 |   | 1 |
| 3 | Wuchang | 2 | 1559 | 55 | 2 | 2 |   | 1 |
| 3 | Wuchang | 2 | 1560 | 65 | 3 | 2 | 1 |   |
| 3 | Wuchang | 2 | 1561 | 61 | 2 | 1 |   | 1 |
| 3 | Wuchang | 2 | 1562 | 95 | 3 | 1 | 1 |   |
| 3 | Wuchang | 2 | 1563 | 60 | 2 | 1 | 1 |   |
| 3 | Wuchang | 2 | 1564 | 19 | 2 | 1 |   | 1 |
| 3 | Wuchang | 2 | 1565 | 32 | 2 | 1 |   | 1 |
| 3 | Wuchang | 2 | 1566 | 51 | 2 | 1 |   | 1 |
| 3 | Wuchang | 2 | 1567 | 52 | 2 | 1 | 1 | 1 |
| 3 | Wuchang | 2 | 1568 | 53 | 2 | 2 |   | 1 |
| 3 | Wuchang | 2 | 1569 | 57 | 2 | 1 | 1 |   |
| 3 | Wuchang | 2 | 1570 | 60 | 2 | 1 | 1 |   |
| 3 | Wuchang | 2 | 1571 | 50 | 2 | 1 |   | 1 |
| 3 | Wuchang | 2 | 1572 | 43 | 2 | 2 | 1 |   |
| 3 | Wuchang | 2 | 1573 | 17 | 2 | 2 | 1 |   |
| 3 | Wuchang | 2 | 1574 | 22 | 2 | 1 |   | 1 |
| 3 | Wuchang | 2 | 1575 | 48 | 2 | 1 | 1 |   |
| 3 | Wuchang | 2 | 1576 | 55 | 2 | 2 | 1 |   |
| 3 | Wuchang | 2 | 1577 | 36 | 2 | 1 | 1 | 1 |
| 3 | Wuchang | 2 | 1578 | 51 | 2 | 1 |   | 1 |
| 3 | Wuchang | 2 | 1579 | 29 | 2 | 2 |   | 1 |
| 3 | Wuchang | 2 | 1580 | 43 | 2 | 2 |   | 1 |
| 3 | Wuchang | 2 | 1581 | 24 | 2 | 1 | 1 |   |
| 3 | Wuchang | 2 | 1582 | 59 | 2 | 1 |   | 1 |
| 3 | Wuchang | 2 | 1583 | 71 | 3 | 1 |   | 1 |
| 3 | Wuchang | 2 | 1584 | 24 | 2 | 2 | 1 |   |
| 3 | Wuchang | 2 | 1585 | 56 | 2 | 1 |   | 1 |
| 3 | Wuchang | 2 | 1586 | 43 | 2 | 2 |   | 1 |
| 3 | Wuchang | 2 | 1587 | 45 | 2 | 2 |   | 1 |

|   |         |   |      |    |   |   |   |   |
|---|---------|---|------|----|---|---|---|---|
| 3 | Wuchang | 2 | 1588 | 58 | 2 | 2 |   | 1 |
| 3 | Wuchang | 2 | 1589 | 35 | 2 | 1 |   | 1 |
| 3 | Wuchang | 2 | 1590 | 56 | 2 | 2 |   | 1 |
| 3 | Wuchang | 2 | 1591 | 68 | 3 | 1 |   | 1 |
| 3 | Wuchang | 2 | 1592 | 42 | 2 | 1 | 1 |   |
| 3 | Wuchang | 2 | 1593 | 67 | 3 | 2 | 1 | 1 |
| 3 | Wuchang | 2 | 1594 | 66 | 3 | 2 |   | 1 |
| 3 | Wuchang | 2 | 1595 | 72 | 3 | 2 |   | 1 |
| 3 | Wuchang | 2 | 1596 | 57 | 2 | 1 | 1 |   |
| 3 | Wuchang | 2 | 1597 | 39 | 2 | 1 |   | 1 |
| 3 | Wuchang | 2 | 1598 | 46 | 2 | 1 |   | 1 |
| 3 | Wuchang | 2 | 1599 | 28 | 2 | 1 |   | 1 |
| 3 | Wuchang | 2 | 1600 | 21 | 2 | 1 |   | 1 |
| 3 | Wuchang | 2 | 1601 | 38 | 2 | 2 |   | 1 |
| 3 | Wuchang | 2 | 1602 | 81 | 3 | 2 | 1 |   |
| 3 | Wuchang | 2 | 1603 | 51 | 2 | 1 |   | 1 |
| 3 | Wuchang | 2 | 1604 | 61 | 2 | 1 |   | 1 |
| 3 | Wuchang | 2 | 1605 | 26 | 2 | 1 |   | 1 |
| 3 | Wuchang | 2 | 1606 | 50 | 2 | 2 |   | 1 |
| 3 | Wuchang | 2 | 1607 | 32 | 2 | 1 | 1 |   |
| 3 | Wuchang | 2 | 1608 | 42 | 2 | 1 | 1 | 1 |
| 3 | Wuchang | 2 | 1609 | 44 | 2 | 1 | 1 | 1 |
| 3 | Wuchang | 2 | 1610 | 77 | 3 | 1 |   | 1 |
| 3 | Wuchang | 2 | 1611 | 64 | 2 | 1 |   | 1 |
| 3 | Wuchang | 2 | 1612 | 69 | 3 | 1 | 1 |   |
| 3 | Wuchang | 2 | 1613 | 47 | 2 | 1 |   | 1 |
| 3 | Wuchang | 2 | 1614 | 40 | 2 | 2 |   | 1 |
| 3 | Wuchang | 2 | 1615 | 24 | 2 | 1 | 1 |   |
| 3 | Wuchang | 2 | 1616 | 27 | 2 | 1 |   | 1 |
| 3 | Wuchang | 2 | 1617 | 74 | 3 | 2 | 1 | 1 |
| 3 | Wuchang | 2 | 1618 | 49 | 2 | 2 |   | 1 |
| 3 | Wuchang | 2 | 1619 | 52 | 2 | 1 |   | 1 |
| 3 | Wuchang | 2 | 1620 | 60 | 2 | 1 | 1 |   |
| 3 | Wuchang | 2 | 1621 | 61 | 2 | 1 |   | 1 |
| 3 | Wuchang | 2 | 1622 | 60 | 2 | 2 | 1 |   |
| 3 | Wuchang | 2 | 1623 | 80 | 3 | 1 |   | 1 |
| 3 | Wuchang | 2 | 1624 | 18 | 2 | 1 |   | 1 |
| 3 | Wuchang | 2 | 1625 | 63 | 2 | 2 | 1 |   |
| 3 | Wuchang | 2 | 1626 | 65 | 3 | 2 | 1 |   |
| 3 | Wuchang | 2 | 1627 | 34 | 2 | 2 |   | 1 |
| 3 | Wuchang | 2 | 1628 | 54 | 2 | 2 | 1 | 1 |
| 3 | Wuchang | 2 | 1629 | 59 | 2 | 1 |   | 1 |
| 3 | Wuchang | 2 | 1630 | 49 | 2 | 1 |   | 1 |
| 3 | Wuchang | 2 | 1631 | 54 | 2 | 1 |   | 1 |
| 3 | Wuchang | 2 | 1632 | 73 | 3 | 2 |   | 1 |
| 3 | Wuchang | 2 | 1633 | 72 | 3 | 2 | 1 |   |
| 3 | Wuchang | 2 | 1634 | 51 | 2 | 1 | 1 | 1 |
| 3 | Wuchang | 2 | 1635 | 64 | 2 | 1 |   | 1 |
| 3 | Wuchang | 2 | 1636 | 56 | 2 | 1 | 1 |   |
| 3 | Wuchang | 2 | 1637 | 69 | 3 | 1 |   | 1 |
| 3 | Wuchang | 2 | 1638 | 48 | 2 | 2 | 1 | 1 |
| 3 | Wuchang | 2 | 1639 | 64 | 2 | 2 |   | 1 |
| 3 | Wuchang | 2 | 1640 | 69 | 3 | 2 |   | 1 |
| 3 | Wuchang | 2 | 1641 | 64 | 2 | 1 |   | 1 |

|   |         |   |      |    |   |   |   |   |
|---|---------|---|------|----|---|---|---|---|
| 3 | Wuchang | 2 | 1642 | 80 | 3 | 1 | 1 |   |
| 3 | Wuchang | 2 | 1643 | 68 | 3 | 2 |   | 1 |
| 3 | Wuchang | 2 | 1644 | 78 | 3 | 1 | 1 |   |
| 3 | Wuchang | 2 | 1645 | 68 | 3 | 2 |   | 1 |
| 3 | Wuchang | 2 | 1646 | 20 | 2 | 1 | 1 |   |
| 3 | Wuchang | 2 | 1647 | 64 | 2 | 2 | 1 | 1 |
| 3 | Wuchang | 2 | 1648 | 50 | 2 | 1 | 1 |   |
| 3 | Wuchang | 2 | 1649 | 42 | 2 | 2 | 1 |   |
| 3 | Wuchang | 2 | 1650 | 34 | 2 | 2 | 1 |   |
| 3 | Wuchang | 2 | 1651 | 26 | 2 | 2 | 1 | 1 |
| 3 | Wuchang | 2 | 1652 | 82 | 3 | 1 | 1 |   |
| 3 | Wuchang | 2 | 1653 | 55 | 2 | 1 |   | 1 |
| 3 | Wuchang | 2 | 1654 | 44 | 2 | 1 |   | 1 |
| 3 | Wuchang | 2 | 1655 | 52 | 2 | 1 | 1 |   |
| 3 | Wuchang | 2 | 1656 | 46 | 2 | 1 |   | 1 |
| 3 | Wuchang | 2 | 1657 | 28 | 2 | 1 |   | 1 |
| 3 | Wuchang | 2 | 1658 | 50 | 2 | 1 |   | 1 |
| 3 | Wuchang | 2 | 1659 | 60 | 2 | 1 |   | 1 |
| 3 | Wuchang | 2 | 1660 | 67 | 3 | 1 |   | 1 |
| 3 | Wuchang | 2 | 1661 | 51 | 2 | 1 |   | 1 |
| 3 | Wuchang | 2 | 1662 | 68 | 3 | 1 | 1 |   |
| 3 | Wuchang | 2 | 1663 | 48 | 2 | 1 |   | 1 |
| 3 | Wuchang | 2 | 1664 | 65 | 3 | 1 | 1 |   |
| 3 | Wuchang | 2 | 1665 | 21 | 2 | 1 |   | 1 |
| 3 | Wuchang | 2 | 1666 | 64 | 2 | 2 | 1 |   |
| 3 | Wuchang | 2 | 1667 | 30 | 2 | 1 | 1 | 1 |
| 3 | Wuchang | 2 | 1668 | 19 | 2 | 1 |   | 1 |
| 3 | Wuchang | 2 | 1669 | 41 | 2 | 1 | 1 |   |
| 3 | Wuchang | 2 | 1670 | 67 | 3 | 1 | 1 |   |
| 3 | Wuchang | 2 | 1671 | 35 | 2 | 1 | 1 |   |
| 3 | Wuchang | 2 | 1672 | 59 | 2 | 2 |   | 1 |
| 3 | Wuchang | 2 | 1673 | 53 | 2 | 2 |   | 1 |
| 3 | Wuchang | 2 | 1674 | 28 | 2 | 1 |   | 1 |
| 3 | Wuchang | 2 | 1675 | 29 | 2 | 2 |   | 1 |
| 3 | Wuchang | 2 | 1676 | 27 | 2 | 2 |   | 1 |
| 3 | Wuchang | 2 | 1677 | 42 | 2 | 1 | 1 |   |
| 3 | Wuchang | 2 | 1678 | 38 | 2 | 1 |   | 1 |
| 3 | Wuchang | 2 | 1679 | 51 | 2 | 1 | 1 | 1 |
| 3 | Wuchang | 2 | 1680 | 27 | 2 | 2 |   | 1 |
| 3 | Wuchang | 2 | 1681 | 29 | 2 | 1 | 1 |   |
| 3 | Wuchang | 2 | 1682 | 19 | 2 | 2 |   | 1 |
| 3 | Wuchang | 2 | 1683 | 49 | 2 | 1 | 1 | 1 |
| 3 | Wuchang | 2 | 1684 | 60 | 2 | 2 |   | 1 |
| 3 | Wuchang | 2 | 1685 | 63 | 2 | 2 |   | 1 |
| 3 | Wuchang | 2 | 1686 | 69 | 3 | 2 |   | 1 |
| 3 | Wuchang | 2 | 1687 | 64 | 2 | 2 |   | 1 |
| 3 | Wuchang | 2 | 1688 | 69 | 3 | 2 |   | 1 |
| 3 | Wuchang | 2 | 1689 | 52 | 2 | 1 | 1 | 1 |
| 3 | Wuchang | 2 | 1690 | 46 | 2 | 1 | 1 | 1 |
| 3 | Wuchang | 2 | 1691 | 15 | 2 | 1 |   | 1 |
| 3 | Wuchang | 2 | 1692 | 35 | 2 | 1 |   | 1 |
| 3 | Wuchang | 2 | 1693 | 29 | 2 | 1 |   | 1 |
| 3 | Wuchang | 2 | 1694 | 62 | 2 | 2 |   | 1 |
| 3 | Wuchang | 2 | 1695 | 66 | 3 | 1 |   | 1 |



|   |         |   |      |    |   |   |   |   |
|---|---------|---|------|----|---|---|---|---|
| 3 | Wuchang | 2 | 1696 | 63 | 2 | 2 |   | 1 |
| 3 | Wuchang | 2 | 1697 | 63 | 2 | 1 | 1 |   |
| 3 | Wuchang | 2 | 1698 | 63 | 2 | 2 |   | 1 |
| 3 | Wuchang | 2 | 1699 | 45 | 2 | 2 |   | 1 |
| 3 | Wuchang | 2 | 1700 | 65 | 3 | 1 |   | 1 |
| 3 | Wuchang | 2 | 1701 | 74 | 3 | 1 |   | 1 |
| 3 | Wuchang | 2 | 1702 | 81 | 3 | 2 | 1 |   |
| 3 | Wuchang | 2 | 1703 | 52 | 2 | 1 |   | 1 |
| 3 | Wuchang | 2 | 1704 | 53 | 2 | 1 | 1 | 1 |
| 3 | Wuchang | 2 | 1705 | 41 | 2 | 2 |   | 1 |
| 3 | Wuchang | 2 | 1706 | 46 | 2 | 2 |   | 1 |
| 3 | Wuchang | 2 | 1707 | 37 | 2 | 2 |   | 1 |
| 3 | Wuchang | 2 | 1708 | 50 | 2 | 2 | 1 | 1 |
| 3 | Wuchang | 2 | 1709 | 76 | 3 | 1 |   | 1 |
| 3 | Wuchang | 2 | 1710 | 55 | 2 | 1 |   | 1 |
| 3 | Wuchang | 2 | 1711 | 20 | 2 | 1 | 1 | 1 |
| 3 | Wuchang | 2 | 1712 | 75 | 3 | 2 |   | 1 |
| 3 | Wuchang | 2 | 1713 | 58 | 2 | 2 |   | 1 |
| 3 | Wuchang | 2 | 1714 | 49 | 2 | 1 | 1 |   |
| 3 | Wuchang | 2 | 1715 | 68 | 3 | 1 | 1 | 1 |
| 3 | Wuchang | 2 | 1716 | 50 | 2 | 1 |   | 1 |
| 3 | Wuchang | 2 | 1717 | 49 | 2 | 1 |   | 1 |
| 3 | Wuchang | 2 | 1718 | 78 | 3 | 1 | 1 |   |
| 3 | Wuchang | 2 | 1719 | 72 | 3 | 1 |   | 1 |
| 3 | Wuchang | 2 | 1720 | 59 | 2 | 1 | 1 |   |
| 3 | Wuchang | 2 | 1721 | 62 | 2 | 1 |   | 1 |
| 3 | Wuchang | 2 | 1722 | 32 | 2 | 2 |   | 1 |
| 3 | Wuchang | 2 | 1723 | 48 | 2 | 1 |   | 1 |
| 3 | Wuchang | 2 | 1724 | 55 | 2 | 1 | 1 |   |
| 3 | Wuchang | 2 | 1725 | 79 | 3 | 1 |   | 1 |
| 3 | Wuchang | 2 | 1726 | 41 | 2 | 2 |   | 1 |
| 3 | Wuchang | 2 | 1727 | 42 | 2 | 1 |   | 1 |
| 3 | Wuchang | 2 | 1728 | 64 | 2 | 2 | 1 | 1 |
| 3 | Wuchang | 2 | 1729 | 48 | 2 | 1 |   | 1 |
| 3 | Wuchang | 2 | 1730 | 37 | 2 | 1 |   | 1 |
| 3 | Wuchang | 2 | 1731 | 45 | 2 | 1 |   | 1 |
| 3 | Wuchang | 2 | 1732 | 47 | 2 | 1 |   | 1 |
| 3 | Wuchang | 2 | 1733 | 21 | 2 | 1 |   | 1 |
| 3 | Wuchang | 2 | 1734 | 25 | 2 | 2 |   | 1 |
| 3 | Wuchang | 2 | 1735 | 54 | 2 | 2 |   | 1 |
| 3 | Wuchang | 2 | 1736 | 51 | 2 | 1 |   | 1 |
| 3 | Wuchang | 2 | 1737 | 52 | 2 | 1 |   | 1 |
| 3 | Wuchang | 2 | 1738 | 48 | 2 | 1 |   | 1 |
| 3 | Wuchang | 2 | 1739 | 51 | 2 | 1 |   | 1 |
| 3 | Wuchang | 2 | 1740 | 11 | 1 | 1 |   | 1 |
| 3 | Wuchang | 2 | 1741 | 29 | 2 | 2 |   | 1 |
| 3 | Wuchang | 2 | 1742 | 30 | 2 | 1 |   | 1 |
| 3 | Wuchang | 2 | 1743 | 66 | 3 | 2 | 1 |   |
| 3 | Wuchang | 2 | 1744 | 53 | 2 | 2 | 1 |   |
| 3 | Wuchang | 2 | 1745 | 26 | 2 | 1 |   | 1 |
| 3 | Wuchang | 2 | 1746 | 43 | 2 | 1 | 1 | 1 |
| 3 | Wuchang | 2 | 1747 | 76 | 3 | 1 | 1 |   |
| 3 | Wuchang | 2 | 1748 | 73 | 3 | 2 | 1 |   |
| 3 | Wuchang | 2 | 1749 | 75 | 3 | 1 |   | 1 |

|   |         |   |      |    |   |   |   |   |
|---|---------|---|------|----|---|---|---|---|
| 3 | Wuchang | 2 | 1750 | 64 | 2 | 1 |   | 1 |
| 3 | Wuchang | 2 | 1751 | 67 | 3 | 2 | 1 |   |
| 3 | Wuchang | 2 | 1752 | 33 | 2 | 1 |   | 1 |
| 3 | Wuchang | 2 | 1753 | 62 | 2 | 1 | 1 | 1 |
| 3 | Wuchang | 2 | 1754 | 63 | 2 | 1 |   | 1 |
| 3 | Wuchang | 2 | 1755 | 61 | 2 | 1 |   | 1 |
| 3 | Wuchang | 2 | 1756 | 40 | 2 | 2 | 1 | 1 |
| 3 | Wuchang | 2 | 1757 | 37 | 2 | 1 |   | 1 |
| 3 | Wuchang | 2 | 1758 | 73 | 3 | 1 | 1 |   |
| 3 | Wuchang | 2 | 1759 | 56 | 2 | 1 |   | 1 |
| 3 | Wuchang | 2 | 1760 | 28 | 2 | 1 |   | 1 |
| 3 | Wuchang | 2 | 1761 | 65 | 3 | 1 |   | 1 |
| 3 | Wuchang | 2 | 1762 | 49 | 2 | 2 |   | 1 |
| 3 | Wuchang | 2 | 1763 | 47 | 2 | 1 |   | 1 |
| 3 | Wuchang | 2 | 1764 | 62 | 2 | 1 |   | 1 |
| 3 | Wuchang | 2 | 1765 | 52 | 2 | 2 |   | 1 |
| 3 | Wuchang | 2 | 1766 | 68 | 3 | 1 | 1 | 1 |
| 3 | Wuchang | 2 | 1767 | 64 | 2 | 2 |   | 1 |
| 3 | Wuchang | 2 | 1768 | 25 | 2 | 1 |   | 1 |
| 3 | Wuchang | 2 | 1769 | 26 | 2 | 1 |   | 1 |
| 3 | Wuchang | 2 | 1770 | 66 | 3 | 1 |   | 1 |
| 3 | Wuchang | 2 | 1771 | 40 | 2 | 1 | 1 |   |
| 3 | Wuchang | 2 | 1772 | 71 | 3 | 1 |   | 1 |
| 3 | Wuchang | 2 | 1773 | 49 | 2 | 2 |   | 1 |
| 3 | Wuchang | 2 | 1774 | 37 | 2 | 1 |   | 1 |
| 3 | Wuchang | 2 | 1775 | 25 | 2 | 1 | 1 |   |
| 3 | Wuchang | 2 | 1776 | 37 | 2 | 1 |   | 1 |
| 3 | Wuchang | 2 | 1777 | 25 | 2 | 1 | 1 |   |
| 3 | Wuchang | 2 | 1778 | 74 | 3 | 1 | 1 | 1 |
| 3 | Wuchang | 2 | 1779 | 65 | 3 | 1 |   | 1 |
| 3 | Wuchang | 2 | 1780 | 67 | 3 | 1 |   | 1 |
| 3 | Wuchang | 2 | 1781 | 65 | 3 | 1 |   | 1 |
| 3 | Wuchang | 2 | 1782 | 21 | 2 | 1 |   | 1 |
| 3 | Wuchang | 2 | 1783 | 72 | 3 | 1 | 1 | 1 |
| 3 | Wuchang | 2 | 1784 | 62 | 2 | 1 |   | 1 |
| 3 | Wuchang | 2 | 1785 | 33 | 2 | 1 |   | 1 |
| 3 | Wuchang | 2 | 1786 | 48 | 2 | 2 |   | 1 |
| 3 | Wuchang | 2 | 1787 | 40 | 2 | 1 | 1 |   |
| 3 | Wuchang | 2 | 1788 | 66 | 3 | 1 | 1 | 1 |
| 3 | Wuchang | 2 | 1789 | 69 | 3 | 1 |   | 1 |
| 3 | Wuchang | 2 | 1790 | 47 | 2 | 1 |   | 1 |
| 3 | Wuchang | 2 | 1791 | 66 | 3 | 1 | 1 |   |
| 3 | Wuchang | 2 | 1792 | 55 | 2 | 1 |   | 1 |
| 3 | Wuchang | 2 | 1793 | 59 | 2 | 1 |   | 1 |
| 3 | Wuchang | 2 | 1794 | 18 | 2 | 2 | 1 |   |
| 3 | Wuchang | 2 | 1795 | 61 | 2 | 1 | 1 | 1 |
| 3 | Wuchang | 2 | 1796 | 57 | 2 | 1 |   | 1 |
| 3 | Wuchang | 2 | 1797 | 53 | 2 | 1 | 1 | 1 |
| 3 | Wuchang | 2 | 1798 | 19 | 2 | 2 | 1 |   |
| 3 | Wuchang | 2 | 1799 | 53 | 2 | 1 |   | 1 |
| 3 | Wuchang | 2 | 1800 | 18 | 2 | 1 | 1 |   |
| 3 | Wuchang | 2 | 1801 | 53 | 2 | 1 |   | 1 |
| 3 | Wuchang | 2 | 1802 | 37 | 2 | 1 |   | 1 |
| 3 | Wuchang | 2 | 1803 | 58 | 2 | 1 |   | 1 |

|   |         |   |      |    |   |   |   |   |
|---|---------|---|------|----|---|---|---|---|
| 3 | Wuchang | 2 | 1804 | 76 | 3 | 1 | 1 |   |
| 3 | Wuchang | 2 | 1805 | 40 | 2 | 2 |   | 1 |
| 3 | Wuchang | 2 | 1806 | 63 | 2 | 2 | 1 | 1 |
| 3 | Wuchang | 2 | 1807 | 56 | 2 | 1 |   | 1 |
| 3 | Wuchang | 2 | 1808 | 62 | 2 | 2 | 1 |   |
| 3 | Wuchang | 2 | 1809 | 43 | 2 | 1 | 1 |   |
| 3 | Wuchang | 2 | 1810 | 64 | 2 | 2 |   | 1 |
| 3 | Wuchang | 2 | 1811 | 75 | 3 | 1 |   | 1 |
| 3 | Wuchang | 2 | 1812 | 54 | 2 | 1 |   | 1 |
| 3 | Wuchang | 2 | 1813 | 49 | 2 | 1 |   | 1 |
| 3 | Wuchang | 2 | 1814 | 42 | 2 | 1 |   | 1 |
| 3 | Wuchang | 2 | 1815 | 39 | 2 | 2 | 1 | 1 |
| 3 | Wuchang | 2 | 1816 | 49 | 2 | 1 |   | 1 |
| 3 | Wuchang | 2 | 1817 | 29 | 2 | 1 |   | 1 |
| 3 | Wuchang | 2 | 1818 | 33 | 2 | 1 |   | 1 |
| 3 | Wuchang | 2 | 1819 | 27 | 2 | 1 |   | 1 |
| 3 | Wuchang | 2 | 1820 | 72 | 3 | 1 |   | 1 |
| 3 | Wuchang | 2 | 1821 | 16 | 2 | 2 |   | 1 |
| 3 | Wuchang | 2 | 1822 | 62 | 2 | 1 |   | 1 |
| 3 | Wuchang | 2 | 1823 | 63 | 2 | 1 | 1 |   |
| 3 | Wuchang | 2 | 1824 | 57 | 2 | 1 |   | 1 |
| 3 | Wuchang | 2 | 1825 | 49 | 2 | 1 | 1 |   |
| 3 | Wuchang | 2 | 1826 | 30 | 2 | 1 | 1 | 1 |
| 3 | Wuchang | 2 | 1827 | 54 | 2 | 1 | 1 |   |
| 3 | Wuchang | 2 | 1828 | 46 | 2 | 2 |   | 1 |
| 3 | Wuchang | 2 | 1829 | 49 | 2 | 2 |   | 1 |
| 3 | Wuchang | 2 | 1830 | 60 | 2 | 2 |   | 1 |
| 3 | Wuchang | 2 | 1831 | 36 | 2 | 1 |   | 1 |
| 3 | Wuchang | 2 | 1832 | 59 | 2 | 2 |   | 1 |
| 3 | Wuchang | 2 | 1833 | 77 | 3 | 1 |   | 1 |
| 3 | Wuchang | 2 | 1834 | 41 | 2 | 1 |   | 1 |
| 3 | Wuchang | 2 | 1835 | 22 | 2 | 1 | 1 | 1 |
| 3 | Wuchang | 2 | 1836 | 27 | 2 | 1 | 1 |   |
| 3 | Wuchang | 2 | 1837 | 49 | 2 | 1 | 1 | 1 |
| 3 | Wuchang | 2 | 1838 | 28 | 2 | 2 |   | 1 |
| 3 | Wuchang | 2 | 1839 | 51 | 2 | 1 |   | 1 |
| 3 | Wuchang | 2 | 1840 | 57 | 2 | 2 |   | 1 |
| 3 | Wuchang | 2 | 1841 | 44 | 2 | 2 |   | 1 |
| 3 | Wuchang | 2 | 1842 | 22 | 2 | 1 | 1 |   |
| 3 | Wuchang | 2 | 1843 | 56 | 2 | 1 | 1 |   |
| 3 | Wuchang | 2 | 1844 | 49 | 2 | 1 | 1 |   |
| 3 | Wuchang | 2 | 1845 | 47 | 2 | 1 | 1 |   |
| 3 | Wuchang | 2 | 1846 | 22 | 2 | 2 |   | 1 |
| 3 | Wuchang | 2 | 1847 | 63 | 2 | 1 |   | 1 |
| 3 | Wuchang | 2 | 1848 | 62 | 2 | 1 |   | 1 |
| 3 | Wuchang | 2 | 1849 | 49 | 2 | 1 | 1 | 1 |
| 3 | Wuchang | 2 | 1850 | 60 | 2 | 2 |   | 1 |
| 3 | Wuchang | 2 | 1851 | 64 | 2 | 2 |   | 1 |
| 3 | Wuchang | 2 | 1852 | 73 | 3 | 2 | 1 |   |
| 3 | Wuchang | 2 | 1853 | 49 | 2 | 1 |   | 1 |
| 3 | Wuchang | 2 | 1854 | 65 | 3 | 1 |   | 1 |
| 3 | Wuchang | 2 | 1855 | 43 | 2 | 1 |   | 1 |
| 3 | Wuchang | 2 | 1856 | 58 | 2 | 1 |   | 1 |
| 3 | Wuchang | 2 | 1857 | 41 | 2 | 2 |   | 1 |

|   |         |   |      |    |   |   |   |   |
|---|---------|---|------|----|---|---|---|---|
| 3 | Wuchang | 2 | 1858 | 60 | 2 | 1 | 1 | 1 |
| 3 | Wuchang | 2 | 1859 | 45 | 2 | 1 |   | 1 |
| 3 | Wuchang | 2 | 1860 | 24 | 2 | 1 |   | 1 |
| 3 | Wuchang | 2 | 1861 | 19 | 2 | 2 |   | 1 |
| 3 | Wuchang | 2 | 1862 | 72 | 3 | 1 |   | 1 |
| 3 | Wuchang | 2 | 1863 | 70 | 3 | 1 | 1 |   |
| 3 | Wuchang | 2 | 1864 | 39 | 2 | 1 |   | 1 |
| 3 | Wuchang | 2 | 1865 | 49 | 2 | 1 |   | 1 |
| 3 | Wuchang | 2 | 1866 | 50 | 2 | 2 | 1 |   |
| 3 | Wuchang | 2 | 1867 | 43 | 2 | 1 |   | 1 |
| 3 | Wuchang | 2 | 1868 | 50 | 2 | 2 |   | 1 |
| 3 | Wuchang | 2 | 1869 | 62 | 2 | 2 |   | 1 |
| 3 | Wuchang | 2 | 1870 | 16 | 2 | 2 |   | 1 |
| 3 | Wuchang | 2 | 1871 | 61 | 2 | 1 | 1 |   |
| 3 | Wuchang | 2 | 1872 | 40 | 2 | 1 |   | 1 |
| 3 | Wuchang | 2 | 1873 | 56 | 2 | 2 | 1 | 1 |
| 3 | Wuchang | 2 | 1874 | 70 | 3 | 2 |   | 1 |
| 3 | Wuchang | 2 | 1875 | 77 | 3 | 2 |   | 1 |
| 3 | Wuchang | 2 | 1876 | 46 | 2 | 2 |   | 1 |
| 3 | Wuchang | 2 | 1877 | 22 | 2 | 1 | 1 |   |
| 3 | Wuchang | 2 | 1878 | 48 | 2 | 2 |   | 1 |
| 3 | Wuchang | 2 | 1879 | 61 | 2 | 1 |   | 1 |
| 3 | Wuchang | 2 | 1880 | 66 | 3 | 1 |   | 1 |
| 3 | Wuchang | 2 | 1881 | 60 | 2 | 2 |   | 1 |
| 3 | Wuchang | 2 | 1882 | 49 | 2 | 1 |   | 1 |
| 3 | Wuchang | 2 | 1883 | 31 | 2 | 2 |   | 1 |
| 3 | Wuchang | 2 | 1884 | 46 | 2 | 1 |   | 1 |
| 3 | Wuchang | 2 | 1885 | 69 | 3 | 1 |   | 1 |
| 3 | Wuchang | 2 | 1886 | 59 | 2 | 1 |   | 1 |
| 3 | Wuchang | 2 | 1887 | 76 | 3 | 2 | 1 |   |
| 3 | Wuchang | 2 | 1888 | 78 | 3 | 1 | 1 |   |
| 3 | Wuchang | 2 | 1889 | 42 | 2 | 1 | 1 |   |
| 3 | Wuchang | 2 | 1890 | 80 | 3 | 2 | 1 | 1 |
| 3 | Wuchang | 2 | 1891 | 28 | 2 | 1 |   | 1 |
| 3 | Wuchang | 2 | 1892 | 53 | 2 | 1 |   | 1 |
| 3 | Wuchang | 2 | 1893 | 48 | 2 | 2 | 1 | 1 |
| 3 | Wuchang | 2 | 1894 | 31 | 2 | 2 |   | 1 |
| 3 | Wuchang | 2 | 1895 | 58 | 2 | 2 |   | 1 |
| 3 | Wuchang | 2 | 1896 | 27 | 2 | 2 |   | 1 |
| 3 | Wuchang | 2 | 1897 | 51 | 2 | 1 | 1 |   |
| 3 | Wuchang | 2 | 1898 | 42 | 2 | 1 |   | 1 |
| 3 | Wuchang | 2 | 1899 | 42 | 2 | 1 |   | 1 |
| 3 | Wuchang | 2 | 1900 | 58 | 2 | 1 |   | 1 |
| 3 | Wuchang | 2 | 1901 | 65 | 3 | 1 |   | 1 |
| 3 | Wuchang | 2 | 1902 | 53 | 2 | 2 | 1 |   |
| 3 | Wuchang | 2 | 1903 | 51 | 2 | 1 |   | 1 |
| 3 | Wuchang | 2 | 1904 | 41 | 2 | 2 |   | 1 |
| 3 | Wuchang | 2 | 1905 | 74 | 3 | 1 |   | 1 |
| 3 | Wuchang | 2 | 1906 | 51 | 2 | 1 |   | 1 |
| 3 | Wuchang | 2 | 1907 | 64 | 2 | 1 |   | 1 |
| 3 | Wuchang | 2 | 1908 | 50 | 2 | 1 |   | 1 |
| 3 | Wuchang | 2 | 1909 | 37 | 2 | 1 | 1 |   |
| 3 | Wuchang | 2 | 1910 | 21 | 2 | 1 | 1 |   |
| 3 | Wuchang | 2 | 1911 | 54 | 2 | 1 |   | 1 |

|   |         |   |      |    |   |   |   |   |
|---|---------|---|------|----|---|---|---|---|
| 3 | Wuchang | 2 | 1912 | 77 | 3 | 1 |   | 1 |
| 3 | Wuchang | 2 | 1913 | 59 | 2 | 1 |   | 1 |
| 3 | Wuchang | 2 | 1914 | 69 | 3 | 1 |   | 1 |
| 3 | Wuchang | 2 | 1915 | 60 | 2 | 1 |   | 1 |
| 3 | Wuchang | 2 | 1916 | 24 | 2 | 2 |   | 1 |
| 3 | Wuchang | 2 | 1917 | 52 | 2 | 1 |   | 1 |
| 3 | Wuchang | 2 | 1918 | 64 | 2 | 2 | 1 |   |
| 3 | Wuchang | 2 | 1919 | 57 | 2 | 2 | 1 |   |
| 3 | Wuchang | 2 | 1920 | 50 | 2 | 1 | 1 | 1 |
| 3 | Wuchang | 2 | 1921 | 55 | 2 | 1 |   | 1 |
| 3 | Wuchang | 2 | 1922 | 59 | 2 | 2 |   | 1 |
| 3 | Wuchang | 2 | 1923 | 45 | 2 | 2 |   | 1 |
| 3 | Wuchang | 2 | 1924 | 25 | 2 | 1 |   | 1 |
| 3 | Wuchang | 2 | 1925 | 55 | 2 | 2 |   | 1 |
| 3 | Wuchang | 2 | 1926 | 61 | 2 | 1 |   | 1 |
| 3 | Wuchang | 2 | 1927 | 29 | 2 | 2 |   | 1 |
| 3 | Wuchang | 2 | 1928 | 57 | 2 | 1 |   | 1 |
| 3 | Wuchang | 2 | 1929 | 71 | 3 | 1 |   | 1 |
| 3 | Wuchang | 2 | 1930 | 48 | 2 | 1 |   | 1 |
| 3 | Wuchang | 2 | 1931 | 49 | 2 | 1 | 1 | 1 |
| 3 | Wuchang | 2 | 1932 | 27 | 2 | 1 | 1 |   |
| 3 | Wuchang | 2 | 1933 | 59 | 2 | 2 |   | 1 |
| 3 | Wuchang | 2 | 1934 | 72 | 3 | 1 |   | 1 |
| 3 | Wuchang | 2 | 1935 | 68 | 3 | 2 | 1 |   |
| 3 | Wuchang | 2 | 1936 | 53 | 2 | 1 |   | 1 |
| 3 | Wuchang | 2 | 1937 | 70 | 3 | 1 |   | 1 |
| 3 | Wuchang | 2 | 1938 | 53 | 2 | 1 | 1 |   |
| 3 | Wuchang | 2 | 1939 | 43 | 2 | 1 | 1 |   |
| 3 | Wuchang | 2 | 1940 | 61 | 2 | 1 | 1 | 1 |
| 3 | Wuchang | 2 | 1941 | 69 | 3 | 2 |   | 1 |
| 3 | Wuchang | 2 | 1942 | 52 | 2 | 1 |   | 1 |
| 3 | Wuchang | 2 | 1943 | 47 | 2 | 1 | 1 |   |
| 3 | Wuchang | 2 | 1944 | 19 | 2 | 2 |   | 1 |
| 3 | Wuchang | 2 | 1945 | 42 | 2 | 2 |   | 1 |
| 3 | Wuchang | 2 | 1946 | 62 | 2 | 1 | 1 | 1 |
| 3 | Wuchang | 2 | 1947 | 48 | 2 | 1 | 1 | 1 |
| 3 | Wuchang | 2 | 1948 | 53 | 2 | 2 |   | 1 |
| 3 | Wuchang | 2 | 1949 | 21 | 2 | 1 |   | 1 |
| 3 | Wuchang | 2 | 1950 | 54 | 2 | 1 | 1 |   |
| 3 | Wuchang | 2 | 1951 | 69 | 3 | 1 |   | 1 |
| 3 | Wuchang | 2 | 1952 | 63 | 2 | 2 | 1 | 1 |
| 3 | Wuchang | 2 | 1953 | 61 | 2 | 1 |   | 1 |
| 3 | Wuchang | 2 | 1954 | 68 | 3 | 1 |   | 1 |
| 3 | Wuchang | 2 | 1955 | 38 | 2 | 1 |   | 1 |
| 3 | Wuchang | 2 | 1956 | 68 | 3 | 1 |   | 1 |
| 3 | Wuchang | 2 | 1957 | 55 | 2 | 1 |   | 1 |
| 3 | Wuchang | 2 | 1958 | 75 | 3 | 1 |   | 1 |
| 3 | Wuchang | 2 | 1959 | 21 | 2 | 2 |   | 1 |
| 3 | Wuchang | 2 | 1960 | 20 | 2 | 2 |   | 1 |
| 3 | Wuchang | 2 | 1961 | 59 | 2 | 1 |   | 1 |
| 3 | Wuchang | 2 | 1962 | 50 | 2 | 1 |   | 1 |
| 3 | Wuchang | 2 | 1963 | 49 | 2 | 1 |   | 1 |
| 3 | Wuchang | 2 | 1964 | 22 | 2 | 2 |   | 1 |
| 3 | Wuchang | 2 | 1965 | 81 | 3 | 2 |   | 1 |

|   |         |   |      |    |   |   |   |   |
|---|---------|---|------|----|---|---|---|---|
| 3 | Wuchang | 2 | 1966 | 81 | 3 | 1 |   | 1 |
| 3 | Wuchang | 2 | 1967 | 15 | 2 | 2 |   | 1 |
| 3 | Wuchang | 2 | 1968 | 39 | 2 | 1 |   | 1 |
| 3 | Wuchang | 2 | 1969 | 37 | 2 | 2 |   | 1 |
| 3 | Wuchang | 2 | 1970 | 55 | 2 | 1 |   | 1 |
| 3 | Wuchang | 2 | 1971 | 40 | 2 | 2 |   | 1 |
| 3 | Wuchang | 2 | 1972 | 61 | 2 | 1 | 2 |   |
| 3 | Wuchang | 2 | 1973 | 78 | 3 | 1 | 2 |   |
| 3 | Wuchang | 2 | 1974 | 30 | 2 | 2 | 2 |   |
| 3 | Wuchang | 2 | 1975 | 81 | 3 | 1 | 2 |   |
| 3 | Wuchang | 2 | 1976 | 67 | 3 | 1 | 2 |   |
| 3 | Wuchang | 2 | 1977 | 49 | 2 | 1 | 2 |   |
| 3 | Wuchang | 2 | 1978 | 50 | 2 | 1 | 2 |   |
| 3 | Wuchang | 2 | 1979 | 19 | 2 | 2 | 2 |   |
| 3 | Wuchang | 2 | 1980 | 27 | 2 | 1 | 2 |   |
| 3 | Wuchang | 2 | 1981 | 72 | 3 | 1 | 2 |   |
| 3 | Wuchang | 2 | 1982 | 56 | 2 | 1 | 2 |   |
| 3 | Wuchang | 2 | 1983 | 46 | 2 | 2 | 2 |   |
| 3 | Wuchang | 2 | 1984 | 69 | 3 | 2 | 2 |   |
| 3 | Wuchang | 2 | 1985 | 61 | 2 | 1 | 2 |   |
| 3 | Wuchang | 2 | 1986 | 64 | 2 | 1 | 2 |   |
| 3 | Wuchang | 2 | 1987 | 53 | 2 | 1 | 2 |   |
| 3 | Wuchang | 2 | 1988 | 60 | 2 | 1 | 2 |   |
| 3 | Wuchang | 2 | 1989 | 67 | 3 | 1 | 2 |   |
| 3 | Wuchang | 2 | 1990 | 65 | 3 | 1 | 2 |   |
| 3 | Wuchang | 2 | 1991 | 65 | 3 | 1 | 2 |   |
| 3 | Wuchang | 2 | 1992 | 32 | 2 | 2 | 2 |   |
| 3 | Wuchang | 2 | 1993 | 43 | 2 | 1 | 2 |   |
| 3 | Wuchang | 2 | 1994 | 71 | 3 | 1 | 2 |   |
| 3 | Wuchang | 2 | 1995 | 51 | 2 | 1 | 2 |   |
| 3 | Wuchang | 2 | 1996 | 52 | 2 | 2 | 2 |   |
| 3 | Wuchang | 2 | 1997 | 50 | 2 | 1 | 2 |   |
| 3 | Wuchang | 2 | 1998 | 61 | 2 | 1 | 2 |   |
| 3 | Wuchang | 2 | 1999 | 52 | 2 | 1 | 2 |   |
| 3 | Wuchang | 2 | 2000 | 63 | 2 | 1 | 2 |   |
| 3 | Wuchang | 2 | 2001 | 70 | 3 | 1 | 2 |   |
| 3 | Wuchang | 2 | 2002 | 55 | 2 | 1 | 2 |   |
| 3 | Wuchang | 2 | 2003 | 25 | 2 | 1 | 2 |   |
| 3 | Wuchang | 2 | 2004 | 37 | 2 | 1 | 2 |   |
| 3 | Wuchang | 2 | 2005 | 28 | 2 | 1 | 2 |   |
| 3 | Wuchang | 2 | 2006 | 22 | 2 | 1 | 2 |   |
| 3 | Wuchang | 2 | 2007 | 52 | 2 | 2 | 2 |   |
| 3 | Wuchang | 2 | 2008 | 47 | 2 | 2 | 2 |   |
| 3 | Wuchang | 2 | 2009 | 82 | 3 | 2 | 2 |   |
| 3 | Wuchang | 2 | 2010 | 81 | 3 | 2 | 2 |   |
| 3 | Wuchang | 2 | 2011 | 70 | 3 | 1 | 2 |   |
| 3 | Wuchang | 2 | 2012 | 34 | 2 | 1 | 2 |   |
| 3 | Wuchang | 2 | 2013 | 60 | 2 | 2 | 2 |   |
| 3 | Wuchang | 2 | 2014 | 54 | 2 | 1 | 2 |   |
| 3 | Wuchang | 2 | 2015 | 75 | 3 | 1 | 2 |   |
| 3 | Wuchang | 2 | 2016 | 70 | 3 | 1 | 2 |   |
| 3 | Wuchang | 2 | 2017 | 63 | 2 | 1 | 2 |   |
| 3 | Wuchang | 2 | 2018 | 80 | 3 | 1 | 2 |   |
| 3 | Wuchang | 2 | 2019 | 56 | 2 | 1 | 2 |   |

|   |         |   |      |    |   |   |   |  |
|---|---------|---|------|----|---|---|---|--|
| 3 | Wuchang | 2 | 2020 | 42 | 2 | 1 | 2 |  |
| 3 | Wuchang | 2 | 2021 | 65 | 3 | 1 | 2 |  |
| 3 | Wuchang | 2 | 2022 | 54 | 2 | 1 | 2 |  |
| 3 | Wuchang | 2 | 2023 | 81 | 3 | 2 | 2 |  |
| 3 | Wuchang | 2 | 2024 | 22 | 2 | 2 | 2 |  |
| 3 | Wuchang | 2 | 2025 | 55 | 2 | 1 | 2 |  |
| 3 | Wuchang | 2 | 2026 | 27 | 2 | 2 | 2 |  |
| 3 | Wuchang | 2 | 2027 | 42 | 2 | 1 | 2 |  |
| 3 | Wuchang | 2 | 2028 | 51 | 2 | 1 | 2 |  |
| 3 | Wuchang | 2 | 2029 | 82 | 3 | 1 | 2 |  |
| 3 | Wuchang | 2 | 2030 | 67 | 3 | 1 | 2 |  |
| 3 | Wuchang | 2 | 2031 | 45 | 2 | 1 | 2 |  |
| 3 | Wuchang | 2 | 2032 | 84 | 3 | 1 | 2 |  |
| 3 | Wuchang | 2 | 2033 | 62 | 2 | 1 | 2 |  |
| 3 | Wuchang | 2 | 2034 | 35 | 2 | 1 | 2 |  |
| 3 | Wuchang | 2 | 2035 | 56 | 2 | 1 | 2 |  |
| 3 | Wuchang | 2 | 2036 | 55 | 2 | 1 | 2 |  |
| 3 | Wuchang | 2 | 2037 | 40 | 2 | 1 | 2 |  |
| 3 | Wuchang | 2 | 2038 | 71 | 3 | 1 | 2 |  |
| 3 | Wuchang | 2 | 2039 | 49 | 2 | 2 | 2 |  |
| 3 | Wuchang | 2 | 2040 | 50 | 2 | 2 | 2 |  |
| 3 | Wuchang | 2 | 2041 | 67 | 3 | 1 | 2 |  |
| 3 | Wuchang | 2 | 2042 | 42 | 2 | 2 | 2 |  |
| 3 | Wuchang | 2 | 2043 | 75 | 3 | 1 | 2 |  |
| 3 | Wuchang | 2 | 2044 | 15 | 2 | 2 | 2 |  |
| 3 | Wuchang | 2 | 2045 | 63 | 2 | 1 | 2 |  |
| 3 | Wuchang | 2 | 2046 | 43 | 2 | 2 | 2 |  |
| 3 | Wuchang | 2 | 2047 | 44 | 2 | 1 | 2 |  |
| 3 | Wuchang | 2 | 2048 | 64 | 2 | 1 | 2 |  |
| 3 | Wuchang | 2 | 2049 | 64 | 2 | 1 | 2 |  |
| 3 | Wuchang | 2 | 2050 | 75 | 3 | 2 | 2 |  |
| 3 | Wuchang | 2 | 2051 | 78 | 3 | 1 | 2 |  |
| 3 | Wuchang | 2 | 2052 | 72 | 3 | 1 | 2 |  |
| 3 | Wuchang | 2 | 2053 | 16 | 2 | 1 | 2 |  |
| 3 | Wuchang | 2 | 2054 | 85 | 3 | 1 | 2 |  |
| 3 | Wuchang | 2 | 2055 | 74 | 3 | 1 | 2 |  |
| 3 | Wuchang | 2 | 2056 | 58 | 2 | 1 | 2 |  |
| 3 | Wuchang | 2 | 2057 | 45 | 2 | 1 | 2 |  |
| 3 | Wuchang | 2 | 2058 | 52 | 2 | 1 | 2 |  |
| 3 | Wuchang | 2 | 2059 | 52 | 2 | 1 | 2 |  |
| 3 | Wuchang | 2 | 2060 | 66 | 3 | 1 | 2 |  |
| 3 | Wuchang | 2 | 2061 | 65 | 3 | 2 | 2 |  |
| 3 | Wuchang | 2 | 2062 | 66 | 3 | 1 | 2 |  |
| 3 | Wuchang | 2 | 2063 | 65 | 3 | 1 | 2 |  |
| 3 | Wuchang | 2 | 2064 | 56 | 2 | 1 | 2 |  |
| 3 | Wuchang | 2 | 2065 | 19 | 2 | 2 | 2 |  |
| 3 | Wuchang | 2 | 2066 | 56 | 2 | 1 | 2 |  |
| 3 | Wuchang | 2 | 2067 | 53 | 2 | 2 | 2 |  |
| 3 | Wuchang | 2 | 2068 | 36 | 2 | 1 | 2 |  |
| 3 | Wuchang | 2 | 2069 | 52 | 2 | 1 | 2 |  |
| 3 | Wuchang | 2 | 2070 | 65 | 3 | 2 | 2 |  |
| 3 | Wuchang | 2 | 2071 | 69 | 3 | 1 | 2 |  |
| 3 | Wuchang | 2 | 2072 | 60 | 2 | 1 | 2 |  |
| 3 | Wuchang | 2 | 2073 | 35 | 2 | 1 | 2 |  |

|   |         |   |      |    |   |   |   |  |
|---|---------|---|------|----|---|---|---|--|
| 3 | Wuchang | 2 | 2074 | 74 | 3 | 1 | 2 |  |
| 3 | Wuchang | 2 | 2075 | 32 | 2 | 1 | 2 |  |
| 3 | Wuchang | 2 | 2076 | 74 | 3 | 1 | 2 |  |
| 3 | Wuchang | 2 | 2077 | 45 | 2 | 2 | 2 |  |
| 3 | Wuchang | 2 | 2078 | 69 | 3 | 1 | 2 |  |
| 3 | Wuchang | 2 | 2079 | 35 | 2 | 1 | 2 |  |
| 3 | Wuchang | 2 | 2080 | 20 | 2 | 2 | 2 |  |
| 3 | Wuchang | 2 | 2081 | 60 | 2 | 1 | 2 |  |
| 3 | Wuchang | 2 | 2082 | 19 | 2 | 1 | 2 |  |
| 3 | Wuchang | 2 | 2083 | 17 | 2 | 2 | 2 |  |
| 3 | Wuchang | 2 | 2084 | 82 | 3 | 1 | 2 |  |
| 3 | Wuchang | 2 | 2085 | 48 | 2 | 1 | 2 |  |
| 3 | Wuchang | 2 | 2086 | 50 | 2 | 2 | 2 |  |
| 3 | Wuchang | 2 | 2087 | 52 | 2 | 1 | 2 |  |
| 3 | Wuchang | 2 | 2088 | 59 | 2 | 2 | 2 |  |
| 3 | Wuchang | 2 | 2089 | 77 | 3 | 2 | 2 |  |
| 3 | Wuchang | 2 | 2090 | 52 | 2 | 1 | 2 |  |
| 3 | Wuchang | 2 | 2091 | 59 | 2 | 2 | 2 |  |
| 3 | Wuchang | 2 | 2092 | 33 | 2 | 2 | 2 |  |
| 3 | Wuchang | 2 | 2093 | 36 | 2 | 1 | 2 |  |
| 3 | Wuchang | 2 | 2094 | 48 | 2 | 1 | 2 |  |
| 3 | Wuchang | 2 | 2095 | 49 | 2 | 1 | 2 |  |
| 3 | Wuchang | 2 | 2096 | 20 | 2 | 1 | 2 |  |
| 3 | Wuchang | 2 | 2097 | 53 | 2 | 1 | 2 |  |
| 3 | Wuchang | 2 | 2098 | 60 | 2 | 1 | 2 |  |
| 3 | Wuchang | 2 | 2099 | 47 | 2 | 2 | 2 |  |
| 3 | Wuchang | 2 | 2100 | 69 | 3 | 2 | 2 |  |
| 3 | Wuchang | 2 | 2101 | 66 | 3 | 1 | 2 |  |
| 3 | Wuchang | 2 | 2102 | 67 | 3 | 2 | 2 |  |
| 3 | Wuchang | 2 | 2103 | 47 | 2 | 1 | 2 |  |
| 3 | Wuchang | 2 | 2104 | 64 | 2 | 1 | 2 |  |
| 3 | Wuchang | 2 | 2105 | 44 | 2 | 2 | 2 |  |
| 3 | Wuchang | 2 | 2106 | 48 | 2 | 2 | 2 |  |
| 3 | Wuchang | 2 | 2107 | 73 | 3 | 1 | 2 |  |
| 3 | Wuchang | 2 | 2108 | 58 | 2 | 2 | 2 |  |
| 3 | Wuchang | 2 | 2109 | 59 | 2 | 1 | 2 |  |
| 3 | Wuchang | 2 | 2110 | 48 | 2 | 1 | 2 |  |
| 3 | Wuchang | 2 | 2111 | 62 | 2 | 2 | 2 |  |
| 3 | Wuchang | 2 | 2112 | 62 | 2 | 1 | 2 |  |
| 3 | Wuchang | 2 | 2113 | 53 | 2 | 1 | 2 |  |
| 3 | Wuchang | 2 | 2114 | 26 | 2 | 1 | 2 |  |
| 3 | Wuchang | 2 | 2115 | 14 | 1 | 2 | 2 |  |
| 3 | Wuchang | 2 | 2116 | 52 | 2 | 2 | 2 |  |
| 3 | Wuchang | 2 | 2117 | 78 | 3 | 1 | 2 |  |
| 3 | Wuchang | 2 | 2118 | 14 | 1 | 2 | 2 |  |
| 3 | Wuchang | 2 | 2119 | 26 | 2 | 1 | 2 |  |
| 3 | Wuchang | 2 | 2120 | 82 | 3 | 1 | 2 |  |
| 3 | Wuchang | 2 | 2121 | 37 | 2 | 2 | 2 |  |
| 3 | Wuchang | 2 | 2122 | 26 | 2 | 1 | 2 |  |
| 3 | Wuchang | 2 | 2123 | 67 | 3 | 1 | 2 |  |
| 3 | Wuchang | 2 | 2124 | 51 | 2 | 1 | 2 |  |
| 3 | Wuchang | 2 | 2125 | 19 | 2 | 1 | 2 |  |
| 3 | Wuchang | 2 | 2126 | 41 | 2 | 2 | 2 |  |
| 3 | Wuchang | 2 | 2127 | 60 | 2 | 2 | 2 |  |



|   |         |   |      |    |   |   |   |  |
|---|---------|---|------|----|---|---|---|--|
| 3 | Wuchang | 2 | 2128 | 55 | 2 | 1 | 2 |  |
| 3 | Wuchang | 2 | 2129 | 16 | 2 | 1 | 2 |  |
| 3 | Wuchang | 2 | 2130 | 55 | 2 | 1 | 2 |  |
| 3 | Wuchang | 2 | 2131 | 54 | 2 | 1 | 2 |  |
| 3 | Wuchang | 2 | 2132 | 45 | 2 | 1 | 2 |  |
| 3 | Wuchang | 2 | 2133 | 52 | 2 | 2 | 2 |  |
| 3 | Wuchang | 2 | 2134 | 59 | 2 | 1 | 2 |  |
| 3 | Wuchang | 2 | 2135 | 70 | 3 | 1 | 2 |  |
| 3 | Wuchang | 2 | 2136 | 45 | 2 | 1 | 2 |  |
| 3 | Wuchang | 2 | 2137 | 62 | 2 | 2 | 2 |  |
| 3 | Wuchang | 2 | 2138 | 60 | 2 | 2 | 2 |  |
| 3 | Wuchang | 2 | 2139 | 49 | 2 | 2 | 2 |  |
| 3 | Wuchang | 2 | 2140 | 67 | 3 | 2 | 2 |  |
| 3 | Wuchang | 2 | 2141 | 50 | 2 | 2 | 2 |  |
| 3 | Wuchang | 2 | 2142 | 70 | 3 | 1 | 2 |  |
| 3 | Wuchang | 2 | 2143 | 34 | 2 | 1 | 2 |  |
| 3 | Wuchang | 2 | 2144 | 50 | 2 | 1 | 2 |  |
| 3 | Wuchang | 2 | 2145 | 17 | 2 | 1 | 2 |  |
| 3 | Wuchang | 2 | 2146 | 82 | 3 | 1 | 2 |  |
| 3 | Wuchang | 2 | 2147 | 27 | 2 | 2 | 2 |  |
| 3 | Wuchang | 2 | 2148 | 72 | 3 | 1 | 2 |  |
| 3 | Wuchang | 2 | 2149 | 53 | 2 | 2 | 2 |  |
| 3 | Wuchang | 2 | 2150 | 50 | 2 | 1 | 2 |  |
| 3 | Wuchang | 2 | 2151 | 30 | 2 | 2 | 2 |  |
| 3 | Wuchang | 2 | 2152 | 69 | 3 | 1 | 2 |  |
| 3 | Wuchang | 2 | 2153 | 52 | 2 | 1 | 2 |  |
| 3 | Wuchang | 2 | 2154 | 70 | 3 | 2 | 2 |  |
| 3 | Wuchang | 2 | 2155 | 57 | 2 | 1 | 2 |  |
| 3 | Wuchang | 2 | 2156 | 27 | 2 | 2 | 2 |  |
| 3 | Wuchang | 2 | 2157 | 61 | 2 | 2 | 2 |  |
| 3 | Wuchang | 2 | 2158 | 58 | 2 | 1 | 2 |  |
| 3 | Wuchang | 2 | 2159 | 62 | 2 | 2 | 2 |  |
| 3 | Wuchang | 2 | 2160 | 58 | 2 | 1 | 2 |  |
| 3 | Wuchang | 2 | 2161 | 46 | 2 | 1 | 2 |  |
| 3 | Wuchang | 2 | 2162 | 34 | 2 | 1 | 2 |  |
| 3 | Wuchang | 2 | 2163 | 22 | 2 | 1 | 2 |  |
| 3 | Wuchang | 2 | 2164 | 50 | 2 | 1 | 2 |  |
| 3 | Wuchang | 2 | 2165 | 61 | 2 | 2 | 2 |  |
| 3 | Wuchang | 2 | 2166 | 67 | 3 | 1 | 2 |  |
| 3 | Wuchang | 2 | 2167 | 80 | 3 | 2 | 2 |  |
| 3 | Wuchang | 2 | 2168 | 70 | 3 | 1 | 2 |  |
| 3 | Wuchang | 2 | 2169 | 71 | 3 | 1 | 2 |  |
| 3 | Wuchang | 2 | 2170 | 54 | 2 | 1 | 2 |  |
| 3 | Wuchang | 2 | 2171 | 53 | 2 | 1 | 2 |  |
| 3 | Wuchang | 2 | 2172 | 54 | 2 | 1 | 2 |  |
| 3 | Wuchang | 2 | 2173 | 64 | 2 | 1 | 2 |  |
| 3 | Wuchang | 2 | 2174 | 70 | 3 | 1 | 2 |  |
| 3 | Wuchang | 2 | 2175 | 52 | 2 | 2 | 2 |  |
| 3 | Wuchang | 2 | 2176 | 43 | 2 | 1 | 2 |  |
| 3 | Wuchang | 2 | 2177 | 63 | 2 | 1 | 2 |  |
| 3 | Wuchang | 2 | 2178 | 43 | 2 | 1 | 2 |  |
| 3 | Wuchang | 2 | 2179 | 26 | 2 | 2 | 2 |  |
| 3 | Wuchang | 2 | 2180 | 54 | 2 | 2 | 2 |  |
| 3 | Wuchang | 2 | 2181 | 71 | 3 | 1 | 2 |  |

|   |         |   |      |    |   |   |   |   |
|---|---------|---|------|----|---|---|---|---|
| 3 | Wuchang | 2 | 2182 | 20 | 2 | 1 | 2 |   |
| 3 | Wuchang | 2 | 2183 | 68 | 3 | 1 | 2 |   |
| 3 | Wuchang | 2 | 2184 | 66 | 3 | 2 | 2 |   |
| 3 | Wuchang | 2 | 2185 | 68 | 3 | 2 | 2 |   |
| 3 | Wuchang | 2 | 2186 | 59 | 2 | 1 | 2 |   |
| 3 | Wuchang | 2 | 2187 | 68 | 3 | 2 | 2 |   |
| 3 | Wuchang | 2 | 2188 | 54 | 2 | 1 | 2 |   |
| 3 | Wuchang | 2 | 2189 | 60 | 2 | 2 | 2 |   |
| 3 | Wuchang | 2 | 2190 | 83 | 3 | 1 | 2 |   |
| 3 | Wuchang | 2 | 2191 | 56 | 2 | 1 | 2 |   |
| 3 | Wuchang | 2 | 2192 | 86 | 3 | 1 | 2 |   |
| 3 | Wuchang | 2 | 2193 | 35 | 2 | 2 | 2 |   |
| 3 | Wuchang | 2 | 2194 | 68 | 3 | 1 | 2 |   |
| 3 | Wuchang | 2 | 2195 | 70 | 3 | 1 | 2 |   |
| 3 | Wuchang | 2 | 2196 | 96 | 3 | 2 | 2 |   |
| 3 | Wuchang | 2 | 2197 | 72 | 3 | 2 | 2 |   |
| 3 | Wuchang | 2 | 2198 | 41 | 2 | 1 | 2 |   |
| 3 | Wuchang | 2 | 2199 | 56 | 2 | 1 | 2 |   |
| 3 | Wuchang | 2 | 2200 | 45 | 2 | 1 | 2 |   |
| 3 | Wuchang | 2 | 2201 | 50 | 2 | 1 | 2 |   |
| 3 | Wuchang | 2 | 2202 | 41 | 2 | 2 | 2 |   |
| 3 | Wuchang | 2 | 2203 | 56 | 2 | 1 | 2 |   |
| 3 | Wuchang | 2 | 2204 | 54 | 2 | 1 | 2 |   |
| 3 | Wuchang | 2 | 2205 | 49 | 2 | 2 | 2 |   |
| 3 | Wuchang | 2 | 2206 | 57 | 2 | 1 | 2 |   |
| 3 | Wuchang | 2 | 2207 | 49 | 2 | 1 | 2 |   |
| 3 | Wuchang | 2 | 2208 | 73 | 3 | 1 | 2 |   |
| 3 | Wuchang | 2 | 2209 | 32 | 2 | 1 | 2 |   |
| 3 | Wuchang | 2 | 2210 | 81 | 3 | 1 | 2 |   |
| 3 | Wuchang | 2 | 2211 | 53 | 2 | 1 | 2 |   |
| 3 | Wuchang | 2 | 2212 | 51 | 2 | 2 | 2 |   |
| 3 | Wuchang | 2 | 2213 | 66 | 3 | 1 | 2 |   |
| 3 | Wuchang | 2 | 2214 | 35 | 2 | 1 | 2 |   |
| 3 | Wuchang | 2 | 2215 | 54 | 2 | 1 | 2 |   |
| 3 | Wuchang | 2 | 2216 | 65 | 3 | 1 | 2 |   |
| 3 | Wuchang | 2 | 2217 | 47 | 2 | 2 | 2 |   |
| 3 | Wuchang | 2 | 2218 | 73 | 3 | 2 | 2 |   |
| 3 | Wuchang | 2 | 2219 | 80 | 3 | 2 | 2 |   |
| 3 | Wuchang | 2 | 2220 | 36 | 2 | 1 | 2 |   |
| 3 | Wuchang | 2 | 2221 | 51 | 2 | 2 | 2 |   |
| 3 | Wuchang | 2 | 2222 | 59 | 2 | 2 | 2 |   |
| 3 | Wuchang | 2 | 2223 | 47 | 2 | 1 | 2 |   |
| 3 | Wuchang | 2 | 2224 | 59 | 2 | 1 | 2 |   |
| 3 | Wuchang | 2 | 2225 | 57 | 2 | 2 | 2 |   |
| 3 | Wuchang | 2 | 2226 | 48 | 2 | 1 | 2 |   |
| 3 | Wuchang | 2 | 2227 | 53 | 2 | 1 | 2 |   |
| 3 | Wuchang | 2 | 2228 | 54 | 2 | 2 | 2 |   |
| 3 | Wuchang | 2 | 2229 | 67 | 3 | 1 |   | 1 |
| 3 | Wuchang | 2 | 2230 | 53 | 2 | 1 | 1 |   |
| 3 | Wuchang | 2 | 2231 | 45 | 2 | 2 |   | 1 |
| 3 | Wuchang | 2 | 2232 | 50 | 2 | 1 |   | 1 |
| 3 | Wuchang | 2 | 2233 | 57 | 2 | 1 | 1 |   |
| 3 | Wuchang | 2 | 2234 | 28 | 2 | 1 | 1 |   |
| 4 | Qiaokou | 2 | 2235 | 69 | 3 | 2 | 1 |   |

|   |         |   |      |    |   |   |   |  |
|---|---------|---|------|----|---|---|---|--|
| 4 | Qiaokou | 2 | 2236 | 58 | 2 | 1 | 1 |  |
| 4 | Qiaokou | 2 | 2237 | 81 | 3 | 2 | 1 |  |
| 4 | Qiaokou | 2 | 2238 | 40 | 2 | 1 | 1 |  |
| 4 | Qiaokou | 2 | 2239 | 55 | 2 | 2 | 1 |  |
| 4 | Qiaokou | 2 | 2240 | 52 | 2 | 1 | 1 |  |
| 4 | Qiaokou | 2 | 2241 | 70 | 3 | 1 | 1 |  |
| 4 | Qiaokou | 2 | 2242 | 81 | 3 | 1 | 1 |  |
| 4 | Qiaokou | 2 | 2243 | 41 | 2 | 1 | 1 |  |
| 4 | Qiaokou | 2 | 2244 | 35 | 2 | 1 | 1 |  |
| 4 | Qiaokou | 2 | 2245 | 36 | 2 | 2 | 1 |  |
| 4 | Qiaokou | 2 | 2246 | 58 | 2 | 2 | 1 |  |
| 4 | Qiaokou | 2 | 2247 | 45 | 2 | 2 | 1 |  |
| 4 | Qiaokou | 2 | 2248 | 52 | 2 | 1 | 1 |  |
| 4 | Qiaokou | 2 | 2249 | 66 | 3 | 1 | 1 |  |
| 4 | Qiaokou | 2 | 2250 | 42 | 2 | 2 | 1 |  |
| 4 | Qiaokou | 2 | 2251 | 34 | 2 | 2 | 1 |  |
| 4 | Qiaokou | 2 | 2252 | 57 | 2 | 1 | 1 |  |
| 4 | Qiaokou | 2 | 2253 | 60 | 2 | 2 | 1 |  |
| 4 | Qiaokou | 2 | 2254 | 21 | 2 | 2 | 1 |  |
| 4 | Qiaokou | 2 | 2255 | 52 | 2 | 1 | 1 |  |
| 4 | Qiaokou | 2 | 2256 | 60 | 2 | 1 | 1 |  |
| 4 | Qiaokou | 2 | 2257 | 53 | 2 | 2 | 1 |  |
| 4 | Qiaokou | 2 | 2258 | 48 | 2 | 1 | 1 |  |
| 4 | Qiaokou | 2 | 2259 | 14 | 1 | 1 | 1 |  |
| 4 | Qiaokou | 2 | 2260 | 46 | 2 | 1 | 1 |  |
| 4 | Qiaokou | 2 | 2261 | 69 | 3 | 1 | 1 |  |
| 4 | Qiaokou | 2 | 2262 | 65 | 3 | 1 | 1 |  |
| 4 | Qiaokou | 2 | 2263 | 67 | 3 | 1 | 1 |  |
| 4 | Qiaokou | 2 | 2264 | 52 | 2 | 1 | 1 |  |
| 4 | Qiaokou | 2 | 2265 | 59 | 2 | 2 | 1 |  |
| 4 | Qiaokou | 2 | 2266 | 40 | 2 | 1 | 1 |  |
| 4 | Qiaokou | 2 | 2267 | 33 | 2 | 1 | 1 |  |
| 4 | Qiaokou | 2 | 2268 | 67 | 3 | 1 | 1 |  |
| 4 | Qiaokou | 2 | 2269 | 38 | 2 | 1 | 1 |  |
| 4 | Qiaokou | 2 | 2270 | 66 | 3 | 2 | 1 |  |
| 4 | Qiaokou | 2 | 2271 | 73 | 3 | 2 | 1 |  |
| 4 | Qiaokou | 2 | 2272 | 58 | 2 | 1 | 1 |  |
| 4 | Qiaokou | 2 | 2273 | 58 | 2 | 1 | 1 |  |
| 4 | Qiaokou | 2 | 2274 | 58 | 2 | 1 | 1 |  |
| 4 | Qiaokou | 2 | 2275 | 33 | 2 | 2 | 1 |  |
| 4 | Qiaokou | 2 | 2276 | 67 | 3 | 2 | 1 |  |
| 4 | Qiaokou | 2 | 2277 | 74 | 3 | 1 | 1 |  |
| 4 | Qiaokou | 2 | 2278 | 37 | 2 | 1 | 1 |  |
| 4 | Qiaokou | 2 | 2279 | 39 | 2 | 2 | 1 |  |
| 4 | Qiaokou | 2 | 2280 | 63 | 2 | 1 | 1 |  |
| 4 | Qiaokou | 2 | 2281 | 67 | 3 | 1 | 1 |  |
| 4 | Qiaokou | 2 | 2282 | 73 | 3 | 2 | 1 |  |
| 4 | Qiaokou | 2 | 2283 | 53 | 2 | 1 | 1 |  |
| 4 | Qiaokou | 2 | 2284 | 59 | 2 | 1 | 1 |  |
| 4 | Qiaokou | 2 | 2285 | 14 | 1 | 2 | 1 |  |
| 4 | Qiaokou | 2 | 2286 | 28 | 2 | 1 | 1 |  |
| 4 | Qiaokou | 2 | 2287 | 45 | 2 | 2 | 1 |  |
| 4 | Qiaokou | 2 | 2288 | 64 | 2 | 1 | 1 |  |
| 4 | Qiaokou | 2 | 2289 | 80 | 3 | 1 | 1 |  |

|   |         |   |      |    |   |   |   |  |
|---|---------|---|------|----|---|---|---|--|
| 4 | Qiaokou | 2 | 2290 | 59 | 2 | 1 | 1 |  |
| 4 | Qiaokou | 2 | 2291 | 30 | 2 | 1 | 1 |  |
| 4 | Qiaokou | 2 | 2292 | 78 | 3 | 1 | 1 |  |
| 4 | Qiaokou | 2 | 2293 | 25 | 2 | 2 | 1 |  |
| 4 | Qiaokou | 2 | 2294 | 69 | 3 | 2 | 1 |  |
| 4 | Qiaokou | 2 | 2295 | 70 | 3 | 1 | 1 |  |
| 4 | Qiaokou | 2 | 2296 | 49 | 2 | 2 | 1 |  |
| 4 | Qiaokou | 2 | 2297 | 62 | 2 | 1 | 1 |  |
| 4 | Qiaokou | 2 | 2298 | 55 | 2 | 1 | 1 |  |
| 4 | Qiaokou | 2 | 2299 | 71 | 3 | 1 | 1 |  |
| 4 | Qiaokou | 2 | 2300 | 36 | 2 | 2 | 1 |  |
| 4 | Qiaokou | 2 | 2301 | 70 | 3 | 1 | 1 |  |
| 4 | Qiaokou | 2 | 2302 | 49 | 2 | 2 | 1 |  |
| 4 | Qiaokou | 2 | 2303 | 53 | 2 | 1 | 1 |  |
| 4 | Qiaokou | 2 | 2304 | 58 | 2 | 1 | 1 |  |
| 4 | Qiaokou | 2 | 2305 | 65 | 3 | 2 | 1 |  |
| 4 | Qiaokou | 2 | 2306 | 49 | 2 | 1 | 1 |  |
| 4 | Qiaokou | 2 | 2307 | 47 | 2 | 1 | 1 |  |
| 4 | Qiaokou | 2 | 2308 | 26 | 2 | 1 | 1 |  |
| 4 | Qiaokou | 2 | 2309 | 80 | 3 | 2 | 1 |  |
| 4 | Qiaokou | 2 | 2310 | 76 | 3 | 1 | 1 |  |
| 4 | Qiaokou | 2 | 2311 | 27 | 2 | 2 | 1 |  |
| 4 | Qiaokou | 2 | 2312 | 21 | 2 | 1 | 1 |  |
| 4 | Qiaokou | 2 | 2313 | 52 | 2 | 1 | 1 |  |
| 4 | Qiaokou | 2 | 2314 | 60 | 2 | 1 | 1 |  |
| 4 | Qiaokou | 2 | 2315 | 83 | 3 | 2 | 1 |  |
| 4 | Qiaokou | 2 | 2316 | 47 | 2 | 2 | 1 |  |
| 4 | Qiaokou | 2 | 2317 | 27 | 2 | 2 | 1 |  |
| 4 | Qiaokou | 2 | 2318 | 66 | 3 | 2 | 1 |  |
| 4 | Qiaokou | 2 | 2319 | 69 | 3 | 1 | 1 |  |
| 4 | Qiaokou | 2 | 2320 | 32 | 2 | 1 | 1 |  |
| 4 | Qiaokou | 2 | 2321 | 45 | 2 | 2 | 1 |  |
| 4 | Qiaokou | 2 | 2322 | 50 | 2 | 1 | 1 |  |
| 4 | Qiaokou | 2 | 2323 | 65 | 3 | 1 | 1 |  |
| 4 | Qiaokou | 2 | 2324 | 78 | 3 | 2 | 1 |  |
| 4 | Qiaokou | 2 | 2325 | 84 | 3 | 1 | 1 |  |
| 4 | Qiaokou | 2 | 2326 | 43 | 2 | 2 | 1 |  |
| 4 | Qiaokou | 2 | 2327 | 82 | 3 | 1 | 1 |  |
| 4 | Qiaokou | 2 | 2328 | 54 | 2 | 1 | 1 |  |
| 4 | Qiaokou | 2 | 2329 | 52 | 2 | 1 | 1 |  |
| 4 | Qiaokou | 2 | 2330 | 23 | 2 | 1 | 1 |  |
| 4 | Qiaokou | 2 | 2331 | 68 | 3 | 1 | 1 |  |
| 4 | Qiaokou | 2 | 2332 | 46 | 2 | 2 | 1 |  |
| 4 | Qiaokou | 2 | 2333 | 40 | 2 | 1 | 1 |  |
| 4 | Qiaokou | 2 | 2334 | 50 | 2 | 1 | 1 |  |
| 4 | Qiaokou | 2 | 2335 | 35 | 2 | 1 | 1 |  |
| 4 | Qiaokou | 2 | 2336 | 47 | 2 | 1 | 1 |  |
| 4 | Qiaokou | 2 | 2337 | 49 | 2 | 1 | 1 |  |
| 4 | Qiaokou | 2 | 2338 | 33 | 2 | 2 | 1 |  |
| 4 | Qiaokou | 2 | 2339 | 19 | 2 | 1 | 1 |  |
| 4 | Qiaokou | 2 | 2340 | 52 | 2 | 1 | 1 |  |
| 4 | Qiaokou | 2 | 2341 | 28 | 2 | 1 | 1 |  |
| 4 | Qiaokou | 2 | 2342 | 26 | 2 | 2 | 1 |  |
| 4 | Qiaokou | 2 | 2343 | 34 | 2 | 1 | 1 |  |

|   |         |   |      |    |   |   |   |  |
|---|---------|---|------|----|---|---|---|--|
| 4 | Qiaokou | 2 | 2344 | 34 | 2 | 1 | 1 |  |
| 4 | Qiaokou | 2 | 2345 | 48 | 2 | 1 | 1 |  |
| 4 | Qiaokou | 2 | 2346 | 18 | 2 | 1 | 1 |  |
| 4 | Qiaokou | 2 | 2347 | 26 | 2 | 1 | 1 |  |
| 4 | Qiaokou | 2 | 2348 | 48 | 2 | 2 | 1 |  |
| 4 | Qiaokou | 2 | 2349 | 79 | 3 | 1 | 1 |  |
| 4 | Qiaokou | 2 | 2350 | 49 | 2 | 1 | 1 |  |
| 4 | Qiaokou | 2 | 2351 | 86 | 3 | 1 | 1 |  |
| 4 | Qiaokou | 2 | 2352 | 62 | 2 | 1 | 1 |  |
| 4 | Qiaokou | 2 | 2353 | 39 | 2 | 2 | 1 |  |
| 4 | Qiaokou | 2 | 2354 | 60 | 2 | 1 | 1 |  |
| 4 | Qiaokou | 2 | 2355 | 76 | 3 | 2 | 1 |  |
| 4 | Qiaokou | 2 | 2356 | 35 | 2 | 2 | 1 |  |
| 4 | Qiaokou | 2 | 2357 | 58 | 2 | 1 | 1 |  |
| 4 | Qiaokou | 2 | 2358 | 50 | 2 | 2 | 1 |  |
| 4 | Qiaokou | 2 | 2359 | 42 | 2 | 1 | 1 |  |
| 4 | Qiaokou | 2 | 2360 | 64 | 2 | 1 | 1 |  |
| 4 | Qiaokou | 2 | 2361 | 68 | 3 | 1 | 1 |  |
| 4 | Qiaokou | 2 | 2362 | 21 | 2 | 2 | 1 |  |
| 4 | Qiaokou | 2 | 2363 | 29 | 2 | 1 | 1 |  |
| 4 | Qiaokou | 2 | 2364 | 55 | 2 | 1 | 1 |  |
| 4 | Qiaokou | 2 | 2365 | 26 | 2 | 2 | 1 |  |
| 4 | Qiaokou | 2 | 2366 | 56 | 2 | 1 | 1 |  |
| 4 | Qiaokou | 2 | 2367 | 55 | 2 | 2 | 1 |  |
| 4 | Qiaokou | 2 | 2368 | 77 | 3 | 1 | 1 |  |
| 4 | Qiaokou | 2 | 2369 | 59 | 2 | 1 | 1 |  |
| 4 | Qiaokou | 2 | 2370 | 27 | 2 | 2 | 1 |  |
| 4 | Qiaokou | 2 | 2371 | 77 | 3 | 1 | 1 |  |
| 4 | Qiaokou | 2 | 2372 | 61 | 2 | 1 | 1 |  |
| 4 | Qiaokou | 2 | 2373 | 19 | 2 | 2 | 1 |  |
| 4 | Qiaokou | 2 | 2374 | 53 | 2 | 1 | 1 |  |
| 4 | Qiaokou | 2 | 2375 | 28 | 2 | 1 | 1 |  |
| 4 | Qiaokou | 2 | 2376 | 27 | 2 | 1 | 1 |  |
| 4 | Qiaokou | 2 | 2377 | 24 | 2 | 1 | 1 |  |
| 4 | Qiaokou | 2 | 2378 | 36 | 2 | 2 | 1 |  |
| 4 | Qiaokou | 2 | 2379 | 27 | 2 | 2 | 1 |  |
| 4 | Qiaokou | 2 | 2380 | 71 | 3 | 2 | 1 |  |
| 4 | Qiaokou | 2 | 2381 | 57 | 2 | 1 | 1 |  |
| 4 | Qiaokou | 2 | 2382 | 31 | 2 | 2 | 1 |  |
| 4 | Qiaokou | 2 | 2383 | 66 | 3 | 1 | 1 |  |
| 4 | Qiaokou | 2 | 2384 | 42 | 2 | 1 | 1 |  |
| 4 | Qiaokou | 2 | 2385 | 36 | 2 | 1 | 1 |  |
| 4 | Qiaokou | 2 | 2386 | 22 | 2 | 2 | 1 |  |
| 4 | Qiaokou | 2 | 2387 | 33 | 2 | 1 | 1 |  |
| 4 | Qiaokou | 2 | 2388 | 16 | 2 | 1 | 1 |  |
| 4 | Qiaokou | 2 | 2389 | 35 | 2 | 1 | 1 |  |
| 4 | Qiaokou | 2 | 2390 | 58 | 2 | 1 | 1 |  |
| 4 | Qiaokou | 2 | 2391 | 25 | 2 | 1 | 1 |  |
| 4 | Qiaokou | 2 | 2392 | 78 | 3 | 1 | 1 |  |
| 4 | Qiaokou | 2 | 2393 | 18 | 2 | 1 | 1 |  |
| 4 | Qiaokou | 2 | 2394 | 22 | 2 | 1 | 1 |  |
| 4 | Qiaokou | 2 | 2395 | 80 | 3 | 1 | 1 |  |
| 4 | Qiaokou | 2 | 2396 | 54 | 2 | 1 | 1 |  |
| 4 | Qiaokou | 2 | 2397 | 84 | 3 | 2 | 1 |  |

|   |         |   |      |    |   |   |   |  |
|---|---------|---|------|----|---|---|---|--|
| 4 | Qiaokou | 2 | 2398 | 55 | 2 | 2 | 1 |  |
| 4 | Qiaokou | 2 | 2399 | 29 | 2 | 2 | 1 |  |
| 4 | Qiaokou | 2 | 2400 | 27 | 2 | 2 | 1 |  |
| 4 | Qiaokou | 2 | 2401 | 48 | 2 | 1 | 1 |  |
| 4 | Qiaokou | 2 | 2402 | 22 | 2 | 1 | 1 |  |
| 4 | Qiaokou | 2 | 2403 | 61 | 2 | 1 | 1 |  |
| 4 | Qiaokou | 2 | 2404 | 62 | 2 | 2 | 1 |  |
| 4 | Qiaokou | 2 | 2405 | 48 | 2 | 1 | 1 |  |
| 4 | Qiaokou | 2 | 2406 | 46 | 2 | 2 | 1 |  |
| 4 | Qiaokou | 2 | 2407 | 58 | 2 | 1 | 1 |  |
| 4 | Qiaokou | 2 | 2408 | 58 | 2 | 2 | 1 |  |
| 4 | Qiaokou | 2 | 2409 | 50 | 2 | 1 | 1 |  |
| 4 | Qiaokou | 2 | 2410 | 54 | 2 | 1 | 1 |  |
| 4 | Qiaokou | 2 | 2411 | 29 | 2 | 2 | 1 |  |
| 4 | Qiaokou | 2 | 2412 | 68 | 3 | 1 | 1 |  |
| 4 | Qiaokou | 2 | 2413 | 50 | 2 | 1 | 1 |  |
| 4 | Qiaokou | 2 | 2414 | 41 | 2 | 2 | 1 |  |
| 4 | Qiaokou | 2 | 2415 | 37 | 2 | 1 | 1 |  |
| 4 | Qiaokou | 2 | 2416 | 76 | 3 | 2 | 1 |  |
| 4 | Qiaokou | 2 | 2417 | 29 | 2 | 2 | 1 |  |
| 4 | Qiaokou | 2 | 2418 | 18 | 2 | 1 | 1 |  |
| 4 | Qiaokou | 2 | 2419 | 53 | 2 | 1 | 1 |  |
| 4 | Qiaokou | 2 | 2420 | 61 | 2 | 2 | 1 |  |
| 4 | Qiaokou | 2 | 2421 | 52 | 2 | 2 | 1 |  |
| 4 | Qiaokou | 2 | 2422 | 20 | 2 | 2 | 1 |  |
| 4 | Qiaokou | 2 | 2423 | 84 | 3 | 1 | 1 |  |
| 4 | Qiaokou | 2 | 2424 | 37 | 2 | 2 | 1 |  |
| 4 | Qiaokou | 2 | 2425 | 55 | 2 | 1 | 1 |  |
| 4 | Qiaokou | 2 | 2426 | 21 | 2 | 1 | 1 |  |
| 4 | Qiaokou | 2 | 2427 | 61 | 2 | 1 | 1 |  |
| 4 | Qiaokou | 2 | 2428 | 27 | 2 | 2 | 1 |  |
| 4 | Qiaokou | 2 | 2429 | 67 | 3 | 1 | 1 |  |
| 4 | Qiaokou | 2 | 2430 | 21 | 2 | 1 | 1 |  |
| 4 | Qiaokou | 2 | 2431 | 30 | 2 | 2 | 1 |  |
| 4 | Qiaokou | 2 | 2432 | 46 | 2 | 1 | 1 |  |
| 4 | Qiaokou | 2 | 2433 | 24 | 2 | 2 | 1 |  |
| 4 | Qiaokou | 2 | 2434 | 37 | 2 | 2 | 1 |  |
| 4 | Qiaokou | 2 | 2435 | 65 | 3 | 1 | 1 |  |
| 4 | Qiaokou | 2 | 2436 | 42 | 2 | 1 | 1 |  |
| 4 | Qiaokou | 2 | 2437 | 0  | 1 | 1 | 1 |  |
| 4 | Qiaokou | 2 | 2438 | 24 | 2 | 2 | 1 |  |
| 4 | Qiaokou | 2 | 2439 | 21 | 2 | 2 | 1 |  |
| 4 | Qiaokou | 2 | 2440 | 47 | 2 | 2 | 1 |  |
| 4 | Qiaokou | 2 | 2441 | 75 | 3 | 1 | 1 |  |
| 4 | Qiaokou | 2 | 2442 | 53 | 2 | 1 | 1 |  |
| 4 | Qiaokou | 2 | 2443 | 39 | 2 | 1 | 1 |  |
| 4 | Qiaokou | 2 | 2444 | 18 | 2 | 2 | 1 |  |
| 4 | Qiaokou | 2 | 2445 | 77 | 3 | 2 | 1 |  |
| 4 | Qiaokou | 2 | 2446 | 82 | 3 | 1 | 1 |  |
| 4 | Qiaokou | 2 | 2447 | 41 | 2 | 1 | 1 |  |
| 4 | Qiaokou | 2 | 2448 | 55 | 2 | 2 | 1 |  |
| 4 | Qiaokou | 2 | 2449 | 18 | 2 | 2 | 1 |  |
| 4 | Qiaokou | 2 | 2450 | 30 | 2 | 1 | 1 |  |
| 4 | Qiaokou | 2 | 2451 | 55 | 2 | 1 | 1 |  |

|   |         |   |      |    |   |   |   |  |
|---|---------|---|------|----|---|---|---|--|
| 4 | Qiaokou | 2 | 2452 | 34 | 2 | 1 | 1 |  |
| 4 | Qiaokou | 2 | 2453 | 49 | 2 | 2 | 1 |  |
| 4 | Qiaokou | 2 | 2454 | 22 | 2 | 1 | 1 |  |
| 4 | Qiaokou | 2 | 2455 | 28 | 2 | 2 | 1 |  |
| 4 | Qiaokou | 2 | 2456 | 83 | 3 | 1 | 1 |  |
| 4 | Qiaokou | 2 | 2457 | 64 | 2 | 1 | 1 |  |
| 4 | Qiaokou | 2 | 2458 | 15 | 2 | 2 | 1 |  |
| 4 | Qiaokou | 2 | 2459 | 26 | 2 | 2 | 1 |  |
| 4 | Qiaokou | 2 | 2460 | 19 | 2 | 1 | 1 |  |
| 4 | Qiaokou | 2 | 2461 | 43 | 2 | 1 | 1 |  |
| 4 | Qiaokou | 2 | 2462 | 76 | 3 | 1 | 1 |  |
| 4 | Qiaokou | 2 | 2463 | 60 | 2 | 1 | 1 |  |
| 4 | Qiaokou | 2 | 2464 | 22 | 2 | 1 | 1 |  |
| 4 | Qiaokou | 2 | 2465 | 58 | 2 | 1 | 1 |  |
| 4 | Qiaokou | 2 | 2466 | 63 | 2 | 1 | 1 |  |
| 4 | Qiaokou | 2 | 2467 | 58 | 2 | 1 | 1 |  |
| 4 | Qiaokou | 2 | 2468 | 92 | 3 | 1 | 1 |  |
| 4 | Qiaokou | 2 | 2469 | 76 | 3 | 1 | 1 |  |
| 4 | Qiaokou | 2 | 2470 | 55 | 2 | 2 | 1 |  |
| 4 | Qiaokou | 2 | 2471 | 27 | 2 | 1 | 1 |  |
| 4 | Qiaokou | 2 | 2472 | 53 | 2 | 2 | 1 |  |
| 4 | Qiaokou | 2 | 2473 | 38 | 2 | 2 | 1 |  |
| 4 | Qiaokou | 2 | 2474 | 35 | 2 | 1 | 1 |  |
| 4 | Qiaokou | 2 | 2475 | 45 | 2 | 1 | 1 |  |
| 4 | Qiaokou | 2 | 2476 | 45 | 2 | 2 | 1 |  |
| 4 | Qiaokou | 2 | 2477 | 20 | 2 | 1 | 1 |  |
| 4 | Qiaokou | 2 | 2478 | 49 | 2 | 1 | 1 |  |
| 4 | Qiaokou | 2 | 2479 | 71 | 3 | 2 | 1 |  |
| 4 | Qiaokou | 2 | 2480 | 53 | 2 | 1 | 1 |  |
| 4 | Qiaokou | 2 | 2481 | 58 | 2 | 1 | 1 |  |
| 4 | Qiaokou | 2 | 2482 | 76 | 3 | 1 | 1 |  |
| 4 | Qiaokou | 2 | 2483 | 57 | 2 | 1 | 1 |  |
| 4 | Qiaokou | 2 | 2484 | 57 | 2 | 1 | 1 |  |
| 4 | Qiaokou | 2 | 2485 | 53 | 2 | 1 | 1 |  |
| 4 | Qiaokou | 2 | 2486 | 34 | 2 | 2 | 1 |  |
| 4 | Qiaokou | 2 | 2487 | 67 | 3 | 2 | 1 |  |
| 4 | Qiaokou | 2 | 2488 | 49 | 2 | 2 | 1 |  |
| 4 | Qiaokou | 2 | 2489 | 63 | 2 | 1 | 1 |  |
| 4 | Qiaokou | 2 | 2490 | 42 | 2 | 1 | 1 |  |
| 4 | Qiaokou | 2 | 2491 | 65 | 3 | 1 | 1 |  |
| 4 | Qiaokou | 2 | 2492 | 27 | 2 | 2 | 1 |  |
| 4 | Qiaokou | 2 | 2493 | 54 | 2 | 1 | 1 |  |
| 4 | Qiaokou | 2 | 2494 | 70 | 3 | 1 | 1 |  |
| 4 | Qiaokou | 2 | 2495 | 17 | 2 | 1 | 1 |  |
| 4 | Qiaokou | 2 | 2496 | 79 | 3 | 2 | 1 |  |
| 4 | Qiaokou | 2 | 2497 | 75 | 3 | 2 | 1 |  |
| 4 | Qiaokou | 2 | 2498 | 90 | 3 | 1 | 1 |  |
| 4 | Qiaokou | 2 | 2499 | 62 | 2 | 2 | 1 |  |
| 4 | Qiaokou | 2 | 2500 | 60 | 2 | 1 | 1 |  |
| 4 | Qiaokou | 2 | 2501 | 22 | 2 | 1 | 1 |  |
| 4 | Qiaokou | 2 | 2502 | 67 | 3 | 1 | 1 |  |
| 4 | Qiaokou | 2 | 2503 | 51 | 2 | 1 | 1 |  |
| 4 | Qiaokou | 2 | 2504 | 55 | 2 | 2 | 1 |  |
| 4 | Qiaokou | 2 | 2505 | 69 | 3 | 2 | 1 |  |

|   |         |   |      |    |   |   |   |  |
|---|---------|---|------|----|---|---|---|--|
| 4 | Qiaokou | 2 | 2506 | 46 | 2 | 2 | 1 |  |
| 4 | Qiaokou | 2 | 2507 | 59 | 2 | 2 | 1 |  |
| 4 | Qiaokou | 2 | 2508 | 60 | 2 | 1 | 1 |  |
| 4 | Qiaokou | 2 | 2509 | 29 | 2 | 1 | 1 |  |
| 4 | Qiaokou | 2 | 2510 | 84 | 3 | 1 | 1 |  |
| 4 | Qiaokou | 2 | 2511 | 65 | 3 | 1 | 1 |  |
| 4 | Qiaokou | 2 | 2512 | 60 | 2 | 1 | 1 |  |
| 4 | Qiaokou | 2 | 2513 | 61 | 2 | 1 | 1 |  |
| 4 | Qiaokou | 2 | 2514 | 43 | 2 | 1 | 1 |  |
| 4 | Qiaokou | 2 | 2515 | 28 | 2 | 1 | 1 |  |
| 4 | Qiaokou | 2 | 2516 | 40 | 2 | 1 | 1 |  |
| 4 | Qiaokou | 2 | 2517 | 25 | 2 | 1 | 1 |  |
| 4 | Qiaokou | 2 | 2518 | 54 | 2 | 1 | 1 |  |
| 4 | Qiaokou | 2 | 2519 | 37 | 2 | 1 | 1 |  |
| 4 | Qiaokou | 2 | 2520 | 69 | 3 | 1 | 1 |  |
| 4 | Qiaokou | 2 | 2521 | 50 | 2 | 1 | 1 |  |
| 4 | Qiaokou | 2 | 2522 | 67 | 3 | 1 | 1 |  |
| 4 | Qiaokou | 2 | 2523 | 56 | 2 | 1 | 1 |  |
| 4 | Qiaokou | 2 | 2524 | 31 | 2 | 2 | 1 |  |
| 4 | Qiaokou | 2 | 2525 | 41 | 2 | 1 | 1 |  |
| 4 | Qiaokou | 2 | 2526 | 34 | 2 | 1 | 1 |  |
| 4 | Qiaokou | 2 | 2527 | 29 | 2 | 1 | 1 |  |
| 4 | Qiaokou | 2 | 2528 | 53 | 2 | 1 | 1 |  |
| 4 | Qiaokou | 2 | 2529 | 48 | 2 | 1 | 1 |  |
| 4 | Qiaokou | 2 | 2530 | 78 | 3 | 1 | 1 |  |
| 4 | Qiaokou | 2 | 2531 | 52 | 2 | 2 | 1 |  |
| 4 | Qiaokou | 2 | 2532 | 35 | 2 | 2 | 1 |  |
| 4 | Qiaokou | 2 | 2533 | 74 | 3 | 2 | 1 |  |
| 4 | Qiaokou | 2 | 2534 | 53 | 2 | 1 | 1 |  |
| 4 | Qiaokou | 2 | 2535 | 24 | 2 | 1 | 1 |  |
| 4 | Qiaokou | 2 | 2536 | 62 | 2 | 1 | 1 |  |
| 4 | Qiaokou | 2 | 2537 | 6  | 1 | 2 | 1 |  |
| 4 | Qiaokou | 2 | 2538 | 52 | 2 | 1 | 1 |  |
| 4 | Qiaokou | 2 | 2539 | 31 | 2 | 2 | 1 |  |
| 4 | Qiaokou | 2 | 2540 | 26 | 2 | 2 | 1 |  |
| 4 | Qiaokou | 2 | 2541 | 20 | 2 | 1 | 1 |  |
| 4 | Qiaokou | 2 | 2542 | 74 | 3 | 1 | 1 |  |
| 4 | Qiaokou | 2 | 2543 | 57 | 2 | 1 | 1 |  |
| 4 | Qiaokou | 2 | 2544 | 35 | 2 | 2 | 1 |  |
| 4 | Qiaokou | 2 | 2545 | 45 | 2 | 2 | 1 |  |
| 4 | Qiaokou | 2 | 2546 | 21 | 2 | 2 | 1 |  |
| 4 | Qiaokou | 2 | 2547 | 23 | 2 | 2 | 1 |  |
| 4 | Qiaokou | 2 | 2548 | 61 | 2 | 1 | 1 |  |
| 4 | Qiaokou | 2 | 2549 | 55 | 2 | 1 | 1 |  |
| 4 | Qiaokou | 2 | 2550 | 46 | 2 | 2 | 1 |  |
| 4 | Qiaokou | 2 | 2551 | 31 | 2 | 1 | 1 |  |
| 4 | Qiaokou | 2 | 2552 | 65 | 3 | 2 | 1 |  |
| 4 | Qiaokou | 2 | 2553 | 21 | 2 | 2 | 1 |  |
| 4 | Qiaokou | 2 | 2554 | 59 | 2 | 1 | 1 |  |
| 4 | Qiaokou | 2 | 2555 | 47 | 2 | 1 | 1 |  |
| 4 | Qiaokou | 2 | 2556 | 71 | 3 | 1 | 1 |  |
| 4 | Qiaokou | 2 | 2557 | 42 | 2 | 2 | 1 |  |
| 4 | Qiaokou | 2 | 2558 | 26 | 2 | 1 | 1 |  |
| 4 | Qiaokou | 2 | 2559 | 26 | 2 | 1 | 1 |  |



|   |         |   |      |    |   |   |   |  |
|---|---------|---|------|----|---|---|---|--|
| 4 | Qiaokou | 2 | 2560 | 44 | 2 | 1 | 1 |  |
| 4 | Qiaokou | 2 | 2561 | 45 | 2 | 2 | 1 |  |
| 4 | Qiaokou | 2 | 2562 | 31 | 2 | 2 | 1 |  |
| 4 | Qiaokou | 2 | 2563 | 25 | 2 | 2 | 1 |  |
| 4 | Qiaokou | 2 | 2564 | 25 | 2 | 1 | 1 |  |
| 4 | Qiaokou | 2 | 2565 | 39 | 2 | 1 | 1 |  |
| 4 | Qiaokou | 2 | 2566 | 47 | 2 | 1 | 1 |  |
| 4 | Qiaokou | 2 | 2567 | 46 | 2 | 1 | 1 |  |
| 4 | Qiaokou | 2 | 2568 | 22 | 2 | 2 | 1 |  |
| 4 | Qiaokou | 2 | 2569 | 49 | 2 | 1 | 1 |  |
| 4 | Qiaokou | 2 | 2570 | 26 | 2 | 1 | 1 |  |
| 4 | Qiaokou | 2 | 2571 | 43 | 2 | 2 | 1 |  |
| 4 | Qiaokou | 2 | 2572 | 61 | 2 | 1 | 1 |  |
| 4 | Qiaokou | 2 | 2573 | 71 | 3 | 1 | 1 |  |
| 4 | Qiaokou | 2 | 2574 | 57 | 2 | 1 | 1 |  |
| 4 | Qiaokou | 2 | 2575 | 18 | 2 | 1 | 1 |  |
| 4 | Qiaokou | 2 | 2576 | 26 | 2 | 2 | 1 |  |
| 4 | Qiaokou | 2 | 2577 | 22 | 2 | 1 | 1 |  |
| 4 | Qiaokou | 2 | 2578 | 42 | 2 | 1 | 2 |  |
| 4 | Qiaokou | 2 | 2579 | 51 | 2 | 1 | 2 |  |
| 4 | Qiaokou | 2 | 2580 | 59 | 2 | 1 | 2 |  |
| 4 | Qiaokou | 2 | 2581 | 37 | 2 | 1 | 2 |  |
| 4 | Qiaokou | 2 | 2582 | 41 | 2 | 1 | 2 |  |
| 4 | Qiaokou | 2 | 2583 | 29 | 2 | 2 | 2 |  |
| 4 | Qiaokou | 2 | 2584 | 62 | 2 | 1 | 2 |  |
| 4 | Qiaokou | 2 | 2585 | 21 | 2 | 1 | 2 |  |
| 4 | Qiaokou | 2 | 2586 | 51 | 2 | 1 | 2 |  |
| 4 | Qiaokou | 2 | 2587 | 63 | 2 | 1 | 2 |  |
| 4 | Qiaokou | 2 | 2588 | 22 | 2 | 1 | 2 |  |
| 4 | Qiaokou | 2 | 2589 | 51 | 2 | 1 | 2 |  |
| 4 | Qiaokou | 2 | 2590 | 75 | 3 | 1 | 2 |  |
| 4 | Qiaokou | 2 | 2591 | 59 | 2 | 1 | 2 |  |
| 4 | Qiaokou | 2 | 2592 | 60 | 2 | 1 | 2 |  |
| 4 | Qiaokou | 2 | 2593 | 50 | 2 | 2 | 2 |  |
| 4 | Qiaokou | 2 | 2594 | 56 | 2 | 1 | 2 |  |
| 4 | Qiaokou | 2 | 2595 | 60 | 2 | 1 | 2 |  |
| 4 | Qiaokou | 2 | 2596 | 21 | 2 | 2 | 2 |  |
| 4 | Qiaokou | 2 | 2597 | 45 | 2 | 2 | 2 |  |
| 4 | Qiaokou | 2 | 2598 | 25 | 2 | 1 | 2 |  |
| 4 | Qiaokou | 2 | 2599 | 24 | 2 | 1 | 2 |  |
| 4 | Qiaokou | 2 | 2600 | 50 | 2 | 1 | 2 |  |
| 4 | Qiaokou | 2 | 2601 | 33 | 2 | 2 | 2 |  |
| 4 | Qiaokou | 2 | 2602 | 47 | 2 | 2 | 2 |  |
| 4 | Qiaokou | 2 | 2603 | 23 | 2 | 1 | 2 |  |
| 4 | Qiaokou | 2 | 2604 | 91 | 3 | 1 | 2 |  |
| 4 | Qiaokou | 2 | 2605 | 23 | 2 | 1 | 2 |  |
| 4 | Qiaokou | 2 | 2606 | 30 | 2 | 1 | 2 |  |
| 4 | Qiaokou | 2 | 2607 | 38 | 2 | 2 | 2 |  |
| 4 | Qiaokou | 2 | 2608 | 46 | 2 | 1 | 2 |  |
| 4 | Qiaokou | 2 | 2609 | 22 | 2 | 2 | 2 |  |
| 4 | Qiaokou | 2 | 2610 | 82 | 3 | 1 | 2 |  |
| 4 | Qiaokou | 2 | 2611 | 52 | 2 | 2 | 2 |  |
| 4 | Qiaokou | 2 | 2612 | 48 | 2 | 2 | 2 |  |
| 4 | Qiaokou | 2 | 2613 | 52 | 2 | 1 | 2 |  |

|   |         |   |      |    |   |   |   |  |
|---|---------|---|------|----|---|---|---|--|
| 4 | Qiaokou | 2 | 2614 | 50 | 2 | 1 | 2 |  |
| 4 | Qiaokou | 2 | 2615 | 56 | 2 | 1 | 2 |  |
| 4 | Qiaokou | 2 | 2616 | 53 | 2 | 1 | 2 |  |
| 4 | Qiaokou | 2 | 2617 | 26 | 2 | 1 | 2 |  |
| 4 | Qiaokou | 2 | 2618 | 21 | 2 | 1 | 2 |  |
| 4 | Qiaokou | 2 | 2619 | 85 | 3 | 1 | 2 |  |
| 4 | Qiaokou | 2 | 2620 | 83 | 3 | 2 | 2 |  |
| 4 | Qiaokou | 2 | 2621 | 68 | 3 | 1 | 2 |  |
| 4 | Qiaokou | 2 | 2622 | 46 | 2 | 1 | 2 |  |
| 4 | Qiaokou | 2 | 2623 | 36 | 2 | 1 | 2 |  |
| 4 | Qiaokou | 2 | 2624 | 38 | 2 | 1 | 2 |  |
| 4 | Qiaokou | 2 | 2625 | 20 | 2 | 1 | 2 |  |
| 4 | Qiaokou | 2 | 2626 | 53 | 2 | 2 | 2 |  |
| 4 | Qiaokou | 2 | 2627 | 61 | 2 | 2 | 2 |  |
| 4 | Qiaokou | 2 | 2628 | 22 | 2 | 1 | 2 |  |
| 4 | Qiaokou | 2 | 2629 | 18 | 2 | 2 | 2 |  |
| 4 | Qiaokou | 2 | 2630 | 71 | 3 | 1 | 2 |  |
| 4 | Qiaokou | 2 | 2631 | 18 | 2 | 2 | 2 |  |
| 4 | Qiaokou | 2 | 2632 | 19 | 2 | 2 | 2 |  |
| 4 | Qiaokou | 2 | 2633 | 49 | 2 | 2 | 2 |  |
| 4 | Qiaokou | 2 | 2634 | 48 | 2 | 1 | 2 |  |
| 4 | Qiaokou | 2 | 2635 | 62 | 2 | 1 | 2 |  |
| 4 | Qiaokou | 2 | 2636 | 35 | 2 | 1 | 2 |  |
| 4 | Qiaokou | 2 | 2637 | 19 | 2 | 1 | 2 |  |
| 4 | Qiaokou | 2 | 2638 | 45 | 2 | 2 | 2 |  |
| 4 | Qiaokou | 2 | 2639 | 42 | 2 | 2 | 2 |  |
| 4 | Qiaokou | 2 | 2640 | 30 | 2 | 1 | 2 |  |
| 4 | Qiaokou | 2 | 2641 | 38 | 2 | 2 | 2 |  |
| 4 | Qiaokou | 2 | 2642 | 60 | 2 | 1 | 2 |  |
| 4 | Qiaokou | 2 | 2643 | 18 | 2 | 1 | 2 |  |
| 4 | Qiaokou | 2 | 2644 | 28 | 2 | 1 | 2 |  |
| 4 | Qiaokou | 2 | 2645 | 19 | 2 | 1 | 2 |  |
| 4 | Qiaokou | 2 | 2646 | 31 | 2 | 1 | 2 |  |
| 4 | Qiaokou | 2 | 2647 | 52 | 2 | 1 | 2 |  |
| 4 | Qiaokou | 2 | 2648 | 60 | 2 | 1 | 2 |  |
| 4 | Qiaokou | 2 | 2649 | 16 | 2 | 2 | 2 |  |
| 4 | Qiaokou | 2 | 2650 | 43 | 2 | 2 | 2 |  |
| 4 | Qiaokou | 2 | 2651 | 44 | 2 | 1 | 2 |  |
| 4 | Qiaokou | 2 | 2652 | 40 | 2 | 1 | 2 |  |
| 4 | Qiaokou | 2 | 2653 | 52 | 2 | 1 | 2 |  |
| 4 | Qiaokou | 2 | 2654 | 51 | 2 | 1 | 2 |  |
| 4 | Qiaokou | 2 | 2655 | 40 | 2 | 1 | 2 |  |
| 4 | Qiaokou | 2 | 2656 | 46 | 2 | 1 | 2 |  |
| 4 | Qiaokou | 2 | 2657 | 62 | 2 | 2 | 2 |  |
| 4 | Qiaokou | 2 | 2658 | 25 | 2 | 2 | 2 |  |
| 4 | Qiaokou | 2 | 2659 | 47 | 2 | 1 | 2 |  |
| 4 | Qiaokou | 2 | 2660 | 59 | 2 | 1 | 2 |  |
| 4 | Qiaokou | 2 | 2661 | 78 | 3 | 1 | 2 |  |
| 4 | Qiaokou | 2 | 2662 | 85 | 3 | 2 | 2 |  |
| 4 | Qiaokou | 2 | 2663 | 56 | 2 | 1 | 2 |  |
| 4 | Qiaokou | 2 | 2664 | 63 | 2 | 1 | 2 |  |
| 4 | Qiaokou | 2 | 2665 | 56 | 2 | 1 | 2 |  |
| 4 | Qiaokou | 2 | 2666 | 30 | 2 | 2 | 2 |  |
| 4 | Qiaokou | 2 | 2667 | 65 | 3 | 1 | 2 |  |

|   |         |   |      |    |   |   |   |  |
|---|---------|---|------|----|---|---|---|--|
| 4 | Qiaokou | 2 | 2668 | 56 | 2 | 2 | 2 |  |
| 4 | Qiaokou | 2 | 2669 | 56 | 2 | 1 | 2 |  |
| 4 | Qiaokou | 2 | 2670 | 25 | 2 | 2 | 2 |  |
| 4 | Qiaokou | 2 | 2671 | 41 | 2 | 1 | 2 |  |
| 4 | Qiaokou | 2 | 2672 | 46 | 2 | 2 | 2 |  |
| 4 | Qiaokou | 2 | 2673 | 51 | 2 | 2 | 2 |  |
| 4 | Qiaokou | 2 | 2674 | 62 | 2 | 1 | 2 |  |
| 4 | Qiaokou | 2 | 2675 | 33 | 2 | 2 | 2 |  |
| 4 | Qiaokou | 2 | 2676 | 28 | 2 | 1 | 2 |  |
| 4 | Qiaokou | 2 | 2677 | 62 | 2 | 1 | 2 |  |
| 4 | Qiaokou | 2 | 2678 | 22 | 2 | 1 | 2 |  |
| 4 | Qiaokou | 2 | 2679 | 23 | 2 | 1 | 2 |  |
| 4 | Qiaokou | 2 | 2680 | 55 | 2 | 1 | 2 |  |
| 4 | Qiaokou | 2 | 2681 | 58 | 2 | 2 | 2 |  |
| 4 | Qiaokou | 2 | 2682 | 23 | 2 | 2 | 2 |  |
| 4 | Qiaokou | 2 | 2683 | 28 | 2 | 2 | 2 |  |
| 4 | Qiaokou | 2 | 2684 | 68 | 3 | 1 | 2 |  |
| 4 | Qiaokou | 2 | 2685 | 43 | 2 | 2 | 2 |  |
| 4 | Qiaokou | 2 | 2686 | 18 | 2 | 2 | 2 |  |
| 4 | Qiaokou | 2 | 2687 | 54 | 2 | 1 | 2 |  |
| 4 | Qiaokou | 2 | 2688 | 81 | 3 | 1 | 2 |  |
| 4 | Qiaokou | 2 | 2689 | 24 | 2 | 1 | 2 |  |
| 4 | Qiaokou | 2 | 2690 | 81 | 3 | 1 | 2 |  |
| 4 | Qiaokou | 2 | 2691 | 21 | 2 | 1 | 2 |  |
| 4 | Qiaokou | 2 | 2692 | 56 | 2 | 1 | 2 |  |
| 4 | Qiaokou | 2 | 2693 | 28 | 2 | 1 | 2 |  |
| 4 | Qiaokou | 2 | 2694 | 16 | 2 | 1 | 2 |  |
| 4 | Qiaokou | 2 | 2695 | 21 | 2 | 1 | 2 |  |
| 4 | Qiaokou | 2 | 2696 | 53 | 2 | 1 | 2 |  |
| 4 | Qiaokou | 2 | 2697 | 22 | 2 | 1 | 2 |  |
| 4 | Qiaokou | 2 | 2698 | 44 | 2 | 1 | 2 |  |
| 4 | Qiaokou | 2 | 2699 | 26 | 2 | 2 | 2 |  |
| 4 | Qiaokou | 2 | 2700 | 52 | 2 | 2 | 2 |  |
| 4 | Qiaokou | 2 | 2701 | 57 | 2 | 1 | 2 |  |
| 4 | Qiaokou | 2 | 2702 | 27 | 2 | 2 | 2 |  |
| 4 | Qiaokou | 2 | 2703 | 28 | 2 | 1 | 2 |  |
| 4 | Qiaokou | 2 | 2704 | 78 | 3 | 1 | 2 |  |
| 4 | Qiaokou | 2 | 2705 | 47 | 2 | 2 | 2 |  |
| 4 | Qiaokou | 2 | 2706 | 56 | 2 | 1 | 2 |  |
| 4 | Qiaokou | 2 | 2707 | 18 | 2 | 1 | 2 |  |
| 4 | Qiaokou | 2 | 2708 | 64 | 2 | 1 | 2 |  |
| 4 | Qiaokou | 2 | 2709 | 51 | 2 | 2 | 2 |  |
| 4 | Qiaokou | 2 | 2710 | 30 | 2 | 1 | 2 |  |
| 4 | Qiaokou | 2 | 2711 | 63 | 2 | 2 | 2 |  |
| 4 | Qiaokou | 2 | 2712 | 80 | 3 | 1 | 2 |  |
| 4 | Qiaokou | 2 | 2713 | 82 | 3 | 1 | 2 |  |
| 4 | Qiaokou | 2 | 2714 | 19 | 2 | 1 | 2 |  |
| 4 | Qiaokou | 2 | 2715 | 18 | 2 | 1 | 2 |  |
| 4 | Qiaokou | 2 | 2716 | 75 | 3 | 2 | 2 |  |
| 4 | Qiaokou | 2 | 2717 | 56 | 2 | 1 | 2 |  |
| 4 | Qiaokou | 2 | 2718 | 46 | 2 | 1 | 2 |  |
| 4 | Qiaokou | 2 | 2719 | 64 | 2 | 1 | 2 |  |
| 4 | Qiaokou | 2 | 2720 | 21 | 2 | 1 | 2 |  |
| 4 | Qiaokou | 2 | 2721 | 84 | 3 | 1 | 2 |  |

|   |         |   |      |    |   |   |   |  |
|---|---------|---|------|----|---|---|---|--|
| 4 | Qiaokou | 2 | 2722 | 29 | 2 | 1 | 2 |  |
| 4 | Qiaokou | 2 | 2723 | 82 | 3 | 1 | 2 |  |
| 4 | Qiaokou | 2 | 2724 | 60 | 2 | 1 | 2 |  |
| 4 | Qiaokou | 2 | 2725 | 52 | 2 | 2 | 2 |  |
| 4 | Qiaokou | 2 | 2726 | 19 | 2 | 1 | 2 |  |
| 4 | Qiaokou | 2 | 2727 | 65 | 3 | 2 | 2 |  |
| 4 | Qiaokou | 2 | 2728 | 60 | 2 | 1 | 2 |  |
| 4 | Qiaokou | 2 | 2729 | 28 | 2 | 2 | 2 |  |
| 4 | Qiaokou | 2 | 2730 | 26 | 2 | 1 | 2 |  |
| 4 | Qiaokou | 2 | 2731 | 42 | 2 | 2 | 2 |  |
| 4 | Qiaokou | 2 | 2732 | 53 | 2 | 1 | 2 |  |
| 4 | Qiaokou | 2 | 2733 | 59 | 2 | 2 | 2 |  |
| 4 | Qiaokou | 2 | 2734 | 22 | 2 | 2 | 2 |  |
| 4 | Qiaokou | 2 | 2735 | 59 | 2 | 1 | 2 |  |
| 4 | Qiaokou | 2 | 2736 | 26 | 2 | 1 | 2 |  |
| 4 | Qiaokou | 2 | 2737 | 51 | 2 | 1 | 2 |  |
| 4 | Qiaokou | 2 | 2738 | 48 | 2 | 1 | 2 |  |
| 4 | Qiaokou | 2 | 2739 | 66 | 3 | 2 | 2 |  |
| 4 | Qiaokou | 2 | 2740 | 59 | 2 | 2 | 2 |  |
| 4 | Qiaokou | 2 | 2741 | 19 | 2 | 1 | 2 |  |
| 4 | Qiaokou | 2 | 2742 | 54 | 2 | 1 | 2 |  |
| 4 | Qiaokou | 2 | 2743 | 44 | 2 | 2 | 2 |  |
| 4 | Qiaokou | 2 | 2744 | 20 | 2 | 2 | 2 |  |
| 4 | Qiaokou | 2 | 2745 | 26 | 2 | 1 | 2 |  |
| 4 | Qiaokou | 2 | 2746 | 81 | 3 | 1 | 2 |  |
| 4 | Qiaokou | 2 | 2747 | 55 | 2 | 1 | 2 |  |
| 4 | Qiaokou | 2 | 2748 | 58 | 2 | 1 | 2 |  |
| 4 | Qiaokou | 2 | 2749 | 79 | 3 | 1 | 2 |  |
| 4 | Qiaokou | 2 | 2750 | 33 | 2 | 1 | 2 |  |
| 4 | Qiaokou | 2 | 2751 | 49 | 2 | 1 | 2 |  |
| 4 | Qiaokou | 2 | 2752 | 60 | 2 | 1 | 2 |  |
| 4 | Qiaokou | 2 | 2753 | 56 | 2 | 1 | 2 |  |
| 4 | Qiaokou | 2 | 2754 | 51 | 2 | 1 | 2 |  |
| 4 | Qiaokou | 2 | 2755 | 46 | 2 | 2 | 2 |  |
| 4 | Qiaokou | 2 | 2756 | 18 | 2 | 1 | 2 |  |
| 4 | Qiaokou | 2 | 2757 | 25 | 2 | 2 | 2 |  |
| 4 | Qiaokou | 2 | 2758 | 67 | 3 | 2 | 2 |  |
| 4 | Qiaokou | 2 | 2759 | 55 | 2 | 1 | 2 |  |
| 4 | Qiaokou | 2 | 2760 | 53 | 2 | 1 | 2 |  |
| 4 | Qiaokou | 2 | 2761 | 38 | 2 | 2 | 2 |  |
| 4 | Qiaokou | 2 | 2762 | 81 | 3 | 1 | 2 |  |
| 4 | Qiaokou | 2 | 2763 | 64 | 2 | 1 | 2 |  |
| 4 | Qiaokou | 2 | 2764 | 72 | 3 | 2 | 2 |  |
| 4 | Qiaokou | 2 | 2765 | 27 | 2 | 1 | 2 |  |
| 4 | Qiaokou | 2 | 2766 | 24 | 2 | 1 | 2 |  |
| 4 | Qiaokou | 2 | 2767 | 30 | 2 | 1 | 2 |  |
| 4 | Qiaokou | 2 | 2768 | 25 | 2 | 2 | 2 |  |
| 4 | Qiaokou | 2 | 2769 | 59 | 2 | 2 | 2 |  |
| 4 | Qiaokou | 2 | 2770 | 47 | 2 | 1 | 2 |  |
| 4 | Qiaokou | 2 | 2771 | 65 | 3 | 1 | 2 |  |
| 4 | Qiaokou | 2 | 2772 | 27 | 2 | 2 | 2 |  |
| 4 | Qiaokou | 2 | 2773 | 45 | 2 | 1 | 2 |  |
| 4 | Qiaokou | 2 | 2774 | 61 | 2 | 1 | 2 |  |
| 4 | Qiaokou | 2 | 2775 | 27 | 2 | 2 | 2 |  |

|   |         |   |      |    |   |   |   |  |
|---|---------|---|------|----|---|---|---|--|
| 4 | Qiaokou | 2 | 2776 | 64 | 2 | 1 | 2 |  |
| 4 | Qiaokou | 2 | 2777 | 26 | 2 | 2 | 2 |  |
| 4 | Qiaokou | 2 | 2778 | 74 | 3 | 1 | 2 |  |
| 4 | Qiaokou | 2 | 2779 | 28 | 2 | 2 | 2 |  |
| 4 | Qiaokou | 2 | 2780 | 59 | 2 | 1 | 2 |  |
| 4 | Qiaokou | 2 | 2781 | 48 | 2 | 1 | 2 |  |
| 4 | Qiaokou | 2 | 2782 | 31 | 2 | 1 | 2 |  |
| 4 | Qiaokou | 2 | 2783 | 58 | 2 | 1 | 2 |  |
| 4 | Qiaokou | 2 | 2784 | 71 | 3 | 1 | 2 |  |
| 4 | Qiaokou | 2 | 2785 | 51 | 2 | 1 | 2 |  |
| 4 | Qiaokou | 2 | 2786 | 43 | 2 | 2 | 2 |  |
| 4 | Qiaokou | 2 | 2787 | 59 | 2 | 1 | 2 |  |
| 4 | Qiaokou | 2 | 2788 | 55 | 2 | 1 | 2 |  |
| 4 | Qiaokou | 2 | 2789 | 51 | 2 | 1 | 2 |  |
| 4 | Qiaokou | 2 | 2790 | 47 | 2 | 1 | 2 |  |
| 4 | Qiaokou | 2 | 2791 | 42 | 2 | 2 | 2 |  |
| 4 | Qiaokou | 2 | 2792 | 60 | 2 | 1 | 2 |  |
| 4 | Qiaokou | 2 | 2793 | 42 | 2 | 2 | 2 |  |
| 4 | Qiaokou | 2 | 2794 | 27 | 2 | 2 | 2 |  |
| 4 | Qiaokou | 2 | 2795 | 24 | 2 | 1 | 2 |  |
| 4 | Qiaokou | 2 | 2796 | 17 | 2 | 2 | 2 |  |
| 4 | Qiaokou | 2 | 2797 | 34 | 2 | 2 | 2 |  |
| 4 | Qiaokou | 2 | 2798 | 33 | 2 | 2 | 2 |  |
| 4 | Qiaokou | 2 | 2799 | 80 | 3 | 1 | 2 |  |
| 4 | Qiaokou | 2 | 2800 | 33 | 2 | 1 | 2 |  |
| 4 | Qiaokou | 2 | 2801 | 55 | 2 | 1 | 2 |  |
| 4 | Qiaokou | 2 | 2802 | 54 | 2 | 2 | 2 |  |
| 4 | Qiaokou | 2 | 2803 | 63 | 2 | 1 | 2 |  |
| 4 | Qiaokou | 2 | 2804 | 47 | 2 | 1 | 2 |  |
| 4 | Qiaokou | 2 | 2805 | 60 | 2 | 1 | 2 |  |
| 4 | Qiaokou | 2 | 2806 | 32 | 2 | 2 | 2 |  |
| 4 | Qiaokou | 2 | 2807 | 32 | 2 | 2 | 2 |  |
| 4 | Qiaokou | 2 | 2808 | 33 | 2 | 1 | 2 |  |
| 4 | Qiaokou | 2 | 2809 | 30 | 2 | 1 | 2 |  |
| 4 | Qiaokou | 2 | 2810 | 67 | 3 | 1 | 2 |  |
| 4 | Qiaokou | 2 | 2811 | 56 | 2 | 1 | 2 |  |
| 4 | Qiaokou | 2 | 2812 | 35 | 2 | 2 | 2 |  |
| 4 | Qiaokou | 2 | 2813 | 21 | 2 | 1 | 2 |  |
| 4 | Qiaokou | 2 | 2814 | 52 | 2 | 1 | 2 |  |
| 4 | Qiaokou | 2 | 2815 | 62 | 2 | 1 | 2 |  |
| 4 | Qiaokou | 2 | 2816 | 25 | 2 | 2 | 2 |  |
| 4 | Qiaokou | 2 | 2817 | 58 | 2 | 1 | 2 |  |
| 4 | Qiaokou | 2 | 2818 | 51 | 2 | 1 | 2 |  |
| 4 | Qiaokou | 2 | 2819 | 38 | 2 | 2 | 2 |  |
| 4 | Qiaokou | 2 | 2820 | 56 | 2 | 1 | 2 |  |
| 4 | Qiaokou | 2 | 2821 | 52 | 2 | 1 | 2 |  |
| 4 | Qiaokou | 2 | 2822 | 32 | 2 | 2 | 2 |  |
| 4 | Qiaokou | 2 | 2823 | 61 | 2 | 1 | 2 |  |
| 4 | Qiaokou | 2 | 2824 | 57 | 2 | 1 | 2 |  |
| 4 | Qiaokou | 2 | 2825 | 56 | 2 | 1 | 2 |  |
| 4 | Qiaokou | 2 | 2826 | 62 | 2 | 2 | 2 |  |
| 4 | Qiaokou | 2 | 2827 | 78 | 3 | 1 | 2 |  |
| 4 | Qiaokou | 2 | 2828 | 53 | 2 | 2 | 2 |  |
| 4 | Qiaokou | 2 | 2829 | 49 | 2 | 1 | 2 |  |

|   |         |   |      |    |   |   |   |  |
|---|---------|---|------|----|---|---|---|--|
| 4 | Qiaokou | 2 | 2830 | 38 | 2 | 2 | 2 |  |
| 4 | Qiaokou | 2 | 2831 | 24 | 2 | 2 | 2 |  |
| 4 | Qiaokou | 2 | 2832 | 52 | 2 | 2 | 2 |  |
| 4 | Qiaokou | 2 | 2833 | 78 | 3 | 1 | 2 |  |
| 4 | Qiaokou | 2 | 2834 | 53 | 2 | 1 | 2 |  |
| 4 | Qiaokou | 2 | 2835 | 18 | 2 | 1 | 2 |  |
| 4 | Qiaokou | 2 | 2836 | 55 | 2 | 1 | 2 |  |
| 4 | Qiaokou | 2 | 2837 | 82 | 3 | 2 | 2 |  |
| 4 | Qiaokou | 2 | 2838 | 37 | 2 | 1 | 2 |  |
| 4 | Qiaokou | 2 | 2839 | 80 | 3 | 1 | 2 |  |
| 4 | Qiaokou | 2 | 2840 | 23 | 2 | 2 | 2 |  |
| 4 | Qiaokou | 2 | 2841 | 27 | 2 | 1 | 2 |  |
| 4 | Qiaokou | 2 | 2842 | 21 | 2 | 1 | 2 |  |
| 4 | Qiaokou | 2 | 2843 | 51 | 2 | 2 | 2 |  |
| 4 | Qiaokou | 2 | 2844 | 47 | 2 | 1 | 2 |  |
| 4 | Qiaokou | 2 | 2845 | 75 | 3 | 1 | 2 |  |
| 4 | Qiaokou | 2 | 2846 | 35 | 2 | 1 | 2 |  |
| 4 | Qiaokou | 2 | 2847 | 56 | 2 | 1 | 2 |  |
| 4 | Qiaokou | 2 | 2848 | 59 | 2 | 1 | 2 |  |
| 4 | Qiaokou | 2 | 2849 | 25 | 2 | 2 | 2 |  |
| 4 | Qiaokou | 2 | 2850 | 31 | 2 | 2 | 2 |  |
| 4 | Qiaokou | 2 | 2851 | 60 | 2 | 1 | 2 |  |
| 4 | Qiaokou | 2 | 2852 | 32 | 2 | 1 | 2 |  |
| 4 | Qiaokou | 2 | 2853 | 54 | 2 | 2 | 2 |  |
| 4 | Qiaokou | 2 | 2854 | 60 | 2 | 1 | 2 |  |
| 4 | Qiaokou | 2 | 2855 | 58 | 2 | 1 | 2 |  |
| 4 | Qiaokou | 2 | 2856 | 66 | 3 | 2 | 2 |  |
| 4 | Qiaokou | 2 | 2857 | 37 | 2 | 2 | 2 |  |
| 4 | Qiaokou | 2 | 2858 | 19 | 2 | 1 | 2 |  |
| 4 | Qiaokou | 2 | 2859 | 25 | 2 | 1 | 2 |  |
| 4 | Qiaokou | 2 | 2860 | 21 | 2 | 1 | 2 |  |
| 4 | Qiaokou | 2 | 2861 | 57 | 2 | 1 | 2 |  |
| 4 | Qiaokou | 2 | 2862 | 56 | 2 | 1 | 2 |  |
| 4 | Qiaokou | 2 | 2863 | 58 | 2 | 1 | 2 |  |
| 4 | Qiaokou | 2 | 2864 | 84 | 3 | 1 | 2 |  |
| 4 | Qiaokou | 2 | 2865 | 50 | 2 | 1 | 2 |  |
| 4 | Qiaokou | 2 | 2866 | 43 | 2 | 1 | 2 |  |
| 4 | Qiaokou | 2 | 2867 | 53 | 2 | 1 | 2 |  |
| 4 | Qiaokou | 2 | 2868 | 86 | 3 | 2 | 2 |  |
| 4 | Qiaokou | 2 | 2869 | 62 | 2 | 1 | 2 |  |
| 4 | Qiaokou | 2 | 2870 | 44 | 2 | 1 | 2 |  |
| 4 | Qiaokou | 2 | 2871 | 84 | 3 | 2 | 2 |  |
| 4 | Qiaokou | 2 | 2872 | 90 | 3 | 1 | 2 |  |
| 4 | Qiaokou | 2 | 2873 | 56 | 2 | 1 | 2 |  |
| 4 | Qiaokou | 2 | 2874 | 51 | 2 | 1 | 2 |  |
| 4 | Qiaokou | 2 | 2875 | 52 | 2 | 1 | 2 |  |
| 4 | Qiaokou | 2 | 2876 | 32 | 2 | 1 | 2 |  |
| 4 | Qiaokou | 2 | 2877 | 70 | 3 | 1 | 2 |  |
| 4 | Qiaokou | 2 | 2878 | 56 | 2 | 1 | 2 |  |
| 4 | Qiaokou | 2 | 2879 | 25 | 2 | 1 | 2 |  |
| 4 | Qiaokou | 2 | 2880 | 63 | 2 | 1 | 2 |  |
| 4 | Qiaokou | 2 | 2881 | 56 | 2 | 2 | 2 |  |
| 4 | Qiaokou | 2 | 2882 | 57 | 2 | 1 | 2 |  |
| 4 | Qiaokou | 2 | 2883 | 19 | 2 | 2 | 2 |  |

|   |         |   |      |    |   |   |   |  |
|---|---------|---|------|----|---|---|---|--|
| 4 | Qiaokou | 2 | 2884 | 77 | 3 | 2 | 2 |  |
| 4 | Qiaokou | 2 | 2885 | 46 | 2 | 2 | 2 |  |
| 4 | Qiaokou | 2 | 2886 | 62 | 2 | 2 | 2 |  |
| 4 | Qiaokou | 2 | 2887 | 51 | 2 | 1 | 2 |  |
| 4 | Qiaokou | 2 | 2888 | 55 | 2 | 1 | 2 |  |
| 4 | Qiaokou | 2 | 2889 | 36 | 2 | 2 | 2 |  |
| 4 | Qiaokou | 2 | 2890 | 58 | 2 | 2 | 2 |  |
| 4 | Qiaokou | 2 | 2891 | 52 | 2 | 2 | 2 |  |
| 4 | Qiaokou | 2 | 2892 | 38 | 2 | 2 | 2 |  |
| 4 | Qiaokou | 2 | 2893 | 17 | 2 | 1 | 2 |  |
| 4 | Qiaokou | 2 | 2894 | 63 | 2 | 1 | 2 |  |
| 4 | Qiaokou | 2 | 2895 | 40 | 2 | 1 | 2 |  |
| 4 | Qiaokou | 2 | 2896 | 21 | 2 | 1 | 2 |  |
| 4 | Qiaokou | 2 | 2897 | 55 | 2 | 1 | 2 |  |
| 4 | Qiaokou | 2 | 2898 | 43 | 2 | 1 | 2 |  |
| 4 | Qiaokou | 2 | 2899 | 36 | 2 | 1 | 2 |  |
| 4 | Qiaokou | 2 | 2900 | 62 | 2 | 1 | 2 |  |
| 4 | Qiaokou | 2 | 2901 | 60 | 2 | 1 | 2 |  |
| 4 | Qiaokou | 2 | 2902 | 23 | 2 | 1 | 2 |  |
| 4 | Qiaokou | 2 | 2903 | 45 | 2 | 2 | 2 |  |
| 4 | Qiaokou | 2 | 2904 | 58 | 2 | 1 | 2 |  |
| 4 | Qiaokou | 2 | 2905 | 52 | 2 | 1 | 2 |  |
| 4 | Qiaokou | 2 | 2906 | 34 | 2 | 2 | 2 |  |
| 4 | Qiaokou | 2 | 2907 | 60 | 2 | 1 | 2 |  |
| 4 | Qiaokou | 2 | 2908 | 58 | 2 | 2 | 2 |  |
| 4 | Qiaokou | 2 | 2909 | 57 | 2 | 1 | 2 |  |
| 4 | Qiaokou | 2 | 2910 | 52 | 2 | 1 | 2 |  |
| 4 | Qiaokou | 2 | 2911 | 57 | 2 | 1 | 2 |  |
| 4 | Qiaokou | 2 | 2912 | 30 | 2 | 2 | 2 |  |
| 4 | Qiaokou | 2 | 2913 | 26 | 2 | 1 | 2 |  |
| 4 | Qiaokou | 2 | 2914 | 64 | 2 | 1 | 2 |  |
| 4 | Qiaokou | 2 | 2915 | 53 | 2 | 1 | 2 |  |
| 4 | Qiaokou | 2 | 2916 | 18 | 2 | 1 | 2 |  |
| 4 | Qiaokou | 2 | 2917 | 22 | 2 | 1 | 2 |  |
| 4 | Qiaokou | 2 | 2918 | 28 | 2 | 1 | 2 |  |
| 4 | Qiaokou | 2 | 2919 | 28 | 2 | 1 | 2 |  |
| 4 | Qiaokou | 2 | 2920 | 57 | 2 | 1 | 2 |  |
| 4 | Qiaokou | 2 | 2921 | 74 | 3 | 1 | 2 |  |
| 4 | Qiaokou | 2 | 2922 | 52 | 2 | 1 | 2 |  |
| 4 | Qiaokou | 2 | 2923 | 52 | 2 | 1 | 2 |  |
| 4 | Qiaokou | 2 | 2924 | 39 | 2 | 1 | 2 |  |
| 4 | Qiaokou | 2 | 2925 | 39 | 2 | 1 | 2 |  |
| 4 | Qiaokou | 2 | 2926 | 54 | 2 | 1 | 2 |  |
| 4 | Qiaokou | 2 | 2927 | 55 | 2 | 1 | 2 |  |
| 4 | Qiaokou | 2 | 2928 | 52 | 2 | 1 | 2 |  |
| 4 | Qiaokou | 2 | 2929 | 44 | 2 | 2 | 2 |  |
| 4 | Qiaokou | 2 | 2930 | 76 | 3 | 1 | 2 |  |
| 4 | Qiaokou | 2 | 2931 | 42 | 2 | 2 | 2 |  |
| 4 | Qiaokou | 2 | 2932 | 74 | 3 | 1 | 2 |  |
| 4 | Qiaokou | 2 | 2933 | 59 | 2 | 1 | 2 |  |
| 4 | Qiaokou | 2 | 2934 | 47 | 2 | 1 | 2 |  |
| 4 | Qiaokou | 2 | 2935 | 51 | 2 | 1 | 2 |  |
| 4 | Qiaokou | 2 | 2936 | 61 | 2 | 1 | 2 |  |
| 4 | Qiaokou | 2 | 2937 | 56 | 2 | 1 | 2 |  |

|   |         |   |      |    |   |   |   |   |
|---|---------|---|------|----|---|---|---|---|
| 4 | Qiaokou | 2 | 2938 | 33 | 2 | 1 | 2 |   |
| 4 | Qiaokou | 2 | 2939 | 33 | 2 | 1 | 2 |   |
| 4 | Qiaokou | 2 | 2940 | 41 | 2 | 2 | 2 |   |
| 4 | Qiaokou | 2 | 2941 | 19 | 2 | 1 | 2 |   |
| 4 | Qiaokou | 2 | 2942 | 64 | 2 | 2 | 2 |   |
| 4 | Qiaokou | 2 | 2943 | 42 | 2 | 2 | 2 |   |
| 4 | Qiaokou | 2 | 2944 | 23 | 2 | 1 | 2 |   |
| 4 | Qiaokou | 2 | 2945 | 67 | 3 | 1 | 2 |   |
| 4 | Qiaokou | 2 | 2946 | 89 | 3 | 1 | 2 |   |
| 4 | Qiaokou | 2 | 2947 | 54 | 2 | 2 | 2 |   |
| 4 | Qiaokou | 2 | 2948 | 61 | 2 | 2 | 2 |   |
| 4 | Qiaokou | 2 | 2949 | 42 | 2 | 1 | 2 |   |
| 4 | Qiaokou | 2 | 2950 | 63 | 2 | 1 | 2 |   |
| 4 | Qiaokou | 2 | 2951 | 25 | 2 | 1 | 2 |   |
| 4 | Qiaokou | 2 | 2952 | 53 | 2 | 1 | 2 |   |
| 4 | Qiaokou | 2 | 2953 | 34 | 2 | 1 | 2 |   |
| 4 | Qiaokou | 2 | 2954 | 21 | 2 | 2 | 2 |   |
| 4 | Qiaokou | 2 | 2955 | 55 | 2 | 1 | 2 |   |
| 4 | Qiaokou | 2 | 2956 | 73 | 3 | 1 | 2 |   |
| 4 | Qiaokou | 2 | 2957 | 46 | 2 | 2 | 2 |   |
| 4 | Qiaokou | 2 | 2958 | 66 | 3 | 1 | 2 |   |
| 4 | Qiaokou | 2 | 2959 | 34 | 2 | 1 | 2 |   |
| 4 | Qiaokou | 2 | 2960 | 36 | 2 | 2 | 2 |   |
| 4 | Qiaokou | 2 | 2961 | 25 | 2 | 2 | 2 |   |
| 4 | Qiaokou | 2 | 2962 | 30 | 2 | 1 | 2 |   |
| 4 | Qiaokou | 2 | 2963 | 61 | 2 | 2 | 1 |   |
| 4 | Qiaokou | 2 | 2964 | 68 | 3 | 1 | 1 |   |
| 4 | Qiaokou | 2 | 2965 | 68 | 3 | 1 | 1 |   |
| 4 | Qiaokou | 2 | 2966 | 16 | 2 | 2 | 1 |   |
| 4 | Qiaokou | 2 | 2967 | 61 | 2 | 2 | 1 |   |
| 4 | Qiaokou | 2 | 2968 | 22 | 2 | 1 | 1 |   |
| 4 | Qiaokou | 2 | 2969 | 57 | 2 | 1 | 1 |   |
| 4 | Qiaokou | 2 | 2970 | 29 | 2 | 1 | 1 |   |
| 4 | Qiaokou | 2 | 2971 | 65 | 3 | 1 | 1 |   |
| 4 | Qiaokou | 2 | 2972 | 59 | 2 | 1 | 1 |   |
| 4 | Qiaokou | 2 | 2973 | 28 | 2 | 2 | 1 |   |
| 4 | Qiaokou | 2 | 2974 | 47 | 2 | 2 | 1 |   |
| 4 | Qiaokou | 2 | 2975 | 57 | 2 | 1 | 1 |   |
| 4 | Qiaokou | 2 | 2976 | 63 | 2 | 1 | 1 |   |
| 4 | Qiaokou | 2 | 2977 | 26 | 2 | 2 | 1 |   |
| 4 | Qiaokou | 2 | 2978 | 46 | 2 | 2 | 1 |   |
| 4 | Qiaokou | 2 | 2979 | 66 | 3 | 1 | 1 |   |
| 4 | Qiaokou | 2 | 2980 | 31 | 2 | 1 | 1 |   |
| 4 | Qiaokou | 2 | 2981 | 67 | 3 | 1 | 1 |   |
| 4 | Qiaokou | 2 | 2982 | 9  | 1 | 1 | 1 |   |
| 4 | Qiaokou | 2 | 2983 | 65 | 3 | 1 | 1 |   |
| 4 | Qiaokou | 2 | 2984 | 58 | 2 | 2 | 1 |   |
| 4 | Qiaokou | 2 | 2985 | 66 | 3 | 1 | 1 |   |
| 4 | Qiaokou | 2 | 2986 | 12 | 1 | 2 | 1 |   |
| 4 | Qiaokou | 2 | 2987 | 27 | 2 | 2 | 1 |   |
| 4 | Qiaokou | 2 | 2988 | 35 | 2 | 2 | 1 |   |
| 4 | Qiaokou | 2 | 2989 | 24 | 2 | 2 | 1 |   |
| 5 | Danyang | 1 | 2990 | 22 | 2 | 1 | 1 |   |
| 5 | Danyang | 1 | 2991 | 76 | 3 | 1 | 1 | 1 |



|   |         |   |      |    |   |   |   |   |
|---|---------|---|------|----|---|---|---|---|
| 5 | Danyang | 1 | 2992 | 33 | 2 | 1 | 1 |   |
| 5 | Danyang | 1 | 2993 | 66 | 3 | 1 | 1 | 1 |
| 5 | Danyang | 1 | 2994 | 61 | 2 | 1 | 1 | 1 |
| 5 | Danyang | 1 | 2995 | 57 | 2 | 2 | 1 | 1 |
| 5 | Danyang | 1 | 2996 | 78 | 3 | 1 | 1 | 1 |
| 5 | Danyang | 1 | 2997 | 42 | 2 | 1 | 1 | 1 |
| 5 | Danyang | 1 | 2998 | 50 | 2 | 2 | 1 | 1 |
| 5 | Danyang | 1 | 2999 | 54 | 2 | 2 | 1 | 1 |
| 5 | Danyang | 1 | 3000 | 46 | 2 | 2 | 1 | 1 |
| 5 | Danyang | 1 | 3001 | 66 | 3 | 2 |   | 1 |
| 5 | Danyang | 1 | 3002 | 63 | 2 | 2 | 1 | 1 |
| 5 | Danyang | 1 | 3003 | 67 | 3 | 1 | 1 |   |
| 5 | Danyang | 1 | 3004 | 85 | 3 | 1 | 1 | 1 |
| 5 | Danyang | 1 | 3005 | 28 | 2 | 1 | 1 | 1 |
| 5 | Danyang | 1 | 3006 | 39 | 2 | 1 | 1 | 1 |
| 5 | Danyang | 1 | 3007 | 16 | 2 | 1 | 1 | 1 |
| 5 | Danyang | 1 | 3008 | 61 | 2 | 2 |   | 1 |
| 5 | Danyang | 1 | 3009 | 62 | 2 | 2 | 1 |   |
| 5 | Danyang | 1 | 3010 | 72 | 3 | 2 | 1 |   |
| 5 | Danyang | 1 | 3011 | 22 | 2 | 2 | 1 |   |
| 5 | Danyang | 1 | 3012 | 20 | 2 | 1 | 1 | 1 |
| 5 | Danyang | 1 | 3013 | 65 | 3 | 1 | 1 | 1 |
| 5 | Danyang | 1 | 3014 | 62 | 2 | 1 | 1 |   |
| 5 | Danyang | 1 | 3015 | 46 | 2 | 1 | 1 |   |
| 5 | Danyang | 1 | 3016 | 39 | 2 | 2 | 1 | 1 |
| 5 | Danyang | 1 | 3017 | 61 | 2 | 1 | 1 | 1 |
| 5 | Danyang | 1 | 3018 | 77 | 3 | 1 | 1 | 1 |
| 5 | Danyang | 1 | 3019 | 44 | 2 | 1 | 1 | 1 |
| 5 | Danyang | 1 | 3020 | 59 | 2 | 1 | 1 | 1 |
| 5 | Danyang | 1 | 3021 | 54 | 2 | 1 | 1 | 1 |
| 5 | Danyang | 1 | 3022 | 93 | 3 | 1 | 1 |   |
| 5 | Danyang | 1 | 3023 | 58 | 2 | 1 | 1 | 1 |
| 5 | Danyang | 1 | 3024 | 54 | 2 | 1 | 1 | 1 |
| 5 | Danyang | 1 | 3025 | 66 | 3 | 1 | 1 | 1 |
| 5 | Danyang | 1 | 3026 | 44 | 2 | 2 | 1 |   |
| 5 | Danyang | 1 | 3027 | 24 | 2 | 1 | 1 | 1 |
| 5 | Danyang | 1 | 3028 | 53 | 2 | 2 | 1 | 1 |
| 5 | Danyang | 1 | 3029 | 80 | 3 | 2 | 1 | 1 |
| 5 | Danyang | 1 | 3030 | 24 | 2 | 1 | 1 |   |
| 5 | Danyang | 1 | 3031 | 33 | 2 | 1 | 1 | 1 |
| 5 | Danyang | 1 | 3032 | 52 | 2 | 2 | 1 | 1 |
| 5 | Danyang | 1 | 3033 | 56 | 2 | 2 | 1 | 1 |
| 5 | Danyang | 1 | 3034 | 31 | 2 | 2 | 1 | 1 |
| 5 | Danyang | 1 | 3035 | 44 | 2 | 1 | 1 | 1 |
| 5 | Danyang | 1 | 3036 | 42 | 2 | 1 | 1 |   |
| 5 | Danyang | 1 | 3037 | 68 | 3 | 1 | 1 | 1 |
| 5 | Danyang | 1 | 3038 | 75 | 3 | 2 | 1 | 1 |
| 5 | Danyang | 1 | 3039 | 45 | 2 | 1 | 1 |   |
| 5 | Danyang | 1 | 3040 | 21 | 2 | 2 | 1 | 1 |
| 5 | Danyang | 1 | 3041 | 64 | 2 | 1 | 1 | 1 |
| 5 | Danyang | 1 | 3042 | 28 | 2 | 1 | 1 |   |
| 5 | Danyang | 1 | 3043 | 40 | 2 | 1 | 1 | 1 |
| 5 | Danyang | 1 | 3044 | 52 | 2 | 1 | 1 | 1 |
| 5 | Danyang | 1 | 3045 | 76 | 3 | 1 | 1 |   |

|   |         |   |      |    |   |   |   |   |
|---|---------|---|------|----|---|---|---|---|
| 5 | Danyang | 1 | 3046 | 67 | 3 | 1 | 1 | 1 |
| 5 | Danyang | 1 | 3047 | 73 | 3 | 2 |   | 1 |
| 5 | Danyang | 1 | 3048 | 44 | 2 | 1 | 1 | 1 |
| 5 | Danyang | 1 | 3049 | 50 | 2 | 1 |   | 1 |
| 5 | Danyang | 1 | 3050 | 74 | 3 | 2 | 1 | 1 |
| 5 | Danyang | 1 | 3051 | 64 | 2 | 1 | 1 | 1 |
| 5 | Danyang | 1 | 3052 | 86 | 3 | 1 |   | 1 |
| 5 | Danyang | 1 | 3053 | 51 | 2 | 1 | 1 | 1 |
| 5 | Danyang | 1 | 3054 | 47 | 2 | 2 | 1 |   |
| 5 | Danyang | 1 | 3055 | 61 | 2 | 2 | 1 | 1 |
| 5 | Danyang | 1 | 3056 | 79 | 3 | 1 | 1 | 1 |
| 5 | Danyang | 1 | 3057 | 76 | 3 | 1 | 1 |   |
| 5 | Danyang | 1 | 3058 | 46 | 2 | 2 | 1 | 1 |
| 5 | Danyang | 1 | 3059 | 81 | 3 | 2 | 1 |   |
| 5 | Danyang | 1 | 3060 | 17 | 2 | 1 | 1 |   |
| 5 | Danyang | 1 | 3061 | 53 | 2 | 2 | 1 | 1 |
| 5 | Danyang | 1 | 3062 | 27 | 2 | 1 | 1 |   |
| 5 | Danyang | 1 | 3063 | 35 | 2 | 2 | 1 |   |
| 5 | Danyang | 1 | 3064 | 57 | 2 | 1 | 1 | 1 |
| 5 | Danyang | 1 | 3065 | 53 | 2 | 1 | 1 | 1 |
| 5 | Danyang | 1 | 3066 | 37 | 2 | 1 | 1 | 1 |
| 5 | Danyang | 1 | 3067 | 50 | 2 | 1 | 1 |   |
| 5 | Danyang | 1 | 3068 | 70 | 3 | 1 | 1 | 1 |
| 5 | Danyang | 1 | 3069 | 51 | 2 | 2 | 1 |   |
| 5 | Danyang | 1 | 3070 | 68 | 3 | 1 | 1 | 1 |
| 5 | Danyang | 1 | 3071 | 28 | 2 | 1 | 1 |   |
| 5 | Danyang | 1 | 3072 | 77 | 3 | 1 | 1 | 1 |
| 5 | Danyang | 1 | 3073 | 70 | 3 | 1 | 1 | 1 |
| 5 | Danyang | 1 | 3074 | 30 | 2 | 2 | 1 |   |
| 5 | Danyang | 1 | 3075 | 34 | 2 | 2 | 1 | 1 |
| 5 | Danyang | 1 | 3076 | 74 | 3 | 1 | 1 | 1 |
| 5 | Danyang | 1 | 3077 | 34 | 2 | 1 | 1 |   |
| 5 | Danyang | 1 | 3078 | 37 | 2 | 1 | 1 |   |
| 5 | Danyang | 1 | 3079 | 58 | 2 | 2 | 1 | 1 |
| 5 | Danyang | 1 | 3080 | 91 | 3 | 1 | 1 |   |
| 5 | Danyang | 1 | 3081 | 58 | 2 | 1 | 1 | 1 |
| 5 | Danyang | 1 | 3082 | 43 | 2 | 1 | 1 | 1 |
| 5 | Danyang | 1 | 3083 | 25 | 2 | 1 | 1 |   |
| 5 | Danyang | 1 | 3084 | 30 | 2 | 1 | 1 | 1 |
| 5 | Danyang | 1 | 3085 | 31 | 2 | 1 | 1 |   |
| 5 | Danyang | 1 | 3086 | 21 | 2 | 1 | 1 | 1 |
| 5 | Danyang | 1 | 3087 | 34 | 2 | 1 | 1 |   |
| 5 | Danyang | 1 | 3088 | 25 | 2 | 1 | 1 |   |
| 5 | Danyang | 1 | 3089 | 37 | 2 | 1 | 1 | 1 |
| 5 | Danyang | 1 | 3090 | 21 | 2 | 1 | 1 | 1 |
| 5 | Danyang | 1 | 3091 | 69 | 3 | 1 | 1 | 1 |
| 5 | Danyang | 1 | 3092 | 85 | 3 | 1 | 1 | 1 |
| 5 | Danyang | 1 | 3093 | 47 | 2 | 1 | 1 | 1 |
| 5 | Danyang | 1 | 3094 | 69 | 3 | 1 | 1 | 1 |
| 5 | Danyang | 1 | 3095 | 53 | 2 | 1 | 1 | 1 |
| 5 | Danyang | 1 | 3096 | 67 | 3 | 1 | 1 | 1 |
| 5 | Danyang | 1 | 3097 | 77 | 3 | 1 | 1 | 1 |
| 5 | Danyang | 1 | 3098 | 53 | 2 | 1 | 1 | 1 |
| 5 | Danyang | 1 | 3099 | 45 | 2 | 1 | 1 |   |

|   |         |   |      |    |   |   |   |   |
|---|---------|---|------|----|---|---|---|---|
| 5 | Danyang | 1 | 3100 | 72 | 3 | 1 | 1 | 1 |
| 5 | Danyang | 1 | 3101 | 67 | 3 | 2 | 1 | 1 |
| 5 | Danyang | 1 | 3102 | 78 | 3 | 2 | 1 |   |
| 5 | Danyang | 1 | 3103 | 67 | 3 | 1 | 1 | 1 |
| 5 | Danyang | 1 | 3104 | 71 | 3 | 1 | 1 | 1 |
| 5 | Danyang | 1 | 3105 | 68 | 3 | 1 | 1 | 1 |
| 5 | Danyang | 1 | 3106 | 75 | 3 | 2 | 1 | 1 |
| 5 | Danyang | 1 | 3107 | 53 | 2 | 2 | 1 | 1 |
| 5 | Danyang | 1 | 3108 | 69 | 3 | 2 | 1 | 1 |
| 5 | Danyang | 1 | 3109 | 18 | 2 | 1 | 1 |   |
| 5 | Danyang | 1 | 3110 | 87 | 3 | 1 | 1 |   |
| 5 | Danyang | 1 | 3111 | 65 | 3 | 2 | 1 | 1 |
| 5 | Danyang | 1 | 3112 | 28 | 2 | 2 | 1 | 1 |
| 5 | Danyang | 1 | 3113 | 56 | 2 | 1 | 1 | 1 |
| 5 | Danyang | 1 | 3114 | 65 | 3 | 2 | 1 |   |
| 5 | Danyang | 1 | 3115 | 45 | 2 | 2 | 1 | 1 |
| 5 | Danyang | 1 | 3116 | 30 | 2 | 2 |   | 1 |
| 5 | Danyang | 1 | 3117 | 24 | 2 | 1 | 1 |   |
| 5 | Danyang | 1 | 3118 | 34 | 2 | 2 | 1 | 1 |
| 5 | Danyang | 1 | 3119 | 60 | 2 | 1 | 1 |   |
| 5 | Danyang | 1 | 3120 | 66 | 3 | 1 | 1 | 1 |
| 5 | Danyang | 1 | 3121 | 74 | 3 | 1 | 1 | 1 |
| 5 | Danyang | 1 | 3122 | 74 | 3 | 1 | 1 | 1 |
| 5 | Danyang | 1 | 3123 | 54 | 2 | 1 | 1 | 1 |
| 5 | Danyang | 1 | 3124 | 23 | 2 | 1 | 1 |   |
| 5 | Danyang | 1 | 3125 | 49 | 2 | 1 | 1 | 1 |
| 5 | Danyang | 1 | 3126 | 41 | 2 | 2 | 1 |   |
| 5 | Danyang | 1 | 3127 | 25 | 2 | 2 | 1 |   |
| 5 | Danyang | 1 | 3128 | 64 | 2 | 1 | 1 | 1 |
| 5 | Danyang | 1 | 3129 | 23 | 2 | 1 | 1 |   |
| 5 | Danyang | 1 | 3130 | 56 | 2 | 1 | 1 | 1 |
| 5 | Danyang | 1 | 3131 | 63 | 2 | 2 | 1 | 1 |
| 5 | Danyang | 1 | 3132 | 28 | 2 | 1 | 1 |   |
| 5 | Danyang | 1 | 3133 | 77 | 3 | 1 | 1 | 1 |
| 5 | Danyang | 1 | 3134 | 58 | 2 | 1 | 1 | 1 |
| 5 | Danyang | 1 | 3135 | 36 | 2 | 1 | 1 |   |
| 5 | Danyang | 1 | 3136 | 51 | 2 | 1 | 1 | 1 |
| 5 | Danyang | 1 | 3137 | 62 | 2 | 2 | 1 | 1 |
| 5 | Danyang | 1 | 3138 | 58 | 2 | 1 | 1 | 1 |
| 5 | Danyang | 1 | 3139 | 81 | 3 | 1 | 1 |   |
| 5 | Danyang | 1 | 3140 | 51 | 2 | 1 | 1 | 1 |
| 5 | Danyang | 1 | 3141 | 49 | 2 | 1 | 1 | 1 |
| 5 | Danyang | 1 | 3142 | 51 | 2 | 1 | 1 | 1 |
| 5 | Danyang | 1 | 3143 | 25 | 2 | 1 |   | 1 |
| 5 | Danyang | 1 | 3144 | 61 | 2 | 2 | 1 | 1 |
| 5 | Danyang | 1 | 3145 | 59 | 2 | 1 | 1 | 1 |
| 5 | Danyang | 1 | 3146 | 47 | 2 | 1 | 1 | 1 |
| 5 | Danyang | 1 | 3147 | 65 | 3 | 1 | 1 |   |
| 5 | Danyang | 1 | 3148 | 73 | 3 | 1 | 1 | 1 |
| 5 | Danyang | 1 | 3149 | 60 | 2 | 1 | 1 |   |
| 5 | Danyang | 1 | 3150 | 79 | 3 | 1 | 1 | 1 |
| 5 | Danyang | 1 | 3151 | 37 | 2 | 1 | 1 | 1 |
| 5 | Danyang | 1 | 3152 | 59 | 2 | 1 | 1 | 1 |
| 5 | Danyang | 1 | 3153 | 33 | 2 | 1 | 1 |   |

|   |         |   |      |    |   |   |   |   |
|---|---------|---|------|----|---|---|---|---|
| 5 | Danyang | 1 | 3154 | 72 | 3 | 1 | 1 | 1 |
| 5 | Danyang | 1 | 3155 | 74 | 3 | 1 | 1 | 1 |
| 5 | Danyang | 1 | 3156 | 42 | 2 | 2 | 1 |   |
| 5 | Danyang | 1 | 3157 | 57 | 2 | 2 | 1 | 1 |
| 5 | Danyang | 1 | 3158 | 35 | 2 | 1 | 1 | 1 |
| 5 | Danyang | 1 | 3159 | 64 | 2 | 1 | 1 | 1 |
| 5 | Danyang | 1 | 3160 | 26 | 2 | 1 | 1 |   |
| 5 | Danyang | 1 | 3161 | 25 | 2 | 1 | 1 |   |
| 5 | Danyang | 1 | 3162 | 28 | 2 | 1 | 1 |   |
| 5 | Danyang | 1 | 3163 | 37 | 2 | 1 | 1 | 1 |
| 5 | Danyang | 1 | 3164 | 76 | 3 | 1 | 1 |   |
| 5 | Danyang | 1 | 3165 | 25 | 2 | 1 | 1 | 1 |
| 5 | Danyang | 1 | 3166 | 63 | 2 | 2 | 1 |   |
| 5 | Danyang | 1 | 3167 | 68 | 3 | 1 | 1 | 1 |
| 5 | Danyang | 1 | 3168 | 67 | 3 | 1 | 1 | 1 |
| 5 | Danyang | 1 | 3169 | 31 | 2 | 1 | 1 | 1 |
| 5 | Danyang | 1 | 3170 | 51 | 2 | 1 | 1 |   |
| 5 | Danyang | 1 | 3171 | 54 | 2 | 2 | 1 | 1 |
| 5 | Danyang | 1 | 3172 | 86 | 3 | 2 | 1 | 1 |
| 5 | Danyang | 1 | 3173 | 66 | 3 | 2 | 1 | 1 |
| 5 | Danyang | 1 | 3174 | 78 | 3 | 1 | 1 | 1 |
| 5 | Danyang | 1 | 3175 | 55 | 2 | 1 | 1 | 1 |
| 5 | Danyang | 1 | 3176 | 29 | 2 | 1 | 1 | 1 |
| 5 | Danyang | 1 | 3177 | 25 | 2 | 1 | 1 |   |
| 5 | Danyang | 1 | 3178 | 22 | 2 | 1 | 1 |   |
| 5 | Danyang | 1 | 3179 | 69 | 3 | 1 | 1 | 1 |
| 5 | Danyang | 1 | 3180 | 28 | 2 | 1 | 1 |   |
| 5 | Danyang | 1 | 3181 | 81 | 3 | 1 | 1 | 1 |
| 5 | Danyang | 1 | 3182 | 51 | 2 | 2 | 1 | 1 |
| 5 | Danyang | 1 | 3183 | 24 | 2 | 1 | 1 |   |
| 5 | Danyang | 1 | 3184 | 63 | 2 | 1 | 1 | 1 |
| 5 | Danyang | 1 | 3185 | 76 | 3 | 1 | 1 | 1 |
| 5 | Danyang | 1 | 3186 | 48 | 2 | 1 | 1 |   |
| 5 | Danyang | 1 | 3187 | 43 | 2 | 1 | 1 |   |
| 5 | Danyang | 1 | 3188 | 70 | 3 | 1 | 1 |   |
| 5 | Danyang | 1 | 3189 | 27 | 2 | 1 | 1 |   |
| 5 | Danyang | 1 | 3190 | 53 | 2 | 1 | 1 |   |
| 5 | Danyang | 1 | 3191 | 80 | 3 | 2 | 1 | 1 |
| 5 | Danyang | 1 | 3192 | 52 | 2 | 2 | 1 |   |
| 5 | Danyang | 1 | 3193 | 74 | 3 | 1 | 1 | 1 |
| 5 | Danyang | 1 | 3194 | 20 | 2 | 2 | 1 |   |
| 5 | Danyang | 1 | 3195 | 53 | 2 | 1 | 1 | 1 |
| 5 | Danyang | 1 | 3196 | 23 | 2 | 1 | 1 | 1 |
| 5 | Danyang | 1 | 3197 | 75 | 3 | 2 | 1 | 1 |
| 5 | Danyang | 1 | 3198 | 64 | 2 | 1 | 1 | 1 |
| 5 | Danyang | 1 | 3199 | 51 | 2 | 1 | 1 | 1 |
| 5 | Danyang | 1 | 3200 | 75 | 3 | 2 |   | 1 |
| 5 | Danyang | 1 | 3201 | 24 | 2 | 1 | 1 | 1 |
| 5 | Danyang | 1 | 3202 | 29 | 2 | 1 | 1 |   |
| 5 | Danyang | 1 | 3203 | 23 | 2 | 1 | 1 | 1 |
| 5 | Danyang | 1 | 3204 | 36 | 2 | 1 | 1 |   |
| 5 | Danyang | 1 | 3205 | 51 | 2 | 1 | 1 | 1 |
| 5 | Danyang | 1 | 3206 | 58 | 2 | 2 | 1 | 1 |
| 5 | Danyang | 1 | 3207 | 82 | 3 | 1 | 1 | 1 |

|   |         |   |      |    |   |   |   |   |
|---|---------|---|------|----|---|---|---|---|
| 5 | Danyang | 1 | 3208 | 76 | 3 | 1 | 1 |   |
| 5 | Danyang | 1 | 3209 | 30 | 2 | 2 | 1 | 1 |
| 5 | Danyang | 1 | 3210 | 72 | 3 | 1 | 1 | 1 |
| 5 | Danyang | 1 | 3211 | 16 | 2 | 1 | 1 |   |
| 5 | Danyang | 1 | 3212 | 54 | 2 | 1 | 1 | 1 |
| 5 | Danyang | 1 | 3213 | 58 | 2 | 1 | 1 | 1 |
| 5 | Danyang | 1 | 3214 | 70 | 3 | 1 | 1 | 1 |
| 5 | Danyang | 1 | 3215 | 25 | 2 | 2 | 1 | 1 |
| 5 | Danyang | 1 | 3216 | 81 | 3 | 1 | 1 | 1 |
| 5 | Danyang | 1 | 3217 | 26 | 2 | 1 | 1 | 1 |
| 5 | Danyang | 1 | 3218 | 25 | 2 | 2 | 1 | 1 |
| 5 | Danyang | 1 | 3219 | 74 | 3 | 1 | 1 | 1 |
| 5 | Danyang | 1 | 3220 | 65 | 3 | 1 | 1 | 1 |
| 5 | Danyang | 1 | 3221 | 83 | 3 | 1 | 1 |   |
| 5 | Danyang | 1 | 3222 | 84 | 3 | 1 | 1 | 1 |
| 5 | Danyang | 1 | 3223 | 53 | 2 | 1 | 1 |   |
| 5 | Danyang | 1 | 3224 | 26 | 2 | 1 | 1 |   |
| 5 | Danyang | 1 | 3225 | 83 | 3 | 1 | 1 | 1 |
| 5 | Danyang | 1 | 3226 | 57 | 2 | 2 | 1 | 1 |
| 5 | Danyang | 1 | 3227 | 36 | 2 | 2 | 1 | 1 |
| 5 | Danyang | 1 | 3228 | 76 | 3 | 1 | 1 | 1 |
| 5 | Danyang | 1 | 3229 | 69 | 3 | 1 | 1 | 1 |
| 5 | Danyang | 1 | 3230 | 58 | 2 | 1 | 1 | 1 |
| 5 | Danyang | 1 | 3231 | 70 | 3 | 2 | 1 | 1 |
| 5 | Danyang | 1 | 3232 | 62 | 2 | 2 | 1 | 1 |
| 5 | Danyang | 1 | 3233 | 47 | 2 | 2 | 1 | 1 |
| 5 | Danyang | 1 | 3234 | 27 | 2 | 1 |   | 1 |
| 5 | Danyang | 1 | 3235 | 87 | 3 | 2 | 1 | 1 |
| 5 | Danyang | 1 | 3236 | 22 | 2 | 1 | 1 |   |
| 5 | Danyang | 1 | 3237 | 62 | 2 | 1 | 1 | 1 |
| 5 | Danyang | 1 | 3238 | 61 | 2 | 1 | 1 | 1 |
| 5 | Danyang | 1 | 3239 | 44 | 2 | 1 | 1 |   |
| 5 | Danyang | 1 | 3240 | 58 | 2 | 2 | 1 | 1 |
| 5 | Danyang | 1 | 3241 | 18 | 2 | 2 | 1 | 1 |
| 5 | Danyang | 1 | 3242 | 67 | 3 | 2 | 1 | 1 |
| 5 | Danyang | 1 | 3243 | 79 | 3 | 2 | 1 |   |
| 5 | Danyang | 1 | 3244 | 75 | 3 | 1 | 1 |   |
| 5 | Danyang | 1 | 3245 | 64 | 2 | 1 | 1 |   |
| 5 | Danyang | 1 | 3246 | 82 | 3 | 1 | 1 | 1 |
| 5 | Danyang | 1 | 3247 | 53 | 2 | 1 | 1 | 1 |
| 5 | Danyang | 1 | 3248 | 51 | 2 | 2 | 1 | 1 |
| 5 | Danyang | 1 | 3249 | 48 | 2 | 1 | 1 | 1 |
| 5 | Danyang | 1 | 3250 | 66 | 3 | 1 | 1 | 1 |
| 5 | Danyang | 1 | 3251 | 57 | 2 | 1 | 1 |   |
| 5 | Danyang | 1 | 3252 | 50 | 2 | 1 | 1 | 1 |
| 5 | Danyang | 1 | 3253 | 60 | 2 | 1 | 1 | 1 |
| 5 | Danyang | 1 | 3254 | 25 | 2 | 2 | 1 |   |
| 5 | Danyang | 1 | 3255 | 40 | 2 | 1 | 1 |   |
| 5 | Danyang | 1 | 3256 | 36 | 2 | 2 | 1 | 1 |
| 5 | Danyang | 1 | 3257 | 64 | 2 | 1 | 1 | 1 |
| 5 | Danyang | 1 | 3258 | 62 | 2 | 1 | 1 | 1 |
| 5 | Danyang | 1 | 3259 | 47 | 2 | 2 |   | 1 |
| 5 | Danyang | 1 | 3260 | 43 | 2 | 1 | 1 | 1 |
| 5 | Danyang | 1 | 3261 | 62 | 2 | 1 | 1 | 1 |

|   |         |   |      |    |   |   |   |   |
|---|---------|---|------|----|---|---|---|---|
| 5 | Danyang | 1 | 3262 | 60 | 2 | 1 | 1 | 1 |
| 5 | Danyang | 1 | 3263 | 54 | 2 | 1 | 1 | 1 |
| 5 | Danyang | 1 | 3264 | 80 | 3 | 2 | 1 | 1 |
| 5 | Danyang | 1 | 3265 | 53 | 2 | 1 | 1 | 1 |
| 5 | Danyang | 1 | 3266 | 20 | 2 | 1 | 1 | 1 |
| 5 | Danyang | 1 | 3267 | 76 | 3 | 2 | 1 | 1 |
| 5 | Danyang | 1 | 3268 | 64 | 2 | 1 | 1 | 1 |
| 5 | Danyang | 1 | 3269 | 46 | 2 | 2 | 1 | 1 |
| 5 | Danyang | 1 | 3270 | 19 | 2 | 1 | 1 |   |
| 5 | Danyang | 1 | 3271 | 56 | 2 | 1 | 1 | 1 |
| 5 | Danyang | 1 | 3272 | 50 | 2 | 1 | 1 |   |
| 5 | Danyang | 1 | 3273 | 61 | 2 | 1 | 1 | 1 |
| 5 | Danyang | 1 | 3274 | 33 | 2 | 1 | 1 |   |
| 5 | Danyang | 1 | 3275 | 24 | 2 | 2 | 1 | 1 |
| 5 | Danyang | 1 | 3276 | 91 | 3 | 1 | 1 | 1 |
| 5 | Danyang | 1 | 3277 | 65 | 3 | 2 | 1 | 1 |
| 5 | Danyang | 1 | 3278 | 25 | 2 | 2 | 1 |   |
| 5 | Danyang | 1 | 3279 | 56 | 2 | 2 | 1 | 1 |
| 5 | Danyang | 1 | 3280 | 52 | 2 | 1 | 1 |   |
| 5 | Danyang | 1 | 3281 | 61 | 2 | 1 | 1 | 1 |
| 5 | Danyang | 1 | 3282 | 49 | 2 | 1 | 1 | 1 |
| 5 | Danyang | 1 | 3283 | 51 | 2 | 1 | 1 | 1 |
| 5 | Danyang | 1 | 3284 | 52 | 2 | 2 | 1 | 1 |
| 5 | Danyang | 1 | 3285 | 35 | 2 | 2 | 1 | 1 |
| 5 | Danyang | 1 | 3286 | 29 | 2 | 1 | 1 | 1 |
| 5 | Danyang | 1 | 3287 | 31 | 2 | 2 | 1 | 1 |
| 5 | Danyang | 1 | 3288 | 46 | 2 | 1 | 1 |   |
| 5 | Danyang | 1 | 3289 | 52 | 2 | 1 | 1 |   |
| 5 | Danyang | 1 | 3290 | 87 | 3 | 1 | 1 | 1 |
| 5 | Danyang | 1 | 3291 | 77 | 3 | 1 | 1 | 1 |
| 5 | Danyang | 1 | 3292 | 84 | 3 | 1 | 1 |   |
| 5 | Danyang | 1 | 3293 | 41 | 2 | 1 | 1 |   |
| 5 | Danyang | 1 | 3294 | 50 | 2 | 2 | 1 |   |
| 5 | Danyang | 1 | 3295 | 74 | 3 | 1 | 1 | 1 |
| 5 | Danyang | 1 | 3296 | 37 | 2 | 1 | 1 | 1 |
| 5 | Danyang | 1 | 3297 | 42 | 2 | 1 | 1 |   |
| 5 | Danyang | 1 | 3298 | 30 | 2 | 1 | 1 |   |
| 5 | Danyang | 1 | 3299 | 46 | 2 | 1 | 1 | 1 |
| 5 | Danyang | 1 | 3300 | 20 | 2 | 1 | 1 | 1 |
| 5 | Danyang | 1 | 3301 | 30 | 2 | 2 | 1 |   |
| 5 | Danyang | 1 | 3302 | 62 | 2 | 2 | 1 | 1 |
| 5 | Danyang | 1 | 3303 | 51 | 2 | 1 | 1 | 1 |
| 5 | Danyang | 1 | 3304 | 68 | 3 | 1 | 1 | 1 |
| 5 | Danyang | 1 | 3305 | 65 | 3 | 2 | 1 | 1 |
| 5 | Danyang | 1 | 3306 | 42 | 2 | 2 | 1 | 1 |
| 5 | Danyang | 1 | 3307 | 43 | 2 | 2 | 1 |   |
| 5 | Danyang | 1 | 3308 | 26 | 2 | 2 | 1 | 1 |
| 5 | Danyang | 1 | 3309 | 23 | 2 | 2 | 1 |   |
| 5 | Danyang | 1 | 3310 | 78 | 3 | 2 |   | 1 |
| 5 | Danyang | 1 | 3311 | 29 | 2 | 1 | 1 |   |
| 5 | Danyang | 1 | 3312 | 75 | 3 | 2 | 1 | 1 |
| 5 | Danyang | 1 | 3313 | 46 | 2 | 2 | 1 | 1 |
| 5 | Danyang | 1 | 3314 | 39 | 2 | 1 | 1 | 1 |
| 5 | Danyang | 1 | 3315 | 54 | 2 | 1 | 1 | 1 |

|   |         |   |      |    |   |   |   |   |
|---|---------|---|------|----|---|---|---|---|
| 5 | Danyang | 1 | 3316 | 48 | 2 | 1 | 1 |   |
| 5 | Danyang | 1 | 3317 | 26 | 2 | 1 | 1 |   |
| 5 | Danyang | 1 | 3318 | 57 | 2 | 1 | 1 | 1 |
| 5 | Danyang | 1 | 3319 | 61 | 2 | 1 | 1 | 1 |
| 5 | Danyang | 1 | 3320 | 70 | 3 | 1 | 1 | 1 |
| 5 | Danyang | 1 | 3321 | 49 | 2 | 1 | 1 | 1 |
| 5 | Danyang | 1 | 3322 | 24 | 2 | 1 | 1 | 1 |
| 5 | Danyang | 1 | 3323 | 68 | 3 | 2 | 1 |   |
| 5 | Danyang | 1 | 3324 | 29 | 2 | 1 | 1 | 1 |
| 5 | Danyang | 1 | 3325 | 31 | 2 | 2 | 1 | 1 |
| 5 | Danyang | 1 | 3326 | 24 | 2 | 1 | 1 | 1 |
| 5 | Danyang | 1 | 3327 | 85 | 3 | 2 | 1 | 1 |
| 5 | Danyang | 1 | 3328 | 19 | 2 | 1 | 1 | 1 |
| 5 | Danyang | 1 | 3329 | 45 | 2 | 1 | 1 |   |
| 5 | Danyang | 1 | 3330 | 30 | 2 | 1 | 1 |   |
| 5 | Danyang | 1 | 3331 | 40 | 2 | 1 | 1 |   |
| 5 | Danyang | 1 | 3332 | 71 | 3 | 1 | 1 | 1 |
| 5 | Danyang | 1 | 3333 | 64 | 2 | 1 |   | 1 |
| 5 | Danyang | 1 | 3334 | 50 | 2 | 1 | 1 | 1 |
| 5 | Danyang | 1 | 3335 | 62 | 2 | 1 | 1 | 1 |
| 5 | Danyang | 1 | 3336 | 18 | 2 | 1 | 1 |   |
| 5 | Danyang | 1 | 3337 | 42 | 2 | 1 | 1 | 1 |
| 5 | Danyang | 1 | 3338 | 78 | 3 | 1 | 1 | 1 |
| 5 | Danyang | 1 | 3339 | 27 | 2 | 1 | 1 |   |
| 5 | Danyang | 1 | 3340 | 65 | 3 | 2 | 1 | 1 |
| 5 | Danyang | 1 | 3341 | 35 | 2 | 2 | 1 | 1 |
| 5 | Danyang | 1 | 3342 | 36 | 2 | 1 | 1 |   |
| 5 | Danyang | 1 | 3343 | 51 | 2 | 1 | 1 |   |
| 5 | Danyang | 1 | 3344 | 62 | 2 | 1 |   | 1 |
| 5 | Danyang | 1 | 3345 | 80 | 3 | 2 | 1 | 1 |
| 5 | Danyang | 1 | 3346 | 56 | 2 | 1 | 1 | 1 |
| 5 | Danyang | 1 | 3347 | 62 | 2 | 1 | 1 | 1 |
| 5 | Danyang | 1 | 3348 | 22 | 2 | 1 | 1 |   |
| 5 | Danyang | 1 | 3349 | 64 | 2 | 2 | 1 | 1 |
| 5 | Danyang | 1 | 3350 | 51 | 2 | 1 | 1 |   |
| 5 | Danyang | 1 | 3351 | 63 | 2 | 1 | 1 | 1 |
| 5 | Danyang | 1 | 3352 | 77 | 3 | 2 | 1 | 1 |
| 5 | Danyang | 1 | 3353 | 58 | 2 | 1 | 1 | 1 |
| 5 | Danyang | 1 | 3354 | 25 | 2 | 2 | 1 |   |
| 5 | Danyang | 1 | 3355 | 29 | 2 | 1 | 1 | 1 |
| 5 | Danyang | 1 | 3356 | 50 | 2 | 1 | 1 |   |
| 5 | Danyang | 1 | 3357 | 61 | 2 | 1 | 1 | 1 |
| 5 | Danyang | 1 | 3358 | 42 | 2 | 1 | 1 | 1 |
| 5 | Danyang | 1 | 3359 | 76 | 3 | 1 |   | 1 |
| 5 | Danyang | 1 | 3360 | 66 | 3 | 1 | 1 | 1 |
| 5 | Danyang | 1 | 3361 | 19 | 2 | 2 | 1 | 1 |
| 5 | Danyang | 1 | 3362 | 56 | 2 | 1 | 1 | 1 |
| 5 | Danyang | 1 | 3363 | 66 | 3 | 1 | 1 |   |
| 5 | Danyang | 1 | 3364 | 20 | 2 | 1 | 1 |   |
| 5 | Danyang | 1 | 3365 | 29 | 2 | 2 | 1 | 1 |
| 5 | Danyang | 1 | 3366 | 42 | 2 | 1 | 1 |   |
| 5 | Danyang | 1 | 3367 | 73 | 3 | 1 | 1 | 1 |
| 5 | Danyang | 1 | 3368 | 57 | 2 | 1 | 1 | 1 |
| 5 | Danyang | 1 | 3369 | 57 | 2 | 1 | 1 | 1 |

|   |         |   |      |    |   |   |   |   |
|---|---------|---|------|----|---|---|---|---|
| 5 | Danyang | 1 | 3370 | 29 | 2 | 1 | 1 |   |
| 5 | Danyang | 1 | 3371 | 28 | 2 | 2 | 1 |   |
| 5 | Danyang | 1 | 3372 | 41 | 2 | 1 | 1 |   |
| 5 | Danyang | 1 | 3373 | 51 | 2 | 1 | 1 | 1 |
| 5 | Danyang | 1 | 3374 | 76 | 3 | 2 | 1 | 1 |
| 5 | Danyang | 1 | 3375 | 64 | 2 | 2 | 1 | 1 |
| 5 | Danyang | 1 | 3376 | 68 | 3 | 1 | 1 | 1 |
| 5 | Danyang | 1 | 3377 | 74 | 3 | 1 | 1 | 1 |
| 5 | Danyang | 1 | 3378 | 62 | 2 | 1 | 1 | 1 |
| 5 | Danyang | 1 | 3379 | 80 | 3 | 1 | 1 | 1 |
| 5 | Danyang | 1 | 3380 | 68 | 3 | 1 | 1 | 1 |
| 5 | Danyang | 1 | 3381 | 26 | 2 | 2 | 1 |   |
| 5 | Danyang | 1 | 3382 | 32 | 2 | 1 | 1 | 1 |
| 5 | Danyang | 1 | 3383 | 50 | 2 | 1 | 1 | 1 |
| 5 | Danyang | 1 | 3384 | 26 | 2 | 1 | 1 | 1 |
| 5 | Danyang | 1 | 3385 | 54 | 2 | 1 |   | 1 |
| 5 | Danyang | 1 | 3386 | 31 | 2 | 2 | 1 |   |
| 5 | Danyang | 1 | 3387 | 43 | 2 | 2 | 1 |   |
| 5 | Danyang | 1 | 3388 | 34 | 2 | 2 | 1 | 1 |
| 5 | Danyang | 1 | 3389 | 20 | 2 | 2 | 1 | 1 |
| 5 | Danyang | 1 | 3390 | 67 | 3 | 1 |   | 1 |
| 5 | Danyang | 1 | 3391 | 85 | 3 | 1 | 1 | 1 |
| 5 | Danyang | 1 | 3392 | 41 | 2 | 1 | 1 | 1 |
| 5 | Danyang | 1 | 3393 | 58 | 2 | 2 | 1 | 1 |
| 5 | Danyang | 1 | 3394 | 28 | 2 | 1 | 1 | 1 |
| 5 | Danyang | 1 | 3395 | 58 | 2 | 2 | 1 | 1 |
| 5 | Danyang | 1 | 3396 | 43 | 2 | 1 | 1 | 1 |
| 5 | Danyang | 1 | 3397 | 40 | 2 | 1 | 1 | 1 |
| 5 | Danyang | 1 | 3398 | 17 | 2 | 1 | 1 |   |
| 5 | Danyang | 1 | 3399 | 50 | 2 | 2 | 1 | 1 |
| 5 | Danyang | 1 | 3400 | 24 | 2 | 1 | 1 | 1 |
| 5 | Danyang | 1 | 3401 | 38 | 2 | 2 | 1 |   |
| 5 | Danyang | 1 | 3402 | 53 | 2 | 1 | 1 |   |
| 5 | Danyang | 1 | 3403 | 18 | 2 | 1 | 1 |   |
| 5 | Danyang | 1 | 3404 | 64 | 2 | 2 | 1 |   |
| 5 | Danyang | 1 | 3405 | 67 | 3 | 2 | 1 | 1 |
| 5 | Danyang | 1 | 3406 | 51 | 2 | 1 | 1 | 1 |
| 5 | Danyang | 1 | 3407 | 67 | 3 | 1 | 1 | 1 |
| 5 | Danyang | 1 | 3408 | 19 | 2 | 1 | 1 |   |
| 5 | Danyang | 1 | 3409 | 57 | 2 | 1 | 1 | 1 |
| 5 | Danyang | 1 | 3410 | 18 | 2 | 1 | 1 |   |
| 5 | Danyang | 1 | 3411 | 71 | 3 | 2 | 1 | 1 |
| 5 | Danyang | 1 | 3412 | 46 | 2 | 2 | 1 | 1 |
| 5 | Danyang | 1 | 3413 | 64 | 2 | 1 | 1 | 1 |
| 5 | Danyang | 1 | 3414 | 42 | 2 | 1 | 1 |   |
| 5 | Danyang | 1 | 3415 | 50 | 2 | 1 | 1 | 1 |
| 5 | Danyang | 1 | 3416 | 67 | 3 | 1 | 1 | 1 |
| 5 | Danyang | 1 | 3417 | 84 | 3 | 1 | 1 |   |
| 5 | Danyang | 1 | 3418 | 69 | 3 | 2 | 1 | 1 |
| 5 | Danyang | 1 | 3419 | 83 | 3 | 1 | 1 | 1 |
| 5 | Danyang | 1 | 3420 | 57 | 2 | 2 | 1 | 1 |
| 5 | Danyang | 1 | 3421 | 24 | 2 | 1 | 1 | 1 |
| 5 | Danyang | 1 | 3422 | 22 | 2 | 1 | 1 | 1 |
| 5 | Danyang | 1 | 3423 | 52 | 2 | 2 | 1 | 1 |



|   |         |   |      |    |   |   |   |   |
|---|---------|---|------|----|---|---|---|---|
| 5 | Danyang | 1 | 3424 | 84 | 3 | 1 | 1 | 1 |
| 5 | Danyang | 1 | 3425 | 34 | 2 | 2 | 1 |   |
| 5 | Danyang | 1 | 3426 | 34 | 2 | 1 | 1 | 1 |
| 5 | Danyang | 1 | 3427 | 51 | 2 | 1 | 1 | 1 |
| 5 | Danyang | 1 | 3428 | 21 | 2 | 2 | 1 |   |
| 5 | Danyang | 1 | 3429 | 19 | 2 | 2 | 1 |   |
| 5 | Danyang | 1 | 3430 | 60 | 2 | 1 | 1 | 1 |
| 5 | Danyang | 1 | 3431 | 86 | 3 | 1 | 1 | 1 |
| 5 | Danyang | 1 | 3432 | 68 | 3 | 1 | 1 | 1 |
| 5 | Danyang | 1 | 3433 | 63 | 2 | 1 |   | 1 |
| 5 | Danyang | 1 | 3434 | 28 | 2 | 2 | 1 | 1 |
| 5 | Danyang | 1 | 3435 | 50 | 2 | 1 | 1 |   |
| 5 | Danyang | 1 | 3436 | 57 | 2 | 2 | 1 | 1 |
| 5 | Danyang | 1 | 3437 | 78 | 3 | 1 | 1 | 1 |
| 5 | Danyang | 1 | 3438 | 72 | 3 | 2 | 1 |   |
| 5 | Danyang | 1 | 3439 | 79 | 3 | 1 | 1 |   |
| 5 | Danyang | 1 | 3440 | 51 | 2 | 1 | 1 |   |
| 5 | Danyang | 1 | 3441 | 52 | 2 | 1 | 1 |   |
| 5 | Danyang | 1 | 3442 | 59 | 2 | 1 | 1 |   |
| 5 | Danyang | 1 | 3443 | 76 | 3 | 2 | 1 |   |
| 5 | Danyang | 1 | 3444 | 20 | 2 | 1 | 1 |   |
| 5 | Danyang | 1 | 3445 | 44 | 2 | 2 | 1 |   |
| 5 | Danyang | 1 | 3446 | 60 | 2 | 1 | 1 |   |
| 5 | Danyang | 1 | 3447 | 29 | 2 | 1 | 1 |   |
| 5 | Danyang | 1 | 3448 | 25 | 2 | 1 | 1 |   |
| 6 | Minhang | 1 | 3449 | 53 | 2 | 1 | 1 |   |
| 6 | Minhang | 1 | 3450 | 45 | 2 | 1 | 1 |   |
| 6 | Minhang | 1 | 3451 | 18 | 2 | 2 | 1 |   |
| 6 | Minhang | 1 | 3452 | 27 | 2 | 1 | 1 | 1 |
| 6 | Minhang | 1 | 3453 | 80 | 3 | 1 | 1 |   |
| 6 | Minhang | 1 | 3454 | 51 | 2 | 1 | 1 |   |
| 6 | Minhang | 1 | 3455 | 18 | 2 | 1 | 1 |   |
| 6 | Minhang | 1 | 3456 | 22 | 2 | 1 | 1 | 1 |
| 6 | Minhang | 1 | 3457 | 38 | 2 | 1 | 1 |   |
| 6 | Minhang | 1 | 3458 | 67 | 3 | 1 | 1 |   |
| 6 | Minhang | 1 | 3459 | 24 | 2 | 2 | 1 |   |
| 6 | Minhang | 1 | 3460 | 25 | 2 | 1 | 1 |   |
| 6 | Minhang | 1 | 3461 | 27 | 2 | 1 | 1 |   |
| 6 | Minhang | 1 | 3462 | 25 | 2 | 2 | 1 |   |
| 6 | Minhang | 1 | 3463 | 70 | 3 | 2 | 1 | 1 |
| 6 | Minhang | 1 | 3464 | 64 | 2 | 2 | 1 | 1 |
| 6 | Minhang | 1 | 3465 | 45 | 2 | 1 | 1 |   |
| 6 | Minhang | 1 | 3466 | 61 | 2 | 2 | 1 | 1 |
| 6 | Minhang | 1 | 3467 | 49 | 2 | 1 | 1 |   |
| 6 | Minhang | 1 | 3468 | 55 | 2 | 1 | 1 |   |
| 6 | Minhang | 1 | 3469 | 59 | 2 | 1 | 1 |   |
| 6 | Minhang | 1 | 3470 | 27 | 2 | 1 | 1 |   |
| 6 | Minhang | 1 | 3471 | 37 | 2 | 1 | 1 | 1 |
| 6 | Minhang | 1 | 3472 | 47 | 2 | 1 | 1 |   |
| 6 | Minhang | 1 | 3473 | 21 | 2 | 1 | 1 |   |
| 6 | Minhang | 1 | 3474 | 42 | 2 | 2 | 1 |   |
| 6 | Minhang | 1 | 3475 | 26 | 2 | 2 | 1 | 1 |
| 6 | Minhang | 1 | 3476 | 30 | 2 | 1 | 1 | 1 |
| 6 | Minhang | 1 | 3477 | 46 | 2 | 1 | 1 | 1 |

|   |         |   |      |    |   |   |   |   |
|---|---------|---|------|----|---|---|---|---|
| 6 | Minhang | 1 | 3478 | 22 | 2 | 1 | 1 |   |
| 6 | Minhang | 1 | 3479 | 59 | 2 | 2 | 1 | 1 |
| 6 | Minhang | 1 | 3480 | 22 | 2 | 1 | 1 |   |
| 6 | Minhang | 1 | 3481 | 18 | 2 | 1 | 1 | 1 |
| 6 | Minhang | 1 | 3482 | 22 | 2 | 1 | 1 | 1 |
| 6 | Minhang | 1 | 3483 | 33 | 2 | 2 | 1 |   |
| 6 | Minhang | 1 | 3484 | 62 | 2 | 1 | 1 |   |
| 6 | Minhang | 1 | 3485 | 51 | 2 | 1 | 1 |   |
| 6 | Minhang | 1 | 3486 | 17 | 2 | 1 | 1 |   |
| 6 | Minhang | 1 | 3487 | 22 | 2 | 1 | 1 |   |
| 6 | Minhang | 1 | 3488 | 51 | 2 | 1 | 1 |   |
| 6 | Minhang | 1 | 3489 | 21 | 2 | 2 | 1 |   |
| 6 | Minhang | 1 | 3490 | 21 | 2 | 1 | 1 |   |
| 6 | Minhang | 1 | 3491 | 23 | 2 | 1 | 1 |   |
| 6 | Minhang | 1 | 3492 | 26 | 2 | 2 | 1 |   |
| 6 | Minhang | 1 | 3493 | 50 | 2 | 1 | 1 |   |
| 6 | Minhang | 1 | 3494 | 74 | 3 | 1 | 1 |   |
| 6 | Minhang | 1 | 3495 | 82 | 3 | 1 | 1 |   |
| 6 | Minhang | 1 | 3496 | 83 | 3 | 1 | 1 |   |
| 6 | Minhang | 1 | 3497 | 86 | 3 | 1 | 1 |   |
| 6 | Minhang | 1 | 3498 | 60 | 2 | 1 | 1 | 1 |
| 6 | Minhang | 1 | 3499 | 77 | 3 | 1 | 1 |   |
| 6 | Minhang | 1 | 3500 | 78 | 3 | 1 | 1 |   |
| 6 | Minhang | 1 | 3501 | 58 | 2 | 1 | 1 | 1 |
| 6 | Minhang | 1 | 3502 | 32 | 2 | 2 | 1 | 1 |
| 6 | Minhang | 1 | 3503 | 50 | 2 | 1 | 1 |   |
| 6 | Minhang | 1 | 3504 | 44 | 2 | 1 | 1 |   |
| 6 | Minhang | 1 | 3505 | 68 | 3 | 1 | 1 |   |
| 6 | Minhang | 1 | 3506 | 27 | 2 | 2 | 1 |   |
| 6 | Minhang | 1 | 3507 | 60 | 2 | 1 | 1 |   |
| 6 | Minhang | 1 | 3508 | 24 | 2 | 1 | 1 | 1 |
| 6 | Minhang | 1 | 3509 | 55 | 2 | 1 | 1 | 1 |
| 6 | Minhang | 1 | 3510 | 33 | 2 | 2 | 1 | 1 |
| 6 | Minhang | 1 | 3511 | 48 | 2 | 2 | 1 | 1 |
| 6 | Minhang | 1 | 3512 | 59 | 2 | 1 | 1 | 1 |
| 6 | Minhang | 1 | 3513 | 59 | 2 | 1 | 1 |   |
| 6 | Minhang | 1 | 3514 | 18 | 2 | 1 | 1 |   |
| 6 | Minhang | 1 | 3515 | 59 | 2 | 1 |   | 1 |
| 6 | Minhang | 1 | 3516 | 56 | 2 | 1 | 1 |   |
| 6 | Minhang | 1 | 3517 | 44 | 2 | 1 | 1 |   |
| 6 | Minhang | 1 | 3518 | 26 | 2 | 1 | 1 |   |
| 6 | Minhang | 1 | 3519 | 61 | 2 | 2 | 1 |   |
| 6 | Minhang | 1 | 3520 | 51 | 2 | 2 | 1 | 1 |
| 6 | Minhang | 1 | 3521 | 22 | 2 | 1 | 1 |   |
| 6 | Minhang | 1 | 3522 | 26 | 2 | 2 | 1 |   |
| 6 | Minhang | 1 | 3523 | 50 | 2 | 1 | 1 | 1 |
| 6 | Minhang | 1 | 3524 | 53 | 2 | 1 | 1 |   |
| 6 | Minhang | 1 | 3525 | 22 | 2 | 1 | 1 |   |
| 6 | Minhang | 1 | 3526 | 67 | 3 | 1 | 1 |   |
| 6 | Minhang | 1 | 3527 | 49 | 2 | 1 | 1 | 1 |
| 6 | Minhang | 1 | 3528 | 1  | 1 | 2 | 1 | 1 |
| 6 | Minhang | 1 | 3529 | 61 | 2 | 1 | 1 |   |
| 6 | Minhang | 1 | 3530 | 78 | 3 | 1 | 1 |   |
| 6 | Minhang | 1 | 3531 | 24 | 2 | 1 | 1 |   |

|   |         |   |      |    |   |   |   |   |
|---|---------|---|------|----|---|---|---|---|
| 6 | Minhang | 1 | 3532 | 24 | 2 | 2 | 1 |   |
| 6 | Minhang | 1 | 3533 | 34 | 2 | 1 | 1 | 1 |
| 6 | Minhang | 1 | 3534 | 44 | 2 | 1 | 1 |   |
| 6 | Minhang | 1 | 3535 | 25 | 2 | 2 | 1 |   |
| 6 | Minhang | 1 | 3536 | 29 | 2 | 1 | 1 |   |
| 6 | Minhang | 1 | 3537 | 41 | 2 | 1 | 1 |   |
| 6 | Minhang | 1 | 3538 | 39 | 2 | 1 | 1 |   |
| 6 | Minhang | 1 | 3539 | 61 | 2 | 1 | 1 | 1 |
| 6 | Minhang | 1 | 3540 | 22 | 2 | 1 | 1 |   |
| 6 | Minhang | 1 | 3541 | 44 | 2 | 1 | 1 |   |
| 6 | Minhang | 1 | 3542 | 56 | 2 | 1 | 1 |   |
| 6 | Minhang | 1 | 3543 | 25 | 2 | 1 | 1 |   |
| 6 | Minhang | 1 | 3544 | 27 | 2 | 1 | 1 |   |
| 6 | Minhang | 1 | 3545 | 82 | 3 | 1 | 1 |   |
| 6 | Minhang | 1 | 3546 | 25 | 2 | 2 | 1 |   |
| 6 | Minhang | 1 | 3547 | 61 | 2 | 1 | 1 | 1 |
| 6 | Minhang | 1 | 3548 | 29 | 2 | 1 | 1 |   |
| 6 | Minhang | 1 | 3549 | 39 | 2 | 1 | 1 | 1 |
| 6 | Minhang | 1 | 3550 | 61 | 2 | 2 | 1 |   |
| 6 | Minhang | 1 | 3551 | 40 | 2 | 1 | 1 |   |
| 6 | Minhang | 1 | 3552 | 46 | 2 | 1 | 1 |   |
| 6 | Minhang | 1 | 3553 | 25 | 2 | 1 | 1 |   |
| 6 | Minhang | 1 | 3554 | 29 | 2 | 2 | 1 |   |
| 6 | Minhang | 1 | 3555 | 36 | 2 | 2 | 1 |   |
| 6 | Minhang | 1 | 3556 | 24 | 2 | 1 | 1 |   |
| 6 | Minhang | 1 | 3557 | 28 | 2 | 2 | 1 |   |
| 6 | Minhang | 1 | 3558 | 23 | 2 | 2 | 1 |   |
| 6 | Minhang | 1 | 3559 | 26 | 2 | 1 | 1 | 1 |
| 6 | Minhang | 1 | 3560 | 82 | 3 | 1 | 1 | 1 |
| 6 | Minhang | 1 | 3561 | 19 | 2 | 1 | 1 |   |
| 6 | Minhang | 1 | 3562 | 54 | 2 | 1 | 1 | 1 |
| 6 | Minhang | 1 | 3563 | 54 | 2 | 1 | 1 |   |
| 6 | Minhang | 1 | 3564 | 28 | 2 | 1 | 1 |   |
| 6 | Minhang | 1 | 3565 | 27 | 2 | 1 | 1 | 1 |
| 6 | Minhang | 1 | 3566 | 64 | 2 | 1 | 1 |   |
| 6 | Minhang | 1 | 3567 | 25 | 2 | 1 | 1 |   |
| 6 | Minhang | 1 | 3568 | 34 | 2 | 1 | 1 |   |
| 6 | Minhang | 1 | 3569 | 26 | 2 | 1 | 1 |   |
| 6 | Minhang | 1 | 3570 | 28 | 2 | 1 | 1 |   |
| 6 | Minhang | 1 | 3571 | 84 | 3 | 2 | 1 | 1 |
| 6 | Minhang | 1 | 3572 | 50 | 2 | 1 | 1 |   |
| 6 | Minhang | 1 | 3573 | 25 | 2 | 1 | 1 |   |
| 6 | Minhang | 1 | 3574 | 47 | 2 | 1 | 1 |   |
| 6 | Minhang | 1 | 3575 | 35 | 2 | 1 | 1 |   |
| 6 | Minhang | 1 | 3576 | 28 | 2 | 1 | 1 | 1 |
| 6 | Minhang | 1 | 3577 | 22 | 2 | 1 | 1 |   |
| 6 | Minhang | 1 | 3578 | 68 | 3 | 2 | 1 |   |
| 6 | Minhang | 1 | 3579 | 75 | 3 | 2 | 1 |   |
| 6 | Minhang | 1 | 3580 | 28 | 2 | 1 | 1 |   |
| 6 | Minhang | 1 | 3581 | 68 | 3 | 1 | 1 |   |
| 6 | Minhang | 1 | 3582 | 41 | 2 | 2 | 1 |   |
| 6 | Minhang | 1 | 3583 | 46 | 2 | 1 | 1 |   |
| 6 | Minhang | 1 | 3584 | 77 | 3 | 1 | 1 |   |
| 6 | Minhang | 1 | 3585 | 25 | 2 | 1 | 1 |   |

|   |         |   |      |    |   |   |   |   |
|---|---------|---|------|----|---|---|---|---|
| 6 | Minhang | 1 | 3586 | 52 | 2 | 1 | 1 |   |
| 6 | Minhang | 1 | 3587 | 44 | 2 | 2 | 1 |   |
| 6 | Minhang | 1 | 3588 | 46 | 2 | 2 | 1 |   |
| 6 | Minhang | 1 | 3589 | 23 | 2 | 1 | 1 |   |
| 6 | Minhang | 1 | 3590 | 50 | 2 | 2 | 1 |   |
| 6 | Minhang | 1 | 3591 | 50 | 2 | 1 | 1 |   |
| 6 | Minhang | 1 | 3592 | 50 | 2 | 1 | 1 |   |
| 6 | Minhang | 1 | 3593 | 58 | 2 | 2 | 1 |   |
| 6 | Minhang | 1 | 3594 | 60 | 2 | 2 | 1 |   |
| 6 | Minhang | 1 | 3595 | 47 | 2 | 1 | 1 |   |
| 6 | Minhang | 1 | 3596 | 45 | 2 | 1 | 1 |   |
| 6 | Minhang | 1 | 3597 | 18 | 2 | 1 | 1 |   |
| 6 | Minhang | 1 | 3598 | 57 | 2 | 2 | 1 |   |
| 6 | Minhang | 1 | 3599 | 58 | 2 | 1 | 1 |   |
| 6 | Minhang | 1 | 3600 | 31 | 2 | 1 | 1 |   |
| 6 | Minhang | 1 | 3601 | 24 | 2 | 1 | 1 |   |
| 6 | Minhang | 1 | 3602 | 25 | 2 | 1 | 1 |   |
| 6 | Minhang | 1 | 3603 | 40 | 2 | 1 | 1 |   |
| 6 | Minhang | 1 | 3604 | 48 | 2 | 1 | 1 |   |
| 6 | Minhang | 1 | 3605 | 61 | 2 | 1 | 1 |   |
| 6 | Minhang | 1 | 3606 | 62 | 2 | 1 | 1 |   |
| 6 | Minhang | 1 | 3607 | 19 | 2 | 1 | 1 |   |
| 6 | Minhang | 1 | 3608 | 26 | 2 | 1 | 1 |   |
| 6 | Minhang | 1 | 3609 | 35 | 2 | 2 | 1 |   |
| 6 | Minhang | 1 | 3610 | 49 | 2 | 1 | 1 |   |
| 6 | Minhang | 1 | 3611 | 61 | 2 | 1 | 1 | 1 |
| 6 | Minhang | 1 | 3612 | 57 | 2 | 1 | 1 |   |
| 6 | Minhang | 1 | 3613 | 26 | 2 | 1 | 1 |   |
| 6 | Minhang | 1 | 3614 | 25 | 2 | 1 | 1 | 1 |
| 6 | Minhang | 1 | 3615 | 18 | 2 | 1 | 1 |   |
| 6 | Minhang | 1 | 3616 | 30 | 2 | 2 | 1 | 1 |
| 6 | Minhang | 1 | 3617 | 26 | 2 | 1 | 1 |   |
| 6 | Minhang | 1 | 3618 | 21 | 2 | 1 | 1 |   |
| 6 | Minhang | 1 | 3619 | 66 | 3 | 1 | 1 |   |
| 6 | Minhang | 1 | 3620 | 32 | 2 | 1 | 1 |   |
| 6 | Minhang | 1 | 3621 | 17 | 2 | 1 | 1 |   |
| 6 | Minhang | 1 | 3622 | 29 | 2 | 2 | 1 |   |
| 6 | Minhang | 1 | 3623 | 49 | 2 | 1 | 1 |   |
| 6 | Minhang | 1 | 3624 | 66 | 3 | 1 | 1 |   |
| 6 | Minhang | 1 | 3625 | 55 | 2 | 1 | 1 | 1 |
| 6 | Minhang | 1 | 3626 | 34 | 2 | 1 | 1 |   |
| 6 | Minhang | 1 | 3627 | 30 | 2 | 1 | 1 |   |
| 6 | Minhang | 1 | 3628 | 26 | 2 | 1 | 1 |   |
| 6 | Minhang | 1 | 3629 | 21 | 2 | 1 | 1 |   |
| 6 | Minhang | 1 | 3630 | 56 | 2 | 1 | 1 |   |
| 6 | Minhang | 1 | 3631 | 27 | 2 | 1 | 1 |   |
| 6 | Minhang | 1 | 3632 | 37 | 2 | 1 | 1 |   |
| 6 | Minhang | 1 | 3633 | 26 | 2 | 1 | 1 | 1 |
| 6 | Minhang | 1 | 3634 | 84 | 3 | 1 | 1 | 1 |
| 6 | Minhang | 1 | 3635 | 70 | 3 | 1 | 1 | 1 |
| 6 | Minhang | 1 | 3636 | 38 | 2 | 2 | 1 | 1 |
| 6 | Minhang | 1 | 3637 | 65 | 3 | 1 | 1 |   |
| 6 | Minhang | 1 | 3638 | 24 | 2 | 1 | 1 |   |
| 6 | Minhang | 1 | 3639 | 19 | 2 | 1 | 1 |   |

|   |         |   |      |    |   |   |   |   |
|---|---------|---|------|----|---|---|---|---|
| 6 | Minhang | 1 | 3640 | 77 | 3 | 1 | 1 | 1 |
| 6 | Minhang | 1 | 3641 | 25 | 2 | 1 | 1 |   |
| 6 | Minhang | 1 | 3642 | 36 | 2 | 2 | 1 |   |
| 6 | Minhang | 1 | 3643 | 63 | 2 | 1 | 1 |   |
| 6 | Minhang | 1 | 3644 | 44 | 2 | 1 | 1 |   |
| 6 | Minhang | 1 | 3645 | 32 | 2 | 2 | 1 |   |
| 6 | Minhang | 1 | 3646 | 60 | 2 | 2 | 1 |   |
| 6 | Minhang | 1 | 3647 | 26 | 2 | 1 | 1 |   |
| 6 | Minhang | 1 | 3648 | 17 | 2 | 1 | 1 |   |
| 6 | Minhang | 1 | 3649 | 25 | 2 | 1 | 1 |   |
| 6 | Minhang | 1 | 3650 | 27 | 2 | 1 | 1 |   |
| 6 | Minhang | 1 | 3651 | 26 | 2 | 1 | 1 |   |
| 6 | Minhang | 1 | 3652 | 83 | 3 | 2 | 1 | 1 |
| 6 | Minhang | 1 | 3653 | 68 | 3 | 2 | 1 | 1 |
| 6 | Minhang | 1 | 3654 | 20 | 2 | 2 | 1 |   |
| 6 | Minhang | 1 | 3655 | 40 | 2 | 1 | 1 | 1 |
| 6 | Minhang | 1 | 3656 | 74 | 3 | 1 | 1 |   |
| 6 | Minhang | 1 | 3657 | 59 | 2 | 2 | 1 |   |
| 6 | Minhang | 1 | 3658 | 25 | 2 | 1 | 1 | 1 |
| 6 | Minhang | 1 | 3659 | 55 | 2 | 1 | 1 |   |
| 6 | Minhang | 1 | 3660 | 73 | 3 | 1 | 1 | 1 |
| 6 | Minhang | 1 | 3661 | 75 | 3 | 1 | 1 |   |
| 6 | Minhang | 1 | 3662 | 19 | 2 | 1 | 1 |   |
| 6 | Minhang | 1 | 3663 | 23 | 2 | 1 | 1 |   |
| 6 | Minhang | 1 | 3664 | 32 | 2 | 1 | 1 |   |
| 6 | Minhang | 1 | 3665 | 21 | 2 | 2 | 1 |   |
| 6 | Minhang | 1 | 3666 | 21 | 2 | 1 | 1 |   |
| 6 | Minhang | 1 | 3667 | 61 | 2 | 1 | 1 | 1 |
| 6 | Minhang | 1 | 3668 | 32 | 2 | 1 | 1 |   |
| 6 | Minhang | 1 | 3669 | 23 | 2 | 2 | 1 |   |
| 6 | Minhang | 1 | 3670 | 76 | 3 | 1 | 1 |   |
| 6 | Minhang | 1 | 3671 | 84 | 3 | 1 | 1 | 1 |
| 6 | Minhang | 1 | 3672 | 30 | 2 | 1 | 1 |   |
| 6 | Minhang | 1 | 3673 | 66 | 3 | 2 | 1 |   |
| 6 | Minhang | 1 | 3674 | 25 | 2 | 1 | 1 | 1 |
| 6 | Minhang | 1 | 3675 | 60 | 2 | 2 | 1 | 1 |
| 6 | Minhang | 1 | 3676 | 30 | 2 | 2 | 1 |   |
| 6 | Minhang | 1 | 3677 | 18 | 2 | 1 | 1 |   |
| 6 | Minhang | 1 | 3678 | 20 | 2 | 2 | 1 |   |
| 6 | Minhang | 1 | 3679 | 24 | 2 | 2 | 1 |   |
| 6 | Minhang | 1 | 3680 | 43 | 2 | 2 | 1 |   |
| 6 | Minhang | 1 | 3681 | 48 | 2 | 2 | 1 |   |
| 6 | Minhang | 1 | 3682 | 22 | 2 | 1 | 1 | 1 |
| 6 | Minhang | 1 | 3683 | 42 | 2 | 2 | 1 |   |
| 6 | Minhang | 1 | 3684 | 62 | 2 | 1 | 1 | 1 |
| 6 | Minhang | 1 | 3685 | 35 | 2 | 2 | 1 |   |
| 6 | Minhang | 1 | 3686 | 63 | 2 | 1 | 1 |   |
| 6 | Minhang | 1 | 3687 | 41 | 2 | 1 | 1 |   |
| 6 | Minhang | 1 | 3688 | 28 | 2 | 1 | 1 |   |
| 6 | Minhang | 1 | 3689 | 20 | 2 | 1 | 1 |   |
| 6 | Minhang | 1 | 3690 | 25 | 2 | 1 | 1 |   |
| 6 | Minhang | 1 | 3691 | 22 | 2 | 1 | 1 |   |
| 6 | Minhang | 1 | 3692 | 42 | 2 | 1 | 1 |   |
| 6 | Minhang | 1 | 3693 | 21 | 2 | 1 | 1 | 1 |

|   |         |   |      |    |   |   |   |   |
|---|---------|---|------|----|---|---|---|---|
| 6 | Minhang | 1 | 3694 | 26 | 2 | 2 | 1 |   |
| 6 | Minhang | 1 | 3695 | 50 | 2 | 1 | 1 |   |
| 6 | Minhang | 1 | 3696 | 26 | 2 | 1 | 1 |   |
| 6 | Minhang | 1 | 3697 | 67 | 3 | 1 | 1 |   |
| 6 | Minhang | 1 | 3698 | 45 | 2 | 2 | 1 |   |
| 6 | Minhang | 1 | 3699 | 28 | 2 | 1 | 1 |   |
| 6 | Minhang | 1 | 3700 | 25 | 2 | 2 | 1 |   |
| 6 | Minhang | 1 | 3701 | 25 | 2 | 1 | 1 | 1 |
| 6 | Minhang | 1 | 3702 | 53 | 2 | 1 | 1 | 1 |
| 6 | Minhang | 1 | 3703 | 25 | 2 | 1 | 1 |   |
| 6 | Minhang | 1 | 3704 | 59 | 2 | 1 | 1 |   |
| 6 | Minhang | 1 | 3705 | 26 | 2 | 1 | 1 |   |
| 6 | Minhang | 1 | 3706 | 73 | 3 | 2 | 1 | 1 |
| 6 | Minhang | 1 | 3707 | 61 | 2 | 2 | 1 |   |
| 6 | Minhang | 1 | 3708 | 60 | 2 | 1 | 1 |   |
| 6 | Minhang | 1 | 3709 | 28 | 2 | 2 | 1 |   |
| 6 | Minhang | 1 | 3710 | 81 | 3 | 1 | 1 | 1 |
| 6 | Minhang | 1 | 3711 | 19 | 2 | 2 | 1 |   |
| 6 | Minhang | 1 | 3712 | 24 | 2 | 1 | 1 |   |
| 6 | Minhang | 1 | 3713 | 45 | 2 | 1 | 1 |   |
| 6 | Minhang | 1 | 3714 | 26 | 2 | 2 | 1 |   |
| 6 | Minhang | 1 | 3715 | 29 | 2 | 1 | 1 |   |
| 6 | Minhang | 1 | 3716 | 30 | 2 | 1 | 1 |   |
| 6 | Minhang | 1 | 3717 | 24 | 2 | 2 | 1 | 1 |
| 6 | Minhang | 1 | 3718 | 25 | 2 | 1 | 1 |   |
| 6 | Minhang | 1 | 3719 | 26 | 2 | 1 | 1 |   |
| 6 | Minhang | 1 | 3720 | 30 | 2 | 2 | 1 |   |
| 6 | Minhang | 1 | 3721 | 47 | 2 | 1 | 1 |   |
| 6 | Minhang | 1 | 3722 | 26 | 2 | 1 | 1 |   |
| 6 | Minhang | 1 | 3723 | 34 | 2 | 1 | 1 | 1 |
| 6 | Minhang | 1 | 3724 | 39 | 2 | 1 | 1 | 1 |
| 6 | Minhang | 1 | 3725 | 42 | 2 | 1 | 1 |   |
| 6 | Minhang | 1 | 3726 | 66 | 3 | 1 | 1 | 1 |
| 6 | Minhang | 1 | 3727 | 35 | 2 | 1 | 1 | 1 |
| 6 | Minhang | 1 | 3728 | 34 | 2 | 1 | 1 | 1 |
| 6 | Minhang | 1 | 3729 | 28 | 2 | 2 | 1 |   |
| 6 | Minhang | 1 | 3730 | 29 | 2 | 1 | 1 |   |
| 6 | Minhang | 1 | 3731 | 73 | 3 | 2 | 1 | 1 |
| 6 | Minhang | 1 | 3732 | 60 | 2 | 1 | 1 | 1 |
| 6 | Minhang | 1 | 3733 | 28 | 2 | 1 | 1 |   |
| 6 | Minhang | 1 | 3734 | 29 | 2 | 1 | 1 | 1 |
| 6 | Minhang | 1 | 3735 | 46 | 2 | 1 | 1 |   |
| 6 | Minhang | 1 | 3736 | 26 | 2 | 1 | 1 |   |
| 6 | Minhang | 1 | 3737 | 62 | 2 | 1 | 1 |   |
| 6 | Minhang | 1 | 3738 | 26 | 2 | 2 | 1 |   |
| 6 | Minhang | 1 | 3739 | 77 | 3 | 1 | 1 | 1 |
| 6 | Minhang | 1 | 3740 | 58 | 2 | 2 | 1 | 1 |
| 6 | Minhang | 1 | 3741 | 26 | 2 | 1 | 1 | 1 |
| 6 | Minhang | 1 | 3742 | 24 | 2 | 1 | 1 |   |
| 6 | Minhang | 1 | 3743 | 63 | 2 | 1 | 1 |   |
| 6 | Minhang | 1 | 3744 | 60 | 2 | 1 | 1 | 1 |
| 6 | Minhang | 1 | 3745 | 22 | 2 | 1 | 1 |   |
| 6 | Minhang | 1 | 3746 | 29 | 2 | 1 | 1 |   |
| 6 | Minhang | 1 | 3747 | 67 | 3 | 1 | 1 |   |

|   |         |   |      |    |   |   |   |   |
|---|---------|---|------|----|---|---|---|---|
| 6 | Minhang | 1 | 3748 | 47 | 2 | 1 | 1 | 1 |
| 6 | Minhang | 1 | 3749 | 19 | 2 | 2 | 1 |   |
| 6 | Minhang | 1 | 3750 | 28 | 2 | 2 | 1 |   |
| 6 | Minhang | 1 | 3751 | 23 | 2 | 2 | 1 | 1 |
| 6 | Minhang | 1 | 3752 | 52 | 2 | 1 | 1 |   |
| 6 | Minhang | 1 | 3753 | 60 | 2 | 1 | 1 |   |
| 6 | Minhang | 1 | 3754 | 49 | 2 | 2 | 1 | 1 |
| 6 | Minhang | 1 | 3755 | 29 | 2 | 1 | 1 |   |
| 6 | Minhang | 1 | 3756 | 32 | 2 | 1 | 1 |   |
| 6 | Minhang | 1 | 3757 | 47 | 2 | 2 | 1 |   |
| 6 | Minhang | 1 | 3758 | 64 | 2 | 2 | 1 |   |
| 6 | Minhang | 1 | 3759 | 46 | 2 | 2 | 1 | 1 |
| 6 | Minhang | 1 | 3760 | 22 | 2 | 1 | 1 | 1 |
| 6 | Minhang | 1 | 3761 | 27 | 2 | 2 | 1 |   |
| 6 | Minhang | 1 | 3762 | 13 | 1 | 1 | 1 | 1 |
| 6 | Minhang | 1 | 3763 | 25 | 2 | 2 | 1 | 1 |
| 6 | Minhang | 1 | 3764 | 15 | 2 | 1 | 1 |   |
| 6 | Minhang | 1 | 3765 | 67 | 3 | 1 | 1 | 1 |
| 6 | Minhang | 1 | 3766 | 44 | 2 | 1 | 1 |   |
| 6 | Minhang | 1 | 3767 | 33 | 2 | 2 | 1 |   |
| 6 | Minhang | 1 | 3768 | 28 | 2 | 1 | 1 |   |
| 6 | Minhang | 1 | 3769 | 59 | 2 | 2 | 1 |   |
| 6 | Minhang | 1 | 3770 | 64 | 2 | 2 | 1 | 1 |
| 6 | Minhang | 1 | 3771 | 21 | 2 | 2 | 1 |   |
| 6 | Minhang | 1 | 3772 | 27 | 2 | 1 | 1 |   |
| 6 | Minhang | 1 | 3773 | 52 | 2 | 1 | 1 |   |
| 6 | Minhang | 1 | 3774 | 34 | 2 | 2 | 1 |   |
| 6 | Minhang | 1 | 3775 | 69 | 3 | 2 | 1 | 1 |
| 6 | Minhang | 1 | 3776 | 26 | 2 | 1 | 1 |   |
| 6 | Minhang | 1 | 3777 | 33 | 2 | 2 | 1 | 1 |
| 6 | Minhang | 1 | 3778 | 39 | 2 | 2 | 1 |   |
| 6 | Minhang | 1 | 3779 | 32 | 2 | 2 | 1 |   |
| 6 | Minhang | 1 | 3780 | 26 | 2 | 1 | 1 | 1 |
| 6 | Minhang | 1 | 3781 | 50 | 2 | 1 | 1 | 1 |
| 6 | Minhang | 1 | 3782 | 52 | 2 | 1 | 1 |   |
| 6 | Minhang | 1 | 3783 | 22 | 2 | 1 | 1 |   |
| 6 | Minhang | 1 | 3784 | 21 | 2 | 2 | 1 |   |
| 6 | Minhang | 1 | 3785 | 80 | 3 | 1 | 1 | 1 |
| 6 | Minhang | 1 | 3786 | 62 | 2 | 1 | 1 |   |
| 6 | Minhang | 1 | 3787 | 36 | 2 | 1 | 1 | 1 |
| 6 | Minhang | 1 | 3788 | 22 | 2 | 1 | 1 | 1 |
| 6 | Minhang | 1 | 3789 | 50 | 2 | 1 | 1 |   |
| 6 | Minhang | 1 | 3790 | 75 | 3 | 1 | 1 |   |
| 6 | Minhang | 1 | 3791 | 23 | 2 | 1 | 1 |   |
| 6 | Minhang | 1 | 3792 | 39 | 2 | 1 | 1 |   |
| 6 | Minhang | 1 | 3793 | 47 | 2 | 1 | 1 | 1 |
| 6 | Minhang | 1 | 3794 | 38 | 2 | 2 | 1 |   |
| 6 | Minhang | 1 | 3795 | 19 | 2 | 1 | 1 |   |
| 6 | Minhang | 1 | 3796 | 29 | 2 | 1 | 1 |   |
| 6 | Minhang | 1 | 3797 | 34 | 2 | 1 | 1 |   |
| 6 | Minhang | 1 | 3798 | 46 | 2 | 1 | 1 |   |
| 6 | Minhang | 1 | 3799 | 68 | 3 | 1 | 1 | 1 |
| 6 | Minhang | 1 | 3800 | 53 | 2 | 1 | 1 | 1 |
| 6 | Minhang | 1 | 3801 | 20 | 2 | 1 | 1 |   |

|   |         |   |      |    |   |   |   |   |
|---|---------|---|------|----|---|---|---|---|
| 6 | Minhang | 1 | 3802 | 40 | 2 | 1 | 1 | 1 |
| 6 | Minhang | 1 | 3803 | 58 | 2 | 1 | 1 | 1 |
| 6 | Minhang | 1 | 3804 | 16 | 2 | 2 | 1 |   |
| 6 | Minhang | 1 | 3805 | 41 | 2 | 1 | 1 |   |
| 6 | Minhang | 1 | 3806 | 18 | 2 | 1 | 1 | 1 |
| 6 | Minhang | 1 | 3807 | 22 | 2 | 2 | 1 |   |
| 6 | Minhang | 1 | 3808 | 49 | 2 | 2 | 1 |   |
| 6 | Minhang | 1 | 3809 | 22 | 2 | 1 | 1 |   |
| 6 | Minhang | 1 | 3810 | 47 | 2 | 1 | 1 | 1 |
| 6 | Minhang | 1 | 3811 | 29 | 2 | 2 | 1 |   |
| 6 | Minhang | 1 | 3812 | 70 | 3 | 1 | 1 | 1 |
| 6 | Minhang | 1 | 3813 | 32 | 2 | 2 | 1 |   |
| 6 | Minhang | 1 | 3814 | 24 | 2 | 1 | 1 |   |
| 6 | Minhang | 1 | 3815 | 26 | 2 | 1 | 1 |   |
| 6 | Minhang | 1 | 3816 | 26 | 2 | 1 | 1 |   |
| 6 | Minhang | 1 | 3817 | 37 | 2 | 1 | 1 | 1 |
| 6 | Minhang | 1 | 3818 | 52 | 2 | 1 | 1 | 1 |
| 6 | Minhang | 1 | 3819 | 18 | 2 | 1 | 1 |   |
| 6 | Minhang | 1 | 3820 | 42 | 2 | 1 | 1 | 1 |
| 6 | Minhang | 1 | 3821 | 25 | 2 | 1 | 1 |   |
| 6 | Minhang | 1 | 3822 | 61 | 2 | 2 | 1 |   |
| 6 | Minhang | 1 | 3823 | 25 | 2 | 1 | 1 | 1 |
| 6 | Minhang | 1 | 3824 | 26 | 2 | 2 | 1 |   |
| 6 | Minhang | 1 | 3825 | 31 | 2 | 1 | 1 |   |
| 6 | Minhang | 1 | 3826 | 29 | 2 | 1 | 1 | 1 |
| 6 | Minhang | 1 | 3827 | 89 | 3 | 1 | 1 | 1 |
| 6 | Minhang | 1 | 3828 | 35 | 2 | 1 | 1 |   |
| 6 | Minhang | 1 | 3829 | 34 | 2 | 1 | 1 | 1 |
| 6 | Minhang | 1 | 3830 | 49 | 2 | 2 | 1 |   |
| 6 | Minhang | 1 | 3831 | 24 | 2 | 1 | 1 |   |
| 6 | Minhang | 1 | 3832 | 72 | 3 | 1 | 1 |   |
| 6 | Minhang | 1 | 3833 | 36 | 2 | 1 | 1 | 1 |
| 6 | Minhang | 1 | 3834 | 30 | 2 | 1 | 1 | 1 |
| 6 | Minhang | 1 | 3835 | 26 | 2 | 1 | 1 | 1 |
| 6 | Minhang | 1 | 3836 | 52 | 2 | 2 | 1 |   |
| 6 | Minhang | 1 | 3837 | 46 | 2 | 1 | 1 |   |
| 6 | Minhang | 1 | 3838 | 28 | 2 | 1 | 1 | 1 |
| 6 | Minhang | 1 | 3839 | 47 | 2 | 2 | 1 |   |
| 6 | Minhang | 1 | 3840 | 63 | 2 | 1 | 1 | 1 |
| 6 | Minhang | 1 | 3841 | 61 | 2 | 1 | 1 | 1 |
| 6 | Minhang | 1 | 3842 | 46 | 2 | 1 | 1 |   |
| 6 | Minhang | 1 | 3843 | 77 | 3 | 1 | 1 | 1 |
| 6 | Minhang | 1 | 3844 | 27 | 2 | 2 | 1 |   |
| 6 | Minhang | 1 | 3845 | 30 | 2 | 1 | 1 |   |
| 6 | Minhang | 1 | 3846 | 29 | 2 | 2 | 1 | 1 |
| 6 | Minhang | 1 | 3847 | 27 | 2 | 1 | 1 |   |
| 6 | Minhang | 1 | 3848 | 33 | 2 | 1 | 1 |   |
| 6 | Minhang | 1 | 3849 | 55 | 2 | 1 | 1 | 1 |
| 6 | Minhang | 1 | 3850 | 29 | 2 | 1 | 1 |   |
| 6 | Minhang | 1 | 3851 | 66 | 3 | 1 | 1 | 1 |
| 6 | Minhang | 1 | 3852 | 55 | 2 | 1 | 1 |   |
| 6 | Minhang | 1 | 3853 | 29 | 2 | 1 | 1 | 1 |
| 6 | Minhang | 1 | 3854 | 51 | 2 | 1 | 1 |   |
| 6 | Minhang | 1 | 3855 | 69 | 3 | 1 | 1 | 1 |



|   |         |   |      |    |   |   |   |   |
|---|---------|---|------|----|---|---|---|---|
| 6 | Minhang | 1 | 3856 | 35 | 2 | 2 | 1 | 1 |
| 6 | Minhang | 1 | 3857 | 45 | 2 | 1 | 1 |   |
| 6 | Minhang | 1 | 3858 | 61 | 2 | 1 | 1 | 1 |
| 6 | Minhang | 1 | 3859 | 32 | 2 | 1 | 1 | 1 |
| 6 | Minhang | 1 | 3860 | 25 | 2 | 2 | 1 | 1 |
| 6 | Minhang | 1 | 3861 | 43 | 2 | 1 | 1 | 1 |
| 6 | Minhang | 1 | 3862 | 65 | 3 | 1 | 1 | 1 |
| 6 | Minhang | 1 | 3863 | 68 | 3 | 2 | 1 | 1 |
| 6 | Minhang | 1 | 3864 | 80 | 3 | 1 | 1 | 1 |
| 6 | Minhang | 1 | 3865 | 74 | 3 | 1 | 1 | 1 |
| 6 | Minhang | 1 | 3866 | 30 | 2 | 1 | 1 | 1 |
| 6 | Minhang | 1 | 3867 | 39 | 2 | 1 | 1 |   |
| 6 | Minhang | 1 | 3868 | 37 | 2 | 1 | 1 |   |
| 6 | Minhang | 1 | 3869 | 63 | 2 | 1 | 1 | 1 |
| 6 | Minhang | 1 | 3870 | 22 | 2 | 1 | 1 |   |
| 6 | Minhang | 1 | 3871 | 27 | 2 | 1 | 1 |   |
| 6 | Minhang | 1 | 3872 | 30 | 2 | 1 | 1 |   |
| 6 | Minhang | 1 | 3873 | 35 | 2 | 2 | 1 |   |
| 6 | Minhang | 1 | 3874 | 27 | 2 | 1 | 1 |   |
| 6 | Minhang | 1 | 3875 | 50 | 2 | 1 | 1 | 1 |
| 6 | Minhang | 1 | 3876 | 27 | 2 | 1 | 1 | 1 |
| 6 | Minhang | 1 | 3877 | 36 | 2 | 1 | 1 | 1 |
| 6 | Minhang | 1 | 3878 | 39 | 2 | 1 | 1 | 1 |
| 6 | Minhang | 1 | 3879 | 22 | 2 | 2 | 1 |   |
| 6 | Minhang | 1 | 3880 | 22 | 2 | 2 | 1 |   |
| 6 | Minhang | 1 | 3881 | 21 | 2 | 1 | 1 |   |
| 6 | Minhang | 1 | 3882 | 22 | 2 | 2 | 1 |   |
| 6 | Minhang | 1 | 3883 | 46 | 2 | 1 | 1 |   |
| 6 | Minhang | 1 | 3884 | 50 | 2 | 2 | 1 | 1 |
| 6 | Minhang | 1 | 3885 | 42 | 2 | 2 | 1 |   |
| 6 | Minhang | 1 | 3886 | 70 | 3 | 1 | 1 |   |
| 6 | Minhang | 1 | 3887 | 25 | 2 | 1 | 1 |   |
| 6 | Minhang | 1 | 3888 | 20 | 2 | 1 | 1 |   |
| 6 | Minhang | 1 | 3889 | 32 | 2 | 1 | 1 |   |
| 6 | Minhang | 1 | 3890 | 30 | 2 | 1 | 1 |   |
| 6 | Minhang | 1 | 3891 | 23 | 2 | 2 | 1 |   |
| 6 | Minhang | 1 | 3892 | 19 | 2 | 1 | 1 |   |
| 6 | Minhang | 1 | 3893 | 20 | 2 | 2 | 1 |   |
| 6 | Minhang | 1 | 3894 | 30 | 2 | 1 | 1 |   |
| 6 | Minhang | 1 | 3895 | 25 | 2 | 1 | 1 |   |
| 6 | Minhang | 1 | 3896 | 20 | 2 | 1 | 1 |   |
| 6 | Minhang | 1 | 3897 | 36 | 2 | 1 | 1 |   |
| 6 | Minhang | 1 | 3898 | 30 | 2 | 1 | 1 |   |
| 6 | Minhang | 1 | 3899 | 19 | 2 | 1 | 1 |   |
| 6 | Minhang | 1 | 3900 | 37 | 2 | 1 | 1 |   |
| 6 | Minhang | 1 | 3901 | 73 | 3 | 2 | 1 |   |
| 6 | Minhang | 1 | 3902 | 71 | 3 | 1 | 1 |   |
| 6 | Minhang | 1 | 3903 | 24 | 2 | 1 | 1 |   |
| 6 | Minhang | 1 | 3904 | 42 | 2 | 2 | 1 | 1 |
| 6 | Minhang | 1 | 3905 | 29 | 2 | 2 | 1 |   |
| 6 | Minhang | 1 | 3906 | 22 | 2 | 2 | 1 |   |
| 6 | Minhang | 1 | 3907 | 85 | 3 | 1 | 1 | 1 |
| 6 | Minhang | 1 | 3908 | 32 | 2 | 1 | 1 |   |
| 6 | Minhang | 1 | 3909 | 43 | 2 | 1 | 1 |   |

|   |         |   |      |    |   |   |   |   |
|---|---------|---|------|----|---|---|---|---|
| 6 | Minhang | 1 | 3910 | 28 | 2 | 1 | 1 |   |
| 6 | Minhang | 1 | 3911 | 25 | 2 | 1 | 1 |   |
| 6 | Minhang | 1 | 3912 | 30 | 2 | 1 | 1 |   |
| 6 | Minhang | 1 | 3913 | 29 | 2 | 1 | 1 |   |
| 6 | Minhang | 1 | 3914 | 28 | 2 | 1 | 1 |   |
| 6 | Minhang | 1 | 3915 | 25 | 2 | 1 | 1 |   |
| 6 | Minhang | 1 | 3916 | 42 | 2 | 2 | 1 |   |
| 6 | Minhang | 1 | 3917 | 41 | 2 | 1 | 1 |   |
| 6 | Minhang | 1 | 3918 | 31 | 2 | 2 | 1 |   |
| 6 | Minhang | 1 | 3919 | 33 | 2 | 1 | 1 |   |
| 6 | Minhang | 1 | 3920 | 64 | 2 | 1 | 1 | 1 |
| 6 | Minhang | 1 | 3921 | 59 | 2 | 2 | 1 | 1 |
| 6 | Minhang | 1 | 3922 | 21 | 2 | 1 | 1 | 1 |
| 6 | Minhang | 1 | 3923 | 22 | 2 | 1 | 1 |   |
| 6 | Minhang | 1 | 3924 | 71 | 3 | 1 | 1 |   |
| 6 | Minhang | 1 | 3925 | 38 | 2 | 2 | 1 |   |
| 6 | Minhang | 1 | 3926 | 22 | 2 | 1 | 1 |   |
| 6 | Minhang | 1 | 3927 | 53 | 2 | 1 | 1 |   |
| 6 | Minhang | 1 | 3928 | 23 | 2 | 1 | 1 |   |
| 6 | Minhang | 1 | 3929 | 49 | 2 | 1 | 1 | 1 |
| 6 | Minhang | 1 | 3930 | 20 | 2 | 1 | 1 |   |
| 6 | Minhang | 1 | 3931 | 35 | 2 | 1 | 1 | 1 |
| 6 | Minhang | 1 | 3932 | 42 | 2 | 1 | 1 | 1 |
| 6 | Minhang | 1 | 3933 | 26 | 2 | 1 | 1 | 1 |
| 6 | Minhang | 1 | 3934 | 23 | 2 | 2 | 1 |   |
| 6 | Minhang | 1 | 3935 | 28 | 2 | 1 | 1 | 1 |
| 6 | Minhang | 1 | 3936 | 45 | 2 | 1 | 1 |   |
| 6 | Minhang | 1 | 3937 | 64 | 2 | 1 | 1 |   |
| 6 | Minhang | 1 | 3938 | 60 | 2 | 1 | 1 |   |
| 6 | Minhang | 1 | 3939 | 61 | 2 | 1 | 1 | 1 |
| 6 | Minhang | 1 | 3940 | 23 | 2 | 1 | 1 |   |
| 6 | Minhang | 1 | 3941 | 46 | 2 | 1 | 1 |   |
| 6 | Minhang | 1 | 3942 | 68 | 3 | 1 | 1 | 1 |
| 6 | Minhang | 1 | 3943 | 35 | 2 | 1 | 1 | 1 |
| 6 | Minhang | 1 | 3944 | 32 | 2 | 2 | 1 | 1 |
| 6 | Minhang | 1 | 3945 | 28 | 2 | 2 | 1 |   |
| 6 | Minhang | 1 | 3946 | 41 | 2 | 2 | 1 | 1 |
| 6 | Minhang | 1 | 3947 | 52 | 2 | 1 | 1 |   |
| 6 | Minhang | 1 | 3948 | 26 | 2 | 1 | 1 |   |
| 6 | Minhang | 1 | 3949 | 27 | 2 | 1 | 1 |   |
| 6 | Minhang | 1 | 3950 | 36 | 2 | 1 | 1 |   |
| 6 | Minhang | 1 | 3951 | 30 | 2 | 1 | 1 |   |
| 6 | Minhang | 1 | 3952 | 24 | 2 | 1 | 1 |   |
| 6 | Minhang | 1 | 3953 | 43 | 2 | 1 | 1 |   |
| 6 | Minhang | 1 | 3954 | 23 | 2 | 2 | 1 |   |
| 6 | Minhang | 1 | 3955 | 55 | 2 | 2 | 1 |   |
| 6 | Minhang | 1 | 3956 | 62 | 2 | 1 | 1 |   |
| 6 | Minhang | 1 | 3957 | 37 | 2 | 1 | 1 |   |
| 6 | Minhang | 1 | 3958 | 52 | 2 | 1 | 1 |   |
| 6 | Minhang | 1 | 3959 | 35 | 2 | 1 | 1 |   |
| 6 | Minhang | 1 | 3960 | 35 | 2 | 1 | 1 |   |
| 6 | Minhang | 1 | 3961 | 46 | 2 | 1 | 1 |   |
| 6 | Minhang | 1 | 3962 | 21 | 2 | 1 | 1 |   |
| 6 | Minhang | 1 | 3963 | 34 | 2 | 1 | 1 |   |

|   |         |   |      |    |   |   |   |  |
|---|---------|---|------|----|---|---|---|--|
| 6 | Minhang | 1 | 3964 | 32 | 2 | 1 | 1 |  |
| 6 | Minhang | 1 | 3965 | 29 | 2 | 1 | 1 |  |
| 6 | Minhang | 1 | 3966 | 35 | 2 | 1 | 1 |  |
| 6 | Minhang | 1 | 3967 | 22 | 2 | 2 | 1 |  |
| 6 | Minhang | 1 | 3968 | 21 | 2 | 2 | 1 |  |
| 6 | Minhang | 1 | 3969 | 43 | 2 | 1 | 1 |  |
| 6 | Minhang | 1 | 3970 | 64 | 2 | 2 | 1 |  |
| 6 | Minhang | 1 | 3971 | 51 | 2 | 1 | 1 |  |
| 6 | Minhang | 1 | 3972 | 50 | 2 | 1 | 1 |  |
| 6 | Minhang | 1 | 3973 | 19 | 2 | 1 | 1 |  |
| 6 | Minhang | 1 | 3974 | 22 | 2 | 1 | 1 |  |
| 6 | Minhang | 1 | 3975 | 31 | 2 | 1 | 1 |  |
| 6 | Minhang | 1 | 3976 | 22 | 2 | 1 | 1 |  |
| 6 | Minhang | 1 | 3977 | 44 | 2 | 1 | 1 |  |
| 6 | Minhang | 1 | 3978 | 38 | 2 | 2 | 1 |  |
| 6 | Minhang | 1 | 3979 | 37 | 2 | 1 | 1 |  |
| 6 | Minhang | 1 | 3980 | 27 | 2 | 2 | 1 |  |
| 6 | Minhang | 1 | 3981 | 46 | 2 | 1 | 1 |  |
| 6 | Minhang | 1 | 3982 | 26 | 2 | 1 | 1 |  |
| 6 | Minhang | 1 | 3983 | 43 | 2 | 1 | 1 |  |
| 6 | Minhang | 1 | 3984 | 26 | 2 | 1 | 1 |  |
| 6 | Minhang | 1 | 3985 | 46 | 2 | 1 | 1 |  |
| 6 | Minhang | 1 | 3986 | 19 | 2 | 2 | 1 |  |
| 6 | Minhang | 1 | 3987 | 28 | 2 | 1 | 1 |  |
| 6 | Minhang | 1 | 3988 | 59 | 2 | 1 | 1 |  |
| 6 | Minhang | 1 | 3989 | 66 | 3 | 1 | 1 |  |
| 6 | Minhang | 1 | 3990 | 24 | 2 | 1 | 1 |  |
| 6 | Minhang | 1 | 3991 | 37 | 2 | 1 | 1 |  |
| 6 | Minhang | 1 | 3992 | 60 | 2 | 1 | 1 |  |
| 6 | Minhang | 1 | 3993 | 60 | 2 | 1 | 1 |  |
| 6 | Minhang | 1 | 3994 | 62 | 2 | 1 | 1 |  |
| 6 | Minhang | 1 | 3995 | 23 | 2 | 1 | 1 |  |
| 6 | Minhang | 1 | 3996 | 46 | 2 | 1 | 1 |  |
| 6 | Minhang | 1 | 3997 | 60 | 2 | 1 | 1 |  |
| 6 | Minhang | 1 | 3998 | 33 | 2 | 1 | 1 |  |
| 6 | Minhang | 1 | 3999 | 40 | 2 | 1 | 1 |  |
| 6 | Minhang | 1 | 4000 | 39 | 2 | 1 | 1 |  |
| 6 | Minhang | 1 | 4001 | 19 | 2 | 2 | 1 |  |
| 6 | Minhang | 1 | 4002 | 36 | 2 | 1 | 1 |  |
| 6 | Minhang | 1 | 4003 | 76 | 3 | 1 | 1 |  |
| 6 | Minhang | 1 | 4004 | 23 | 2 | 2 | 1 |  |
| 6 | Minhang | 1 | 4005 | 26 | 2 | 1 | 1 |  |
| 6 | Minhang | 1 | 4006 | 22 | 2 | 1 | 1 |  |
| 6 | Minhang | 1 | 4007 | 28 | 2 | 1 | 1 |  |
| 6 | Minhang | 1 | 4008 | 59 | 2 | 1 | 1 |  |
| 6 | Minhang | 1 | 4009 | 15 | 2 | 1 | 1 |  |
| 6 | Minhang | 1 | 4010 | 23 | 2 | 1 | 1 |  |
| 6 | Minhang | 1 | 4011 | 68 | 3 | 2 | 1 |  |
| 6 | Minhang | 1 | 4012 | 46 | 2 | 1 | 1 |  |
| 6 | Minhang | 1 | 4013 | 92 | 3 | 1 | 1 |  |
| 6 | Minhang | 1 | 4014 | 26 | 2 | 2 | 1 |  |
| 6 | Minhang | 1 | 4015 | 36 | 2 | 1 | 1 |  |
| 6 | Minhang | 1 | 4016 | 60 | 2 | 2 | 1 |  |
| 6 | Minhang | 1 | 4017 | 22 | 2 | 1 | 1 |  |

|   |         |   |      |    |   |   |   |  |
|---|---------|---|------|----|---|---|---|--|
| 6 | Minhang | 1 | 4018 | 54 | 2 | 1 | 1 |  |
| 6 | Minhang | 1 | 4019 | 24 | 2 | 1 | 1 |  |
| 6 | Minhang | 1 | 4020 | 38 | 2 | 2 | 1 |  |
| 6 | Minhang | 1 | 4021 | 25 | 2 | 1 | 1 |  |
| 6 | Minhang | 1 | 4022 | 32 | 2 | 1 | 1 |  |
| 6 | Minhang | 1 | 4023 | 87 | 3 | 1 | 1 |  |
| 6 | Minhang | 1 | 4024 | 25 | 2 | 2 | 1 |  |
| 6 | Minhang | 1 | 4025 | 29 | 2 | 1 | 1 |  |
| 6 | Minhang | 1 | 4026 | 71 | 3 | 1 | 1 |  |
| 6 | Minhang | 1 | 4027 | 28 | 2 | 1 | 1 |  |
| 6 | Minhang | 1 | 4028 | 69 | 3 | 1 | 1 |  |
| 6 | Minhang | 1 | 4029 | 64 | 2 | 1 | 1 |  |
| 6 | Minhang | 1 | 4030 | 50 | 2 | 2 | 1 |  |
| 6 | Minhang | 1 | 4031 | 31 | 2 | 1 | 1 |  |
| 6 | Minhang | 1 | 4032 | 47 | 2 | 1 | 1 |  |
| 6 | Minhang | 1 | 4033 | 31 | 2 | 1 | 1 |  |
| 6 | Minhang | 1 | 4034 | 24 | 2 | 2 | 1 |  |
| 6 | Minhang | 1 | 4035 | 22 | 2 | 1 | 1 |  |
| 6 | Minhang | 1 | 4036 | 20 | 2 | 1 | 1 |  |
| 6 | Minhang | 1 | 4037 | 90 | 3 | 1 | 1 |  |
| 6 | Minhang | 1 | 4038 | 26 | 2 | 2 | 1 |  |
| 6 | Minhang | 1 | 4039 | 27 | 2 | 1 | 1 |  |
| 6 | Minhang | 1 | 4040 | 74 | 3 | 1 | 1 |  |
| 6 | Minhang | 1 | 4041 | 54 | 2 | 1 | 1 |  |
| 6 | Minhang | 1 | 4042 | 83 | 3 | 1 | 1 |  |
| 6 | Minhang | 1 | 4043 | 76 | 3 | 2 | 1 |  |
| 6 | Minhang | 1 | 4044 | 29 | 2 | 1 | 1 |  |
| 6 | Minhang | 1 | 4045 | 39 | 2 | 1 | 1 |  |
| 6 | Minhang | 1 | 4046 | 21 | 2 | 1 | 1 |  |
| 6 | Minhang | 1 | 4047 | 21 | 2 | 1 | 1 |  |
| 6 | Minhang | 1 | 4048 | 58 | 2 | 1 | 1 |  |
| 6 | Minhang | 1 | 4049 | 51 | 2 | 2 | 1 |  |
| 6 | Minhang | 1 | 4050 | 82 | 3 | 1 | 1 |  |
| 6 | Minhang | 1 | 4051 | 18 | 2 | 2 | 1 |  |
| 6 | Minhang | 1 | 4052 | 65 | 3 | 1 | 1 |  |
| 6 | Minhang | 1 | 4053 | 19 | 2 | 1 | 1 |  |
| 6 | Minhang | 1 | 4054 | 18 | 2 | 1 | 1 |  |
| 6 | Minhang | 1 | 4055 | 29 | 2 | 2 | 1 |  |
| 6 | Minhang | 1 | 4056 | 57 | 2 | 2 | 1 |  |
| 6 | Minhang | 1 | 4057 | 29 | 2 | 1 | 1 |  |
| 6 | Minhang | 1 | 4058 | 32 | 2 | 1 | 1 |  |
| 6 | Minhang | 1 | 4059 | 25 | 2 | 1 | 1 |  |
| 6 | Minhang | 1 | 4060 | 82 | 3 | 1 | 1 |  |
| 6 | Minhang | 1 | 4061 | 28 | 2 | 1 | 1 |  |
| 6 | Minhang | 1 | 4062 | 24 | 2 | 2 | 1 |  |
| 6 | Minhang | 1 | 4063 | 21 | 2 | 2 | 1 |  |
| 6 | Minhang | 1 | 4064 | 28 | 2 | 1 | 1 |  |
| 6 | Minhang | 1 | 4065 | 28 | 2 | 1 | 1 |  |
| 6 | Minhang | 1 | 4066 | 24 | 2 | 1 | 1 |  |
| 6 | Minhang | 1 | 4067 | 39 | 2 | 1 | 1 |  |
| 6 | Minhang | 1 | 4068 | 26 | 2 | 1 | 1 |  |
| 6 | Minhang | 1 | 4069 | 35 | 2 | 1 | 1 |  |
| 6 | Minhang | 1 | 4070 | 29 | 2 | 1 | 1 |  |
| 6 | Minhang | 1 | 4071 | 51 | 2 | 1 | 1 |  |

|   |         |   |      |    |   |   |   |   |
|---|---------|---|------|----|---|---|---|---|
| 6 | Minhang | 1 | 4072 | 27 | 2 | 1 | 1 |   |
| 6 | Minhang | 1 | 4073 | 32 | 2 | 1 | 1 |   |
| 6 | Minhang | 1 | 4074 | 18 | 2 | 1 | 1 |   |
| 6 | Minhang | 1 | 4075 | 6  | 1 | 1 | 1 |   |
| 6 | Minhang | 1 | 4076 | 57 | 2 | 2 | 1 |   |
| 6 | Minhang | 1 | 4077 | 62 | 2 | 1 | 1 |   |
| 6 | Minhang | 1 | 4078 | 24 | 2 | 1 | 1 |   |
| 6 | Minhang | 1 | 4079 | 23 | 2 | 1 | 1 |   |
| 6 | Minhang | 1 | 4080 | 25 | 2 | 2 | 1 |   |
| 6 | Minhang | 1 | 4081 | 24 | 2 | 1 | 1 |   |
| 6 | Minhang | 1 | 4082 | 62 | 2 | 2 | 1 |   |
| 6 | Minhang | 1 | 4083 | 32 | 2 | 1 | 1 |   |
| 6 | Minhang | 1 | 4084 | 26 | 2 | 1 | 1 |   |
| 6 | Minhang | 1 | 4085 | 19 | 2 | 2 | 1 |   |
| 6 | Minhang | 1 | 4086 | 66 | 3 | 2 | 1 |   |
| 6 | Minhang | 1 | 4087 | 33 | 2 | 1 | 1 |   |
| 6 | Minhang | 1 | 4088 | 28 | 2 | 1 | 1 |   |
| 6 | Minhang | 1 | 4089 | 53 | 2 | 1 | 1 |   |
| 6 | Minhang | 1 | 4090 | 41 | 2 | 1 | 1 |   |
| 6 | Minhang | 1 | 4091 | 23 | 2 | 1 | 1 |   |
| 6 | Minhang | 1 | 4092 | 60 | 2 | 1 | 1 |   |
| 6 | Minhang | 1 | 4093 | 26 | 2 | 1 | 1 |   |
| 6 | Minhang | 1 | 4094 | 22 | 2 | 1 | 1 |   |
| 6 | Minhang | 1 | 4095 | 28 | 2 | 1 | 1 |   |
| 6 | Minhang | 1 | 4096 | 51 | 2 | 2 | 1 |   |
| 6 | Minhang | 1 | 4097 | 80 | 3 | 1 | 1 |   |
| 6 | Minhang | 1 | 4098 | 29 | 2 | 2 | 1 |   |
| 6 | Minhang | 1 | 4099 | 53 | 2 | 1 | 1 |   |
| 6 | Minhang | 1 | 4100 | 21 | 2 | 1 | 1 |   |
| 6 | Minhang | 1 | 4101 | 58 | 2 | 1 | 1 |   |
| 6 | Minhang | 1 | 4102 | 19 | 2 | 1 | 1 |   |
| 6 | Minhang | 1 | 4103 | 43 | 2 | 1 | 1 |   |
| 6 | Minhang | 1 | 4104 | 27 | 2 | 1 | 1 |   |
| 6 | Minhang | 1 | 4105 | 52 | 2 | 1 | 1 |   |
| 6 | Minhang | 1 | 4106 | 31 | 2 | 2 | 1 |   |
| 6 | Minhang | 1 | 4107 | 44 | 2 | 2 | 1 |   |
| 6 | Minhang | 1 | 4108 | 26 | 2 | 2 | 1 |   |
| 6 | Minhang | 1 | 4109 | 25 | 2 | 1 | 1 |   |
| 6 | Minhang | 1 | 4110 | 29 | 2 | 2 | 1 |   |
| 6 | Minhang | 1 | 4111 | 62 | 2 | 2 | 1 |   |
| 6 | Minhang | 1 | 4112 | 80 | 3 | 2 | 1 |   |
| 6 | Minhang | 1 | 4113 | 27 | 2 | 2 | 1 |   |
| 6 | Minhang | 1 | 4114 | 33 | 2 | 1 | 1 | 1 |
| 6 | Minhang | 1 | 4115 | 35 | 2 | 1 | 1 |   |
| 6 | Minhang | 1 | 4116 | 19 | 2 | 2 | 1 |   |
| 6 | Minhang | 1 | 4117 | 25 | 2 | 2 | 1 | 1 |
| 6 | Minhang | 1 | 4118 | 27 | 2 | 1 | 1 |   |
| 6 | Minhang | 1 | 4119 | 24 | 2 | 1 | 1 |   |
| 6 | Minhang | 1 | 4120 | 23 | 2 | 1 | 1 |   |
| 6 | Minhang | 1 | 4121 | 48 | 2 | 2 | 1 |   |
| 6 | Minhang | 1 | 4122 | 33 | 2 | 1 | 1 |   |
| 6 | Minhang | 1 | 4123 | 53 | 2 | 1 | 1 |   |
| 6 | Minhang | 1 | 4124 | 38 | 2 | 1 | 1 |   |
| 6 | Minhang | 1 | 4125 | 42 | 2 | 1 | 1 |   |

|   |         |   |      |    |   |   |   |   |
|---|---------|---|------|----|---|---|---|---|
| 6 | Minhang | 1 | 4126 | 23 | 2 | 1 | 1 |   |
| 6 | Minhang | 1 | 4127 | 27 | 2 | 1 | 1 | 1 |
| 6 | Minhang | 1 | 4128 | 74 | 3 | 1 | 1 |   |
| 6 | Minhang | 1 | 4129 | 60 | 2 | 2 | 1 |   |
| 6 | Minhang | 1 | 4130 | 21 | 2 | 2 | 1 |   |
| 6 | Minhang | 1 | 4131 | 22 | 2 | 1 | 1 |   |
| 6 | Minhang | 1 | 4132 | 52 | 2 | 2 | 1 |   |
| 6 | Minhang | 1 | 4133 | 27 | 2 | 1 | 1 |   |
| 6 | Minhang | 1 | 4134 | 28 | 2 | 2 | 1 |   |
| 6 | Minhang | 1 | 4135 | 27 | 2 | 1 | 1 |   |
| 6 | Minhang | 1 | 4136 | 27 | 2 | 2 | 1 |   |
| 6 | Minhang | 1 | 4137 | 51 | 2 | 2 | 1 |   |
| 6 | Minhang | 1 | 4138 | 66 | 3 | 1 | 1 |   |
| 6 | Minhang | 1 | 4139 | 27 | 2 | 2 | 1 |   |
| 6 | Minhang | 1 | 4140 | 43 | 2 | 1 | 1 |   |
| 6 | Minhang | 1 | 4141 | 65 | 3 | 1 | 1 |   |
| 6 | Minhang | 1 | 4142 | 31 | 2 | 1 | 1 |   |
| 6 | Minhang | 1 | 4143 | 23 | 2 | 1 | 1 |   |
| 6 | Minhang | 1 | 4144 | 35 | 2 | 2 | 1 |   |
| 6 | Minhang | 1 | 4145 | 51 | 2 | 1 | 1 |   |
| 6 | Minhang | 1 | 4146 | 26 | 2 | 1 | 1 |   |
| 6 | Minhang | 1 | 4147 | 42 | 2 | 1 | 1 |   |
| 6 | Minhang | 1 | 4148 | 21 | 2 | 2 | 1 |   |
| 6 | Minhang | 1 | 4149 | 25 | 2 | 1 | 1 |   |
| 6 | Minhang | 1 | 4150 | 45 | 2 | 1 | 1 |   |
| 6 | Minhang | 1 | 4151 | 20 | 2 | 1 | 1 |   |
| 6 | Minhang | 1 | 4152 | 24 | 2 | 1 | 1 |   |
| 6 | Minhang | 1 | 4153 | 34 | 2 | 1 | 1 |   |
| 6 | Minhang | 1 | 4154 | 55 | 2 | 1 | 1 |   |
| 6 | Minhang | 1 | 4155 | 26 | 2 | 1 | 1 |   |
| 6 | Minhang | 1 | 4156 | 19 | 2 | 1 | 1 |   |
| 6 | Minhang | 1 | 4157 | 23 | 2 | 1 | 1 |   |
| 6 | Minhang | 1 | 4158 | 80 | 3 | 1 | 1 |   |
| 6 | Minhang | 1 | 4159 | 36 | 2 | 1 | 1 |   |
| 6 | Minhang | 1 | 4160 | 41 | 2 | 1 | 1 |   |
| 6 | Minhang | 1 | 4161 | 23 | 2 | 2 | 1 |   |
| 6 | Minhang | 1 | 4162 | 22 | 2 | 2 | 1 |   |
| 6 | Minhang | 1 | 4163 | 43 | 2 | 1 | 1 | 1 |
| 6 | Minhang | 1 | 4164 | 36 | 2 | 2 | 1 | 1 |
| 6 | Minhang | 1 | 4165 | 1  | 1 | 1 | 1 |   |
| 6 | Minhang | 1 | 4166 | 55 | 2 | 1 | 1 |   |
| 6 | Minhang | 1 | 4167 | 10 | 1 | 1 | 1 |   |
| 6 | Minhang | 1 | 4168 | 55 | 2 | 1 | 1 |   |
| 6 | Minhang | 1 | 4169 | 26 | 2 | 1 | 1 |   |
| 6 | Minhang | 1 | 4170 | 23 | 2 | 2 | 1 |   |
| 6 | Minhang | 1 | 4171 | 44 | 2 | 2 | 1 |   |
| 6 | Minhang | 1 | 4172 | 57 | 2 | 1 | 1 | 1 |
| 6 | Minhang | 1 | 4173 | 46 | 2 | 1 | 1 |   |
| 6 | Minhang | 1 | 4174 | 22 | 2 | 2 | 1 |   |
| 6 | Minhang | 1 | 4175 | 20 | 2 | 2 | 1 |   |
| 6 | Minhang | 1 | 4176 | 40 | 2 | 1 | 1 |   |
| 6 | Minhang | 1 | 4177 | 78 | 3 | 1 | 1 |   |
| 6 | Minhang | 1 | 4178 | 24 | 2 | 2 | 1 |   |
| 6 | Minhang | 1 | 4179 | 52 | 2 | 1 | 1 |   |

|   |         |   |      |    |   |   |   |   |
|---|---------|---|------|----|---|---|---|---|
| 6 | Minhang | 1 | 4180 | 20 | 2 | 1 | 1 |   |
| 6 | Minhang | 1 | 4181 | 25 | 2 | 2 | 1 |   |
| 6 | Minhang | 1 | 4182 | 63 | 2 | 1 | 1 |   |
| 6 | Minhang | 1 | 4183 | 63 | 2 | 1 | 1 |   |
| 6 | Minhang | 1 | 4184 | 21 | 2 | 2 | 1 |   |
| 6 | Minhang | 1 | 4185 | 45 | 2 | 2 | 1 |   |
| 6 | Minhang | 1 | 4186 | 16 | 2 | 1 | 1 |   |
| 6 | Minhang | 1 | 4187 | 27 | 2 | 1 | 1 |   |
| 6 | Minhang | 1 | 4188 | 38 | 2 | 1 | 1 |   |
| 6 | Minhang | 1 | 4189 | 32 | 2 | 2 | 1 |   |
| 6 | Minhang | 1 | 4190 | 45 | 2 | 2 | 1 | 1 |
| 6 | Minhang | 1 | 4191 | 39 | 2 | 2 | 1 |   |
| 6 | Minhang | 1 | 4192 | 42 | 2 | 1 | 1 | 1 |
| 6 | Minhang | 1 | 4193 | 84 | 3 | 1 | 1 |   |
| 6 | Minhang | 1 | 4194 | 22 | 2 | 1 | 1 |   |
| 6 | Minhang | 1 | 4195 | 20 | 2 | 2 | 1 |   |
| 6 | Minhang | 1 | 4196 | 38 | 2 | 2 | 1 |   |
| 6 | Minhang | 1 | 4197 | 60 | 2 | 2 | 1 |   |
| 6 | Minhang | 1 | 4198 | 29 | 2 | 1 | 1 |   |
| 6 | Minhang | 1 | 4199 | 58 | 2 | 1 | 1 |   |
| 6 | Minhang | 1 | 4200 | 40 | 2 | 1 | 1 | 1 |
| 6 | Minhang | 1 | 4201 | 20 | 2 | 1 | 1 |   |
| 6 | Minhang | 1 | 4202 | 32 | 2 | 1 | 1 | 1 |
| 6 | Minhang | 1 | 4203 | 62 | 2 | 1 | 1 | 1 |
| 6 | Minhang | 1 | 4204 | 43 | 2 | 1 | 1 | 1 |
| 6 | Minhang | 1 | 4205 | 24 | 2 | 1 | 1 |   |
| 6 | Minhang | 1 | 4206 | 24 | 2 | 1 | 1 |   |
| 6 | Minhang | 1 | 4207 | 21 | 2 | 1 | 1 |   |
| 6 | Minhang | 1 | 4208 | 40 | 2 | 1 | 1 | 1 |
| 6 | Minhang | 1 | 4209 | 24 | 2 | 1 | 1 |   |
| 6 | Minhang | 1 | 4210 | 47 | 2 | 1 | 1 |   |
| 6 | Minhang | 1 | 4211 | 19 | 2 | 2 | 1 |   |
| 6 | Minhang | 1 | 4212 | 36 | 2 | 1 | 1 | 1 |
| 6 | Minhang | 1 | 4213 | 28 | 2 | 1 | 1 |   |
| 6 | Minhang | 1 | 4214 | 33 | 2 | 1 | 1 |   |
| 6 | Minhang | 1 | 4215 | 40 | 2 | 1 | 1 |   |
| 6 | Minhang | 1 | 4216 | 41 | 2 | 1 | 1 | 1 |
| 6 | Minhang | 1 | 4217 | 29 | 2 | 1 | 1 | 1 |
| 6 | Minhang | 1 | 4218 | 25 | 2 | 1 | 1 |   |
| 6 | Minhang | 1 | 4219 | 35 | 2 | 1 | 1 |   |
| 6 | Minhang | 1 | 4220 | 38 | 2 | 1 | 1 | 1 |
| 6 | Minhang | 1 | 4221 | 66 | 3 | 2 | 1 |   |
| 6 | Minhang | 1 | 4222 | 21 | 2 | 1 | 1 |   |
| 6 | Minhang | 1 | 4223 | 22 | 2 | 1 | 1 |   |
| 6 | Minhang | 1 | 4224 | 53 | 2 | 1 | 1 |   |
| 6 | Minhang | 1 | 4225 | 21 | 2 | 1 | 1 | 1 |
| 6 | Minhang | 1 | 4226 | 39 | 2 | 1 | 1 |   |
| 6 | Minhang | 1 | 4227 | 27 | 2 | 1 | 1 |   |
| 6 | Minhang | 1 | 4228 | 28 | 2 | 1 | 1 |   |
| 6 | Minhang | 1 | 4229 | 70 | 3 | 1 | 1 |   |
| 6 | Minhang | 1 | 4230 | 25 | 2 | 1 | 1 |   |
| 6 | Minhang | 1 | 4231 | 34 | 2 | 1 | 1 |   |
| 6 | Minhang | 1 | 4232 | 23 | 2 | 1 | 1 |   |
| 6 | Minhang | 1 | 4233 | 29 | 2 | 1 | 1 |   |

|   |         |   |      |    |   |   |   |   |
|---|---------|---|------|----|---|---|---|---|
| 6 | Minhang | 1 | 4234 | 42 | 2 | 1 | 1 |   |
| 6 | Minhang | 1 | 4235 | 43 | 2 | 2 | 1 |   |
| 6 | Minhang | 1 | 4236 | 22 | 2 | 1 | 1 | 1 |
| 6 | Minhang | 1 | 4237 | 28 | 2 | 1 | 1 | 1 |
| 6 | Minhang | 1 | 4238 | 68 | 3 | 1 | 1 |   |
| 6 | Minhang | 1 | 4239 | 64 | 2 | 2 | 1 | 1 |
| 6 | Minhang | 1 | 4240 | 80 | 3 | 1 | 1 |   |
| 6 | Minhang | 1 | 4241 | 31 | 2 | 1 | 1 |   |
| 6 | Minhang | 1 | 4242 | 67 | 3 | 2 | 1 | 1 |
| 6 | Minhang | 1 | 4243 | 53 | 2 | 1 | 1 |   |
| 6 | Minhang | 1 | 4244 | 58 | 2 | 2 | 1 |   |
| 6 | Minhang | 1 | 4245 | 28 | 2 | 2 | 1 |   |
| 6 | Minhang | 1 | 4246 | 30 | 2 | 1 | 1 |   |
| 6 | Minhang | 1 | 4247 | 86 | 3 | 1 | 1 |   |
| 6 | Minhang | 1 | 4248 | 25 | 2 | 2 | 1 |   |
| 6 | Minhang | 1 | 4249 | 52 | 2 | 1 | 1 |   |
| 6 | Minhang | 1 | 4250 | 32 | 2 | 1 | 1 |   |
| 6 | Minhang | 1 | 4251 | 57 | 2 | 1 | 1 |   |
| 6 | Minhang | 1 | 4252 | 38 | 2 | 1 | 1 |   |
| 6 | Minhang | 1 | 4253 | 21 | 2 | 1 | 1 |   |
| 6 | Minhang | 1 | 4254 | 32 | 2 | 1 | 1 |   |
| 6 | Minhang | 1 | 4255 | 21 | 2 | 1 | 1 |   |
| 6 | Minhang | 1 | 4256 | 52 | 2 | 2 | 1 |   |
| 6 | Minhang | 1 | 4257 | 20 | 2 | 1 | 1 |   |
| 6 | Minhang | 1 | 4258 | 28 | 2 | 2 | 1 |   |
| 6 | Minhang | 1 | 4259 | 33 | 2 | 1 | 1 |   |
| 6 | Minhang | 1 | 4260 | 76 | 3 | 1 | 1 |   |
| 6 | Minhang | 1 | 4261 | 78 | 3 | 2 | 1 |   |
| 6 | Minhang | 1 | 4262 | 27 | 2 | 2 | 1 |   |
| 6 | Minhang | 1 | 4263 | 36 | 2 | 1 | 1 |   |
| 6 | Minhang | 1 | 4264 | 27 | 2 | 1 | 1 |   |
| 6 | Minhang | 1 | 4265 | 39 | 2 | 2 | 1 |   |
| 6 | Minhang | 1 | 4266 | 24 | 2 | 1 | 1 |   |
| 6 | Minhang | 1 | 4267 | 21 | 2 | 1 | 1 |   |
| 6 | Minhang | 1 | 4268 | 50 | 2 | 1 | 1 | 1 |
| 6 | Minhang | 1 | 4269 | 30 | 2 | 1 | 1 |   |
| 6 | Minhang | 1 | 4270 | 27 | 2 | 2 | 1 |   |
| 6 | Minhang | 1 | 4271 | 28 | 2 | 1 | 1 |   |
| 6 | Minhang | 1 | 4272 | 80 | 3 | 2 | 1 |   |
| 6 | Minhang | 1 | 4273 | 49 | 2 | 1 | 1 |   |
| 6 | Minhang | 1 | 4274 | 70 | 3 | 1 | 1 |   |
| 6 | Minhang | 1 | 4275 | 21 | 2 | 1 | 1 |   |
| 6 | Minhang | 1 | 4276 | 31 | 2 | 1 | 1 | 1 |
| 6 | Minhang | 1 | 4277 | 25 | 2 | 1 | 1 |   |
| 6 | Minhang | 1 | 4278 | 24 | 2 | 1 | 1 |   |
| 6 | Minhang | 1 | 4279 | 24 | 2 | 1 | 1 |   |
| 6 | Minhang | 1 | 4280 | 28 | 2 | 2 | 1 |   |
| 6 | Minhang | 1 | 4281 | 47 | 2 | 1 | 1 |   |
| 6 | Minhang | 1 | 4282 | 23 | 2 | 2 | 1 |   |
| 6 | Minhang | 1 | 4283 | 33 | 2 | 1 | 1 | 1 |
| 6 | Minhang | 1 | 4284 | 42 | 2 | 1 | 1 | 1 |
| 6 | Minhang | 1 | 4285 | 61 | 2 | 2 | 1 |   |
| 6 | Minhang | 1 | 4286 | 46 | 2 | 2 | 1 | 1 |
| 6 | Minhang | 1 | 4287 | 27 | 2 | 1 | 1 |   |



|   |          |   |      |    |   |   |   |   |
|---|----------|---|------|----|---|---|---|---|
| 7 | Jiangyou | 3 | 4288 | 59 | 2 | 2 |   | 1 |
| 7 | Jiangyou | 3 | 4289 | 24 | 2 | 2 |   | 1 |
| 7 | Jiangyou | 3 | 4290 | 68 | 3 | 1 | 1 | 1 |
| 7 | Jiangyou | 3 | 4291 | 63 | 2 | 1 | 1 | 1 |
| 7 | Jiangyou | 3 | 4292 | 36 | 2 | 2 | 1 |   |
| 7 | Jiangyou | 3 | 4293 | 51 | 2 | 1 | 1 | 1 |
| 7 | Jiangyou | 3 | 4294 | 48 | 2 | 1 | 1 | 1 |
| 7 | Jiangyou | 3 | 4295 | 70 | 3 | 1 | 1 |   |
| 7 | Jiangyou | 3 | 4296 | 74 | 3 | 1 | 1 | 1 |
| 7 | Jiangyou | 3 | 4297 | 70 | 3 | 1 | 1 | 1 |
| 7 | Jiangyou | 3 | 4298 | 77 | 3 | 2 | 1 |   |
| 7 | Jiangyou | 3 | 4299 | 19 | 2 | 2 | 1 | 1 |
| 7 | Jiangyou | 3 | 4300 | 0  | 1 | 1 |   | 1 |
| 7 | Jiangyou | 3 | 4301 | 0  | 1 | 1 |   | 1 |
| 7 | Jiangyou | 3 | 4302 | 41 | 2 | 2 |   | 1 |
| 7 | Jiangyou | 3 | 4303 | 48 | 2 | 1 |   | 1 |
| 7 | Jiangyou | 3 | 4304 | 70 | 3 | 1 |   | 1 |
| 7 | Jiangyou | 3 | 4305 | 0  | 1 | 1 |   | 1 |
| 7 | Jiangyou | 3 | 4306 | 45 | 2 | 1 |   | 1 |
| 7 | Jiangyou | 3 | 4307 | 59 | 2 | 1 |   | 1 |
| 7 | Jiangyou | 3 | 4308 | 85 | 3 | 1 |   | 1 |
| 7 | Jiangyou | 3 | 4309 | 62 | 2 | 1 |   | 1 |
| 7 | Jiangyou | 3 | 4310 | 70 | 3 | 1 |   | 1 |
| 7 | Jiangyou | 3 | 4311 | 22 | 2 | 1 | 1 |   |
| 7 | Jiangyou | 3 | 4312 | 84 | 3 | 1 | 1 |   |
| 7 | Jiangyou | 3 | 4313 | 20 | 2 | 1 | 1 |   |
| 7 | Jiangyou | 3 | 4314 | 32 | 2 | 1 | 1 |   |
| 7 | Jiangyou | 3 | 4315 | 30 | 2 | 1 | 1 |   |
| 7 | Jiangyou | 3 | 4316 | 59 | 2 | 1 | 1 | 1 |
| 7 | Jiangyou | 3 | 4317 | 52 | 2 | 1 | 1 |   |
| 7 | Jiangyou | 3 | 4318 | 70 | 3 | 1 | 1 | 1 |
| 7 | Jiangyou | 3 | 4319 | 60 | 2 | 1 | 1 | 1 |
| 7 | Jiangyou | 3 | 4320 | 71 | 3 | 2 | 1 |   |
| 7 | Jiangyou | 3 | 4321 | 47 | 2 | 1 | 1 | 1 |
| 7 | Jiangyou | 3 | 4322 | 61 | 2 | 1 |   | 1 |
| 7 | Jiangyou | 3 | 4323 | 75 | 3 | 1 | 1 | 1 |
| 7 | Jiangyou | 3 | 4324 | 47 | 2 | 2 | 1 | 1 |
| 7 | Jiangyou | 3 | 4325 | 28 | 2 | 1 | 1 |   |
| 7 | Jiangyou | 3 | 4326 | 47 | 2 | 1 | 1 |   |
| 7 | Jiangyou | 3 | 4327 | 34 | 2 | 1 | 1 | 1 |
| 7 | Jiangyou | 3 | 4328 | 48 | 2 | 2 |   | 1 |
| 7 | Jiangyou | 3 | 4329 | 30 | 2 | 2 | 1 |   |
| 7 | Jiangyou | 3 | 4330 | 19 | 2 | 2 | 1 | 1 |
| 7 | Jiangyou | 3 | 4331 | 37 | 2 | 1 | 1 |   |
| 7 | Jiangyou | 3 | 4332 | 69 | 3 | 1 | 1 | 1 |
| 7 | Jiangyou | 3 | 4333 | 46 | 2 | 1 | 1 | 1 |
| 7 | Jiangyou | 3 | 4334 | 60 | 2 | 1 | 1 |   |
| 7 | Jiangyou | 3 | 4335 | 28 | 2 | 1 |   | 1 |
| 7 | Jiangyou | 3 | 4336 | 41 | 2 | 1 | 1 |   |
| 7 | Jiangyou | 3 | 4337 | 66 | 3 | 2 |   | 1 |
| 7 | Jiangyou | 3 | 4338 | 81 | 3 | 1 | 1 |   |
| 7 | Jiangyou | 3 | 4339 | 69 | 3 | 1 | 1 | 1 |
| 7 | Jiangyou | 3 | 4340 | 78 | 3 | 1 | 1 | 1 |
| 7 | Jiangyou | 3 | 4341 | 84 | 3 | 1 | 1 | 1 |

|   |          |   |      |    |   |   |   |   |
|---|----------|---|------|----|---|---|---|---|
| 7 | Jiangyou | 3 | 4342 | 40 | 2 | 1 | 1 | 1 |
| 7 | Jiangyou | 3 | 4343 | 44 | 2 | 1 | 1 | 1 |
| 7 | Jiangyou | 3 | 4344 | 22 | 2 | 1 | 1 |   |
| 7 | Jiangyou | 3 | 4345 | 40 | 2 | 2 | 1 | 1 |
| 7 | Jiangyou | 3 | 4346 | 23 | 2 | 1 | 1 |   |
| 7 | Jiangyou | 3 | 4347 | 46 | 2 | 1 | 1 | 1 |
| 7 | Jiangyou | 3 | 4348 | 81 | 3 | 2 | 1 | 1 |
| 7 | Jiangyou | 3 | 4349 | 62 | 2 | 1 |   | 1 |
| 7 | Jiangyou | 3 | 4350 | 51 | 2 | 1 |   | 1 |
| 7 | Jiangyou | 3 | 4351 | 52 | 2 | 2 | 1 |   |
| 7 | Jiangyou | 3 | 4352 | 0  | 1 | 2 | 1 |   |
| 7 | Jiangyou | 3 | 4353 | 71 | 3 | 2 | 1 |   |
| 7 | Jiangyou | 3 | 4354 | 38 | 2 | 2 |   | 1 |
| 7 | Jiangyou | 3 | 4355 | 45 | 2 | 2 |   | 1 |
| 7 | Jiangyou | 3 | 4356 | 80 | 3 | 1 | 1 |   |
| 7 | Jiangyou | 3 | 4357 | 44 | 2 | 2 | 1 | 1 |
| 7 | Jiangyou | 3 | 4358 | 67 | 3 | 1 |   | 1 |
| 7 | Jiangyou | 3 | 4359 | 75 | 3 | 1 | 1 |   |
| 7 | Jiangyou | 3 | 4360 | 70 | 3 | 2 |   | 1 |
| 7 | Jiangyou | 3 | 4361 | 52 | 2 | 2 |   | 1 |
| 7 | Jiangyou | 3 | 4362 | 56 | 2 | 1 |   | 1 |
| 7 | Jiangyou | 3 | 4363 | 45 | 2 | 1 | 1 | 1 |
| 7 | Jiangyou | 3 | 4364 | 23 | 2 | 2 |   | 1 |
| 7 | Jiangyou | 3 | 4365 | 45 | 2 | 1 |   | 1 |
| 7 | Jiangyou | 3 | 4366 | 59 | 2 | 1 | 1 | 1 |
| 7 | Jiangyou | 3 | 4367 | 61 | 2 | 1 | 1 |   |
| 7 | Jiangyou | 3 | 4368 | 73 | 3 | 2 |   | 1 |
| 7 | Jiangyou | 3 | 4369 | 42 | 2 | 1 |   | 1 |
| 7 | Jiangyou | 3 | 4370 | 41 | 2 | 1 |   | 1 |
| 7 | Jiangyou | 3 | 4371 | 50 | 2 | 1 |   | 1 |
| 7 | Jiangyou | 3 | 4372 | 71 | 3 | 2 |   | 1 |
| 7 | Jiangyou | 3 | 4373 | 39 | 2 | 1 |   | 1 |
| 7 | Jiangyou | 3 | 4374 | 52 | 2 | 1 | 1 |   |
| 7 | Jiangyou | 3 | 4375 | 76 | 3 | 1 | 1 | 1 |
| 7 | Jiangyou | 3 | 4376 | 42 | 2 | 1 | 1 | 1 |
| 7 | Jiangyou | 3 | 4377 | 22 | 2 | 2 | 1 | 1 |
| 7 | Jiangyou | 3 | 4378 | 20 | 2 | 2 |   | 1 |
| 7 | Jiangyou | 3 | 4379 | 54 | 2 | 1 | 1 | 1 |
| 7 | Jiangyou | 3 | 4380 | 39 | 2 | 2 |   | 1 |
| 7 | Jiangyou | 3 | 4381 | 73 | 3 | 2 | 1 | 1 |
| 7 | Jiangyou | 3 | 4382 | 76 | 3 | 1 | 1 |   |
| 7 | Jiangyou | 3 | 4383 | 72 | 3 | 2 | 1 | 1 |
| 7 | Jiangyou | 3 | 4384 | 41 | 2 | 1 | 1 | 1 |
| 7 | Jiangyou | 3 | 4385 | 22 | 2 | 1 | 1 | 1 |
| 7 | Jiangyou | 3 | 4386 | 70 | 3 | 2 | 1 | 1 |
| 7 | Jiangyou | 3 | 4387 | 75 | 3 | 2 | 1 | 1 |
| 7 | Jiangyou | 3 | 4388 | 66 | 3 | 1 | 1 | 1 |
| 7 | Jiangyou | 3 | 4389 | 22 | 2 | 1 | 1 | 1 |
| 7 | Jiangyou | 3 | 4390 | 19 | 2 | 1 | 1 | 1 |
| 7 | Jiangyou | 3 | 4391 | 36 | 2 | 1 | 1 | 1 |
| 7 | Jiangyou | 3 | 4392 | 29 | 2 | 1 | 1 | 1 |
| 7 | Jiangyou | 3 | 4393 | 48 | 2 | 1 | 1 | 1 |
| 7 | Jiangyou | 3 | 4394 | 71 | 3 | 1 | 1 |   |
| 7 | Jiangyou | 3 | 4395 | 29 | 2 | 1 | 1 |   |

|   |          |   |      |    |   |   |   |   |
|---|----------|---|------|----|---|---|---|---|
| 7 | Jiangyou | 3 | 4396 | 32 | 2 | 1 | 1 | 1 |
| 7 | Jiangyou | 3 | 4397 | 51 | 2 | 1 | 1 | 1 |
| 7 | Jiangyou | 3 | 4398 | 47 | 2 | 2 | 1 |   |
| 7 | Jiangyou | 3 | 4399 | 51 | 2 | 1 |   | 1 |
| 7 | Jiangyou | 3 | 4400 | 18 | 2 | 2 |   | 1 |
| 7 | Jiangyou | 3 | 4401 | 21 | 2 | 1 | 1 | 1 |
| 7 | Jiangyou | 3 | 4402 | 20 | 2 | 1 | 1 |   |
| 7 | Jiangyou | 3 | 4403 | 59 | 2 | 1 | 1 |   |
| 7 | Jiangyou | 3 | 4404 | 30 | 2 | 2 | 1 | 1 |
| 7 | Jiangyou | 3 | 4405 | 30 | 2 | 2 | 1 |   |
| 7 | Jiangyou | 3 | 4406 | 81 | 3 | 1 | 1 | 1 |
| 7 | Jiangyou | 3 | 4407 | 76 | 3 | 2 | 1 | 1 |
| 7 | Jiangyou | 3 | 4408 | 57 | 2 | 1 | 1 |   |
| 7 | Jiangyou | 3 | 4409 | 66 | 3 | 1 |   | 1 |
| 7 | Jiangyou | 3 | 4410 | 65 | 3 | 1 |   | 1 |
| 7 | Jiangyou | 3 | 4411 | 63 | 2 | 1 | 1 |   |
| 7 | Jiangyou | 3 | 4412 | 27 | 2 | 2 | 1 |   |
| 7 | Jiangyou | 3 | 4413 | 64 | 2 | 1 |   | 1 |
| 7 | Jiangyou | 3 | 4414 | 62 | 2 | 1 | 1 | 1 |
| 7 | Jiangyou | 3 | 4415 | 38 | 2 | 2 |   | 1 |
| 7 | Jiangyou | 3 | 4416 | 39 | 2 | 1 | 1 | 1 |
| 7 | Jiangyou | 3 | 4417 | 22 | 2 | 1 | 1 | 1 |
| 7 | Jiangyou | 3 | 4418 | 51 | 2 | 2 | 1 | 1 |
| 7 | Jiangyou | 3 | 4419 | 28 | 2 | 1 | 1 | 1 |
| 7 | Jiangyou | 3 | 4420 | 35 | 2 | 2 | 1 | 1 |
| 7 | Jiangyou | 3 | 4421 | 23 | 2 | 1 |   | 1 |
| 7 | Jiangyou | 3 | 4422 | 41 | 2 | 2 | 1 | 1 |
| 7 | Jiangyou | 3 | 4423 | 41 | 2 | 1 | 1 | 1 |
| 7 | Jiangyou | 3 | 4424 | 58 | 2 | 1 |   | 1 |
| 7 | Jiangyou | 3 | 4425 | 72 | 3 | 2 |   | 1 |
| 7 | Jiangyou | 3 | 4426 | 40 | 2 | 1 |   | 1 |
| 7 | Jiangyou | 3 | 4427 | 25 | 2 | 2 | 1 | 1 |
| 7 | Jiangyou | 3 | 4428 | 20 | 2 | 2 | 1 |   |
| 7 | Jiangyou | 3 | 4429 | 23 | 2 | 2 | 1 |   |
| 7 | Jiangyou | 3 | 4430 | 69 | 3 | 1 |   | 1 |
| 7 | Jiangyou | 3 | 4431 | 51 | 2 | 1 | 1 |   |
| 7 | Jiangyou | 3 | 4432 | 40 | 2 | 2 | 1 |   |
| 7 | Jiangyou | 3 | 4433 | 0  | 1 | 1 | 1 |   |
| 7 | Jiangyou | 3 | 4434 | 45 | 2 | 2 | 1 |   |
| 7 | Jiangyou | 3 | 4435 | 0  | 1 | 1 | 1 |   |
| 7 | Jiangyou | 3 | 4436 | 65 | 3 | 1 | 1 | 1 |
| 7 | Jiangyou | 3 | 4437 | 50 | 2 | 2 | 1 | 1 |
| 7 | Jiangyou | 3 | 4438 | 83 | 3 | 2 | 1 | 1 |
| 7 | Jiangyou | 3 | 4439 | 50 | 2 | 1 | 1 | 1 |
| 7 | Jiangyou | 3 | 4440 | 62 | 2 | 1 | 1 | 1 |
| 7 | Jiangyou | 3 | 4441 | 39 | 2 | 1 | 1 |   |
| 7 | Jiangyou | 3 | 4442 | 0  | 1 | 1 | 1 |   |
| 7 | Jiangyou | 3 | 4443 | 63 | 2 | 1 | 1 |   |
| 7 | Jiangyou | 3 | 4444 | 66 | 3 | 1 |   | 1 |
| 7 | Jiangyou | 3 | 4445 | 18 | 2 | 1 |   | 1 |
| 7 | Jiangyou | 3 | 4446 | 33 | 2 | 1 |   | 1 |
| 7 | Jiangyou | 3 | 4447 | 50 | 2 | 1 | 1 | 1 |
| 7 | Jiangyou | 3 | 4448 | 74 | 3 | 1 | 1 | 1 |
| 7 | Jiangyou | 3 | 4449 | 43 | 2 | 1 |   | 1 |

|   |          |   |      |    |   |   |   |   |
|---|----------|---|------|----|---|---|---|---|
| 7 | Jiangyou | 3 | 4450 | 51 | 2 | 1 | 1 | 1 |
| 7 | Jiangyou | 3 | 4451 | 43 | 2 | 1 | 1 |   |
| 7 | Jiangyou | 3 | 4452 | 45 | 2 | 1 | 1 | 1 |
| 7 | Jiangyou | 3 | 4453 | 53 | 2 | 2 | 1 | 1 |
| 7 | Jiangyou | 3 | 4454 | 63 | 2 | 1 |   | 1 |
| 7 | Jiangyou | 3 | 4455 | 21 | 2 | 1 | 1 | 1 |
| 7 | Jiangyou | 3 | 4456 | 27 | 2 | 1 |   | 1 |
| 7 | Jiangyou | 3 | 4457 | 58 | 2 | 2 |   | 1 |
| 7 | Jiangyou | 3 | 4458 | 37 | 2 | 1 |   | 1 |
| 7 | Jiangyou | 3 | 4459 | 46 | 2 | 1 |   | 1 |
| 7 | Jiangyou | 3 | 4460 | 71 | 3 | 1 |   | 1 |
| 7 | Jiangyou | 3 | 4461 | 65 | 3 | 2 | 1 | 1 |
| 7 | Jiangyou | 3 | 4462 | 54 | 2 | 1 | 1 | 1 |
| 7 | Jiangyou | 3 | 4463 | 66 | 3 | 1 | 1 | 1 |
| 7 | Jiangyou | 3 | 4464 | 46 | 2 | 1 | 1 | 1 |
| 7 | Jiangyou | 3 | 4465 | 18 | 2 | 1 |   | 1 |
| 7 | Jiangyou | 3 | 4466 | 63 | 2 | 1 | 1 |   |
| 7 | Jiangyou | 3 | 4467 | 40 | 2 | 2 | 1 | 1 |
| 7 | Jiangyou | 3 | 4468 | 61 | 2 | 1 |   | 1 |
| 7 | Jiangyou | 3 | 4469 | 30 | 2 | 2 |   | 1 |
| 7 | Jiangyou | 3 | 4470 | 84 | 3 | 1 | 1 | 1 |
| 7 | Jiangyou | 3 | 4471 | 27 | 2 | 2 | 1 |   |
| 7 | Jiangyou | 3 | 4472 | 50 | 2 | 1 | 1 |   |
| 7 | Jiangyou | 3 | 4473 | 40 | 2 | 1 | 1 |   |
| 7 | Jiangyou | 3 | 4474 | 49 | 2 | 1 | 1 | 1 |
| 7 | Jiangyou | 3 | 4475 | 59 | 2 | 1 | 1 | 1 |
| 7 | Jiangyou | 3 | 4476 | 73 | 3 | 2 |   | 1 |
| 7 | Jiangyou | 3 | 4477 | 25 | 2 | 1 |   | 1 |
| 7 | Jiangyou | 3 | 4478 | 51 | 2 | 2 | 1 | 1 |
| 7 | Jiangyou | 3 | 4479 | 64 | 2 | 1 |   | 1 |
| 7 | Jiangyou | 3 | 4480 | 48 | 2 | 2 |   | 1 |
| 7 | Jiangyou | 3 | 4481 | 60 | 2 | 1 |   | 1 |
| 7 | Jiangyou | 3 | 4482 | 15 | 2 | 1 | 1 | 1 |
| 7 | Jiangyou | 3 | 4483 | 62 | 2 | 1 | 1 |   |
| 7 | Jiangyou | 3 | 4484 | 23 | 2 | 2 |   | 1 |
| 7 | Jiangyou | 3 | 4485 | 65 | 3 | 1 | 1 | 1 |
| 7 | Jiangyou | 3 | 4486 | 65 | 3 | 2 | 1 |   |
| 7 | Jiangyou | 3 | 4487 | 43 | 2 | 1 | 1 | 1 |
| 7 | Jiangyou | 3 | 4488 | 31 | 2 | 2 |   | 1 |
| 7 | Jiangyou | 3 | 4489 | 65 | 3 | 1 | 1 | 1 |
| 7 | Jiangyou | 3 | 4490 | 80 | 3 | 1 | 1 |   |
| 7 | Jiangyou | 3 | 4491 | 61 | 2 | 1 | 1 | 1 |
| 7 | Jiangyou | 3 | 4492 | 60 | 2 | 1 | 1 | 1 |
| 7 | Jiangyou | 3 | 4493 | 58 | 2 | 1 | 1 | 1 |
| 7 | Jiangyou | 3 | 4494 | 42 | 2 | 1 | 1 |   |
| 7 | Jiangyou | 3 | 4495 | 49 | 2 | 1 | 1 |   |
| 7 | Jiangyou | 3 | 4496 | 71 | 3 | 1 | 1 | 1 |
| 7 | Jiangyou | 3 | 4497 | 38 | 2 | 2 | 1 |   |
| 7 | Jiangyou | 3 | 4498 | 45 | 2 | 1 | 1 |   |
| 7 | Jiangyou | 3 | 4499 | 21 | 2 | 2 |   | 1 |
| 7 | Jiangyou | 3 | 4500 | 46 | 2 | 1 | 1 |   |
| 7 | Jiangyou | 3 | 4501 | 56 | 2 | 1 | 1 | 1 |
| 7 | Jiangyou | 3 | 4502 | 61 | 2 | 1 | 1 |   |
| 7 | Jiangyou | 3 | 4503 | 41 | 2 | 2 | 1 | 1 |

|   |          |   |      |    |   |   |   |   |
|---|----------|---|------|----|---|---|---|---|
| 7 | Jiangyou | 3 | 4504 | 48 | 2 | 1 | 1 |   |
| 7 | Jiangyou | 3 | 4505 | 76 | 3 | 1 | 1 | 1 |
| 7 | Jiangyou | 3 | 4506 | 31 | 2 | 2 | 1 | 1 |
| 7 | Jiangyou | 3 | 4507 | 19 | 2 | 1 | 1 |   |
| 7 | Jiangyou | 3 | 4508 | 84 | 3 | 1 | 1 | 1 |
| 7 | Jiangyou | 3 | 4509 | 60 | 2 | 1 | 1 |   |
| 7 | Jiangyou | 3 | 4510 | 43 | 2 | 1 | 1 | 1 |
| 7 | Jiangyou | 3 | 4511 | 36 | 2 | 2 | 1 |   |
| 7 | Jiangyou | 3 | 4512 | 50 | 2 | 1 | 1 |   |
| 7 | Jiangyou | 3 | 4513 | 37 | 2 | 1 | 1 | 1 |
| 7 | Jiangyou | 3 | 4514 | 63 | 2 | 1 | 1 | 1 |
| 7 | Jiangyou | 3 | 4515 | 62 | 2 | 1 | 1 |   |
| 7 | Jiangyou | 3 | 4516 | 71 | 3 | 1 | 1 | 1 |
| 7 | Jiangyou | 3 | 4517 | 46 | 2 | 1 | 1 | 1 |
| 7 | Jiangyou | 3 | 4518 | 44 | 2 | 1 |   | 1 |
| 7 | Jiangyou | 3 | 4519 | 64 | 2 | 1 | 1 | 1 |
| 7 | Jiangyou | 3 | 4520 | 27 | 2 | 1 | 1 | 1 |
| 7 | Jiangyou | 3 | 4521 | 49 | 2 | 1 | 1 |   |
| 7 | Jiangyou | 3 | 4522 | 72 | 3 | 1 | 1 |   |
| 7 | Jiangyou | 3 | 4523 | 67 | 3 | 2 | 1 | 1 |
| 7 | Jiangyou | 3 | 4524 | 48 | 2 | 1 | 1 | 1 |
| 7 | Jiangyou | 3 | 4525 | 61 | 2 | 1 | 1 |   |
| 7 | Jiangyou | 3 | 4526 | 55 | 2 | 1 | 1 |   |
| 7 | Jiangyou | 3 | 4527 | 42 | 2 | 2 | 1 | 1 |
| 7 | Jiangyou | 3 | 4528 | 74 | 3 | 2 | 1 | 1 |
| 7 | Jiangyou | 3 | 4529 | 24 | 2 | 1 |   | 1 |
| 7 | Jiangyou | 3 | 4530 | 17 | 2 | 1 | 1 |   |
| 7 | Jiangyou | 3 | 4531 | 59 | 2 | 1 | 1 | 1 |
| 7 | Jiangyou | 3 | 4532 | 32 | 2 | 1 | 1 | 1 |
| 7 | Jiangyou | 3 | 4533 | 19 | 2 | 1 | 1 |   |
| 7 | Jiangyou | 3 | 4534 | 21 | 2 | 2 | 1 |   |
| 7 | Jiangyou | 3 | 4535 | 42 | 2 | 1 | 1 |   |
| 7 | Jiangyou | 3 | 4536 | 28 | 2 | 1 | 1 |   |
| 7 | Jiangyou | 3 | 4537 | 15 | 2 | 1 | 1 | 1 |
| 7 | Jiangyou | 3 | 4538 | 64 | 2 | 1 | 1 |   |
| 7 | Jiangyou | 3 | 4539 | 37 | 2 | 1 | 1 | 1 |
| 7 | Jiangyou | 3 | 4540 | 41 | 2 | 2 | 1 |   |
| 7 | Jiangyou | 3 | 4541 | 41 | 2 | 1 | 1 | 1 |
| 7 | Jiangyou | 3 | 4542 | 64 | 2 | 1 | 1 | 1 |
| 7 | Jiangyou | 3 | 4543 | 48 | 2 | 2 |   | 1 |
| 7 | Jiangyou | 3 | 4544 | 37 | 2 | 2 |   | 1 |
| 7 | Jiangyou | 3 | 4545 | 42 | 2 | 2 | 1 | 1 |
| 7 | Jiangyou | 3 | 4546 | 65 | 3 | 1 | 1 | 1 |
| 7 | Jiangyou | 3 | 4547 | 50 | 2 | 1 | 1 | 1 |
| 7 | Jiangyou | 3 | 4548 | 67 | 3 | 1 | 1 | 1 |
| 7 | Jiangyou | 3 | 4549 | 17 | 2 | 1 |   | 1 |
| 7 | Jiangyou | 3 | 4550 | 81 | 3 | 1 | 1 | 1 |
| 7 | Jiangyou | 3 | 4551 | 61 | 2 | 1 | 1 | 1 |
| 7 | Jiangyou | 3 | 4552 | 31 | 2 | 1 |   | 1 |
| 7 | Jiangyou | 3 | 4553 | 60 | 2 | 1 | 1 |   |
| 7 | Jiangyou | 3 | 4554 | 39 | 2 | 1 | 1 | 1 |
| 7 | Jiangyou | 3 | 4555 | 78 | 3 | 1 |   | 1 |
| 7 | Jiangyou | 3 | 4556 | 37 | 2 | 2 | 1 |   |
| 7 | Jiangyou | 3 | 4557 | 36 | 2 | 1 | 1 |   |

|   |          |   |      |    |   |   |   |   |
|---|----------|---|------|----|---|---|---|---|
| 7 | Jiangyou | 3 | 4558 | 48 | 2 | 2 | 1 |   |
| 7 | Jiangyou | 3 | 4559 | 64 | 2 | 2 | 1 | 1 |
| 7 | Jiangyou | 3 | 4560 | 62 | 2 | 2 | 1 | 1 |
| 7 | Jiangyou | 3 | 4561 | 19 | 2 | 2 | 1 | 1 |
| 7 | Jiangyou | 3 | 4562 | 31 | 2 | 2 | 1 | 1 |
| 7 | Jiangyou | 3 | 4563 | 51 | 2 | 1 | 1 | 1 |
| 7 | Jiangyou | 3 | 4564 | 72 | 3 | 2 | 1 |   |
| 7 | Jiangyou | 3 | 4565 | 47 | 2 | 1 | 1 | 1 |
| 7 | Jiangyou | 3 | 4566 | 25 | 2 | 2 |   | 1 |
| 7 | Jiangyou | 3 | 4567 | 30 | 2 | 2 | 1 | 1 |
| 7 | Jiangyou | 3 | 4568 | 38 | 2 | 1 | 1 | 1 |
| 7 | Jiangyou | 3 | 4569 | 43 | 2 | 2 | 1 | 1 |
| 7 | Jiangyou | 3 | 4570 | 75 | 3 | 2 | 1 | 1 |
| 7 | Jiangyou | 3 | 4571 | 39 | 2 | 1 |   | 1 |
| 7 | Jiangyou | 3 | 4572 | 46 | 2 | 2 | 1 | 1 |
| 7 | Jiangyou | 3 | 4573 | 17 | 2 | 1 | 1 |   |
| 7 | Jiangyou | 3 | 4574 | 54 | 2 | 2 |   | 1 |
| 7 | Jiangyou | 3 | 4575 | 22 | 2 | 1 | 1 | 1 |
| 7 | Jiangyou | 3 | 4576 | 27 | 2 | 1 |   | 1 |
| 7 | Jiangyou | 3 | 4577 | 45 | 2 | 2 | 1 |   |
| 7 | Jiangyou | 3 | 4578 | 78 | 3 | 2 | 1 | 1 |
| 7 | Jiangyou | 3 | 4579 | 69 | 3 | 1 | 1 | 1 |
| 7 | Jiangyou | 3 | 4580 | 81 | 3 | 1 |   | 1 |
| 7 | Jiangyou | 3 | 4581 | 59 | 2 | 1 | 1 |   |
| 7 | Jiangyou | 3 | 4582 | 18 | 2 | 1 | 1 | 1 |
| 7 | Jiangyou | 3 | 4583 | 70 | 3 | 1 | 1 |   |
| 7 | Jiangyou | 3 | 4584 | 19 | 2 | 2 | 1 |   |
| 7 | Jiangyou | 3 | 4585 | 23 | 2 | 1 |   | 1 |
| 7 | Jiangyou | 3 | 4586 | 18 | 2 | 1 | 1 |   |
| 7 | Jiangyou | 3 | 4587 | 62 | 2 | 1 | 1 | 1 |
| 7 | Jiangyou | 3 | 4588 | 51 | 2 | 1 | 1 |   |
| 7 | Jiangyou | 3 | 4589 | 37 | 2 | 2 | 1 |   |
| 7 | Jiangyou | 3 | 4590 | 27 | 2 | 2 | 1 | 1 |
| 7 | Jiangyou | 3 | 4591 | 26 | 2 | 1 | 1 | 1 |
| 7 | Jiangyou | 3 | 4592 | 73 | 3 | 2 |   | 1 |
| 7 | Jiangyou | 3 | 4593 | 36 | 2 | 1 | 1 |   |
| 7 | Jiangyou | 3 | 4594 | 38 | 2 | 1 | 1 |   |
| 7 | Jiangyou | 3 | 4595 | 56 | 2 | 1 | 1 | 1 |
| 7 | Jiangyou | 3 | 4596 | 49 | 2 | 1 | 1 |   |
| 7 | Jiangyou | 3 | 4597 | 33 | 2 | 2 | 1 |   |
| 7 | Jiangyou | 3 | 4598 | 76 | 3 | 2 | 1 |   |
| 7 | Jiangyou | 3 | 4599 | 47 | 2 | 1 | 1 |   |
| 7 | Jiangyou | 3 | 4600 | 75 | 3 | 1 | 1 |   |
| 7 | Jiangyou | 3 | 4601 | 51 | 2 | 2 | 1 |   |
| 7 | Jiangyou | 3 | 4602 | 24 | 2 | 2 | 1 |   |
| 7 | Jiangyou | 3 | 4603 | 56 | 2 | 1 | 1 |   |
| 7 | Jiangyou | 3 | 4604 | 22 | 2 | 2 | 1 |   |
| 7 | Jiangyou | 3 | 4605 | 17 | 2 | 1 | 1 |   |
| 7 | Jiangyou | 3 | 4606 | 48 | 2 | 1 | 1 | 1 |
| 7 | Jiangyou | 3 | 4607 | 17 | 2 | 1 | 1 |   |
| 7 | Jiangyou | 3 | 4608 | 73 | 3 | 2 | 1 | 1 |
| 7 | Jiangyou | 3 | 4609 | 43 | 2 | 1 |   | 1 |
| 7 | Jiangyou | 3 | 4610 | 26 | 2 | 1 |   | 1 |
| 7 | Jiangyou | 3 | 4611 | 70 | 3 | 1 | 1 |   |

|   |          |   |      |    |   |   |   |   |
|---|----------|---|------|----|---|---|---|---|
| 7 | Jiangyou | 3 | 4612 | 46 | 2 | 2 | 1 | 1 |
| 7 | Jiangyou | 3 | 4613 | 42 | 2 | 1 | 1 |   |
| 7 | Jiangyou | 3 | 4614 | 47 | 2 | 2 | 1 |   |
| 7 | Jiangyou | 3 | 4615 | 61 | 2 | 1 | 1 | 1 |
| 7 | Jiangyou | 3 | 4616 | 70 | 3 | 1 | 1 | 1 |
| 7 | Jiangyou | 3 | 4617 | 31 | 2 | 1 | 1 | 1 |
| 7 | Jiangyou | 3 | 4618 | 72 | 3 | 1 | 1 | 1 |
| 7 | Jiangyou | 3 | 4619 | 30 | 2 | 2 | 1 |   |
| 7 | Jiangyou | 3 | 4620 | 73 | 3 | 1 | 1 | 1 |
| 7 | Jiangyou | 3 | 4621 | 45 | 2 | 1 | 1 | 1 |
| 7 | Jiangyou | 3 | 4622 | 83 | 3 | 2 | 1 |   |
| 7 | Jiangyou | 3 | 4623 | 58 | 2 | 1 | 1 | 1 |
| 7 | Jiangyou | 3 | 4624 | 70 | 3 | 1 | 1 |   |
| 7 | Jiangyou | 3 | 4625 | 64 | 2 | 1 | 1 | 1 |
| 7 | Jiangyou | 3 | 4626 | 19 | 2 | 2 | 1 |   |
| 7 | Jiangyou | 3 | 4627 | 75 | 3 | 1 | 1 | 1 |
| 7 | Jiangyou | 3 | 4628 | 42 | 2 | 2 | 1 | 1 |
| 7 | Jiangyou | 3 | 4629 | 57 | 2 | 1 | 1 |   |
| 7 | Jiangyou | 3 | 4630 | 84 | 3 | 1 | 1 |   |
| 7 | Jiangyou | 3 | 4631 | 46 | 2 | 1 |   | 1 |
| 7 | Jiangyou | 3 | 4632 | 40 | 2 | 1 |   | 1 |
| 7 | Jiangyou | 3 | 4633 | 52 | 2 | 2 | 1 | 1 |
| 7 | Jiangyou | 3 | 4634 | 52 | 2 | 1 |   | 1 |
| 7 | Jiangyou | 3 | 4635 | 49 | 2 | 1 |   | 1 |
| 7 | Jiangyou | 3 | 4636 | 64 | 2 | 1 |   | 1 |
| 7 | Jiangyou | 3 | 4637 | 82 | 3 | 1 | 1 | 1 |
| 7 | Jiangyou | 3 | 4638 | 71 | 3 | 1 | 1 | 1 |
| 7 | Jiangyou | 3 | 4639 | 50 | 2 | 1 | 1 |   |
| 7 | Jiangyou | 3 | 4640 | 16 | 2 | 2 | 1 | 1 |
| 7 | Jiangyou | 3 | 4641 | 63 | 2 | 1 | 1 |   |
| 7 | Jiangyou | 3 | 4642 | 31 | 2 | 2 | 1 |   |
| 7 | Jiangyou | 3 | 4643 | 63 | 2 | 2 | 1 |   |
| 7 | Jiangyou | 3 | 4644 | 57 | 2 | 1 | 1 | 1 |
| 7 | Jiangyou | 3 | 4645 | 52 | 2 | 1 | 1 | 1 |
| 7 | Jiangyou | 3 | 4646 | 31 | 2 | 2 | 1 |   |
| 7 | Jiangyou | 3 | 4647 | 62 | 2 | 1 | 1 |   |
| 7 | Jiangyou | 3 | 4648 | 25 | 2 | 1 |   | 1 |
| 7 | Jiangyou | 3 | 4649 | 67 | 3 | 1 | 1 | 1 |
| 7 | Jiangyou | 3 | 4650 | 44 | 2 | 2 | 1 | 1 |
| 7 | Jiangyou | 3 | 4651 | 34 | 2 | 1 | 1 | 1 |
| 7 | Jiangyou | 3 | 4652 | 25 | 2 | 1 | 1 | 1 |
| 7 | Jiangyou | 3 | 4653 | 43 | 2 | 1 | 1 |   |
| 7 | Jiangyou | 3 | 4654 | 22 | 2 | 1 | 1 | 1 |
| 7 | Jiangyou | 3 | 4655 | 43 | 2 | 1 |   | 1 |
| 7 | Jiangyou | 3 | 4656 | 37 | 2 | 1 | 1 | 1 |
| 7 | Jiangyou | 3 | 4657 | 57 | 2 | 1 |   | 1 |
| 7 | Jiangyou | 3 | 4658 | 40 | 2 | 1 | 1 |   |
| 7 | Jiangyou | 3 | 4659 | 79 | 3 | 1 | 1 |   |
| 7 | Jiangyou | 3 | 4660 | 40 | 2 | 1 |   | 1 |
| 7 | Jiangyou | 3 | 4661 | 61 | 2 | 1 | 1 |   |
| 7 | Jiangyou | 3 | 4662 | 58 | 2 | 1 | 1 |   |
| 7 | Jiangyou | 3 | 4663 | 41 | 2 | 1 | 1 | 1 |
| 7 | Jiangyou | 3 | 4664 | 45 | 2 | 1 |   | 1 |
| 7 | Jiangyou | 3 | 4665 | 27 | 2 | 1 | 1 |   |

|   |          |   |      |    |   |   |   |   |
|---|----------|---|------|----|---|---|---|---|
| 7 | Jiangyou | 3 | 4666 | 17 | 2 | 1 | 1 | 1 |
| 7 | Jiangyou | 3 | 4667 | 19 | 2 | 1 | 1 |   |
| 7 | Jiangyou | 3 | 4668 | 42 | 2 | 1 | 1 | 1 |
| 7 | Jiangyou | 3 | 4669 | 70 | 3 | 1 | 1 |   |
| 7 | Jiangyou | 3 | 4670 | 61 | 2 | 1 | 1 | 1 |
| 7 | Jiangyou | 3 | 4671 | 59 | 2 | 1 | 1 | 1 |
| 7 | Jiangyou | 3 | 4672 | 20 | 2 | 1 | 1 |   |
| 7 | Jiangyou | 3 | 4673 | 28 | 2 | 2 | 1 |   |
| 7 | Jiangyou | 3 | 4674 | 54 | 2 | 1 | 1 |   |
| 7 | Jiangyou | 3 | 4675 | 39 | 2 | 1 | 1 |   |
| 7 | Jiangyou | 3 | 4676 | 28 | 2 | 2 | 1 |   |
| 7 | Jiangyou | 3 | 4677 | 48 | 2 | 1 |   | 1 |
| 7 | Jiangyou | 3 | 4678 | 73 | 3 | 1 | 1 | 1 |
| 7 | Jiangyou | 3 | 4679 | 31 | 2 | 2 | 1 |   |
| 7 | Jiangyou | 3 | 4680 | 59 | 2 | 2 |   | 1 |
| 7 | Jiangyou | 3 | 4681 | 27 | 2 | 1 |   | 1 |
| 7 | Jiangyou | 3 | 4682 | 46 | 2 | 1 | 1 |   |
| 7 | Jiangyou | 3 | 4683 | 72 | 3 | 1 |   | 1 |
| 7 | Jiangyou | 3 | 4684 | 26 | 2 | 1 | 1 |   |
| 7 | Jiangyou | 3 | 4685 | 50 | 2 | 1 | 1 | 1 |
| 7 | Jiangyou | 3 | 4686 | 63 | 2 | 1 | 1 |   |
| 7 | Jiangyou | 3 | 4687 | 74 | 3 | 2 | 1 | 1 |
| 7 | Jiangyou | 3 | 4688 | 62 | 2 | 1 | 1 |   |
| 7 | Jiangyou | 3 | 4689 | 53 | 2 | 1 | 1 |   |
| 7 | Jiangyou | 3 | 4690 | 26 | 2 | 1 | 1 | 1 |
| 7 | Jiangyou | 3 | 4691 | 20 | 2 | 1 | 1 |   |
| 7 | Jiangyou | 3 | 4692 | 65 | 3 | 1 | 1 | 1 |
| 7 | Jiangyou | 3 | 4693 | 22 | 2 | 1 |   | 1 |
| 7 | Jiangyou | 3 | 4694 | 47 | 2 | 1 |   | 1 |
| 7 | Jiangyou | 3 | 4695 | 21 | 2 | 1 | 1 |   |
| 7 | Jiangyou | 3 | 4696 | 65 | 3 | 2 |   | 1 |
| 7 | Jiangyou | 3 | 4697 | 39 | 2 | 1 |   | 1 |
| 7 | Jiangyou | 3 | 4698 | 21 | 2 | 2 |   | 1 |
| 7 | Jiangyou | 3 | 4699 | 58 | 2 | 2 | 1 | 1 |
| 7 | Jiangyou | 3 | 4700 | 59 | 2 | 1 |   | 1 |
| 7 | Jiangyou | 3 | 4701 | 35 | 2 | 1 |   | 1 |
| 7 | Jiangyou | 3 | 4702 | 46 | 2 | 1 |   | 1 |
| 7 | Jiangyou | 3 | 4703 | 64 | 2 | 2 | 1 |   |
| 7 | Jiangyou | 3 | 4704 | 46 | 2 | 1 |   | 1 |
| 7 | Jiangyou | 3 | 4705 | 17 | 2 | 1 | 1 | 1 |
| 7 | Jiangyou | 3 | 4706 | 42 | 2 | 1 |   | 1 |
| 7 | Jiangyou | 3 | 4707 | 51 | 2 | 2 | 1 |   |
| 7 | Jiangyou | 3 | 4708 | 59 | 2 | 1 | 1 | 1 |
| 7 | Jiangyou | 3 | 4709 | 33 | 2 | 1 | 1 | 1 |
| 7 | Jiangyou | 3 | 4710 | 40 | 2 | 2 | 1 | 1 |
| 7 | Jiangyou | 3 | 4711 | 67 | 3 | 1 |   | 1 |
| 7 | Jiangyou | 3 | 4712 | 22 | 2 | 2 | 1 | 1 |
| 7 | Jiangyou | 3 | 4713 | 51 | 2 | 1 | 1 | 1 |
| 7 | Jiangyou | 3 | 4714 | 45 | 2 | 1 | 1 | 1 |
| 7 | Jiangyou | 3 | 4715 | 51 | 2 | 1 | 1 | 1 |
| 7 | Jiangyou | 3 | 4716 | 38 | 2 | 1 | 1 | 1 |
| 7 | Jiangyou | 3 | 4717 | 22 | 2 | 1 | 1 |   |
| 7 | Jiangyou | 3 | 4718 | 40 | 2 | 1 | 1 | 1 |
| 7 | Jiangyou | 3 | 4719 | 57 | 2 | 1 | 1 | 1 |



|   |          |   |      |    |   |   |   |   |
|---|----------|---|------|----|---|---|---|---|
| 7 | Jiangyou | 3 | 4720 | 72 | 3 | 1 | 1 | 1 |
| 7 | Jiangyou | 3 | 4721 | 45 | 2 | 1 | 1 |   |
| 7 | Jiangyou | 3 | 4722 | 65 | 3 | 1 |   | 1 |
| 7 | Jiangyou | 3 | 4723 | 25 | 2 | 1 | 1 |   |
| 7 | Jiangyou | 3 | 4724 | 39 | 2 | 2 | 1 | 1 |
| 7 | Jiangyou | 3 | 4725 | 44 | 2 | 1 | 1 | 1 |
| 7 | Jiangyou | 3 | 4726 | 75 | 3 | 1 | 1 | 1 |
| 7 | Jiangyou | 3 | 4727 | 43 | 2 | 1 | 1 |   |
| 7 | Jiangyou | 3 | 4728 | 38 | 2 | 2 | 1 | 1 |
| 7 | Jiangyou | 3 | 4729 | 29 | 2 | 1 | 1 | 1 |
| 7 | Jiangyou | 3 | 4730 | 53 | 2 | 1 | 1 | 1 |
| 7 | Jiangyou | 3 | 4731 | 53 | 2 | 1 |   | 1 |
| 7 | Jiangyou | 3 | 4732 | 81 | 3 | 2 | 1 |   |
| 7 | Jiangyou | 3 | 4733 | 47 | 2 | 1 | 1 | 1 |
| 7 | Jiangyou | 3 | 4734 | 65 | 3 | 1 | 1 | 1 |
| 7 | Jiangyou | 3 | 4735 | 50 | 2 | 1 | 1 | 1 |
| 7 | Jiangyou | 3 | 4736 | 47 | 2 | 1 |   | 1 |
| 7 | Jiangyou | 3 | 4737 | 58 | 2 | 1 | 1 |   |
| 7 | Jiangyou | 3 | 4738 | 69 | 3 | 1 | 1 | 1 |
| 7 | Jiangyou | 3 | 4739 | 24 | 2 | 1 | 1 | 1 |
| 7 | Jiangyou | 3 | 4740 | 56 | 2 | 1 | 1 | 1 |
| 7 | Jiangyou | 3 | 4741 | 69 | 3 | 2 | 1 | 1 |
| 7 | Jiangyou | 3 | 4742 | 27 | 2 | 1 | 1 |   |
| 7 | Jiangyou | 3 | 4743 | 45 | 2 | 1 |   | 1 |
| 7 | Jiangyou | 3 | 4744 | 16 | 2 | 1 | 1 | 1 |
| 7 | Jiangyou | 3 | 4745 | 44 | 2 | 2 |   | 1 |
| 7 | Jiangyou | 3 | 4746 | 45 | 2 | 1 |   | 1 |
| 7 | Jiangyou | 3 | 4747 | 25 | 2 | 1 |   | 1 |
| 7 | Jiangyou | 3 | 4748 | 24 | 2 | 2 |   | 1 |
| 7 | Jiangyou | 3 | 4749 | 43 | 2 | 1 | 1 | 1 |
| 7 | Jiangyou | 3 | 4750 | 63 | 2 | 1 | 1 |   |
| 7 | Jiangyou | 3 | 4751 | 47 | 2 | 2 | 1 |   |
| 7 | Jiangyou | 3 | 4752 | 43 | 2 | 1 |   | 1 |
| 7 | Jiangyou | 3 | 4753 | 72 | 3 | 1 | 1 |   |
| 7 | Jiangyou | 3 | 4754 | 29 | 2 | 1 |   | 1 |
| 7 | Jiangyou | 3 | 4755 | 27 | 2 | 1 |   | 1 |
| 7 | Jiangyou | 3 | 4756 | 42 | 2 | 1 | 1 |   |
| 7 | Jiangyou | 3 | 4757 | 31 | 2 | 2 | 1 | 1 |
| 7 | Jiangyou | 3 | 4758 | 63 | 2 | 1 | 1 | 1 |
| 7 | Jiangyou | 3 | 4759 | 68 | 3 | 1 | 1 | 1 |
| 7 | Jiangyou | 3 | 4760 | 84 | 3 | 1 | 1 |   |
| 7 | Jiangyou | 3 | 4761 | 40 | 2 | 1 | 1 |   |
| 7 | Jiangyou | 3 | 4762 | 84 | 3 | 1 | 1 | 1 |
| 7 | Jiangyou | 3 | 4763 | 37 | 2 | 2 | 1 |   |
| 7 | Jiangyou | 3 | 4764 | 38 | 2 | 2 | 1 | 1 |
| 7 | Jiangyou | 3 | 4765 | 50 | 2 | 1 | 1 | 1 |
| 7 | Jiangyou | 3 | 4766 | 82 | 3 | 1 | 1 |   |
| 7 | Jiangyou | 3 | 4767 | 43 | 2 | 1 | 1 |   |
| 7 | Jiangyou | 3 | 4768 | 16 | 2 | 1 | 1 |   |
| 7 | Jiangyou | 3 | 4769 | 62 | 2 | 2 | 1 |   |
| 7 | Jiangyou | 3 | 4770 | 62 | 2 | 1 | 1 | 1 |
| 7 | Jiangyou | 3 | 4771 | 54 | 2 | 2 | 1 | 1 |
| 7 | Jiangyou | 3 | 4772 | 85 | 3 | 1 | 1 | 1 |
| 7 | Jiangyou | 3 | 4773 | 19 | 2 | 1 |   | 1 |

|   |          |   |      |    |   |   |   |   |
|---|----------|---|------|----|---|---|---|---|
| 7 | Jiangyou | 3 | 4774 | 60 | 2 | 2 | 1 | 1 |
| 7 | Jiangyou | 3 | 4775 | 51 | 2 | 2 |   | 1 |
| 7 | Jiangyou | 3 | 4776 | 83 | 3 | 1 | 1 | 1 |
| 7 | Jiangyou | 3 | 4777 | 32 | 2 | 1 | 1 | 1 |
| 7 | Jiangyou | 3 | 4778 | 62 | 2 | 2 | 1 | 1 |
| 7 | Jiangyou | 3 | 4779 | 39 | 2 | 2 | 1 |   |
| 7 | Jiangyou | 3 | 4780 | 83 | 3 | 1 | 1 |   |
| 7 | Jiangyou | 3 | 4781 | 71 | 3 | 1 | 1 |   |
| 7 | Jiangyou | 3 | 4782 | 35 | 2 | 1 | 1 |   |
| 7 | Jiangyou | 3 | 4783 | 16 | 2 | 2 | 1 |   |
| 7 | Jiangyou | 3 | 4784 | 78 | 3 | 1 | 1 |   |
| 7 | Jiangyou | 3 | 4785 | 50 | 2 | 1 | 1 | 1 |
| 7 | Jiangyou | 3 | 4786 | 17 | 2 | 1 | 1 |   |
| 7 | Jiangyou | 3 | 4787 | 35 | 2 | 2 | 1 |   |
| 7 | Jiangyou | 3 | 4788 | 56 | 2 | 1 | 1 | 1 |
| 7 | Jiangyou | 3 | 4789 | 67 | 3 | 2 | 1 | 1 |
| 7 | Jiangyou | 3 | 4790 | 72 | 3 | 1 | 1 |   |
| 7 | Jiangyou | 3 | 4791 | 47 | 2 | 1 | 1 | 1 |
| 7 | Jiangyou | 3 | 4792 | 39 | 2 | 1 | 1 |   |
| 7 | Jiangyou | 3 | 4793 | 45 | 2 | 1 | 1 | 1 |
| 7 | Jiangyou | 3 | 4794 | 49 | 2 | 1 | 1 | 1 |
| 7 | Jiangyou | 3 | 4795 | 16 | 2 | 1 | 1 |   |
| 7 | Jiangyou | 3 | 4796 | 47 | 2 | 2 | 1 |   |
| 7 | Jiangyou | 3 | 4797 | 42 | 2 | 1 |   | 1 |
| 7 | Jiangyou | 3 | 4798 | 29 | 2 | 2 | 1 |   |
| 7 | Jiangyou | 3 | 4799 | 28 | 2 | 1 |   | 1 |
| 7 | Jiangyou | 3 | 4800 | 73 | 3 | 2 |   | 1 |
| 7 | Jiangyou | 3 | 4801 | 81 | 3 | 1 | 1 | 1 |
| 7 | Jiangyou | 3 | 4802 | 37 | 2 | 1 | 1 |   |
| 7 | Jiangyou | 3 | 4803 | 18 | 2 | 1 | 1 | 1 |
| 7 | Jiangyou | 3 | 4804 | 45 | 2 | 1 | 1 | 1 |
| 7 | Jiangyou | 3 | 4805 | 68 | 3 | 2 | 1 | 1 |
| 7 | Jiangyou | 3 | 4806 | 20 | 2 | 2 |   | 1 |
| 7 | Jiangyou | 3 | 4807 | 51 | 2 | 1 | 1 |   |
| 7 | Jiangyou | 3 | 4808 | 50 | 2 | 2 |   | 1 |
| 7 | Jiangyou | 3 | 4809 | 42 | 2 | 1 | 1 | 1 |
| 7 | Jiangyou | 3 | 4810 | 35 | 2 | 1 | 1 |   |
| 7 | Jiangyou | 3 | 4811 | 74 | 3 | 2 | 1 |   |
| 7 | Jiangyou | 3 | 4812 | 45 | 2 | 1 | 1 | 1 |
| 7 | Jiangyou | 3 | 4813 | 46 | 2 | 2 | 1 | 1 |
| 7 | Jiangyou | 3 | 4814 | 63 | 2 | 1 | 1 | 1 |
| 7 | Jiangyou | 3 | 4815 | 51 | 2 | 2 | 1 |   |
| 7 | Jiangyou | 3 | 4816 | 37 | 2 | 2 |   | 1 |
| 7 | Jiangyou | 3 | 4817 | 52 | 2 | 1 | 1 | 1 |
| 7 | Jiangyou | 3 | 4818 | 59 | 2 | 1 | 1 |   |
| 7 | Jiangyou | 3 | 4819 | 61 | 2 | 2 | 1 |   |
| 7 | Jiangyou | 3 | 4820 | 48 | 2 | 1 | 2 |   |
| 7 | Jiangyou | 3 | 4821 | 69 | 3 | 1 | 2 |   |
| 7 | Jiangyou | 3 | 4822 | 40 | 2 | 1 | 2 |   |
| 7 | Jiangyou | 3 | 4823 | 35 | 2 | 1 | 2 |   |
| 7 | Jiangyou | 3 | 4824 | 26 | 2 | 1 | 2 |   |
| 7 | Jiangyou | 3 | 4825 | 19 | 2 | 2 | 2 |   |
| 7 | Jiangyou | 3 | 4826 | 39 | 2 | 1 | 2 |   |
| 7 | Jiangyou | 3 | 4827 | 46 | 2 | 1 | 2 |   |

|   |          |   |      |    |   |   |   |  |
|---|----------|---|------|----|---|---|---|--|
| 7 | Jiangyou | 3 | 4828 | 20 | 2 | 2 | 2 |  |
| 7 | Jiangyou | 3 | 4829 | 75 | 3 | 2 | 2 |  |
| 7 | Jiangyou | 3 | 4830 | 33 | 2 | 1 | 2 |  |
| 7 | Jiangyou | 3 | 4831 | 19 | 2 | 1 | 2 |  |
| 7 | Jiangyou | 3 | 4832 | 81 | 3 | 1 | 2 |  |
| 7 | Jiangyou | 3 | 4833 | 36 | 2 | 2 | 2 |  |
| 7 | Jiangyou | 3 | 4834 | 23 | 2 | 1 | 2 |  |
| 7 | Jiangyou | 3 | 4835 | 49 | 2 | 1 | 2 |  |
| 7 | Jiangyou | 3 | 4836 | 79 | 3 | 1 | 2 |  |
| 7 | Jiangyou | 3 | 4837 | 46 | 2 | 1 | 2 |  |
| 7 | Jiangyou | 3 | 4838 | 26 | 2 | 2 | 2 |  |
| 7 | Jiangyou | 3 | 4839 | 73 | 3 | 2 | 2 |  |
| 7 | Jiangyou | 3 | 4840 | 62 | 2 | 1 | 2 |  |
| 7 | Jiangyou | 3 | 4841 | 89 | 3 | 2 | 2 |  |
| 7 | Jiangyou | 3 | 4842 | 20 | 2 | 1 | 2 |  |
| 7 | Jiangyou | 3 | 4843 | 22 | 2 | 1 | 2 |  |
| 7 | Jiangyou | 3 | 4844 | 50 | 2 | 1 | 2 |  |
| 7 | Jiangyou | 3 | 4845 | 47 | 2 | 1 | 2 |  |
| 7 | Jiangyou | 3 | 4846 | 48 | 2 | 2 | 2 |  |
| 7 | Jiangyou | 3 | 4847 | 89 | 3 | 1 | 2 |  |
| 7 | Jiangyou | 3 | 4848 | 41 | 2 | 1 | 2 |  |
| 7 | Jiangyou | 3 | 4849 | 72 | 3 | 1 | 2 |  |
| 7 | Jiangyou | 3 | 4850 | 25 | 2 | 2 | 2 |  |
| 7 | Jiangyou | 3 | 4851 | 70 | 3 | 2 | 2 |  |
| 7 | Jiangyou | 3 | 4852 | 20 | 2 | 1 | 2 |  |
| 7 | Jiangyou | 3 | 4853 | 45 | 2 | 1 | 2 |  |
| 7 | Jiangyou | 3 | 4854 | 37 | 2 | 1 | 2 |  |
| 7 | Jiangyou | 3 | 4855 | 46 | 2 | 2 | 2 |  |
| 7 | Jiangyou | 3 | 4856 | 38 | 2 | 2 | 2 |  |
| 7 | Jiangyou | 3 | 4857 | 62 | 2 | 1 | 2 |  |
| 7 | Jiangyou | 3 | 4858 | 56 | 2 | 1 | 2 |  |
| 7 | Jiangyou | 3 | 4859 | 64 | 2 | 1 | 2 |  |
| 7 | Jiangyou | 3 | 4860 | 60 | 2 | 2 | 2 |  |
| 7 | Jiangyou | 3 | 4861 | 53 | 2 | 1 | 2 |  |
| 7 | Jiangyou | 3 | 4862 | 76 | 3 | 2 | 2 |  |
| 7 | Jiangyou | 3 | 4863 | 64 | 2 | 1 | 2 |  |
| 7 | Jiangyou | 3 | 4864 | 62 | 2 | 1 | 2 |  |
| 7 | Jiangyou | 3 | 4865 | 60 | 2 | 1 | 2 |  |
| 7 | Jiangyou | 3 | 4866 | 27 | 2 | 2 | 2 |  |
| 7 | Jiangyou | 3 | 4867 | 50 | 2 | 1 | 2 |  |
| 7 | Jiangyou | 3 | 4868 | 30 | 2 | 1 | 2 |  |
| 7 | Jiangyou | 3 | 4869 | 65 | 3 | 1 | 2 |  |
| 7 | Jiangyou | 3 | 4870 | 72 | 3 | 2 | 2 |  |
| 7 | Jiangyou | 3 | 4871 | 53 | 2 | 2 | 2 |  |
| 7 | Jiangyou | 3 | 4872 | 26 | 2 | 2 | 2 |  |
| 7 | Jiangyou | 3 | 4873 | 34 | 2 | 1 | 2 |  |
| 7 | Jiangyou | 3 | 4874 | 39 | 2 | 1 | 2 |  |
| 7 | Jiangyou | 3 | 4875 | 46 | 2 | 1 | 2 |  |
| 7 | Jiangyou | 3 | 4876 | 33 | 2 | 1 | 2 |  |
| 7 | Jiangyou | 3 | 4877 | 78 | 3 | 1 | 2 |  |
| 7 | Jiangyou | 3 | 4878 | 31 | 2 | 1 | 2 |  |
| 7 | Jiangyou | 3 | 4879 | 21 | 2 | 1 | 2 |  |
| 7 | Jiangyou | 3 | 4880 | 45 | 2 | 1 | 2 |  |
| 7 | Jiangyou | 3 | 4881 | 20 | 2 | 1 | 2 |  |

|   |          |   |      |    |   |   |   |  |
|---|----------|---|------|----|---|---|---|--|
| 7 | Jiangyou | 3 | 4882 | 53 | 2 | 2 | 2 |  |
| 7 | Jiangyou | 3 | 4883 | 49 | 2 | 2 | 2 |  |
| 7 | Jiangyou | 3 | 4884 | 33 | 2 | 2 | 2 |  |
| 7 | Jiangyou | 3 | 4885 | 44 | 2 | 1 | 2 |  |
| 7 | Jiangyou | 3 | 4886 | 55 | 2 | 1 | 2 |  |
| 7 | Jiangyou | 3 | 4887 | 40 | 2 | 2 | 2 |  |
| 7 | Jiangyou | 3 | 4888 | 73 | 3 | 1 | 2 |  |
| 7 | Jiangyou | 3 | 4889 | 46 | 2 | 1 | 2 |  |
| 7 | Jiangyou | 3 | 4890 | 43 | 2 | 1 | 2 |  |
| 7 | Jiangyou | 3 | 4891 | 23 | 2 | 1 | 2 |  |
| 7 | Jiangyou | 3 | 4892 | 42 | 2 | 1 | 2 |  |
| 7 | Jiangyou | 3 | 4893 | 55 | 2 | 1 | 2 |  |
| 7 | Jiangyou | 3 | 4894 | 61 | 2 | 1 | 2 |  |
| 7 | Jiangyou | 3 | 4895 | 62 | 2 | 1 | 2 |  |
| 7 | Jiangyou | 3 | 4896 | 79 | 3 | 1 | 2 |  |
| 7 | Jiangyou | 3 | 4897 | 55 | 2 | 1 | 2 |  |
| 7 | Jiangyou | 3 | 4898 | 48 | 2 | 2 | 2 |  |
| 7 | Jiangyou | 3 | 4899 | 35 | 2 | 2 | 2 |  |
| 7 | Jiangyou | 3 | 4900 | 47 | 2 | 2 | 2 |  |
| 7 | Jiangyou | 3 | 4901 | 70 | 3 | 1 | 2 |  |
| 7 | Jiangyou | 3 | 4902 | 66 | 3 | 1 | 2 |  |
| 7 | Jiangyou | 3 | 4903 | 32 | 2 | 1 | 2 |  |
| 7 | Jiangyou | 3 | 4904 | 21 | 2 | 1 | 2 |  |
| 7 | Jiangyou | 3 | 4905 | 63 | 2 | 1 | 2 |  |
| 7 | Jiangyou | 3 | 4906 | 25 | 2 | 1 | 2 |  |
| 7 | Jiangyou | 3 | 4907 | 42 | 2 | 1 | 2 |  |
| 7 | Jiangyou | 3 | 4908 | 29 | 2 | 2 | 2 |  |
| 7 | Jiangyou | 3 | 4909 | 77 | 3 | 1 | 2 |  |
| 7 | Jiangyou | 3 | 4910 | 46 | 2 | 1 | 2 |  |
| 7 | Jiangyou | 3 | 4911 | 57 | 2 | 1 | 2 |  |
| 7 | Jiangyou | 3 | 4912 | 30 | 2 | 2 | 2 |  |
| 7 | Jiangyou | 3 | 4913 | 36 | 2 | 1 | 2 |  |
| 7 | Jiangyou | 3 | 4914 | 44 | 2 | 2 | 2 |  |
| 7 | Jiangyou | 3 | 4915 | 44 | 2 | 1 | 2 |  |
| 7 | Jiangyou | 3 | 4916 | 50 | 2 | 1 | 2 |  |
| 7 | Jiangyou | 3 | 4917 | 29 | 2 | 1 | 2 |  |
| 7 | Jiangyou | 3 | 4918 | 43 | 2 | 1 | 2 |  |
| 7 | Jiangyou | 3 | 4919 | 29 | 2 | 2 | 2 |  |
| 7 | Jiangyou | 3 | 4920 | 43 | 2 | 1 | 2 |  |
| 7 | Jiangyou | 3 | 4921 | 22 | 2 | 1 | 2 |  |
| 7 | Jiangyou | 3 | 4922 | 82 | 3 | 1 | 2 |  |
| 7 | Jiangyou | 3 | 4923 | 51 | 2 | 1 | 2 |  |
| 7 | Jiangyou | 3 | 4924 | 56 | 2 | 1 | 2 |  |
| 7 | Jiangyou | 3 | 4925 | 48 | 2 | 1 | 2 |  |
| 7 | Jiangyou | 3 | 4926 | 50 | 2 | 1 | 2 |  |
| 7 | Jiangyou | 3 | 4927 | 73 | 3 | 1 | 2 |  |
| 7 | Jiangyou | 3 | 4928 | 28 | 2 | 2 | 2 |  |
| 7 | Jiangyou | 3 | 4929 | 17 | 2 | 1 | 2 |  |
| 7 | Jiangyou | 3 | 4930 | 59 | 2 | 1 | 2 |  |
| 7 | Jiangyou | 3 | 4931 | 53 | 2 | 1 | 2 |  |
| 7 | Jiangyou | 3 | 4932 | 65 | 3 | 1 | 2 |  |
| 7 | Jiangyou | 3 | 4933 | 54 | 2 | 1 | 2 |  |
| 7 | Jiangyou | 3 | 4934 | 22 | 2 | 1 | 2 |  |
| 7 | Jiangyou | 3 | 4935 | 53 | 2 | 1 | 2 |  |

|   |           |   |      |    |   |   |   |   |
|---|-----------|---|------|----|---|---|---|---|
| 7 | Jiangyou  | 3 | 4936 | 56 | 2 | 1 | 2 |   |
| 7 | Jiangyou  | 3 | 4937 | 46 | 2 | 1 | 2 |   |
| 7 | Jiangyou  | 3 | 4938 | 49 | 2 | 1 | 2 |   |
| 7 | Jiangyou  | 3 | 4939 | 63 | 2 | 1 | 2 |   |
| 7 | Jiangyou  | 3 | 4940 | 48 | 2 | 1 | 2 |   |
| 7 | Jiangyou  | 3 | 4941 | 60 | 2 | 2 | 2 |   |
| 7 | Jiangyou  | 3 | 4942 | 66 | 3 | 1 | 2 |   |
| 7 | Jiangyou  | 3 | 4943 | 68 | 3 | 1 | 2 |   |
| 7 | Jiangyou  | 3 | 4944 | 56 | 2 | 1 | 2 |   |
| 7 | Jiangyou  | 3 | 4945 | 69 | 3 | 2 | 2 |   |
| 7 | Jiangyou  | 3 | 4946 | 59 | 2 | 2 | 2 |   |
| 7 | Jiangyou  | 3 | 4947 | 66 | 3 | 2 | 2 |   |
| 7 | Jiangyou  | 3 | 4948 | 23 | 2 | 1 | 2 |   |
| 7 | Jiangyou  | 3 | 4949 | 68 | 3 | 1 | 2 |   |
| 7 | Jiangyou  | 3 | 4950 | 81 | 3 | 1 | 2 |   |
| 7 | Jiangyou  | 3 | 4951 | 45 | 2 | 1 | 2 |   |
| 7 | Jiangyou  | 3 | 4952 | 63 | 2 | 1 | 2 |   |
| 7 | Jiangyou  | 3 | 4953 | 81 | 3 | 1 | 2 |   |
| 7 | Jiangyou  | 3 | 4954 | 39 | 2 | 1 | 2 |   |
| 7 | Jiangyou  | 3 | 4955 | 29 | 2 | 1 | 2 |   |
| 7 | Jiangyou  | 3 | 4956 | 67 | 3 | 1 | 2 |   |
| 7 | Jiangyou  | 3 | 4957 | 65 | 3 | 2 | 2 |   |
| 7 | Jiangyou  | 3 | 4958 | 66 | 3 | 1 | 2 |   |
| 7 | Jiangyou  | 3 | 4959 | 77 | 3 | 1 | 2 |   |
| 7 | Jiangyou  | 3 | 4960 | 85 | 3 | 2 | 2 |   |
| 7 | Jiangyou  | 3 | 4961 | 47 | 2 | 1 | 2 |   |
| 7 | Jiangyou  | 3 | 4962 | 70 | 3 | 1 | 2 |   |
| 7 | Jiangyou  | 3 | 4963 | 64 | 2 | 1 | 2 |   |
| 7 | Jiangyou  | 3 | 4964 | 69 | 3 | 1 | 2 |   |
| 7 | Jiangyou  | 3 | 4965 | 39 | 2 | 1 | 2 |   |
| 7 | Jiangyou  | 3 | 4966 | 50 | 2 | 1 | 2 |   |
| 7 | Jiangyou  | 3 | 4967 | 38 | 2 | 1 | 1 |   |
| 7 | Jiangyou  | 3 | 4968 | 13 | 1 | 2 | 1 |   |
| 7 | Jiangyou  | 3 | 4969 | 59 | 2 | 2 | 1 |   |
| 7 | Jiangyou  | 3 | 4970 | 55 | 2 | 1 | 1 | 1 |
| 7 | Jiangyou  | 3 | 4971 | 56 | 2 | 1 | 1 | 1 |
| 7 | Jiangyou  | 3 | 4972 | 41 | 2 | 2 | 1 |   |
| 8 | Dongchuan | 3 | 4973 | 48 | 2 | 2 | 1 |   |
| 8 | Dongchuan | 3 | 4974 | 71 | 3 | 2 | 1 |   |
| 8 | Dongchuan | 3 | 4975 | 75 | 3 | 1 | 1 | 1 |
| 8 | Dongchuan | 3 | 4976 | 70 | 3 | 1 | 1 |   |
| 8 | Dongchuan | 3 | 4977 | 65 | 3 | 1 | 1 | 1 |
| 8 | Dongchuan | 3 | 4978 | 49 | 2 | 1 | 1 |   |
| 8 | Dongchuan | 3 | 4979 | 65 | 3 | 1 | 1 | 1 |
| 8 | Dongchuan | 3 | 4980 | 94 | 3 | 2 | 1 | 1 |
| 8 | Dongchuan | 3 | 4981 | 40 | 2 | 1 | 1 | 1 |
| 8 | Dongchuan | 3 | 4982 | 61 | 2 | 2 | 1 | 1 |
| 8 | Dongchuan | 3 | 4983 | 53 | 2 | 1 | 1 |   |
| 8 | Dongchuan | 3 | 4984 | 55 | 2 | 1 | 1 |   |
| 8 | Dongchuan | 3 | 4985 | 40 | 2 | 2 | 1 |   |
| 8 | Dongchuan | 3 | 4986 | 88 | 3 | 2 | 1 |   |
| 8 | Dongchuan | 3 | 4987 | 53 | 2 | 1 | 1 | 1 |
| 8 | Dongchuan | 3 | 4988 | 69 | 3 | 1 |   | 1 |
| 8 | Dongchuan | 3 | 4989 | 84 | 3 | 1 | 1 |   |

|   |           |   |      |    |   |   |   |   |
|---|-----------|---|------|----|---|---|---|---|
| 8 | Dongchuan | 3 | 4990 | 56 | 2 | 1 | 1 |   |
| 8 | Dongchuan | 3 | 4991 | 42 | 2 | 2 | 1 |   |
| 8 | Dongchuan | 3 | 4992 | 81 | 3 | 1 | 1 | 1 |
| 8 | Dongchuan | 3 | 4993 | 67 | 3 | 2 | 1 |   |
| 8 | Dongchuan | 3 | 4994 | 38 | 2 | 1 |   | 1 |
| 8 | Dongchuan | 3 | 4995 | 68 | 3 | 1 | 1 |   |
| 8 | Dongchuan | 3 | 4996 | 64 | 2 | 1 | 1 |   |
| 8 | Dongchuan | 3 | 4997 | 64 | 2 | 1 | 1 |   |
| 8 | Dongchuan | 3 | 4998 | 50 | 2 | 1 | 1 |   |
| 8 | Dongchuan | 3 | 4999 | 21 | 2 | 2 |   | 1 |
| 8 | Dongchuan | 3 | 5000 | 30 | 2 | 1 | 1 |   |
| 8 | Dongchuan | 3 | 5001 | 67 | 3 | 1 | 1 |   |
| 8 | Dongchuan | 3 | 5002 | 44 | 2 | 1 | 1 |   |
| 8 | Dongchuan | 3 | 5003 | 64 | 2 | 2 | 1 |   |
| 8 | Dongchuan | 3 | 5004 | 88 | 3 | 2 | 1 |   |
| 8 | Dongchuan | 3 | 5005 | 59 | 2 | 1 | 1 |   |
| 8 | Dongchuan | 3 | 5006 | 64 | 2 | 2 |   | 1 |
| 8 | Dongchuan | 3 | 5007 | 48 | 2 | 1 |   | 1 |
| 8 | Dongchuan | 3 | 5008 | 36 | 2 | 1 | 1 |   |
| 8 | Dongchuan | 3 | 5009 | 67 | 3 | 2 | 1 |   |
| 8 | Dongchuan | 3 | 5010 | 49 | 2 | 1 | 1 |   |
| 8 | Dongchuan | 3 | 5011 | 29 | 2 | 1 |   | 1 |
| 8 | Dongchuan | 3 | 5012 | 75 | 3 | 1 | 1 | 1 |
| 8 | Dongchuan | 3 | 5013 | 46 | 2 | 1 | 1 |   |
| 8 | Dongchuan | 3 | 5014 | 57 | 2 | 1 | 1 | 1 |
| 8 | Dongchuan | 3 | 5015 | 60 | 2 | 1 | 1 |   |
| 8 | Dongchuan | 3 | 5016 | 41 | 2 | 1 | 1 |   |
| 8 | Dongchuan | 3 | 5017 | 67 | 3 | 1 | 1 |   |
| 8 | Dongchuan | 3 | 5018 | 84 | 3 | 2 | 1 |   |
| 8 | Dongchuan | 3 | 5019 | 33 | 2 | 2 |   | 1 |
| 8 | Dongchuan | 3 | 5020 | 78 | 3 | 1 | 1 | 1 |
| 8 | Dongchuan | 3 | 5021 | 15 | 2 | 2 |   | 1 |
| 8 | Dongchuan | 3 | 5022 | 81 | 3 | 1 | 1 |   |
| 8 | Dongchuan | 3 | 5023 | 53 | 2 | 2 |   | 1 |
| 8 | Dongchuan | 3 | 5024 | 22 | 2 | 1 | 1 | 1 |
| 8 | Dongchuan | 3 | 5025 | 58 | 2 | 1 | 1 |   |
| 8 | Dongchuan | 3 | 5026 | 62 | 2 | 1 | 1 | 1 |
| 8 | Dongchuan | 3 | 5027 | 84 | 3 | 2 | 1 |   |
| 8 | Dongchuan | 3 | 5028 | 63 | 2 | 1 |   | 1 |
| 8 | Dongchuan | 3 | 5029 | 62 | 2 | 1 | 1 | 1 |
| 8 | Dongchuan | 3 | 5030 | 50 | 2 | 1 | 1 | 1 |
| 8 | Dongchuan | 3 | 5031 | 62 | 2 | 1 | 1 | 1 |
| 8 | Dongchuan | 3 | 5032 | 36 | 2 | 1 | 1 |   |
| 8 | Dongchuan | 3 | 5033 | 40 | 2 | 2 | 1 |   |
| 8 | Dongchuan | 3 | 5034 | 45 | 2 | 1 |   | 1 |
| 8 | Dongchuan | 3 | 5035 | 44 | 2 | 1 | 1 |   |
| 8 | Dongchuan | 3 | 5036 | 48 | 2 | 1 | 1 |   |
| 8 | Dongchuan | 3 | 5037 | 66 | 3 | 1 | 1 |   |
| 8 | Dongchuan | 3 | 5038 | 32 | 2 | 1 | 1 |   |
| 8 | Dongchuan | 3 | 5039 | 82 | 3 | 2 | 1 |   |
| 8 | Dongchuan | 3 | 5040 | 50 | 2 | 1 | 1 | 1 |
| 8 | Dongchuan | 3 | 5041 | 51 | 2 | 1 | 1 | 1 |
| 8 | Dongchuan | 3 | 5042 | 64 | 2 | 1 | 1 |   |
| 8 | Dongchuan | 3 | 5043 | 77 | 3 | 1 | 1 |   |

|   |           |   |      |    |   |   |   |   |
|---|-----------|---|------|----|---|---|---|---|
| 8 | Dongchuan | 3 | 5044 | 45 | 2 | 1 |   | 1 |
| 8 | Dongchuan | 3 | 5045 | 47 | 2 | 1 | 1 |   |
| 8 | Dongchuan | 3 | 5046 | 36 | 2 | 1 | 1 |   |
| 8 | Dongchuan | 3 | 5047 | 39 | 2 | 1 | 1 |   |
| 8 | Dongchuan | 3 | 5048 | 72 | 3 | 1 | 1 |   |
| 8 | Dongchuan | 3 | 5049 | 57 | 2 | 1 | 1 | 1 |
| 8 | Dongchuan | 3 | 5050 | 90 | 3 | 1 | 1 |   |
| 8 | Dongchuan | 3 | 5051 | 64 | 2 | 2 | 1 | 1 |
| 8 | Dongchuan | 3 | 5052 | 38 | 2 | 1 | 1 | 1 |
| 8 | Dongchuan | 3 | 5053 | 36 | 2 | 2 | 1 | 1 |
| 8 | Dongchuan | 3 | 5054 | 82 | 3 | 2 | 1 | 1 |
| 8 | Dongchuan | 3 | 5055 | 75 | 3 | 1 | 1 |   |
| 8 | Dongchuan | 3 | 5056 | 71 | 3 | 1 | 1 |   |
| 8 | Dongchuan | 3 | 5057 | 43 | 2 | 1 | 1 | 1 |
| 8 | Dongchuan | 3 | 5058 | 13 | 1 | 2 |   | 1 |
| 8 | Dongchuan | 3 | 5059 | 44 | 2 | 1 | 1 |   |
| 8 | Dongchuan | 3 | 5060 | 68 | 3 | 1 | 1 |   |
| 8 | Dongchuan | 3 | 5061 | 60 | 2 | 2 | 1 |   |
| 8 | Dongchuan | 3 | 5062 | 73 | 3 | 1 | 1 |   |
| 8 | Dongchuan | 3 | 5063 | 27 | 2 | 1 | 1 |   |
| 8 | Dongchuan | 3 | 5064 | 36 | 2 | 2 | 1 |   |
| 8 | Dongchuan | 3 | 5065 | 33 | 2 | 2 | 1 |   |
| 8 | Dongchuan | 3 | 5066 | 29 | 2 | 1 | 1 | 1 |
| 8 | Dongchuan | 3 | 5067 | 21 | 2 | 1 | 1 |   |
| 8 | Dongchuan | 3 | 5068 | 34 | 2 | 2 | 1 |   |
| 8 | Dongchuan | 3 | 5069 | 28 | 2 | 1 | 1 |   |
| 8 | Dongchuan | 3 | 5070 | 33 | 2 | 1 | 1 |   |
| 8 | Dongchuan | 3 | 5071 | 63 | 2 | 1 |   | 1 |
| 8 | Dongchuan | 3 | 5072 | 30 | 2 | 1 | 1 |   |
| 8 | Dongchuan | 3 | 5073 | 22 | 2 | 1 | 1 | 1 |
| 8 | Dongchuan | 3 | 5074 | 25 | 2 | 1 |   | 1 |
| 8 | Dongchuan | 3 | 5075 | 49 | 2 | 1 | 1 |   |
| 8 | Dongchuan | 3 | 5076 | 57 | 2 | 1 | 1 | 1 |
| 8 | Dongchuan | 3 | 5077 | 77 | 3 | 1 | 1 |   |
| 8 | Dongchuan | 3 | 5078 | 23 | 2 | 1 |   | 1 |
| 8 | Dongchuan | 3 | 5079 | 68 | 3 | 1 | 1 |   |
| 8 | Dongchuan | 3 | 5080 | 38 | 2 | 1 | 1 |   |
| 8 | Dongchuan | 3 | 5081 | 73 | 3 | 2 | 1 |   |
| 8 | Dongchuan | 3 | 5082 | 35 | 2 | 2 |   | 1 |
| 8 | Dongchuan | 3 | 5083 | 49 | 2 | 1 |   | 1 |
| 8 | Dongchuan | 3 | 5084 | 65 | 3 | 1 | 1 |   |
| 8 | Dongchuan | 3 | 5085 | 59 | 2 | 1 | 1 |   |
| 8 | Dongchuan | 3 | 5086 | 80 | 3 | 1 | 1 | 1 |
| 8 | Dongchuan | 3 | 5087 | 46 | 2 | 2 | 1 |   |
| 8 | Dongchuan | 3 | 5088 | 43 | 2 | 1 |   | 1 |
| 8 | Dongchuan | 3 | 5089 | 52 | 2 | 1 |   | 1 |
| 8 | Dongchuan | 3 | 5090 | 18 | 2 | 2 | 1 | 1 |
| 8 | Dongchuan | 3 | 5091 | 37 | 2 | 2 | 1 |   |
| 8 | Dongchuan | 3 | 5092 | 53 | 2 | 1 |   | 1 |
| 8 | Dongchuan | 3 | 5093 | 75 | 3 | 1 | 1 |   |
| 8 | Dongchuan | 3 | 5094 | 90 | 3 | 1 | 1 |   |
| 8 | Dongchuan | 3 | 5095 | 83 | 3 | 2 | 1 |   |
| 8 | Dongchuan | 3 | 5096 | 65 | 3 | 1 | 1 |   |
| 8 | Dongchuan | 3 | 5097 | 31 | 2 | 1 | 1 |   |

|   |           |   |      |    |   |   |   |   |
|---|-----------|---|------|----|---|---|---|---|
| 8 | Dongchuan | 3 | 5098 | 71 | 3 | 2 | 1 |   |
| 8 | Dongchuan | 3 | 5099 | 56 | 2 | 1 | 1 | 1 |
| 8 | Dongchuan | 3 | 5100 | 53 | 2 | 1 | 1 |   |
| 8 | Dongchuan | 3 | 5101 | 54 | 2 | 1 | 1 |   |
| 8 | Dongchuan | 3 | 5102 | 52 | 2 | 1 | 1 |   |
| 8 | Dongchuan | 3 | 5103 | 18 | 2 | 1 |   | 1 |
| 8 | Dongchuan | 3 | 5104 | 82 | 3 | 1 | 1 |   |
| 8 | Dongchuan | 3 | 5105 | 69 | 3 | 1 | 1 |   |
| 8 | Dongchuan | 3 | 5106 | 62 | 2 | 1 | 1 | 1 |
| 8 | Dongchuan | 3 | 5107 | 89 | 3 | 1 | 1 |   |
| 8 | Dongchuan | 3 | 5108 | 90 | 3 | 1 | 1 |   |
| 8 | Dongchuan | 3 | 5109 | 33 | 2 | 2 |   | 1 |
| 8 | Dongchuan | 3 | 5110 | 38 | 2 | 1 | 1 |   |
| 8 | Dongchuan | 3 | 5111 | 44 | 2 | 1 | 1 |   |
| 8 | Dongchuan | 3 | 5112 | 82 | 3 | 1 | 1 |   |
| 8 | Dongchuan | 3 | 5113 | 67 | 3 | 2 | 1 |   |
| 8 | Dongchuan | 3 | 5114 | 46 | 2 | 1 | 1 |   |
| 8 | Dongchuan | 3 | 5115 | 65 | 3 | 2 | 1 | 1 |
| 8 | Dongchuan | 3 | 5116 | 66 | 3 | 2 | 1 |   |
| 8 | Dongchuan | 3 | 5117 | 74 | 3 | 1 | 1 | 1 |
| 8 | Dongchuan | 3 | 5118 | 89 | 3 | 1 | 1 |   |
| 8 | Dongchuan | 3 | 5119 | 59 | 2 | 1 | 1 |   |
| 8 | Dongchuan | 3 | 5120 | 52 | 2 | 1 |   | 1 |
| 8 | Dongchuan | 3 | 5121 | 40 | 2 | 1 |   | 1 |
| 8 | Dongchuan | 3 | 5122 | 53 | 2 | 2 |   | 1 |
| 8 | Dongchuan | 3 | 5123 | 45 | 2 | 1 | 2 |   |
| 8 | Dongchuan | 3 | 5124 | 54 | 2 | 1 | 2 |   |
| 8 | Dongchuan | 3 | 5125 | 52 | 2 | 1 | 2 |   |
| 8 | Dongchuan | 3 | 5126 | 61 | 2 | 1 | 2 |   |
| 8 | Dongchuan | 3 | 5127 | 33 | 2 | 1 | 2 |   |
| 8 | Dongchuan | 3 | 5128 | 53 | 2 | 2 | 2 |   |
| 8 | Dongchuan | 3 | 5129 | 31 | 2 | 1 | 2 |   |
| 8 | Dongchuan | 3 | 5130 | 72 | 3 | 2 | 2 |   |
| 8 | Dongchuan | 3 | 5131 | 46 | 2 | 2 | 2 |   |
| 8 | Dongchuan | 3 | 5132 | 47 | 2 | 1 | 2 |   |
| 8 | Dongchuan | 3 | 5133 | 37 | 2 | 1 | 2 |   |
| 8 | Dongchuan | 3 | 5134 | 76 | 3 | 1 | 2 |   |
| 8 | Dongchuan | 3 | 5135 | 40 | 2 | 1 | 2 |   |
| 8 | Dongchuan | 3 | 5136 | 26 | 2 | 2 | 2 |   |
| 8 | Dongchuan | 3 | 5137 | 30 | 2 | 1 | 2 |   |
| 8 | Dongchuan | 3 | 5138 | 56 | 2 | 1 | 2 |   |
| 8 | Dongchuan | 3 | 5139 | 33 | 2 | 1 | 2 |   |
| 8 | Dongchuan | 3 | 5140 | 38 | 2 | 1 | 2 |   |
| 8 | Dongchuan | 3 | 5141 | 74 | 3 | 1 | 2 |   |
| 8 | Dongchuan | 3 | 5142 | 51 | 2 | 2 | 2 |   |
| 8 | Dongchuan | 3 | 5143 | 75 | 3 | 2 | 2 |   |
| 8 | Dongchuan | 3 | 5144 | 43 | 2 | 1 | 2 |   |
| 8 | Dongchuan | 3 | 5145 | 59 | 2 | 1 | 2 |   |
| 8 | Dongchuan | 3 | 5146 | 27 | 2 | 2 | 2 |   |
| 8 | Dongchuan | 3 | 5147 | 73 | 3 | 2 | 2 |   |
| 8 | Dongchuan | 3 | 5148 | 41 | 2 | 1 | 2 |   |
| 8 | Dongchuan | 3 | 5149 | 53 | 2 | 2 | 2 |   |
| 8 | Dongchuan | 3 | 5150 | 22 | 2 | 2 | 2 |   |
| 8 | Dongchuan | 3 | 5151 | 42 | 2 | 1 | 2 |   |



|   |           |   |      |    |   |   |   |   |
|---|-----------|---|------|----|---|---|---|---|
| 8 | Dongchuan | 3 | 5152 | 57 | 2 | 1 | 2 |   |
| 8 | Dongchuan | 3 | 5153 | 57 | 2 | 1 | 2 |   |
| 8 | Dongchuan | 3 | 5154 | 47 | 2 | 1 | 2 |   |
| 8 | Dongchuan | 3 | 5155 | 73 | 3 | 2 | 2 |   |
| 8 | Dongchuan | 3 | 5156 | 63 | 2 | 2 | 2 |   |
| 8 | Dongchuan | 3 | 5157 | 42 | 2 | 2 | 2 |   |
| 8 | Dongchuan | 3 | 5158 | 24 | 2 | 1 | 2 |   |
| 8 | Dongchuan | 3 | 5159 | 29 | 2 | 2 | 2 |   |
| 8 | Dongchuan | 3 | 5160 | 60 | 2 | 1 | 2 |   |
| 8 | Dongchuan | 3 | 5161 | 60 | 2 | 1 | 2 |   |
| 8 | Dongchuan | 3 | 5162 | 52 | 2 | 2 | 2 |   |
| 8 | Dongchuan | 3 | 5163 | 49 | 2 | 1 | 2 |   |
| 8 | Dongchuan | 3 | 5164 | 54 | 2 | 2 | 2 |   |
| 8 | Dongchuan | 3 | 5165 | 31 | 2 | 1 | 2 |   |
| 8 | Dongchuan | 3 | 5166 | 68 | 3 | 1 | 2 |   |
| 8 | Dongchuan | 3 | 5167 | 33 | 2 | 1 | 2 |   |
| 8 | Dongchuan | 3 | 5168 | 59 | 2 | 2 | 2 |   |
| 8 | Dongchuan | 3 | 5169 | 42 | 2 | 1 | 2 |   |
| 8 | Dongchuan | 3 | 5170 | 15 | 2 | 1 | 2 |   |
| 8 | Dongchuan | 3 | 5171 | 17 | 2 | 1 | 2 |   |
| 8 | Dongchuan | 3 | 5172 | 46 | 2 | 2 | 2 |   |
| 8 | Dongchuan | 3 | 5173 | 71 | 3 | 1 | 2 |   |
| 8 | Dongchuan | 3 | 5174 | 50 | 2 | 1 | 2 |   |
| 8 | Dongchuan | 3 | 5175 | 66 | 3 | 1 | 2 |   |
| 8 | Dongchuan | 3 | 5176 | 40 | 2 | 2 | 2 |   |
| 8 | Dongchuan | 3 | 5177 | 58 | 2 | 1 | 2 |   |
| 8 | Dongchuan | 3 | 5178 | 82 | 3 | 2 | 2 |   |
| 8 | Dongchuan | 3 | 5179 | 68 | 3 | 2 | 2 |   |
| 8 | Dongchuan | 3 | 5180 | 74 | 3 | 2 | 2 |   |
| 8 | Dongchuan | 3 | 5181 | 82 | 3 | 2 | 2 |   |
| 8 | Dongchuan | 3 | 5182 | 23 | 2 | 1 | 2 |   |
| 8 | Dongchuan | 3 | 5183 | 63 | 2 | 1 | 1 |   |
| 8 | Dongchuan | 3 | 5184 | 57 | 2 | 1 | 1 |   |
| 8 | Dongchuan | 3 | 5185 | 50 | 2 | 1 | 1 |   |
| 9 | Jiangshan | 1 | 5186 | 75 | 3 | 1 | 1 | 1 |
| 9 | Jiangshan | 1 | 5187 | 66 | 3 | 1 | 1 | 1 |
| 9 | Jiangshan | 1 | 5188 | 19 | 2 | 2 | 1 | 1 |
| 9 | Jiangshan | 1 | 5189 | 42 | 2 | 2 | 1 | 1 |
| 9 | Jiangshan | 1 | 5190 | 77 | 3 | 1 | 1 | 1 |
| 9 | Jiangshan | 1 | 5191 | 65 | 3 | 1 | 1 | 1 |
| 9 | Jiangshan | 1 | 5192 | 23 | 2 | 1 | 1 | 1 |
| 9 | Jiangshan | 1 | 5193 | 24 | 2 | 1 | 1 | 1 |
| 9 | Jiangshan | 1 | 5194 | 33 | 2 | 1 | 1 | 1 |
| 9 | Jiangshan | 1 | 5195 | 27 | 2 | 1 | 1 | 1 |
| 9 | Jiangshan | 1 | 5196 | 30 | 2 | 2 | 1 | 1 |
| 9 | Jiangshan | 1 | 5197 | 55 | 2 | 2 | 1 | 1 |
| 9 | Jiangshan | 1 | 5198 | 48 | 2 | 1 | 1 | 1 |
| 9 | Jiangshan | 1 | 5199 | 70 | 3 | 1 | 1 | 1 |
| 9 | Jiangshan | 1 | 5200 | 61 | 2 | 1 | 1 | 1 |
| 9 | Jiangshan | 1 | 5201 | 57 | 2 | 1 | 1 | 1 |
| 9 | Jiangshan | 1 | 5202 | 64 | 2 | 1 | 1 |   |
| 9 | Jiangshan | 1 | 5203 | 52 | 2 | 1 | 1 | 1 |
| 9 | Jiangshan | 1 | 5204 | 21 | 2 | 2 | 1 | 1 |
| 9 | Jiangshan | 1 | 5205 | 50 | 2 | 1 | 1 | 1 |

|   |           |   |      |    |   |   |   |   |
|---|-----------|---|------|----|---|---|---|---|
| 9 | Jiangshan | 1 | 5206 | 82 | 3 | 1 | 1 | 1 |
| 9 | Jiangshan | 1 | 5207 | 71 | 3 | 1 | 1 | 1 |
| 9 | Jiangshan | 1 | 5208 | 21 | 2 | 1 | 1 | 1 |
| 9 | Jiangshan | 1 | 5209 | 30 | 2 | 2 |   | 1 |
| 9 | Jiangshan | 1 | 5210 | 27 | 2 | 2 | 1 | 1 |
| 9 | Jiangshan | 1 | 5211 | 74 | 3 | 1 | 1 | 1 |
| 9 | Jiangshan | 1 | 5212 | 19 | 2 | 1 | 1 |   |
| 9 | Jiangshan | 1 | 5213 | 60 | 2 | 1 | 1 | 1 |
| 9 | Jiangshan | 1 | 5214 | 64 | 2 | 1 | 1 | 1 |
| 9 | Jiangshan | 1 | 5215 | 31 | 2 | 2 | 1 |   |
| 9 | Jiangshan | 1 | 5216 | 65 | 3 | 1 | 1 |   |
| 9 | Jiangshan | 1 | 5217 | 56 | 2 | 1 | 1 | 1 |
| 9 | Jiangshan | 1 | 5218 | 23 | 2 | 1 | 1 | 1 |
| 9 | Jiangshan | 1 | 5219 | 84 | 3 | 2 | 1 |   |
| 9 | Jiangshan | 1 | 5220 | 41 | 2 | 2 | 1 | 1 |
| 9 | Jiangshan | 1 | 5221 | 42 | 2 | 2 | 1 | 1 |
| 9 | Jiangshan | 1 | 5222 | 67 | 3 | 2 | 1 | 1 |
| 9 | Jiangshan | 1 | 5223 | 70 | 3 | 1 | 1 | 1 |
| 9 | Jiangshan | 1 | 5224 | 82 | 3 | 1 | 1 | 1 |
| 9 | Jiangshan | 1 | 5225 | 62 | 2 | 2 | 1 | 1 |
| 9 | Jiangshan | 1 | 5226 | 65 | 3 | 1 | 1 | 1 |
| 9 | Jiangshan | 1 | 5227 | 22 | 2 | 1 |   | 1 |
| 9 | Jiangshan | 1 | 5228 | 58 | 2 | 1 | 1 | 1 |
| 9 | Jiangshan | 1 | 5229 | 26 | 2 | 2 | 1 |   |
| 9 | Jiangshan | 1 | 5230 | 50 | 2 | 1 | 1 | 1 |
| 9 | Jiangshan | 1 | 5231 | 61 | 2 | 1 | 1 | 1 |
| 9 | Jiangshan | 1 | 5232 | 57 | 2 | 2 | 1 |   |
| 9 | Jiangshan | 1 | 5233 | 45 | 2 | 2 | 1 |   |
| 9 | Jiangshan | 1 | 5234 | 30 | 2 | 2 | 1 | 1 |
| 9 | Jiangshan | 1 | 5235 | 57 | 2 | 2 |   | 1 |
| 9 | Jiangshan | 1 | 5236 | 26 | 2 | 1 | 1 |   |
| 9 | Jiangshan | 1 | 5237 | 49 | 2 | 1 | 1 | 1 |
| 9 | Jiangshan | 1 | 5238 | 55 | 2 | 1 | 1 | 1 |
| 9 | Jiangshan | 1 | 5239 | 50 | 2 | 1 | 1 | 1 |
| 9 | Jiangshan | 1 | 5240 | 44 | 2 | 1 | 1 | 1 |
| 9 | Jiangshan | 1 | 5241 | 78 | 3 | 1 | 1 | 1 |
| 9 | Jiangshan | 1 | 5242 | 69 | 3 | 1 | 1 | 1 |
| 9 | Jiangshan | 1 | 5243 | 62 | 2 | 2 | 1 | 1 |
| 9 | Jiangshan | 1 | 5244 | 87 | 3 | 1 | 1 |   |
| 9 | Jiangshan | 1 | 5245 | 68 | 3 | 1 | 1 | 1 |
| 9 | Jiangshan | 1 | 5246 | 78 | 3 | 1 | 1 | 1 |
| 9 | Jiangshan | 1 | 5247 | 70 | 3 | 1 | 1 | 1 |
| 9 | Jiangshan | 1 | 5248 | 22 | 2 | 1 | 1 | 1 |
| 9 | Jiangshan | 1 | 5249 | 66 | 3 | 1 | 1 | 1 |
| 9 | Jiangshan | 1 | 5250 | 51 | 2 | 1 | 1 | 1 |
| 9 | Jiangshan | 1 | 5251 | 52 | 2 | 1 | 1 | 1 |
| 9 | Jiangshan | 1 | 5252 | 70 | 3 | 1 | 1 | 1 |
| 9 | Jiangshan | 1 | 5253 | 68 | 3 | 1 | 1 | 1 |
| 9 | Jiangshan | 1 | 5254 | 72 | 3 | 1 | 1 | 1 |
| 9 | Jiangshan | 1 | 5255 | 79 | 3 | 1 | 1 | 1 |
| 9 | Jiangshan | 1 | 5256 | 56 | 2 | 2 | 1 | 1 |
| 9 | Jiangshan | 1 | 5257 | 31 | 2 | 1 | 1 | 1 |
| 9 | Jiangshan | 1 | 5258 | 80 | 3 | 2 | 1 | 1 |
| 9 | Jiangshan | 1 | 5259 | 61 | 2 | 1 | 1 | 1 |

|   |           |   |      |    |   |   |   |   |
|---|-----------|---|------|----|---|---|---|---|
| 9 | Jiangshan | 1 | 5260 | 53 | 2 | 2 | 1 | 1 |
| 9 | Jiangshan | 1 | 5261 | 60 | 2 | 1 | 1 | 1 |
| 9 | Jiangshan | 1 | 5262 | 17 | 2 | 1 | 1 | 1 |
| 9 | Jiangshan | 1 | 5263 | 70 | 3 | 1 | 1 | 1 |
| 9 | Jiangshan | 1 | 5264 | 72 | 3 | 1 | 1 | 1 |
| 9 | Jiangshan | 1 | 5265 | 32 | 2 | 1 | 1 | 1 |
| 9 | Jiangshan | 1 | 5266 | 75 | 3 | 1 | 1 |   |
| 9 | Jiangshan | 1 | 5267 | 88 | 3 | 1 | 1 | 1 |
| 9 | Jiangshan | 1 | 5268 | 69 | 3 | 1 | 1 | 1 |
| 9 | Jiangshan | 1 | 5269 | 64 | 2 | 2 | 1 | 1 |
| 9 | Jiangshan | 1 | 5270 | 68 | 3 | 2 | 1 | 1 |
| 9 | Jiangshan | 1 | 5271 | 77 | 3 | 1 | 1 | 1 |
| 9 | Jiangshan | 1 | 5272 | 63 | 2 | 1 | 1 |   |
| 9 | Jiangshan | 1 | 5273 | 73 | 3 | 2 | 1 | 1 |
| 9 | Jiangshan | 1 | 5274 | 49 | 2 | 1 | 1 | 1 |
| 9 | Jiangshan | 1 | 5275 | 77 | 3 | 1 | 1 | 1 |
| 9 | Jiangshan | 1 | 5276 | 23 | 2 | 1 | 1 | 1 |
| 9 | Jiangshan | 1 | 5277 | 24 | 2 | 1 | 1 | 1 |
| 9 | Jiangshan | 1 | 5278 | 60 | 2 | 1 | 1 | 1 |
| 9 | Jiangshan | 1 | 5279 | 20 | 2 | 2 | 1 |   |
| 9 | Jiangshan | 1 | 5280 | 27 | 2 | 2 | 1 | 1 |
| 9 | Jiangshan | 1 | 5281 | 58 | 2 | 1 | 1 | 1 |
| 9 | Jiangshan | 1 | 5282 | 54 | 2 | 2 | 1 | 1 |
| 9 | Jiangshan | 1 | 5283 | 25 | 2 | 2 | 1 |   |
| 9 | Jiangshan | 1 | 5284 | 58 | 2 | 1 | 1 | 1 |
| 9 | Jiangshan | 1 | 5285 | 67 | 3 | 1 | 1 | 1 |
| 9 | Jiangshan | 1 | 5286 | 27 | 2 | 1 | 1 |   |
| 9 | Jiangshan | 1 | 5287 | 75 | 3 | 1 | 1 | 1 |
| 9 | Jiangshan | 1 | 5288 | 80 | 3 | 1 | 1 | 1 |
| 9 | Jiangshan | 1 | 5289 | 68 | 3 | 1 | 1 | 1 |
| 9 | Jiangshan | 1 | 5290 | 76 | 3 | 1 | 1 | 1 |
| 9 | Jiangshan | 1 | 5291 | 33 | 2 | 2 | 1 |   |
| 9 | Jiangshan | 1 | 5292 | 45 | 2 | 1 | 1 | 1 |
| 9 | Jiangshan | 1 | 5293 | 85 | 3 | 1 | 1 |   |
| 9 | Jiangshan | 1 | 5294 | 71 | 3 | 1 |   | 1 |
| 9 | Jiangshan | 1 | 5295 | 51 | 2 | 1 | 1 | 1 |
| 9 | Jiangshan | 1 | 5296 | 35 | 2 | 1 | 1 | 1 |
| 9 | Jiangshan | 1 | 5297 | 23 | 2 | 1 | 1 | 1 |
| 9 | Jiangshan | 1 | 5298 | 66 | 3 | 1 | 1 | 1 |
| 9 | Jiangshan | 1 | 5299 | 64 | 2 | 1 | 1 | 1 |
| 9 | Jiangshan | 1 | 5300 | 64 | 2 | 1 | 1 | 1 |
| 9 | Jiangshan | 1 | 5301 | 58 | 2 | 1 | 1 | 1 |
| 9 | Jiangshan | 1 | 5302 | 67 | 3 | 1 | 1 | 1 |
| 9 | Jiangshan | 1 | 5303 | 19 | 2 | 1 | 1 |   |
| 9 | Jiangshan | 1 | 5304 | 63 | 2 | 2 | 1 | 1 |
| 9 | Jiangshan | 1 | 5305 | 68 | 3 | 1 |   | 1 |
| 9 | Jiangshan | 1 | 5306 | 67 | 3 | 2 |   | 1 |
| 9 | Jiangshan | 1 | 5307 | 26 | 2 | 1 | 1 | 1 |
| 9 | Jiangshan | 1 | 5308 | 24 | 2 | 2 |   | 1 |
| 9 | Jiangshan | 1 | 5309 | 21 | 2 | 1 | 1 | 1 |
| 9 | Jiangshan | 1 | 5310 | 38 | 2 | 2 | 1 |   |
| 9 | Jiangshan | 1 | 5311 | 41 | 2 | 1 | 1 | 1 |
| 9 | Jiangshan | 1 | 5312 | 78 | 3 | 1 | 1 |   |
| 9 | Jiangshan | 1 | 5313 | 78 | 3 | 1 |   | 1 |

|   |           |   |      |    |   |   |   |   |
|---|-----------|---|------|----|---|---|---|---|
| 9 | Jiangshan | 1 | 5314 | 67 | 3 | 1 | 1 | 1 |
| 9 | Jiangshan | 1 | 5315 | 82 | 3 | 2 | 1 | 1 |
| 9 | Jiangshan | 1 | 5316 | 47 | 2 | 1 | 1 | 1 |
| 9 | Jiangshan | 1 | 5317 | 29 | 2 | 1 | 1 | 1 |
| 9 | Jiangshan | 1 | 5318 | 53 | 2 | 1 | 1 | 1 |
| 9 | Jiangshan | 1 | 5319 | 36 | 2 | 1 | 1 | 1 |
| 9 | Jiangshan | 1 | 5320 | 39 | 2 | 2 | 1 |   |
| 9 | Jiangshan | 1 | 5321 | 45 | 2 | 1 | 1 | 1 |
| 9 | Jiangshan | 1 | 5322 | 46 | 2 | 1 | 1 | 1 |
| 9 | Jiangshan | 1 | 5323 | 65 | 3 | 1 | 1 | 1 |
| 9 | Jiangshan | 1 | 5324 | 68 | 3 | 1 | 1 | 1 |
| 9 | Jiangshan | 1 | 5325 | 33 | 2 | 1 | 1 | 1 |
| 9 | Jiangshan | 1 | 5326 | 90 | 3 | 2 | 1 | 1 |
| 9 | Jiangshan | 1 | 5327 | 79 | 3 | 1 | 1 | 1 |
| 9 | Jiangshan | 1 | 5328 | 36 | 2 | 1 | 1 | 1 |
| 9 | Jiangshan | 1 | 5329 | 64 | 2 | 2 | 1 | 1 |
| 9 | Jiangshan | 1 | 5330 | 66 | 3 | 1 | 1 | 1 |
| 9 | Jiangshan | 1 | 5331 | 82 | 3 | 1 | 1 | 1 |
| 9 | Jiangshan | 1 | 5332 | 22 | 2 | 2 | 1 | 1 |
| 9 | Jiangshan | 1 | 5333 | 21 | 2 | 1 | 1 |   |
| 9 | Jiangshan | 1 | 5334 | 62 | 2 | 1 | 1 | 1 |
| 9 | Jiangshan | 1 | 5335 | 59 | 2 | 1 | 1 | 1 |
| 9 | Jiangshan | 1 | 5336 | 46 | 2 | 1 | 1 | 1 |
| 9 | Jiangshan | 1 | 5337 | 55 | 2 | 2 | 1 | 1 |
| 9 | Jiangshan | 1 | 5338 | 50 | 2 | 1 | 1 | 1 |
| 9 | Jiangshan | 1 | 5339 | 80 | 3 | 2 | 1 | 1 |
| 9 | Jiangshan | 1 | 5340 | 82 | 3 | 2 | 1 | 1 |
| 9 | Jiangshan | 1 | 5341 | 65 | 3 | 1 | 1 | 1 |
| 9 | Jiangshan | 1 | 5342 | 60 | 2 | 1 | 1 | 1 |
| 9 | Jiangshan | 1 | 5343 | 66 | 3 | 1 | 1 | 1 |
| 9 | Jiangshan | 1 | 5344 | 74 | 3 | 1 | 1 | 1 |
| 9 | Jiangshan | 1 | 5345 | 19 | 2 | 1 | 1 | 1 |
| 9 | Jiangshan | 1 | 5346 | 66 | 3 | 1 | 1 | 1 |
| 9 | Jiangshan | 1 | 5347 | 71 | 3 | 1 | 1 | 1 |
| 9 | Jiangshan | 1 | 5348 | 67 | 3 | 1 | 1 | 1 |
| 9 | Jiangshan | 1 | 5349 | 27 | 2 | 2 | 1 | 1 |
| 9 | Jiangshan | 1 | 5350 | 51 | 2 | 2 | 1 | 1 |
| 9 | Jiangshan | 1 | 5351 | 82 | 3 | 2 | 1 | 1 |
| 9 | Jiangshan | 1 | 5352 | 58 | 2 | 1 | 1 | 1 |
| 9 | Jiangshan | 1 | 5353 | 28 | 2 | 1 | 1 | 1 |
| 9 | Jiangshan | 1 | 5354 | 36 | 2 | 2 | 1 | 1 |
| 9 | Jiangshan | 1 | 5355 | 75 | 3 | 1 | 1 | 1 |
| 9 | Jiangshan | 1 | 5356 | 46 | 2 | 1 | 1 |   |
| 9 | Jiangshan | 1 | 5357 | 51 | 2 | 2 | 1 | 1 |
| 9 | Jiangshan | 1 | 5358 | 68 | 3 | 1 | 1 | 1 |
| 9 | Jiangshan | 1 | 5359 | 51 | 2 | 1 | 1 |   |
| 9 | Jiangshan | 1 | 5360 | 71 | 3 | 1 | 1 |   |
| 9 | Jiangshan | 1 | 5361 | 62 | 2 | 1 | 1 | 1 |
| 9 | Jiangshan | 1 | 5362 | 82 | 3 | 1 | 1 | 1 |
| 9 | Jiangshan | 1 | 5363 | 23 | 2 | 1 | 1 |   |
| 9 | Jiangshan | 1 | 5364 | 58 | 2 | 1 | 1 | 1 |
| 9 | Jiangshan | 1 | 5365 | 29 | 2 | 1 | 1 | 1 |
| 9 | Jiangshan | 1 | 5366 | 41 | 2 | 1 | 1 | 1 |
| 9 | Jiangshan | 1 | 5367 | 81 | 3 | 1 | 1 | 1 |

|   |           |   |      |    |   |   |   |   |
|---|-----------|---|------|----|---|---|---|---|
| 9 | Jiangshan | 1 | 5368 | 61 | 2 | 2 | 1 | 1 |
| 9 | Jiangshan | 1 | 5369 | 56 | 2 | 1 | 1 | 1 |
| 9 | Jiangshan | 1 | 5370 | 66 | 3 | 1 | 1 | 1 |
| 9 | Jiangshan | 1 | 5371 | 66 | 3 | 2 | 1 | 1 |
| 9 | Jiangshan | 1 | 5372 | 46 | 2 | 1 | 1 | 1 |
| 9 | Jiangshan | 1 | 5373 | 25 | 2 | 1 | 1 | 1 |
| 9 | Jiangshan | 1 | 5374 | 48 | 2 | 1 | 1 |   |
| 9 | Jiangshan | 1 | 5375 | 77 | 3 | 2 | 1 | 1 |
| 9 | Jiangshan | 1 | 5376 | 34 | 2 | 2 | 1 | 1 |
| 9 | Jiangshan | 1 | 5377 | 51 | 2 | 1 | 1 | 1 |
| 9 | Jiangshan | 1 | 5378 | 35 | 2 | 2 | 1 | 1 |
| 9 | Jiangshan | 1 | 5379 | 32 | 2 | 1 | 1 | 1 |
| 9 | Jiangshan | 1 | 5380 | 62 | 2 | 2 | 1 | 1 |
| 9 | Jiangshan | 1 | 5381 | 82 | 3 | 2 | 1 | 1 |
| 9 | Jiangshan | 1 | 5382 | 63 | 2 | 1 | 1 | 1 |
| 9 | Jiangshan | 1 | 5383 | 66 | 3 | 1 | 1 | 1 |
| 9 | Jiangshan | 1 | 5384 | 19 | 2 | 2 | 1 | 1 |
| 9 | Jiangshan | 1 | 5385 | 61 | 2 | 2 | 1 | 1 |
| 9 | Jiangshan | 1 | 5386 | 70 | 3 | 1 | 1 | 1 |
| 9 | Jiangshan | 1 | 5387 | 61 | 2 | 1 | 1 | 1 |
| 9 | Jiangshan | 1 | 5388 | 81 | 3 | 1 | 1 | 1 |
| 9 | Jiangshan | 1 | 5389 | 70 | 3 | 1 | 1 | 1 |
| 9 | Jiangshan | 1 | 5390 | 51 | 2 | 1 | 1 | 1 |
| 9 | Jiangshan | 1 | 5391 | 92 | 3 | 1 | 1 | 1 |
| 9 | Jiangshan | 1 | 5392 | 61 | 2 | 1 | 1 | 1 |
| 9 | Jiangshan | 1 | 5393 | 31 | 2 | 2 | 1 | 1 |
| 9 | Jiangshan | 1 | 5394 | 63 | 2 | 1 | 1 | 1 |
| 9 | Jiangshan | 1 | 5395 | 52 | 2 | 1 |   | 1 |
| 9 | Jiangshan | 1 | 5396 | 65 | 3 | 1 | 1 | 1 |
| 9 | Jiangshan | 1 | 5397 | 79 | 3 | 1 | 1 | 1 |
| 9 | Jiangshan | 1 | 5398 | 72 | 3 | 1 | 1 | 1 |
| 9 | Jiangshan | 1 | 5399 | 48 | 2 | 1 | 1 | 1 |
| 9 | Jiangshan | 1 | 5400 | 57 | 2 | 1 | 1 | 1 |
| 9 | Jiangshan | 1 | 5401 | 84 | 3 | 1 | 1 | 1 |
| 9 | Jiangshan | 1 | 5402 | 43 | 2 | 1 | 1 | 1 |
| 9 | Jiangshan | 1 | 5403 | 49 | 2 | 1 | 1 | 1 |
| 9 | Jiangshan | 1 | 5404 | 42 | 2 | 1 | 1 |   |
| 9 | Jiangshan | 1 | 5405 | 24 | 2 | 1 | 1 | 1 |
| 9 | Jiangshan | 1 | 5406 | 20 | 2 | 2 | 1 |   |
| 9 | Jiangshan | 1 | 5407 | 82 | 3 | 2 | 1 | 1 |
| 9 | Jiangshan | 1 | 5408 | 22 | 2 | 2 | 1 | 1 |
| 9 | Jiangshan | 1 | 5409 | 75 | 3 | 1 | 1 | 1 |
| 9 | Jiangshan | 1 | 5410 | 75 | 3 | 1 | 1 | 1 |
| 9 | Jiangshan | 1 | 5411 | 68 | 3 | 1 | 1 | 1 |
| 9 | Jiangshan | 1 | 5412 | 70 | 3 | 1 | 1 | 1 |
| 9 | Jiangshan | 1 | 5413 | 85 | 3 | 1 | 1 | 1 |
| 9 | Jiangshan | 1 | 5414 | 57 | 2 | 1 | 1 | 1 |
| 9 | Jiangshan | 1 | 5415 | 63 | 2 | 2 | 1 | 1 |
| 9 | Jiangshan | 1 | 5416 | 59 | 2 | 1 | 1 | 1 |
| 9 | Jiangshan | 1 | 5417 | 23 | 2 | 1 | 1 | 1 |
| 9 | Jiangshan | 1 | 5418 | 64 | 2 | 2 | 1 | 1 |
| 9 | Jiangshan | 1 | 5419 | 32 | 2 | 2 | 1 | 1 |
| 9 | Jiangshan | 1 | 5420 | 51 | 2 | 2 | 1 |   |
| 9 | Jiangshan | 1 | 5421 | 67 | 3 | 2 | 1 | 1 |

|   |           |   |      |    |   |   |   |   |
|---|-----------|---|------|----|---|---|---|---|
| 9 | Jiangshan | 1 | 5422 | 83 | 3 | 1 | 1 | 1 |
| 9 | Jiangshan | 1 | 5423 | 58 | 2 | 2 | 1 | 1 |
| 9 | Jiangshan | 1 | 5424 | 41 | 2 | 1 | 1 | 1 |
| 9 | Jiangshan | 1 | 5425 | 56 | 2 | 2 | 1 | 1 |
| 9 | Jiangshan | 1 | 5426 | 81 | 3 | 1 | 1 | 1 |
| 9 | Jiangshan | 1 | 5427 | 59 | 2 | 1 | 1 | 1 |
| 9 | Jiangshan | 1 | 5428 | 79 | 3 | 2 | 1 | 1 |
| 9 | Jiangshan | 1 | 5429 | 77 | 3 | 1 | 1 | 1 |
| 9 | Jiangshan | 1 | 5430 | 35 | 2 | 1 | 1 | 1 |
| 9 | Jiangshan | 1 | 5431 | 39 | 2 | 1 | 1 | 1 |
| 9 | Jiangshan | 1 | 5432 | 44 | 2 | 2 | 1 | 1 |
| 9 | Jiangshan | 1 | 5433 | 50 | 2 | 1 | 1 | 1 |
| 9 | Jiangshan | 1 | 5434 | 60 | 2 | 2 | 1 | 1 |
| 9 | Jiangshan | 1 | 5435 | 87 | 3 | 2 | 1 |   |
| 9 | Jiangshan | 1 | 5436 | 81 | 3 | 1 |   | 1 |
| 9 | Jiangshan | 1 | 5437 | 62 | 2 | 1 | 1 | 1 |
| 9 | Jiangshan | 1 | 5438 | 26 | 2 | 1 | 1 | 1 |
| 9 | Jiangshan | 1 | 5439 | 52 | 2 | 2 | 1 | 1 |
| 9 | Jiangshan | 1 | 5440 | 19 | 2 | 2 | 1 | 1 |
| 9 | Jiangshan | 1 | 5441 | 33 | 2 | 1 | 1 |   |
| 9 | Jiangshan | 1 | 5442 | 44 | 2 | 1 | 1 | 1 |
| 9 | Jiangshan | 1 | 5443 | 71 | 3 | 1 | 1 | 1 |
| 9 | Jiangshan | 1 | 5444 | 76 | 3 | 1 | 1 |   |
| 9 | Jiangshan | 1 | 5445 | 79 | 3 | 1 | 1 | 1 |
| 9 | Jiangshan | 1 | 5446 | 67 | 3 | 1 | 1 | 1 |
| 9 | Jiangshan | 1 | 5447 | 68 | 3 | 2 | 1 | 1 |
| 9 | Jiangshan | 1 | 5448 | 49 | 2 | 1 | 1 |   |
| 9 | Jiangshan | 1 | 5449 | 76 | 3 | 1 | 1 | 1 |
| 9 | Jiangshan | 1 | 5450 | 66 | 3 | 1 | 1 | 1 |
| 9 | Jiangshan | 1 | 5451 | 76 | 3 | 2 | 1 | 1 |
| 9 | Jiangshan | 1 | 5452 | 76 | 3 | 1 | 1 | 1 |
| 9 | Jiangshan | 1 | 5453 | 57 | 2 | 1 | 1 | 1 |
| 9 | Jiangshan | 1 | 5454 | 46 | 2 | 1 | 1 | 1 |
| 9 | Jiangshan | 1 | 5455 | 63 | 2 | 1 | 1 | 1 |
| 9 | Jiangshan | 1 | 5456 | 63 | 2 | 1 | 1 | 1 |
| 9 | Jiangshan | 1 | 5457 | 68 | 3 | 2 | 1 | 1 |
| 9 | Jiangshan | 1 | 5458 | 73 | 3 | 1 | 1 | 1 |
| 9 | Jiangshan | 1 | 5459 | 18 | 2 | 1 | 1 | 1 |
| 9 | Jiangshan | 1 | 5460 | 47 | 2 | 1 | 1 | 1 |
| 9 | Jiangshan | 1 | 5461 | 76 | 3 | 2 | 1 | 1 |
| 9 | Jiangshan | 1 | 5462 | 47 | 2 | 1 | 1 | 1 |
| 9 | Jiangshan | 1 | 5463 | 59 | 2 | 1 | 1 | 1 |
| 9 | Jiangshan | 1 | 5464 | 81 | 3 | 1 | 1 | 1 |
| 9 | Jiangshan | 1 | 5465 | 84 | 3 | 2 | 1 | 1 |
| 9 | Jiangshan | 1 | 5466 | 41 | 2 | 2 | 1 |   |
| 9 | Jiangshan | 1 | 5467 | 18 | 2 | 1 | 1 | 1 |
| 9 | Jiangshan | 1 | 5468 | 46 | 2 | 2 | 1 | 1 |
| 9 | Jiangshan | 1 | 5469 | 49 | 2 | 2 | 1 | 1 |
| 9 | Jiangshan | 1 | 5470 | 21 | 2 | 2 | 1 |   |
| 9 | Jiangshan | 1 | 5471 | 68 | 3 | 1 | 1 | 1 |
| 9 | Jiangshan | 1 | 5472 | 60 | 2 | 1 | 1 | 1 |
| 9 | Jiangshan | 1 | 5473 | 81 | 3 | 1 | 1 | 1 |
| 9 | Jiangshan | 1 | 5474 | 24 | 2 | 1 |   | 1 |
| 9 | Jiangshan | 1 | 5475 | 47 | 2 | 1 | 1 | 1 |

|   |           |   |      |    |   |   |   |   |
|---|-----------|---|------|----|---|---|---|---|
| 9 | Jiangshan | 1 | 5476 | 63 | 2 | 1 | 1 | 1 |
| 9 | Jiangshan | 1 | 5477 | 65 | 3 | 1 | 1 | 1 |
| 9 | Jiangshan | 1 | 5478 | 32 | 2 | 1 |   | 1 |
| 9 | Jiangshan | 1 | 5479 | 51 | 2 | 2 | 1 |   |
| 9 | Jiangshan | 1 | 5480 | 82 | 3 | 1 | 1 | 1 |
| 9 | Jiangshan | 1 | 5481 | 57 | 2 | 1 | 1 | 1 |
| 9 | Jiangshan | 1 | 5482 | 63 | 2 | 2 | 1 | 1 |
| 9 | Jiangshan | 1 | 5483 | 25 | 2 | 2 |   | 1 |
| 9 | Jiangshan | 1 | 5484 | 19 | 2 | 1 | 1 |   |
| 9 | Jiangshan | 1 | 5485 | 75 | 3 | 1 | 1 |   |
| 9 | Jiangshan | 1 | 5486 | 56 | 2 | 1 |   | 1 |
| 9 | Jiangshan | 1 | 5487 | 52 | 2 | 1 | 1 |   |
| 9 | Jiangshan | 1 | 5488 | 65 | 3 | 2 | 1 | 1 |
| 9 | Jiangshan | 1 | 5489 | 38 | 2 | 1 | 1 |   |
| 9 | Jiangshan | 1 | 5490 | 44 | 2 | 2 | 1 |   |
| 9 | Jiangshan | 1 | 5491 | 19 | 2 | 2 | 1 |   |
| 9 | Jiangshan | 1 | 5492 | 50 | 2 | 1 |   | 1 |
| 9 | Jiangshan | 1 | 5493 | 63 | 2 | 2 | 1 | 1 |
| 9 | Jiangshan | 1 | 5494 | 74 | 3 | 2 | 1 | 1 |
| 9 | Jiangshan | 1 | 5495 | 75 | 3 | 1 | 1 | 1 |
| 9 | Jiangshan | 1 | 5496 | 69 | 3 | 1 |   | 1 |
| 9 | Jiangshan | 1 | 5497 | 26 | 2 | 1 | 1 | 1 |
| 9 | Jiangshan | 1 | 5498 | 81 | 3 | 1 | 1 | 1 |
| 9 | Jiangshan | 1 | 5499 | 67 | 3 | 1 | 1 | 1 |
| 9 | Jiangshan | 1 | 5500 | 70 | 3 | 1 | 1 | 1 |
| 9 | Jiangshan | 1 | 5501 | 99 | 3 | 1 | 1 | 1 |
| 9 | Jiangshan | 1 | 5502 | 18 | 2 | 1 | 1 | 1 |
| 9 | Jiangshan | 1 | 5503 | 86 | 3 | 2 | 1 |   |
| 9 | Jiangshan | 1 | 5504 | 47 | 2 | 1 | 1 | 1 |
| 9 | Jiangshan | 1 | 5505 | 86 | 3 | 2 | 1 |   |
| 9 | Jiangshan | 1 | 5506 | 31 | 2 | 1 | 1 |   |
| 9 | Jiangshan | 1 | 5507 | 59 | 2 | 1 | 1 |   |
| 9 | Jiangshan | 1 | 5508 | 66 | 3 | 1 | 1 | 1 |
| 9 | Jiangshan | 1 | 5509 | 31 | 2 | 2 | 1 | 1 |
| 9 | Jiangshan | 1 | 5510 | 48 | 2 | 2 | 1 | 1 |
| 9 | Jiangshan | 1 | 5511 | 85 | 3 | 2 | 1 | 1 |
| 9 | Jiangshan | 1 | 5512 | 47 | 2 | 1 | 1 | 1 |
| 9 | Jiangshan | 1 | 5513 | 81 | 3 | 1 | 1 | 1 |
| 9 | Jiangshan | 1 | 5514 | 14 | 1 | 1 | 1 |   |
| 9 | Jiangshan | 1 | 5515 | 72 | 3 | 2 | 1 | 1 |
| 9 | Jiangshan | 1 | 5516 | 69 | 3 | 1 | 1 | 1 |
| 9 | Jiangshan | 1 | 5517 | 53 | 2 | 1 | 1 | 1 |
| 9 | Jiangshan | 1 | 5518 | 63 | 2 | 1 | 1 | 1 |
| 9 | Jiangshan | 1 | 5519 | 61 | 2 | 1 | 1 |   |
| 9 | Jiangshan | 1 | 5520 | 62 | 2 | 1 | 1 | 1 |
| 9 | Jiangshan | 1 | 5521 | 47 | 2 | 1 | 1 |   |
| 9 | Jiangshan | 1 | 5522 | 39 | 2 | 1 | 1 | 1 |
| 9 | Jiangshan | 1 | 5523 | 83 | 3 | 2 | 1 | 1 |
| 9 | Jiangshan | 1 | 5524 | 61 | 2 | 1 | 1 | 1 |
| 9 | Jiangshan | 1 | 5525 | 64 | 2 | 1 | 1 | 1 |
| 9 | Jiangshan | 1 | 5526 | 69 | 3 | 2 | 1 | 1 |
| 9 | Jiangshan | 1 | 5527 | 27 | 2 | 1 | 1 | 1 |
| 9 | Jiangshan | 1 | 5528 | 76 | 3 | 2 | 1 | 1 |
| 9 | Jiangshan | 1 | 5529 | 39 | 2 | 1 | 1 | 1 |

|   |           |   |      |    |   |   |   |   |
|---|-----------|---|------|----|---|---|---|---|
| 9 | Jiangshan | 1 | 5530 | 45 | 2 | 1 | 1 | 1 |
| 9 | Jiangshan | 1 | 5531 | 48 | 2 | 1 | 1 | 1 |
| 9 | Jiangshan | 1 | 5532 | 81 | 3 | 1 | 1 | 1 |
| 9 | Jiangshan | 1 | 5533 | 74 | 3 | 1 | 1 | 1 |
| 9 | Jiangshan | 1 | 5534 | 85 | 3 | 1 | 1 |   |
| 9 | Jiangshan | 1 | 5535 | 21 | 2 | 1 | 1 | 1 |
| 9 | Jiangshan | 1 | 5536 | 73 | 3 | 1 | 1 | 1 |
| 9 | Jiangshan | 1 | 5537 | 72 | 3 | 2 | 1 | 1 |
| 9 | Jiangshan | 1 | 5538 | 24 | 2 | 1 | 1 |   |
| 9 | Jiangshan | 1 | 5539 | 74 | 3 | 1 | 1 | 1 |
| 9 | Jiangshan | 1 | 5540 | 28 | 2 | 1 | 1 | 1 |
| 9 | Jiangshan | 1 | 5541 | 67 | 3 | 1 | 1 | 1 |
| 9 | Jiangshan | 1 | 5542 | 61 | 2 | 1 | 1 | 1 |
| 9 | Jiangshan | 1 | 5543 | 50 | 2 | 1 | 1 | 1 |
| 9 | Jiangshan | 1 | 5544 | 87 | 3 | 1 | 1 | 1 |
| 9 | Jiangshan | 1 | 5545 | 49 | 2 | 1 | 1 | 1 |
| 9 | Jiangshan | 1 | 5546 | 51 | 2 | 1 | 1 | 1 |
| 9 | Jiangshan | 1 | 5547 | 66 | 3 | 1 | 1 | 1 |
| 9 | Jiangshan | 1 | 5548 | 31 | 2 | 1 |   | 1 |
| 9 | Jiangshan | 1 | 5549 | 81 | 3 | 1 | 1 | 1 |
| 9 | Jiangshan | 1 | 5550 | 80 | 3 | 1 | 1 |   |
| 9 | Jiangshan | 1 | 5551 | 79 | 3 | 2 | 1 | 1 |
| 9 | Jiangshan | 1 | 5552 | 40 | 2 | 1 | 1 | 1 |
| 9 | Jiangshan | 1 | 5553 | 55 | 2 | 1 | 1 | 1 |
| 9 | Jiangshan | 1 | 5554 | 78 | 3 | 1 |   | 1 |
| 9 | Jiangshan | 1 | 5555 | 62 | 2 | 1 | 1 | 1 |
| 9 | Jiangshan | 1 | 5556 | 79 | 3 | 1 | 1 | 1 |
| 9 | Jiangshan | 1 | 5557 | 59 | 2 | 1 | 1 | 1 |
| 9 | Jiangshan | 1 | 5558 | 62 | 2 | 2 | 1 | 1 |
| 9 | Jiangshan | 1 | 5559 | 73 | 3 | 1 | 1 | 1 |
| 9 | Jiangshan | 1 | 5560 | 63 | 2 | 1 | 1 | 1 |
| 9 | Jiangshan | 1 | 5561 | 45 | 2 | 2 |   | 1 |
| 9 | Jiangshan | 1 | 5562 | 19 | 2 | 2 | 1 |   |
| 9 | Jiangshan | 1 | 5563 | 87 | 3 | 1 | 1 |   |
| 9 | Jiangshan | 1 | 5564 | 85 | 3 | 1 | 1 | 1 |
| 9 | Jiangshan | 1 | 5565 | 43 | 2 | 2 | 1 |   |
| 9 | Jiangshan | 1 | 5566 | 77 | 3 | 1 | 1 | 1 |
| 9 | Jiangshan | 1 | 5567 | 62 | 2 | 1 | 1 | 1 |
| 9 | Jiangshan | 1 | 5568 | 61 | 2 | 2 | 1 | 1 |
| 9 | Jiangshan | 1 | 5569 | 61 | 2 | 1 | 1 | 1 |
| 9 | Jiangshan | 1 | 5570 | 16 | 2 | 2 |   | 1 |
| 9 | Jiangshan | 1 | 5571 | 74 | 3 | 2 | 1 | 1 |
| 9 | Jiangshan | 1 | 5572 | 49 | 2 | 2 |   | 1 |
| 9 | Jiangshan | 1 | 5573 | 58 | 2 | 1 | 1 | 1 |
| 9 | Jiangshan | 1 | 5574 | 73 | 3 | 2 | 1 | 1 |
| 9 | Jiangshan | 1 | 5575 | 25 | 2 | 1 | 1 |   |
| 9 | Jiangshan | 1 | 5576 | 71 | 3 | 1 | 1 | 1 |
| 9 | Jiangshan | 1 | 5577 | 90 | 3 | 2 | 1 | 1 |
| 9 | Jiangshan | 1 | 5578 | 69 | 3 | 1 | 1 | 1 |
| 9 | Jiangshan | 1 | 5579 | 20 | 2 | 1 | 1 | 1 |
| 9 | Jiangshan | 1 | 5580 | 41 | 2 | 2 | 1 | 1 |
| 9 | Jiangshan | 1 | 5581 | 85 | 3 | 1 |   | 1 |
| 9 | Jiangshan | 1 | 5582 | 82 | 3 | 1 | 1 | 1 |
| 9 | Jiangshan | 1 | 5583 | 27 | 2 | 2 | 1 | 1 |



|   |           |   |      |    |   |   |   |   |
|---|-----------|---|------|----|---|---|---|---|
| 9 | Jiangshan | 1 | 5584 | 79 | 3 | 2 | 1 | 1 |
| 9 | Jiangshan | 1 | 5585 | 61 | 2 | 1 | 1 | 1 |
| 9 | Jiangshan | 1 | 5586 | 62 | 2 | 1 | 1 | 1 |
| 9 | Jiangshan | 1 | 5587 | 52 | 2 | 1 | 1 | 1 |
| 9 | Jiangshan | 1 | 5588 | 67 | 3 | 2 | 1 | 1 |
| 9 | Jiangshan | 1 | 5589 | 43 | 2 | 2 | 1 | 1 |
| 9 | Jiangshan | 1 | 5590 | 41 | 2 | 1 | 1 | 1 |
| 9 | Jiangshan | 1 | 5591 | 63 | 2 | 2 | 1 |   |
| 9 | Jiangshan | 1 | 5592 | 27 | 2 | 1 | 2 |   |
| 9 | Jiangshan | 1 | 5593 | 72 | 3 | 2 | 2 |   |
| 9 | Jiangshan | 1 | 5594 | 86 | 3 | 2 | 2 |   |
| 9 | Jiangshan | 1 | 5595 | 63 | 2 | 1 | 2 |   |
| 9 | Jiangshan | 1 | 5596 | 17 | 2 | 1 | 1 | 1 |
| 9 | Jiangshan | 1 | 5597 | 58 | 2 | 2 |   | 1 |
| 9 | Jiangshan | 1 | 5598 | 48 | 2 | 2 | 1 |   |
| 9 | Jiangshan | 1 | 5599 | 49 | 2 | 2 | 1 | 1 |
| 9 | Jiangshan | 1 | 5600 | 76 | 3 | 1 | 1 | 1 |
| 9 | Jiangshan | 1 | 5601 | 52 | 2 | 2 | 1 | 1 |
| 9 | Jiangshan | 1 | 5602 | 54 | 2 | 2 |   | 1 |
| 9 | Jiangshan | 1 | 5603 | 61 | 2 | 1 | 1 | 1 |
| 9 | Jiangshan | 1 | 5604 | 25 | 2 | 2 | 1 | 1 |
| 9 | Jiangshan | 1 | 5605 | 59 | 2 | 1 | 1 | 1 |
| 9 | Jiangshan | 1 | 5606 | 49 | 2 | 2 | 1 | 1 |

| recoSYS | tbtype | tbcatt2 | tbcLass2 | regdelay | reg6mo | regdelayc |
|---------|--------|---------|----------|----------|--------|-----------|
| 3       | 1      | 1       | 2        | 2        | 0      | 0         |
| 2       | 1      | 1       | 2        | 1        | 0      | 0         |
| 2       | 1      | 1       | 1        | 1        | 0      | 0         |
| 3       | 1      | 1       | 2        | 9        | 0      | 1         |
| 1       | 1      | 1       | 2        | 2        | 0      | 0         |
| 1       | 1      | 1       | 2        | 1        | 0      | 0         |
| 3       | 1      | 1       | 1        | 3        | 0      | 0         |
| 3       | 1      | 1       | 2        | 14       | 0      | 1         |
| 2       | 1      |         |          |          | 1      |           |
| 1       | 1      | 1       | 2        | 86       | 0      | 1         |
| 1       | 1      | 1       | 1        | 0        | 0      | 0         |
| 3       | 1      | 1       | 1        | 46       | 0      | 1         |
| 3       | 1      | 1       | 2        | 6        | 0      | 0         |
| 1       | 1      | 1       | 2        | 0        | 0      | 0         |
| 2       | 1      | 1       | 2        | 3        | 0      | 0         |
| 2       | 1      | 1       | 2        | 1        | 0      | 0         |
| 3       | 1      | 1       | 2        | 5        | 0      | 0         |
| 2       | 1      | 1       | 2        | 7        | 0      | 0         |
| 1       | 1      | 1       | 2        | 13       | 0      | 1         |
| 3       | 1      | 1       | 2        | 12       | 0      | 1         |
| 3       | 1      | 1       | 2        | 3        | 0      | 0         |

|   |   |   |   |     |   |   |
|---|---|---|---|-----|---|---|
| 3 | 1 | 1 | 2 | 4   | 0 | 0 |
| 3 | 1 | 1 | 2 | 17  | 0 | 1 |
| 2 | 2 | 1 | 3 | 1   | 0 | 0 |
| 3 | 1 | 1 | 2 | 17  | 0 | 1 |
| 2 | 1 | 1 | 2 | 1   | 0 | 0 |
| 1 | 1 | 1 | 1 | 7   | 0 | 0 |
| 1 | 1 | 1 | 2 | 2   | 0 | 0 |
| 3 | 1 | 1 | 2 | 10  | 0 | 1 |
| 1 | 1 | 1 | 2 | 91  | 0 | 1 |
| 1 | 1 |   |   |     | 1 |   |
| 3 | 1 | 1 | 2 | 1   | 0 | 0 |
| 1 | 1 |   |   |     | 1 |   |
| 1 | 1 |   |   |     | 1 |   |
| 2 | 1 | 1 | 2 | 51  | 0 | 1 |
| 2 | 1 |   |   |     | 1 |   |
| 2 | 1 | 1 | 1 | 1   | 0 | 0 |
| 1 | 1 | 1 | 2 | 1   | 0 | 0 |
| 3 | 1 | 1 | 1 | 17  | 0 | 1 |
| 1 | 1 | 1 | 2 | 1   | 0 | 0 |
| 3 | 1 | 1 | 2 | 3   | 0 | 0 |
| 1 | 1 |   |   |     | 1 |   |
| 1 | 2 | 1 | 3 | 1   | 0 | 0 |
| 3 | 1 | 1 | 2 | 33  | 0 | 1 |
| 3 | 1 | 1 | 2 | 1   | 0 | 0 |
| 3 | 1 | 1 | 2 | 6   | 0 | 0 |
| 3 | 1 | 1 | 2 | 7   | 0 | 0 |
| 1 | 1 | 1 | 2 | 1   | 0 | 0 |
| 1 | 1 | 1 | 2 | 48  | 0 | 1 |
| 2 | 1 | 1 | 1 | 7   | 0 | 0 |
| 2 | 1 |   |   |     | 1 |   |
| 3 | 1 | 1 | 2 | 53  | 0 | 1 |
| 3 | 1 | 1 | 1 | 1   | 0 | 0 |
| 2 | 1 |   |   |     | 1 |   |
| 3 | 1 | 1 | 2 | 13  | 0 | 1 |
| 1 | 1 | 1 | 2 | 1   | 0 | 0 |
| 1 | 1 | 2 | 1 | 7   | 0 | 0 |
| 1 | 1 | 1 | 1 | 2   | 0 | 0 |
| 1 | 1 |   |   |     | 1 |   |
| 3 | 1 | 1 | 2 | 5   | 0 | 0 |
| 3 | 1 | 1 | 2 | 0   | 0 | 0 |
| 3 | 1 | 1 | 2 | 1   | 0 | 0 |
| 1 | 2 | 1 | 3 | 0   | 0 | 0 |
| 3 | 1 | 1 | 1 | 4   | 0 | 0 |
| 1 | 1 | 1 | 1 | 1   | 0 | 0 |
| 1 | 1 | 1 | 2 | 7   | 0 | 0 |
| 3 | 1 | 1 | 2 | 203 | 1 |   |
| 1 | 1 | 2 | 1 | 2   | 0 | 0 |
| 2 | 1 | 1 | 2 | 1   | 0 | 0 |
| 3 | 1 | 1 | 2 | 10  | 0 | 1 |
| 3 | 1 | 1 | 1 | 6   | 0 | 0 |
| 3 | 1 | 1 | 2 | 1   | 0 | 0 |
| 3 | 1 | 1 | 2 | 13  | 0 | 1 |
| 3 | 1 | 1 | 2 | 1   | 0 | 0 |
| 2 | 1 | 1 | 2 | 1   | 0 | 0 |

|   |   |   |   |     |   |   |
|---|---|---|---|-----|---|---|
| 1 | 1 | 1 | 2 | 5   | 0 | 0 |
| 3 | 1 | 1 | 2 | 6   | 0 | 0 |
| 2 | 1 | 1 | 2 | 14  | 0 | 1 |
| 3 | 1 | 1 | 2 | 1   | 0 | 0 |
| 3 | 1 | 1 | 2 | 1   | 0 | 0 |
| 1 | 1 | 1 | 2 | 38  | 0 | 1 |
| 3 | 1 | 1 | 2 | 8   | 0 | 1 |
| 2 | 1 | 1 | 2 | 119 | 0 | 1 |
| 3 | 1 | 1 | 2 | 0   | 0 | 0 |
| 2 | 1 | 1 | 2 | 43  | 0 | 1 |
| 3 | 1 |   |   |     | 1 |   |
| 1 | 1 | 1 | 2 | 4   | 0 | 0 |
| 3 | 1 | 1 | 2 | 40  | 0 | 1 |
| 3 | 1 | 1 | 2 | 4   | 0 | 0 |
| 2 | 1 | 1 | 2 | 1   | 0 | 0 |
| 1 | 1 |   |   |     | 1 |   |
| 3 | 1 | 1 | 2 | 2   | 0 | 0 |
| 1 | 1 |   |   |     | 1 |   |
| 1 | 1 |   |   |     | 1 |   |
| 1 | 1 |   |   |     | 1 |   |
| 3 | 1 | 1 | 1 | 3   | 0 | 0 |
| 3 | 1 | 1 | 1 | 4   | 0 | 0 |
| 1 | 1 | 1 | 2 | 9   | 0 | 1 |
| 1 | 1 | 1 | 2 | 1   | 0 | 0 |
| 3 | 1 | 1 | 2 | 3   | 0 | 0 |
| 3 | 1 | 1 | 1 | 1   | 0 | 0 |
| 3 | 1 | 1 | 1 | 1   | 0 | 0 |
| 3 | 1 | 2 | 1 | 5   | 0 | 0 |
| 3 | 1 | 1 | 2 | 9   | 0 | 1 |
| 1 | 1 | 1 | 2 | 11  | 0 | 1 |
| 2 | 1 | 1 | 2 | 38  | 0 | 1 |
| 1 | 1 | 1 | 2 | 58  | 0 | 1 |
| 3 | 1 | 1 | 2 | 0   | 0 | 0 |
| 1 | 1 |   |   |     | 1 |   |
| 1 | 1 | 1 | 1 | 17  | 0 | 1 |
| 2 | 1 | 1 | 2 | 1   | 0 | 0 |
| 1 | 1 | 1 | 2 | 35  | 0 | 1 |
| 1 | 1 |   |   |     | 1 |   |
| 3 | 1 | 1 | 1 | 5   | 0 | 0 |
| 3 | 1 | 1 | 2 | 3   | 0 | 0 |
| 1 | 1 | 1 | 2 | 1   | 0 | 0 |
| 3 | 1 | 1 | 2 | 1   | 0 | 0 |
| 2 | 1 | 2 | 1 | 1   | 0 | 0 |
| 1 | 1 | 1 | 2 | 8   | 0 | 1 |
| 3 | 1 | 2 | 1 | 9   | 0 | 1 |
| 1 | 1 | 1 | 2 | 104 | 0 | 1 |
| 1 | 1 | 1 | 2 | 7   | 0 | 0 |
| 1 | 1 | 1 | 2 | 8   | 0 | 1 |
| 1 | 1 | 1 | 2 | 1   | 0 | 0 |
| 3 | 1 | 1 | 2 | 3   | 0 | 0 |
| 1 | 1 |   |   |     | 1 |   |
| 3 | 1 | 1 | 2 | 3   | 0 | 0 |
| 3 | 1 |   |   |     | 1 |   |
| 3 | 1 | 1 | 1 | 1   | 0 | 0 |

|   |   |   |   |     |   |   |
|---|---|---|---|-----|---|---|
| 3 | 1 | 1 | 1 | 2   | 0 | 0 |
| 2 | 1 | 1 | 2 | 12  | 0 | 1 |
| 1 | 1 | 2 | 2 | 52  | 0 | 1 |
| 2 | 2 | 1 | 3 | 1   | 0 | 0 |
| 2 | 1 |   |   |     | 1 |   |
| 3 | 1 | 1 | 2 | 2   | 0 | 0 |
| 3 | 1 | 2 | 1 | 135 | 0 | 1 |
| 1 | 1 | 1 | 2 | 4   | 0 | 0 |
| 2 | 1 | 1 | 2 | 34  | 0 | 1 |
| 3 | 1 | 1 | 2 | 1   | 0 | 0 |
| 1 | 1 | 1 | 2 | 25  | 0 | 1 |
| 1 | 1 | 1 | 2 | 2   | 0 | 0 |
| 3 | 1 | 1 | 2 | 14  | 0 | 1 |
| 2 | 1 | 1 | 2 | 0   | 0 | 0 |
| 1 | 1 | 1 | 1 | 10  | 0 | 1 |
| 3 | 1 | 1 | 2 | 1   | 0 | 0 |
| 2 | 1 | 1 | 2 | 1   | 0 | 0 |
| 1 | 1 |   |   |     | 1 |   |
| 3 | 1 | 1 | 2 | 36  | 0 | 1 |
| 3 | 1 | 1 | 2 | 4   | 0 | 0 |
| 3 | 1 | 1 | 2 | 1   | 0 | 0 |
| 3 | 1 | 1 | 2 | 2   | 0 | 0 |
| 1 | 1 | 1 | 2 | 12  | 0 | 1 |
| 1 | 1 | 1 | 2 | 5   | 0 | 0 |
| 1 | 1 |   |   |     | 1 |   |
| 3 | 2 | 1 | 3 | 15  | 0 | 1 |
| 3 | 1 | 1 | 2 | 0   | 0 | 0 |
| 3 | 1 | 1 | 2 | 3   | 0 | 0 |
| 1 | 1 | 1 | 2 | 2   | 0 | 0 |
| 1 | 1 | 1 | 2 | 3   | 0 | 0 |
| 1 | 1 | 1 | 2 | 48  | 0 | 1 |
| 2 | 1 |   |   |     | 1 |   |
| 3 | 1 | 1 | 2 | 1   | 0 | 0 |
| 2 | 1 | 1 | 2 | 1   | 0 | 0 |
| 2 | 1 | 1 | 2 | 3   | 0 | 0 |
| 1 | 1 | 1 | 1 | 15  | 0 | 1 |
| 3 | 2 | 1 | 3 | 1   | 0 | 0 |
| 1 | 1 |   |   |     | 1 |   |
| 1 | 1 | 1 | 1 | 14  | 0 | 1 |
| 3 | 1 | 1 | 2 | 216 | 1 |   |
| 3 | 1 | 2 | 1 | 1   | 0 | 0 |
| 3 | 1 | 1 | 2 | 2   | 0 | 0 |
| 1 | 1 | 1 | 2 | 1   | 0 | 0 |
| 3 | 1 | 1 | 2 | 5   | 0 | 0 |
| 1 | 1 | 1 | 2 | 14  | 0 | 1 |
| 2 | 1 | 1 | 2 | 1   | 0 | 0 |
| 1 | 1 |   |   |     | 1 |   |
| 3 | 1 | 1 | 2 | 24  | 0 | 1 |
| 3 | 1 | 1 | 2 | 1   | 0 | 0 |
| 3 | 1 | 1 | 1 | 2   | 0 | 0 |
| 1 | 1 | 1 | 2 | 7   | 0 | 0 |
| 2 | 1 | 1 | 2 | 138 | 0 | 1 |
| 3 | 1 | 1 | 1 | 3   | 0 | 0 |
| 1 | 1 | 1 | 2 | 5   | 0 | 0 |

|   |   |   |   |     |   |   |
|---|---|---|---|-----|---|---|
| 1 | 1 | 1 | 2 | 48  | 0 | 1 |
| 1 | 1 | 1 | 2 | 3   | 0 | 0 |
| 3 | 1 | 1 | 2 | 25  | 0 | 1 |
| 3 | 1 | 1 | 2 | 1   | 0 | 0 |
| 3 | 1 | 1 | 2 | 111 | 0 | 1 |
| 2 | 1 | 1 | 2 | 38  | 0 | 1 |
| 3 | 1 | 2 | 2 | 19  | 0 | 1 |
| 1 | 1 | 1 | 1 | 2   | 0 | 0 |
| 3 | 1 | 1 | 1 | 1   | 0 | 0 |
| 3 | 1 | 1 | 2 | 18  | 0 | 1 |
| 2 | 1 |   |   |     | 1 |   |
| 3 | 1 | 1 | 2 | 1   | 0 | 0 |
| 3 | 1 | 1 | 2 | 2   | 0 | 0 |
| 1 | 1 | 1 | 2 | 5   | 0 | 0 |
| 3 | 1 | 1 | 1 | 3   | 0 | 0 |
| 2 | 1 | 1 | 2 | 1   | 0 | 0 |
| 3 | 1 | 1 | 2 | 1   | 0 | 0 |
| 1 | 1 | 1 | 1 | 3   | 0 | 0 |
| 1 | 1 |   |   |     | 1 |   |
| 1 | 1 |   |   |     | 1 |   |
| 3 | 1 | 1 | 2 | 8   | 0 | 1 |
| 1 | 1 | 1 | 2 | 21  | 0 | 1 |
| 1 | 1 | 1 | 2 | 2   | 0 | 0 |
| 3 | 1 | 1 | 2 | 1   | 0 | 0 |
| 2 | 1 |   |   |     | 1 |   |
| 3 | 1 | 1 | 2 | 0   | 0 | 0 |
| 3 | 1 | 1 | 1 | 3   | 0 | 0 |
| 3 | 1 | 1 | 1 | 1   | 0 | 0 |
| 1 | 1 | 2 | 1 | 8   | 0 | 1 |
| 1 | 1 | 1 | 2 | 17  | 0 | 1 |
| 3 | 1 |   |   |     | 1 |   |
| 1 | 1 | 1 | 2 | 1   | 0 | 0 |
| 2 | 1 |   |   |     | 1 |   |
| 3 | 1 | 1 | 1 | 5   | 0 | 0 |
| 1 | 1 |   |   |     | 1 |   |
| 2 | 1 | 1 | 2 | 23  | 0 | 1 |
| 1 | 1 | 1 | 1 | 4   | 0 | 0 |
| 1 | 1 |   |   |     | 1 |   |
| 1 | 1 | 1 | 2 | 38  | 0 | 1 |
| 1 | 1 | 2 | 1 | 13  | 0 | 1 |
| 3 | 1 | 1 | 2 | 19  | 0 | 1 |
| 1 | 1 |   |   |     | 1 |   |
| 1 | 1 | 1 | 2 | 1   | 0 | 0 |
| 3 | 1 |   |   |     | 1 |   |
| 3 | 2 | 1 | 3 | 9   | 0 | 1 |
| 1 | 2 |   |   |     | 1 |   |
| 3 | 1 | 1 | 2 | 2   | 0 | 0 |
| 3 | 1 | 1 | 2 | 2   | 0 | 0 |
| 3 | 1 | 1 | 2 | 8   | 0 | 1 |
| 3 | 1 | 1 | 2 | 1   | 0 | 0 |
| 3 | 1 | 1 | 2 | 11  | 0 | 1 |
| 1 | 1 | 1 | 2 | 9   | 0 | 1 |
| 3 | 1 | 1 | 1 | 1   | 0 | 0 |
| 1 | 1 | 1 | 2 | 1   | 0 | 0 |

|   |   |   |   |     |   |   |
|---|---|---|---|-----|---|---|
| 3 | 1 | 2 | 1 | 11  | 0 | 1 |
| 3 | 1 | 1 | 1 | 142 | 0 | 1 |
| 3 | 1 | 1 | 2 | 12  | 0 | 1 |
| 3 | 1 | 1 | 1 | 1   | 0 | 0 |
| 2 | 1 | 1 | 2 | 1   | 0 | 0 |
| 3 | 1 | 2 | 1 | 6   | 0 | 0 |
| 1 | 1 | 1 | 1 | 2   | 0 | 0 |
| 1 | 1 | 1 | 1 | 22  | 0 | 1 |
| 2 | 1 | 1 | 2 | 1   | 0 | 0 |
| 1 | 1 | 1 | 2 | 2   | 0 | 0 |
| 1 | 1 | 1 | 2 | 33  | 0 | 1 |
| 3 | 1 | 1 | 2 | 26  | 0 | 1 |
| 2 | 1 | 1 | 2 | 15  | 0 | 1 |
| 2 | 1 | 1 | 2 | 5   | 0 | 0 |
| 3 | 1 | 1 | 2 | 18  | 0 | 1 |
| 3 | 2 | 1 | 3 | 2   | 0 | 0 |
| 3 | 1 | 1 | 2 | 3   | 0 | 0 |
| 1 | 1 |   |   |     | 1 |   |
| 1 | 1 | 1 | 1 | 1   | 0 | 0 |
| 3 | 1 | 1 | 2 | 39  | 0 | 1 |
| 2 | 1 | 1 | 2 | 8   | 0 | 1 |
| 3 | 1 | 1 | 2 | 19  | 0 | 1 |
| 3 | 1 | 1 | 2 | 3   | 0 | 0 |
| 3 | 1 | 1 | 1 | 19  | 0 | 1 |
| 3 | 1 | 1 | 1 | 1   | 0 | 0 |
| 1 | 1 | 1 | 2 | 33  | 0 | 1 |
| 3 | 1 | 1 | 2 | 8   | 0 | 1 |
| 1 | 1 |   |   |     | 1 |   |
| 3 | 1 |   |   |     | 1 |   |
| 1 | 1 | 1 | 2 | 1   | 0 | 0 |
| 1 | 1 | 1 | 2 | 1   | 0 | 0 |
| 3 | 1 | 1 | 2 | 0   | 0 | 0 |
| 3 | 1 | 1 | 2 | 1   | 0 | 0 |
| 2 | 1 | 1 | 2 | 1   | 0 | 0 |
| 1 | 1 |   |   |     | 1 |   |
| 1 | 1 | 1 | 2 | 41  | 0 | 1 |
| 3 | 1 | 1 | 2 | 76  | 0 | 1 |
| 3 | 1 | 1 | 2 | 1   | 0 | 0 |
| 3 | 1 | 1 | 2 | 49  | 0 | 1 |
| 3 | 1 | 1 | 2 | 16  | 0 | 1 |
| 1 | 1 | 1 | 2 | 3   | 0 | 0 |
| 3 | 1 | 1 | 1 | 5   | 0 | 0 |
| 1 | 1 | 1 | 2 | 3   | 0 | 0 |
| 3 | 2 | 1 | 3 | 10  | 0 | 1 |
| 2 | 1 | 1 | 2 | 37  | 0 | 1 |
| 3 | 1 | 1 | 2 | 1   | 0 | 0 |
| 1 | 1 |   |   |     | 1 |   |
| 2 | 1 | 1 | 2 | 1   | 0 | 0 |
| 2 | 1 | 1 | 1 | 4   | 0 | 0 |
| 1 | 1 | 1 | 1 | 6   | 0 | 0 |
| 3 | 1 | 1 | 2 | 1   | 0 | 0 |
| 2 | 1 | 1 | 2 | 0   | 0 | 0 |
| 1 | 1 | 1 | 1 | 0   | 0 | 0 |
| 3 | 1 | 1 | 2 | 26  | 0 | 1 |

|   |   |   |   |     |   |   |
|---|---|---|---|-----|---|---|
| 3 | 1 | 1 | 2 | 1   | 0 | 0 |
| 2 | 1 | 1 | 1 | 15  | 0 | 1 |
| 3 | 1 | 1 | 2 | 2   | 0 | 0 |
| 1 | 1 | 1 | 2 | 0   | 0 | 0 |
| 1 | 1 | 1 | 2 | 3   | 0 | 0 |
| 1 | 2 |   |   |     | 1 |   |
| 3 | 1 | 2 | 1 | 1   | 0 | 0 |
| 1 | 1 | 1 | 2 | 1   | 0 | 0 |
| 2 | 1 | 1 | 2 | 66  | 0 | 1 |
| 1 | 1 | 1 | 2 | 110 | 0 | 1 |
| 2 | 1 | 1 | 2 | 31  | 0 | 1 |
| 1 | 1 |   |   |     | 1 |   |
| 3 | 1 | 1 | 2 | 3   | 0 | 0 |
| 1 | 1 |   |   |     | 1 |   |
| 1 | 1 |   |   |     | 1 |   |
| 2 | 1 | 1 | 1 | 14  | 0 | 1 |
| 3 | 1 | 1 | 1 | 3   | 0 | 0 |
| 1 | 1 | 1 | 2 | 2   | 0 | 0 |
| 1 | 1 | 1 | 2 | 2   | 0 | 0 |
| 1 | 1 | 1 | 2 | 3   | 0 | 0 |
| 3 | 1 | 1 | 2 | 36  | 0 | 1 |
| 1 | 1 | 1 | 2 | 20  | 0 | 1 |
| 1 | 1 | 1 | 1 | 24  | 0 | 1 |
| 1 | 1 |   |   |     | 1 |   |
| 3 | 1 | 1 | 2 | 0   | 0 | 0 |
| 1 | 1 | 1 | 1 | 2   | 0 | 0 |
| 1 | 1 |   |   |     | 1 |   |
| 1 | 1 | 1 | 2 | 45  | 0 | 1 |
| 2 | 1 | 1 | 2 | 11  | 0 | 1 |
| 3 | 1 | 1 | 2 | 30  | 0 | 1 |
| 1 | 1 | 1 | 2 | 22  | 0 | 1 |
| 2 | 1 | 1 | 2 | 4   | 0 | 0 |
| 3 | 1 | 1 | 2 | 2   | 0 | 0 |
| 1 | 1 |   |   |     | 1 |   |
| 3 | 1 | 1 | 1 | 26  | 0 | 1 |
| 1 | 1 | 1 | 2 | 1   | 0 | 0 |
| 3 | 1 | 1 | 2 | 1   | 0 | 0 |
| 1 | 1 | 1 | 2 | 28  | 0 | 1 |
| 3 | 1 | 1 | 2 | 2   | 0 | 0 |
| 1 | 1 | 1 | 2 | 5   | 0 | 0 |
| 1 | 1 | 1 | 2 | 3   | 0 | 0 |
| 3 | 1 | 1 | 2 | 3   | 0 | 0 |
| 1 | 1 | 1 | 2 | 2   | 0 | 0 |
| 1 | 1 | 1 | 1 | 1   | 0 | 0 |
| 1 | 1 |   |   |     | 1 |   |
| 3 | 1 | 1 | 1 | 3   | 0 | 0 |
| 3 | 1 | 1 | 2 | 3   | 0 | 0 |
| 1 | 1 | 1 | 2 | 1   | 0 | 0 |
| 1 | 2 |   |   |     | 1 |   |
| 2 | 1 | 1 | 1 | 3   | 0 | 0 |
| 1 | 1 | 1 | 2 | 1   | 0 | 0 |
| 3 | 1 | 1 | 1 | 2   | 0 | 0 |
| 3 | 1 | 1 | 2 | 42  | 0 | 1 |
| 1 | 1 | 1 | 2 | 3   | 0 | 0 |



|   |   |   |   |     |   |   |
|---|---|---|---|-----|---|---|
| 1 | 1 | 1 | 2 | 1   | 0 | 0 |
| 3 | 1 | 1 | 2 | 20  | 0 | 1 |
| 1 | 2 |   |   |     | 1 |   |
| 1 | 1 | 1 | 2 | 118 | 0 | 1 |
| 1 | 1 | 1 | 2 | 11  | 0 | 1 |
| 1 | 1 | 1 | 2 | 0   | 0 | 0 |
| 2 | 1 | 1 | 2 | 52  | 0 | 1 |
| 1 | 1 | 1 | 2 | 12  | 0 | 1 |
| 2 | 1 | 1 | 2 | 1   | 0 | 0 |
| 1 | 1 |   |   |     | 1 |   |
| 1 | 1 |   |   |     | 1 |   |
| 3 | 1 | 1 | 2 | 17  | 0 | 1 |
| 1 | 1 | 1 | 2 | 1   | 0 | 0 |
| 1 | 1 | 1 | 2 | 5   | 0 | 0 |
| 3 | 1 | 1 | 2 | 5   | 0 | 0 |
| 1 | 1 | 1 | 2 | 0   | 0 | 0 |
| 1 | 1 | 1 | 2 | 9   | 0 | 1 |
| 1 | 1 | 1 | 2 | 43  | 0 | 1 |
| 3 | 1 | 1 | 2 | 5   | 0 | 0 |
| 2 | 1 | 1 | 2 | 1   | 0 | 0 |
| 3 | 1 | 1 | 2 | 3   | 0 | 0 |
| 1 | 1 | 1 | 2 | 13  | 0 | 1 |
| 2 | 1 | 1 | 2 | 1   | 0 | 0 |
| 1 | 1 | 1 | 2 | 43  | 0 | 1 |
| 1 | 2 | 1 | 3 | 19  | 0 | 1 |
| 1 | 2 | 1 | 3 | 209 | 1 |   |
| 1 | 1 | 2 | 1 | 1   | 0 | 0 |
| 1 | 1 | 1 | 2 | 20  | 0 | 1 |
| 1 | 1 | 1 | 2 | 1   | 0 | 0 |
| 1 | 1 | 1 | 2 | 96  | 0 | 1 |
| 1 | 1 | 1 | 2 | 20  | 0 | 1 |
| 1 | 1 | 1 | 2 | 32  | 0 | 1 |
| 1 | 1 | 1 | 2 | 2   | 0 | 0 |
| 1 | 1 | 1 | 2 | 69  | 0 | 1 |
| 1 | 1 | 1 | 2 | 2   | 0 | 0 |
| 1 | 1 | 1 | 2 | 2   | 0 | 0 |
| 1 | 1 | 1 | 2 | 55  | 0 | 1 |
| 1 | 1 | 1 | 2 | 1   | 0 | 0 |
| 1 | 1 | 1 | 2 | 27  | 0 | 1 |
| 1 | 1 | 1 | 2 | 8   | 0 | 1 |
| 1 | 1 | 1 | 2 | 1   | 0 | 0 |
| 1 | 1 | 1 | 2 | 50  | 0 | 1 |
| 1 | 1 | 1 | 2 | 1   | 0 | 0 |
| 1 | 1 | 1 | 2 | 1   | 0 | 0 |
| 1 | 1 | 1 | 2 | 10  | 0 | 1 |
| 1 | 1 | 2 | 1 | 1   | 0 | 0 |
| 1 | 1 | 1 | 2 | 3   | 0 | 0 |
| 1 | 1 | 1 | 2 | 66  | 0 | 1 |
| 1 | 1 | 1 | 2 | 1   | 0 | 0 |
| 1 | 1 | 2 | 1 | 2   | 0 | 0 |
| 1 | 1 | 1 | 2 | 5   | 0 | 0 |
| 1 | 1 | 1 | 2 | 59  | 0 | 1 |
| 1 | 1 | 1 | 2 | 75  | 0 | 1 |
| 1 | 1 | 1 | 2 | 32  | 0 | 1 |

|   |   |   |   |     |   |   |
|---|---|---|---|-----|---|---|
| 1 | 1 | 1 | 2 | 11  | 0 | 1 |
| 1 | 1 | 1 | 2 | 7   | 0 | 0 |
| 1 | 1 | 1 | 2 | 11  | 0 | 1 |
| 1 | 1 | 1 | 2 | 24  | 0 | 1 |
| 1 | 1 | 1 | 2 | 4   | 0 | 0 |
| 1 | 1 | 1 | 2 | 30  | 0 | 1 |
| 1 | 1 | 1 | 1 | 1   | 0 | 0 |
| 1 | 1 | 1 | 2 | 1   | 0 | 0 |
| 1 | 1 | 1 | 2 | 21  | 0 | 1 |
| 1 | 1 | 1 | 2 | 1   | 0 | 0 |
| 2 | 1 | 1 | 1 | 235 | 1 |   |
| 2 | 1 | 1 | 2 | 155 | 0 | 1 |
| 2 | 1 | 1 | 2 | 119 | 0 | 1 |
| 2 | 1 | 1 | 2 | 190 | 1 |   |
| 2 | 1 | 1 | 1 | 216 | 1 |   |
| 2 | 1 | 1 | 2 | 99  | 0 | 1 |
| 2 | 1 | 1 | 2 | 6   | 0 | 0 |
| 2 | 1 |   |   |     | 1 |   |
| 2 | 1 |   |   |     | 1 |   |
| 2 | 1 | 1 | 2 | 90  | 0 | 1 |
| 2 | 1 | 1 | 2 | 0   | 0 | 0 |
| 2 | 1 | 1 | 1 | 3   | 0 | 0 |
| 2 | 1 | 2 | 2 | 102 | 0 | 1 |
| 3 | 1 | 1 | 2 | 137 | 0 | 1 |
| 2 | 1 | 1 | 1 | 32  | 0 | 1 |
| 2 | 1 | 1 | 2 | 0   | 0 | 0 |
| 2 | 1 | 1 | 2 | 10  | 0 | 1 |
| 2 | 1 | 1 | 2 | 0   | 0 | 0 |
| 2 | 1 | 1 | 1 | 0   | 0 | 0 |
| 2 | 1 | 1 | 2 | 0   | 0 | 0 |
| 2 | 1 | 1 | 2 | 0   | 0 | 0 |
| 2 | 1 | 1 | 2 | 0   | 0 | 0 |
| 2 | 1 | 1 | 1 | 0   | 0 | 0 |
| 2 | 1 | 1 | 2 | 0   | 0 | 0 |
| 2 | 1 | 1 | 1 | 0   | 0 | 0 |
| 2 | 1 | 1 | 2 | 0   | 0 | 0 |
| 1 | 1 | 1 | 2 | 12  | 0 | 1 |
| 1 | 1 | 1 | 2 | 8   | 0 | 1 |
| 3 | 1 | 1 | 2 | 14  | 0 | 1 |
| 2 | 1 |   |   |     | 1 |   |
| 2 | 2 | 2 | 3 | 1   | 0 | 0 |
| 2 | 1 | 1 | 1 | 50  | 0 | 1 |
| 2 | 2 | 1 | 3 | 14  | 0 | 1 |
| 2 | 1 | 1 | 2 | 44  | 0 | 1 |
| 2 | 1 | 1 | 1 | 24  | 0 | 1 |
| 2 | 1 | 1 | 2 | 109 | 0 | 1 |
| 2 | 1 | 1 | 1 | 35  | 0 | 1 |
| 2 | 1 | 2 | 1 | 66  | 0 | 1 |
| 3 | 1 | 1 | 1 | 110 | 0 | 1 |
| 2 | 1 | 1 | 1 | 88  | 0 | 1 |
| 1 | 1 | 1 | 1 | 1   | 0 | 0 |
| 3 | 1 | 1 | 1 | 2   | 0 | 0 |
| 1 | 1 | 1 | 1 | 2   | 0 | 0 |
| 1 | 1 | 1 | 1 | 0   | 0 | 0 |

|   |   |   |   |    |   |   |
|---|---|---|---|----|---|---|
| 1 | 1 | 1 | 1 | 0  | 0 | 0 |
| 1 | 1 | 1 | 2 | 2  | 0 | 0 |
| 1 | 1 | 1 | 2 | 7  | 0 | 0 |
| 1 | 1 | 1 | 2 | 0  | 0 | 0 |
| 1 | 1 | 1 | 2 | 5  | 0 | 0 |
| 1 | 1 | 1 | 2 | 2  | 0 | 0 |
| 1 | 1 | 1 | 2 | 33 | 0 | 1 |
| 1 | 1 | 1 | 2 | 0  | 0 | 0 |
| 1 | 1 | 1 | 2 | 2  | 0 | 0 |
| 1 | 1 | 1 | 2 | 0  | 0 | 0 |
| 1 | 2 | 1 | 3 | 0  | 0 | 0 |
| 1 | 1 | 1 | 2 | 1  | 0 | 0 |
| 1 | 1 |   |   |    | 1 |   |
| 1 | 1 | 1 | 1 | 1  | 0 | 0 |
| 1 | 1 | 1 | 1 | 0  | 0 | 0 |
| 1 | 1 |   |   |    | 1 |   |
| 3 | 1 | 1 | 2 | 3  | 0 | 0 |
| 1 | 1 | 1 | 1 | 5  | 0 | 0 |
| 1 | 1 | 1 | 2 | 6  | 0 | 0 |
| 1 | 1 | 1 | 2 | 10 | 0 | 1 |
| 1 | 1 | 1 | 1 | 11 | 0 | 1 |
| 1 | 1 | 1 | 2 | 0  | 0 | 0 |
| 1 | 1 | 1 | 2 | 0  | 0 | 0 |
| 1 | 1 | 1 | 2 | 2  | 0 | 0 |
| 1 | 1 | 1 | 2 | 3  | 0 | 0 |
| 1 | 1 | 1 | 2 | 0  | 0 | 0 |
| 1 | 1 | 2 | 2 | 0  | 0 | 0 |
| 3 | 1 | 1 | 2 | 2  | 0 | 0 |
| 3 | 1 | 2 | 1 | 0  | 0 | 0 |
| 3 | 1 | 1 | 1 | 2  | 0 | 0 |
| 1 | 1 | 2 | 1 | 3  | 0 | 0 |
| 1 | 1 | 1 | 2 | 2  | 0 | 0 |
| 3 | 1 | 2 | 2 | 0  | 0 | 0 |
| 1 | 1 | 2 | 2 | 2  | 0 | 0 |
| 1 | 1 | 1 | 2 | 0  | 0 | 0 |
| 1 | 1 | 1 | 2 | 3  | 0 | 0 |
| 1 | 1 | 1 | 2 | 4  | 0 | 0 |
| 1 | 1 | 1 | 1 | 3  | 0 | 0 |
| 1 | 1 | 1 | 2 | 3  | 0 | 0 |
| 1 | 1 | 1 | 2 | 2  | 0 | 0 |
| 1 | 1 | 1 | 1 | 1  | 0 | 0 |
| 1 | 1 | 1 | 1 | 0  | 0 | 0 |
| 1 | 1 | 1 | 2 | 1  | 0 | 0 |
| 3 | 2 | 1 | 3 | 2  | 0 | 0 |
| 3 | 1 | 1 | 1 | 0  | 0 | 0 |
| 3 | 1 | 1 | 1 | 0  | 0 | 0 |
| 1 | 1 | 1 | 1 | 2  | 0 | 0 |
| 1 | 1 | 1 | 2 | 0  | 0 | 0 |
| 1 | 2 | 1 | 3 | 5  | 0 | 0 |
| 1 | 1 | 1 | 2 | 3  | 0 | 0 |
| 1 | 1 | 1 | 1 | 0  | 0 | 0 |
| 1 | 1 | 1 | 2 | 1  | 0 | 0 |
| 1 | 1 | 1 | 1 | 0  | 0 | 0 |
| 1 | 1 | 1 | 2 | 3  | 0 | 0 |

|   |   |   |   |    |   |   |
|---|---|---|---|----|---|---|
| 1 | 2 | 1 | 3 | 1  | 0 | 0 |
| 1 | 1 | 1 | 1 | 3  | 0 | 0 |
| 1 | 1 | 1 | 2 | 2  | 0 | 0 |
| 1 | 2 | 1 | 3 | 4  | 0 | 0 |
| 1 | 1 | 1 | 2 | 3  | 0 | 0 |
| 1 | 1 | 1 | 2 | 3  | 0 | 0 |
| 1 | 1 | 1 | 2 | 4  | 0 | 0 |
| 3 | 1 | 1 | 2 | 2  | 0 | 0 |
| 1 | 1 | 1 | 2 | 1  | 0 | 0 |
| 1 | 1 | 1 | 2 | 0  | 0 | 0 |
| 1 | 1 | 1 | 2 | 3  | 0 | 0 |
| 1 | 1 |   |   |    | 1 |   |
| 1 | 1 | 1 | 2 | 3  | 0 | 0 |
| 1 | 1 | 1 | 2 | 2  | 0 | 0 |
| 1 | 1 |   |   |    | 1 |   |
| 1 | 1 | 1 | 2 | 1  | 0 | 0 |
| 3 | 1 | 1 | 1 | 1  | 0 | 0 |
| 1 | 1 | 1 | 2 | 4  | 0 | 0 |
| 1 | 1 | 1 | 2 | 0  | 0 | 0 |
| 1 | 1 | 1 | 1 | 1  | 0 | 0 |
| 1 | 1 | 1 | 1 | 8  | 0 | 1 |
| 1 | 1 | 1 | 2 | 3  | 0 | 0 |
| 1 | 1 | 1 | 2 | 0  | 0 | 0 |
| 1 | 1 | 1 | 1 | 2  | 0 | 0 |
| 1 | 1 | 1 | 2 | 24 | 0 | 1 |
| 1 | 1 | 1 | 2 | 2  | 0 | 0 |
| 3 | 2 | 1 | 3 | 6  | 0 | 0 |
| 1 | 1 | 1 | 2 | 1  | 0 | 0 |
| 1 | 1 | 1 | 2 | 2  | 0 | 0 |
| 1 | 1 | 1 | 2 | 4  | 0 | 0 |
| 1 | 1 | 1 | 2 | 0  | 0 | 0 |
| 1 | 1 | 1 | 2 | 0  | 0 | 0 |
| 1 | 1 | 1 | 2 | 4  | 0 | 0 |
| 1 | 2 | 1 | 3 | 1  | 0 | 0 |
| 1 | 1 | 1 | 2 | 6  | 0 | 0 |
| 1 | 1 | 1 | 1 | 2  | 0 | 0 |
| 1 | 1 | 1 | 2 | 1  | 0 | 0 |
| 1 | 1 | 1 | 2 | 3  | 0 | 0 |
| 1 | 1 | 1 | 2 | 1  | 0 | 0 |
| 1 | 1 | 1 | 2 | 0  | 0 | 0 |
| 3 | 1 | 1 | 2 | 0  | 0 | 0 |
| 1 | 1 | 1 | 2 | 11 | 0 | 1 |
| 1 | 1 | 1 | 2 | 0  | 0 | 0 |
| 1 | 1 | 1 | 2 | 18 | 0 | 1 |
| 1 | 1 | 1 | 2 | 0  | 0 | 0 |
| 1 | 1 | 1 | 2 | 2  | 0 | 0 |
| 1 | 1 | 1 | 1 | 3  | 0 | 0 |
| 1 | 1 | 1 | 1 | 0  | 0 | 0 |
| 1 | 1 | 1 | 2 | 7  | 0 | 0 |
| 3 | 2 | 1 | 3 | 3  | 0 | 0 |
| 1 | 1 | 1 | 1 | 0  | 0 | 0 |
| 1 | 1 | 1 | 2 | 2  | 0 | 0 |
| 1 | 1 | 1 | 1 | 2  | 0 | 0 |
| 3 | 1 | 1 | 2 | 1  | 0 | 0 |

|   |   |   |   |    |   |   |
|---|---|---|---|----|---|---|
| 1 | 1 | 1 | 2 | 2  | 0 | 0 |
| 1 | 1 | 1 | 2 | 3  | 0 | 0 |
| 1 | 1 | 2 | 2 | 4  | 0 | 0 |
| 1 | 1 | 1 | 1 | 2  | 0 | 0 |
| 1 | 1 | 1 | 2 | 3  | 0 | 0 |
| 1 | 1 | 1 | 2 | 1  | 0 | 0 |
| 1 | 1 | 1 | 2 | 0  | 0 | 0 |
| 1 | 1 | 1 | 2 | 3  | 0 | 0 |
| 1 | 1 | 1 | 1 | 0  | 0 | 0 |
| 1 | 1 | 1 | 2 | 3  | 0 | 0 |
| 1 | 1 | 1 | 2 | 2  | 0 | 0 |
| 1 | 1 | 1 | 2 | 0  | 0 | 0 |
| 1 | 1 | 1 | 1 | 31 | 0 | 1 |
| 1 | 1 | 1 | 1 | 0  | 0 | 0 |
| 1 | 1 | 1 | 1 | 3  | 0 | 0 |
| 1 | 1 | 1 | 1 | 3  | 0 | 0 |
| 1 | 1 | 1 | 1 | 0  | 0 | 0 |
| 1 | 1 |   |   |    | 1 |   |
| 1 | 1 | 1 | 1 | 1  | 0 | 0 |
| 1 | 1 | 1 | 2 | 4  | 0 | 0 |
| 1 | 1 | 1 | 2 | 3  | 0 | 0 |
| 3 | 1 | 1 | 1 | 20 | 0 | 1 |
| 1 | 1 | 1 | 2 | 4  | 0 | 0 |
| 1 | 1 | 1 | 1 | 1  | 0 | 0 |
| 1 | 1 | 2 | 1 | 1  | 0 | 0 |
| 1 | 1 | 1 | 2 | 3  | 0 | 0 |
| 2 | 1 | 1 | 2 | 2  | 0 | 0 |
| 1 | 1 | 1 | 1 | 0  | 0 | 0 |
| 1 | 1 | 1 | 1 | 14 | 0 | 1 |
| 2 | 1 | 1 | 2 | 11 | 0 | 1 |
| 1 | 1 | 1 | 2 | 1  | 0 | 0 |
| 1 | 1 | 2 | 2 | 17 | 0 | 1 |
| 1 | 1 | 1 | 2 | 2  | 0 | 0 |
| 1 | 1 | 1 | 2 | 10 | 0 | 1 |
| 2 | 1 | 2 | 2 | 34 | 0 | 1 |
| 3 | 1 | 1 | 2 | 41 | 0 | 1 |
| 2 | 1 | 1 | 2 | 23 | 0 | 1 |
| 1 | 1 | 1 | 1 | 22 | 0 | 1 |
| 1 | 1 | 1 | 2 | 31 | 0 | 1 |
| 1 | 1 | 2 | 2 | 50 | 0 | 1 |
| 1 | 1 | 1 | 1 | 29 | 0 | 1 |
| 2 | 1 | 1 | 2 | 10 | 0 | 1 |
| 1 | 1 | 1 | 1 | 63 | 0 | 1 |
| 3 | 1 | 1 | 2 | 2  | 0 | 0 |
| 3 | 1 | 1 | 1 | 14 | 0 | 1 |
| 1 | 1 | 1 | 2 | 2  | 0 | 0 |
| 1 | 1 | 1 | 2 | 0  | 0 | 0 |
| 1 | 1 | 1 | 2 | 13 | 0 | 1 |
| 2 | 1 | 1 | 2 | 60 | 0 | 1 |
| 2 | 1 | 1 | 2 | 22 | 0 | 1 |
| 2 | 1 | 1 | 2 | 0  | 0 | 0 |
| 1 | 1 | 1 | 2 | 45 | 0 | 1 |
| 1 | 1 | 1 | 2 | 41 | 0 | 1 |
| 1 | 1 | 1 | 2 | 0  | 0 | 0 |

|   |   |   |   |     |   |   |
|---|---|---|---|-----|---|---|
| 1 | 1 | 1 | 2 | 97  | 0 | 1 |
| 1 | 1 | 1 | 2 | 16  | 0 | 1 |
| 1 | 1 | 1 | 2 | 4   | 0 | 0 |
| 2 | 1 | 2 | 1 | 57  | 0 | 1 |
| 2 | 1 | 1 | 2 | 53  | 0 | 1 |
| 1 | 1 | 1 | 1 | 7   | 0 | 0 |
| 2 | 1 | 1 | 2 | 33  | 0 | 1 |
| 2 | 1 | 1 | 1 | 126 | 0 | 1 |
| 2 | 1 | 2 | 2 | 102 | 0 | 1 |
| 2 | 1 | 2 | 1 | 0   | 0 | 0 |
| 2 | 1 | 1 | 2 | 5   | 0 | 0 |
| 2 | 1 | 1 | 2 | 17  | 0 | 1 |
| 1 | 1 | 1 | 2 | 4   | 0 | 0 |
| 1 | 1 | 1 | 1 | 0   | 0 | 0 |
| 1 | 1 | 1 | 2 | 6   | 0 | 0 |
| 1 | 1 | 2 | 1 | 53  | 0 | 1 |
| 2 | 1 | 1 | 2 | 1   | 0 | 0 |
| 1 | 2 | 1 | 3 | 5   | 0 | 0 |
| 2 | 2 | 1 | 3 | 34  | 0 | 1 |
| 2 | 2 | 1 | 3 | 5   | 0 | 0 |
| 3 | 1 | 1 | 2 | 8   | 0 | 1 |
| 1 | 1 | 1 | 1 | 4   | 0 | 0 |
| 1 | 1 | 1 | 2 | 16  | 0 | 1 |
| 2 | 1 | 1 | 2 | 7   | 0 | 0 |
| 1 | 1 | 1 | 2 | 11  | 0 | 1 |
| 2 | 1 | 1 | 1 | 67  | 0 | 1 |
| 2 | 1 | 1 | 2 | 1   | 0 | 0 |
| 2 | 1 | 1 | 2 | 9   | 0 | 1 |
| 2 | 1 | 1 | 1 | 17  | 0 | 1 |
| 1 | 1 | 1 | 2 | 0   | 0 | 0 |
| 1 | 1 | 2 | 1 | 44  | 0 | 1 |
| 1 | 1 | 1 | 2 | 4   | 0 | 0 |
| 1 | 1 | 1 | 1 | 1   | 0 | 0 |
| 1 | 1 | 1 | 2 | 18  | 0 | 1 |
| 1 | 1 | 1 | 2 | 13  | 0 | 1 |
| 1 | 2 | 1 | 3 | 0   | 0 | 0 |
| 3 | 1 | 1 | 2 | 17  | 0 | 1 |
| 1 | 1 | 1 | 2 | 4   | 0 | 0 |
| 2 | 1 | 2 | 2 | 92  | 0 | 1 |
| 2 | 1 | 1 | 2 | 2   | 0 | 0 |
| 2 | 1 | 2 | 1 | 1   | 0 | 0 |
| 1 | 1 | 1 | 2 | 5   | 0 | 0 |
| 2 | 1 | 1 | 2 | 18  | 0 | 1 |
| 1 | 1 | 1 | 2 | 179 | 0 | 1 |
| 1 | 1 | 1 | 2 | 5   | 0 | 0 |
| 1 | 1 | 1 | 1 | 73  | 0 | 1 |
| 1 | 1 | 1 | 1 | 3   | 0 | 0 |
| 1 | 1 | 1 | 2 | 1   | 0 | 0 |
| 1 | 1 | 1 | 2 | 19  | 0 | 1 |
| 1 | 1 | 1 | 2 | 24  | 0 | 1 |
| 2 | 1 | 1 | 2 | 10  | 0 | 1 |
| 3 | 1 | 1 | 2 | 36  | 0 | 1 |
| 2 | 1 | 2 | 2 | 88  | 0 | 1 |
| 1 | 1 | 1 | 2 | 19  | 0 | 1 |

|   |   |   |   |    |   |   |
|---|---|---|---|----|---|---|
| 2 | 1 | 1 | 1 | 16 | 0 | 1 |
| 1 | 1 | 1 | 1 | 2  | 0 | 0 |
| 2 | 1 | 1 | 1 | 38 | 0 | 1 |
| 2 | 1 | 2 | 1 | 61 | 0 | 1 |
| 1 | 1 | 1 | 2 | 1  | 0 | 0 |
| 2 | 1 | 1 | 2 | 54 | 0 | 1 |
| 1 | 1 | 1 | 2 | 0  | 0 | 0 |
| 3 | 1 | 2 | 1 | 0  | 0 | 0 |
| 1 | 1 | 1 | 2 | 48 | 0 | 1 |
| 3 | 1 | 1 | 2 | 36 | 0 | 1 |
| 2 | 1 | 1 | 2 | 30 | 0 | 1 |
| 2 | 1 | 1 | 2 | 33 | 0 | 1 |
| 1 | 1 | 1 | 2 | 2  | 0 | 0 |
| 1 | 1 | 1 | 1 | 68 | 0 | 1 |
| 1 | 1 | 2 | 2 | 5  | 0 | 0 |
| 1 | 1 | 2 | 2 | 17 | 0 | 1 |
| 2 | 1 | 1 | 1 | 14 | 0 | 1 |
| 1 | 1 | 1 | 2 | 0  | 0 | 0 |
| 1 | 1 | 1 | 1 | 7  | 0 | 0 |
| 3 | 1 | 1 | 1 | 35 | 0 | 1 |
| 1 | 1 |   |   |    | 1 |   |
| 1 | 1 | 1 | 2 | 0  | 0 | 0 |
| 1 | 1 | 1 | 2 | 4  | 0 | 0 |
| 1 | 1 | 1 | 1 | 3  | 0 | 0 |
| 1 | 1 | 1 | 2 | 2  | 0 | 0 |
| 1 | 1 | 2 | 2 | 2  | 0 | 0 |
| 3 | 2 | 2 | 3 | 0  | 0 | 0 |
| 1 | 1 | 1 | 2 | 2  | 0 | 0 |
| 1 | 1 | 1 | 2 | 0  | 0 | 0 |
| 3 | 2 | 1 | 3 | 3  | 0 | 0 |
| 1 | 1 | 1 | 2 | 1  | 0 | 0 |
| 1 | 2 | 1 | 3 | 6  | 0 | 0 |
| 1 | 1 | 1 | 1 | 13 | 0 | 1 |
| 1 | 1 | 1 | 2 | 2  | 0 | 0 |
| 1 | 1 | 1 | 2 | 3  | 0 | 0 |
| 3 | 1 | 1 | 2 | 0  | 0 | 0 |
| 1 | 1 | 2 | 2 | 19 | 0 | 1 |
| 1 | 1 | 1 | 2 | 0  | 0 | 0 |
| 1 | 1 | 2 | 2 | 0  | 0 | 0 |
| 1 | 1 | 1 | 2 | 0  | 0 | 0 |
| 1 | 1 | 1 | 2 | 3  | 0 | 0 |
| 1 | 1 | 1 | 2 | 0  | 0 | 0 |
| 1 | 1 | 2 | 1 | 3  | 0 | 0 |
| 1 | 1 | 1 | 2 | 2  | 0 | 0 |
| 1 | 1 | 2 | 2 | 22 | 0 | 1 |
| 1 | 1 | 1 | 2 | 6  | 0 | 0 |
| 1 | 1 | 2 | 1 | 6  | 0 | 0 |
| 1 | 1 | 1 | 1 | 3  | 0 | 0 |
| 1 | 1 | 2 | 2 | 3  | 0 | 0 |
| 1 | 1 | 1 | 2 | 3  | 0 | 0 |
| 1 | 2 | 1 | 3 | 3  | 0 | 0 |
| 1 | 1 | 1 | 2 | 2  | 0 | 0 |
| 1 | 1 | 1 | 2 | 1  | 0 | 0 |
| 3 | 1 | 1 | 2 | 0  | 0 | 0 |





|   |   |   |   |     |   |   |
|---|---|---|---|-----|---|---|
| 1 | 1 | 1 | 1 | 21  | 0 | 1 |
| 1 | 1 | 1 | 1 | 34  | 0 | 1 |
| 1 | 1 | 1 | 2 | 0   | 0 | 0 |
| 1 | 1 | 1 | 1 | 157 | 0 | 1 |
| 1 | 1 | 2 | 2 | 4   | 0 | 0 |
| 1 | 1 | 1 | 2 | 29  | 0 | 1 |
| 1 | 1 | 1 | 2 | 3   | 0 | 0 |
| 1 | 1 | 1 | 2 | 4   | 0 | 0 |
| 1 | 1 | 1 | 2 | 37  | 0 | 1 |
| 1 | 1 | 2 | 1 | 35  | 0 | 1 |
| 1 | 1 | 2 | 2 | 12  | 0 | 1 |
| 1 | 1 | 1 | 2 | 53  | 0 | 1 |
| 1 | 1 | 1 | 1 | 3   | 0 | 0 |
| 1 | 1 | 1 | 2 | 50  | 0 | 1 |
| 1 | 1 | 2 | 2 | 71  | 0 | 1 |
| 1 | 1 | 1 | 2 | 29  | 0 | 1 |
| 1 | 1 | 1 | 2 | 24  | 0 | 1 |
| 1 | 1 | 1 | 2 | 10  | 0 | 1 |
| 1 | 1 | 1 | 2 | 4   | 0 | 0 |
| 1 | 1 | 1 | 2 | 45  | 0 | 1 |
| 1 | 2 | 1 | 3 | 64  | 0 | 1 |
| 1 | 1 | 1 | 2 | 37  | 0 | 1 |
| 1 | 1 | 1 | 2 | 0   | 0 | 0 |
| 1 | 1 | 1 | 2 | 26  | 0 | 1 |
| 1 | 1 | 1 | 2 | 75  | 0 | 1 |
| 1 | 1 | 1 | 1 | 39  | 0 | 1 |
| 1 | 1 | 1 | 2 | 18  | 0 | 1 |
| 1 | 1 | 1 | 1 | 17  | 0 | 1 |
| 1 | 2 | 1 | 3 | 18  | 0 | 1 |
| 1 | 1 | 1 | 1 | 6   | 0 | 0 |
| 1 | 1 | 2 | 1 | 16  | 0 | 1 |
| 1 | 1 | 1 | 2 | 9   | 0 | 1 |
| 1 | 1 | 1 | 2 | 254 | 1 |   |
| 1 | 1 | 1 | 2 | 24  | 0 | 1 |
| 1 | 2 | 1 | 3 | 8   | 0 | 1 |
| 1 | 1 | 2 | 2 | 8   | 0 | 1 |
| 1 | 1 | 1 | 2 | 33  | 0 | 1 |
| 1 | 1 | 1 | 2 | 22  | 0 | 1 |
| 1 | 1 | 1 | 2 | 20  | 0 | 1 |
| 1 | 1 | 1 | 2 | 24  | 0 | 1 |
| 1 | 1 | 1 | 2 | 23  | 0 | 1 |
| 1 | 1 | 1 | 2 | 228 | 1 |   |
| 1 | 1 | 1 | 1 | 21  | 0 | 1 |
| 1 | 1 | 1 | 2 | 1   | 0 | 0 |
| 1 | 1 | 2 | 2 | 2   | 0 | 0 |
| 1 | 1 | 1 | 2 | 39  | 0 | 1 |
| 1 | 1 | 1 | 2 | 18  | 0 | 1 |
| 1 | 1 | 2 | 2 | 3   | 0 | 0 |
| 1 | 1 | 1 | 2 | 3   | 0 | 0 |
| 1 | 1 | 1 | 2 | 2   | 0 | 0 |
| 1 | 1 | 1 | 2 | 2   | 0 | 0 |
| 1 | 1 | 2 | 1 | 1   | 0 | 0 |
| 1 | 1 | 1 | 2 | 65  | 0 | 1 |
| 1 | 1 | 1 | 2 | 13  | 0 | 1 |

|   |   |   |   |     |   |   |
|---|---|---|---|-----|---|---|
| 1 | 1 | 1 | 2 | 37  | 0 | 1 |
| 1 | 1 | 1 | 2 | 10  | 0 | 1 |
| 1 | 1 | 1 | 2 | 3   | 0 | 0 |
| 1 | 1 | 2 | 2 | 13  | 0 | 1 |
| 1 | 1 | 2 | 2 | 35  | 0 | 1 |
| 1 | 1 | 1 | 2 | 10  | 0 | 1 |
| 1 | 1 | 1 | 2 | 20  | 0 | 1 |
| 1 | 1 | 1 | 2 | 34  | 0 | 1 |
| 1 | 1 | 2 | 2 | 15  | 0 | 1 |
| 1 | 1 | 1 | 2 | 183 | 1 |   |
| 1 | 1 | 1 | 2 | 30  | 0 | 1 |
| 1 | 1 | 2 | 1 | 39  | 0 | 1 |
| 1 | 1 | 1 | 2 | 67  | 0 | 1 |
| 1 | 1 | 1 | 2 | 3   | 0 | 0 |
| 1 | 1 | 1 | 2 | 0   | 0 | 0 |
| 1 | 1 | 2 | 2 | 35  | 0 | 1 |
| 1 | 1 | 2 | 2 | 16  | 0 | 1 |
| 1 | 1 | 1 | 2 | 12  | 0 | 1 |
| 1 | 1 | 2 | 2 | 28  | 0 | 1 |
| 1 | 1 | 1 | 1 | 30  | 0 | 1 |
| 1 | 1 | 1 | 2 | 20  | 0 | 1 |
| 1 | 1 | 1 | 2 | 9   | 0 | 1 |
| 1 | 1 | 2 | 1 | 40  | 0 | 1 |
| 1 | 1 | 1 | 2 | 62  | 0 | 1 |
| 1 | 1 | 1 | 2 | 15  | 0 | 1 |
| 1 | 1 | 1 | 2 | 7   | 0 | 0 |
| 1 | 1 | 1 | 2 | 3   | 0 | 0 |
| 1 | 1 | 1 | 2 | 14  | 0 | 1 |
| 1 | 1 | 1 | 2 | 11  | 0 | 1 |
| 1 | 1 | 1 | 2 | 2   | 0 | 0 |
| 1 | 1 | 1 | 1 | 22  | 0 | 1 |
| 1 | 1 | 1 | 2 | 1   | 0 | 0 |
| 1 | 1 | 1 | 2 | 37  | 0 | 1 |
| 1 | 1 | 1 | 2 | 44  | 0 | 1 |
| 1 | 1 | 1 | 2 | 0   | 0 | 0 |
| 1 | 1 | 1 | 1 | 21  | 0 | 1 |
| 1 | 1 | 1 | 2 | 34  | 0 | 1 |
| 1 | 1 | 1 | 1 | 6   | 0 | 0 |
| 1 | 1 | 2 | 2 | 66  | 0 | 1 |
| 1 | 1 | 2 | 1 | 6   | 0 | 0 |
| 1 | 1 | 1 | 2 | 32  | 0 | 1 |
| 1 | 1 | 1 | 2 | 22  | 0 | 1 |
| 1 | 1 | 1 | 2 | 75  | 0 | 1 |
| 1 | 1 | 1 | 2 | 12  | 0 | 1 |
| 1 | 1 | 1 | 2 | 30  | 0 | 1 |
| 1 | 1 | 1 | 2 | 23  | 0 | 1 |
| 1 | 1 | 1 | 2 | 10  | 0 | 1 |
| 1 | 1 | 1 | 2 | 18  | 0 | 1 |
| 1 | 1 | 1 | 2 | 20  | 0 | 1 |
| 1 | 1 | 1 | 2 | 27  | 0 | 1 |
| 1 | 1 | 1 | 1 | 33  | 0 | 1 |
| 1 | 1 | 1 | 2 | 18  | 0 | 1 |
| 1 | 1 | 1 | 2 | 7   | 0 | 0 |
| 1 | 1 | 2 | 2 | 1   | 0 | 0 |

|   |   |   |   |     |   |   |
|---|---|---|---|-----|---|---|
| 1 | 1 | 1 | 1 | 4   | 0 | 0 |
| 1 | 1 | 1 | 2 | 37  | 0 | 1 |
| 1 | 1 | 1 | 2 | 3   | 0 | 0 |
| 1 | 1 | 1 | 2 | 6   | 0 | 0 |
| 1 | 1 | 2 | 2 | 17  | 0 | 1 |
| 1 | 1 | 1 | 2 | 2   | 0 | 0 |
| 1 | 1 | 1 | 2 | 34  | 0 | 1 |
| 1 | 1 | 1 | 2 | 5   | 0 | 0 |
| 1 | 1 | 1 | 2 | 154 | 0 | 1 |
| 1 | 1 | 1 | 1 | 14  | 0 | 1 |
| 1 | 1 | 1 | 2 | 15  | 0 | 1 |
| 1 | 1 | 1 | 2 | 12  | 0 | 1 |
| 1 | 1 | 1 | 2 | 17  | 0 | 1 |
| 1 | 1 | 1 | 1 | 7   | 0 | 0 |
| 1 | 1 | 1 | 2 | 8   | 0 | 1 |
| 1 | 1 | 1 | 2 | 4   | 0 | 0 |
| 1 | 1 | 1 | 2 | 6   | 0 | 0 |
| 1 | 1 | 1 | 1 | 0   | 0 | 0 |
| 1 | 1 | 1 | 2 | 185 | 1 |   |
| 1 | 1 | 1 | 2 | 8   | 0 | 1 |
| 1 | 1 | 1 | 1 | 38  | 0 | 1 |
| 1 | 1 | 1 | 2 | 11  | 0 | 1 |
| 1 | 1 | 2 | 2 | 125 | 0 | 1 |
| 1 | 1 | 1 | 2 | 5   | 0 | 0 |
| 1 | 1 | 1 | 2 | 32  | 0 | 1 |
| 1 | 1 | 1 | 2 | 64  | 0 | 1 |
| 1 | 1 | 2 | 2 | 94  | 0 | 1 |
| 1 | 1 | 1 | 2 | 48  | 0 | 1 |
| 1 | 1 | 1 | 2 | 101 | 0 | 1 |
| 1 | 1 | 1 | 2 | 1   | 0 | 0 |
| 1 | 1 | 1 | 2 | 55  | 0 | 1 |
| 1 | 1 | 1 | 2 | 61  | 0 | 1 |
| 1 | 1 | 2 | 1 | 4   | 0 | 0 |
| 1 | 1 | 1 | 2 | 0   | 0 | 0 |
| 1 | 1 | 1 | 1 | 98  | 0 | 1 |
| 1 | 1 | 1 | 2 | 34  | 0 | 1 |
| 1 | 1 | 1 | 2 | 6   | 0 | 0 |
| 1 | 1 | 2 | 2 | 18  | 0 | 1 |
| 1 | 1 | 1 | 2 | 60  | 0 | 1 |
| 1 | 1 | 1 | 2 | 10  | 0 | 1 |
| 1 | 1 | 1 | 2 | 12  | 0 | 1 |
| 1 | 1 | 1 | 2 | 12  | 0 | 1 |
| 1 | 1 | 1 | 2 | 3   | 0 | 0 |
| 1 | 1 | 2 | 1 | 10  | 0 | 1 |
| 1 | 1 | 1 | 2 | 41  | 0 | 1 |
| 1 | 1 | 1 | 2 | 34  | 0 | 1 |
| 1 | 2 | 1 | 3 | 33  | 0 | 1 |
| 1 | 1 | 1 | 1 | 3   | 0 | 0 |
| 1 | 1 | 1 | 2 | 46  | 0 | 1 |
| 1 | 1 | 1 | 2 | 23  | 0 | 1 |
| 1 | 1 | 1 | 2 | 1   | 0 | 0 |
| 1 | 1 | 1 | 2 | 20  | 0 | 1 |
| 1 | 1 | 1 | 1 | 10  | 0 | 1 |
| 1 | 1 | 1 | 2 | 64  | 0 | 1 |

|   |   |   |   |     |   |   |
|---|---|---|---|-----|---|---|
| 1 | 1 | 1 | 2 | 73  | 0 | 1 |
| 1 | 2 | 1 | 3 | 2   | 0 | 0 |
| 1 | 1 | 1 | 2 | 2   | 0 | 0 |
| 1 | 1 | 1 | 1 | 44  | 0 | 1 |
| 1 | 1 | 1 | 2 | 30  | 0 | 1 |
| 1 | 1 | 2 | 2 | 3   | 0 | 0 |
| 1 | 1 | 1 | 2 | 19  | 0 | 1 |
| 1 | 1 | 1 | 2 | 164 | 0 | 1 |
| 1 | 1 | 1 | 2 | 13  | 0 | 1 |
| 1 | 1 | 1 | 2 | 72  | 0 | 1 |
| 1 | 1 | 1 | 2 | 167 | 0 | 1 |
| 1 | 1 | 1 | 2 | 5   | 0 | 0 |
| 1 | 1 | 1 | 2 | 36  | 0 | 1 |
| 1 | 1 | 1 | 2 | 17  | 0 | 1 |
| 1 | 1 | 1 | 2 | 24  | 0 | 1 |
| 1 | 1 | 1 | 2 | 18  | 0 | 1 |
| 1 | 1 | 1 | 2 | 0   | 0 | 0 |
| 1 | 1 | 1 | 2 | 34  | 0 | 1 |
| 1 | 1 | 1 | 2 | 34  | 0 | 1 |
| 1 | 1 | 1 | 2 | 22  | 0 | 1 |
| 1 | 1 | 1 | 1 | 2   | 0 | 0 |
| 1 | 1 | 1 | 2 | 1   | 0 | 0 |
| 1 | 1 | 1 | 2 | 0   | 0 | 0 |
| 1 | 1 | 1 | 2 | 15  | 0 | 1 |
| 1 | 1 | 1 | 2 | 64  | 0 | 1 |
| 1 | 1 | 1 | 1 | 13  | 0 | 1 |
| 1 | 1 | 1 | 2 | 1   | 0 | 0 |
| 1 | 1 | 1 | 2 | 12  | 0 | 1 |
| 1 | 1 | 2 | 2 | 12  | 0 | 1 |
| 1 | 1 | 1 | 1 | 34  | 0 | 1 |
| 1 | 1 | 1 | 1 | 28  | 0 | 1 |
| 1 | 1 | 1 | 2 | 20  | 0 | 1 |
| 1 | 1 | 1 | 2 | 44  | 0 | 1 |
| 1 | 1 | 1 | 2 | 8   | 0 | 1 |
| 1 | 1 | 1 | 2 | 0   | 0 | 0 |
| 1 | 1 | 1 | 1 | 126 | 0 | 1 |
| 1 | 1 | 1 | 2 | 19  | 0 | 1 |
| 1 | 1 | 1 | 2 | 16  | 0 | 1 |
| 1 | 1 | 1 | 2 | 32  | 0 | 1 |
| 1 | 1 | 1 | 2 | 35  | 0 | 1 |
| 1 | 1 | 1 | 2 | 24  | 0 | 1 |
| 1 | 1 | 1 | 2 | 31  | 0 | 1 |
| 1 | 1 | 1 | 2 | 2   | 0 | 0 |
| 1 | 1 | 1 | 1 | 17  | 0 | 1 |
| 1 | 1 | 1 | 2 | 69  | 0 | 1 |
| 1 | 1 | 1 | 1 | 1   | 0 | 0 |
| 1 | 1 | 1 | 1 | 13  | 0 | 1 |
| 1 | 1 | 1 | 1 | 14  | 0 | 1 |
| 1 | 1 | 2 | 1 | 14  | 0 | 1 |
| 1 | 1 | 1 | 2 | 9   | 0 | 1 |
| 1 | 1 | 2 | 2 | 16  | 0 | 1 |
| 1 | 1 | 1 | 2 | 32  | 0 | 1 |
| 1 | 1 | 1 | 2 | 3   | 0 | 0 |
| 1 | 1 | 1 | 1 | 16  | 0 | 1 |

|   |   |   |   |    |   |   |
|---|---|---|---|----|---|---|
| 1 | 1 | 2 | 2 | 36 | 0 | 1 |
| 1 | 1 | 1 | 2 | 5  | 0 | 0 |
| 1 | 1 | 1 | 2 | 6  | 0 | 0 |
| 1 | 1 | 1 | 2 | 10 | 0 | 1 |
| 1 | 1 | 1 | 2 | 8  | 0 | 1 |
| 1 | 1 | 1 | 2 | 33 | 0 | 1 |
| 1 | 1 | 1 | 2 | 4  | 0 | 0 |
| 1 | 1 | 1 | 2 | 78 | 0 | 1 |
| 1 | 1 | 1 | 2 | 32 | 0 | 1 |
| 1 | 1 | 1 | 1 | 22 | 0 | 1 |
| 1 | 1 | 1 | 2 | 1  | 0 | 0 |
| 1 | 1 | 1 | 2 | 33 | 0 | 1 |
| 1 | 1 | 1 | 2 | 3  | 0 | 0 |
| 1 | 1 | 1 | 1 | 14 | 0 | 1 |
| 1 | 1 | 1 | 2 | 7  | 0 | 0 |
| 1 | 1 | 1 | 2 | 4  | 0 | 0 |
| 1 | 1 | 2 | 2 | 11 | 0 | 1 |
| 1 | 1 | 1 | 2 | 31 | 0 | 1 |
| 1 | 1 | 1 | 2 | 18 | 0 | 1 |
| 1 | 1 | 1 | 1 | 13 | 0 | 1 |
| 1 | 1 | 1 | 2 | 24 | 0 | 1 |
| 1 | 1 | 1 | 2 | 43 | 0 | 1 |
| 1 | 1 | 1 | 1 | 21 | 0 | 1 |
| 1 | 2 | 1 | 3 | 22 | 0 | 1 |
| 1 | 1 | 1 | 2 | 50 | 0 | 1 |
| 1 | 1 | 1 | 2 | 21 | 0 | 1 |
| 1 | 1 | 1 | 2 | 10 | 0 | 1 |
| 1 | 1 | 1 | 2 | 3  | 0 | 0 |
| 1 | 1 | 1 | 1 | 63 | 0 | 1 |
| 1 | 1 | 2 | 2 | 93 | 0 | 1 |
| 1 | 1 | 1 | 2 | 67 | 0 | 1 |
| 1 | 1 | 1 | 2 | 39 | 0 | 1 |
| 1 | 1 | 1 | 2 | 36 | 0 | 1 |
| 1 | 1 | 2 | 1 | 19 | 0 | 1 |
| 1 | 1 | 1 | 2 | 61 | 0 | 1 |
| 1 | 1 | 1 | 2 | 33 | 0 | 1 |
| 1 | 1 | 1 | 2 | 9  | 0 | 1 |
| 1 | 1 | 1 | 2 | 57 | 0 | 1 |
| 1 | 1 | 1 | 1 | 0  | 0 | 0 |
| 1 | 1 | 1 | 1 | 0  | 0 | 0 |
| 1 | 1 | 2 | 2 | 19 | 0 | 1 |
| 1 | 1 | 1 | 2 | 34 | 0 | 1 |
| 1 | 1 | 1 | 2 | 0  | 0 | 0 |
| 1 | 1 | 1 | 2 | 12 | 0 | 1 |
| 1 | 1 | 1 | 2 | 3  | 0 | 0 |
| 1 | 1 | 1 | 2 | 21 | 0 | 1 |
| 1 | 1 | 2 | 1 | 7  | 0 | 0 |
| 1 | 1 | 2 | 1 | 0  | 0 | 0 |
| 1 | 1 | 1 | 2 | 24 | 0 | 1 |
| 1 | 1 | 1 | 2 | 2  | 0 | 0 |
| 1 | 1 | 2 | 2 | 4  | 0 | 0 |
| 1 | 1 | 1 | 2 | 35 | 0 | 1 |
| 1 | 2 | 1 | 3 | 18 | 0 | 1 |
| 1 | 1 | 1 | 2 | 4  | 0 | 0 |

|   |   |   |   |    |   |   |
|---|---|---|---|----|---|---|
| 1 | 1 | 1 | 1 | 31 | 0 | 1 |
| 1 | 2 | 1 | 3 | 60 | 0 | 1 |
| 1 | 1 | 1 | 2 | 0  | 0 | 0 |
| 1 | 1 | 1 | 2 | 37 | 0 | 1 |
| 1 | 1 | 2 | 2 | 16 | 0 | 1 |
| 1 | 1 | 1 | 1 | 59 | 0 | 1 |
| 1 | 1 | 2 | 2 | 23 | 0 | 1 |
| 1 | 1 | 2 | 2 | 49 | 0 | 1 |
| 1 | 1 | 1 | 2 | 41 | 0 | 1 |
| 1 | 1 | 1 | 2 | 3  | 0 | 0 |
| 1 | 1 | 1 | 1 | 20 | 0 | 1 |
| 1 | 1 | 1 | 2 | 38 | 0 | 1 |
| 1 | 1 | 1 | 2 | 3  | 0 | 0 |
| 1 | 1 | 1 | 2 | 17 | 0 | 1 |
| 1 | 1 | 1 | 2 | 0  | 0 | 0 |
| 1 | 1 | 1 | 1 | 14 | 0 | 1 |
| 1 | 1 | 1 | 2 | 0  | 0 | 0 |
| 1 | 1 | 1 | 2 | 53 | 0 | 1 |
| 1 | 1 | 1 | 1 | 0  | 0 | 0 |
| 1 | 1 | 1 | 2 | 13 | 0 | 1 |
| 1 | 1 | 1 | 2 | 62 | 0 | 1 |
| 1 | 1 | 1 | 1 | 30 | 0 | 1 |
| 1 | 1 | 1 | 2 | 61 | 0 | 1 |
| 1 | 1 | 2 | 1 | 30 | 0 | 1 |
| 1 | 1 | 1 | 1 | 56 | 0 | 1 |
| 1 | 1 | 2 | 1 | 5  | 0 | 0 |
| 1 | 1 | 1 | 2 | 4  | 0 | 0 |
| 1 | 1 | 1 | 2 | 6  | 0 | 0 |
| 1 | 1 | 1 | 2 | 0  | 0 | 0 |
| 1 | 1 | 1 | 2 | 23 | 0 | 1 |
| 1 | 1 | 1 | 1 | 7  | 0 | 0 |
| 1 | 1 | 2 | 1 | 56 | 0 | 1 |
| 1 | 1 | 1 | 2 | 31 | 0 | 1 |
| 1 | 1 | 1 | 2 | 3  | 0 | 0 |
| 1 | 1 | 2 | 2 | 37 | 0 | 1 |
| 1 | 1 | 1 | 1 | 10 | 0 | 1 |
| 1 | 1 | 1 | 2 | 36 | 0 | 1 |
| 1 | 1 | 1 | 1 | 36 | 0 | 1 |
| 1 | 1 | 1 | 1 | 23 | 0 | 1 |
| 1 | 1 | 1 | 2 | 0  | 0 | 0 |
| 1 | 1 | 1 | 2 | 45 | 0 | 1 |
| 1 | 1 | 1 | 2 | 0  | 0 | 0 |
| 1 | 1 | 1 | 1 | 1  | 0 | 0 |
| 1 | 1 | 1 | 2 | 6  | 0 | 0 |
| 1 | 1 | 1 | 2 | 39 | 0 | 1 |
| 1 | 1 | 1 | 2 | 5  | 0 | 0 |
| 1 | 1 | 1 | 2 | 1  | 0 | 0 |
| 1 | 1 | 1 | 2 | 34 | 0 | 1 |
| 1 | 1 | 1 | 2 | 42 | 0 | 1 |
| 1 | 1 | 1 | 1 | 17 | 0 | 1 |
| 1 | 1 | 1 | 2 | 5  | 0 | 0 |
| 1 | 1 | 2 | 2 | 16 | 0 | 1 |
| 1 | 1 | 1 | 2 | 2  | 0 | 0 |
| 1 | 1 | 2 | 2 | 19 | 0 | 1 |

|   |   |   |   |     |   |   |
|---|---|---|---|-----|---|---|
| 1 | 1 | 1 | 1 | 31  | 0 | 1 |
| 1 | 1 | 2 | 2 | 3   | 0 | 0 |
| 1 | 1 | 1 | 2 | 25  | 0 | 1 |
| 1 | 1 | 1 | 2 | 1   | 0 | 0 |
| 1 | 1 | 1 | 2 | 0   | 0 | 0 |
| 1 | 1 | 2 | 1 | 8   | 0 | 1 |
| 1 | 1 | 2 | 2 | 12  | 0 | 1 |
| 1 | 1 | 1 | 2 | 1   | 0 | 0 |
| 1 | 1 | 2 | 2 | 20  | 0 | 1 |
| 1 | 1 | 1 | 1 | 3   | 0 | 0 |
| 1 | 1 | 1 | 2 | 5   | 0 | 0 |
| 1 | 1 | 2 | 2 | 8   | 0 | 1 |
| 1 | 1 | 1 | 2 | 7   | 0 | 0 |
| 1 | 1 | 1 | 2 | 8   | 0 | 1 |
| 1 | 1 | 2 | 2 | 10  | 0 | 1 |
| 1 | 1 | 1 | 1 | 10  | 0 | 1 |
| 1 | 1 | 1 | 2 | 10  | 0 | 1 |
| 1 | 1 | 1 | 2 | 12  | 0 | 1 |
| 1 | 1 | 2 | 1 | 12  | 0 | 1 |
| 1 | 1 | 2 | 2 | 7   | 0 | 0 |
| 1 | 1 | 1 | 1 | 1   | 0 | 0 |
| 2 | 1 | 1 | 2 | 113 | 0 | 1 |
| 2 | 1 | 1 | 3 | 191 | 1 |   |
| 1 | 1 | 1 | 2 | 3   | 0 | 0 |
| 3 | 1 | 1 | 3 | 44  | 0 | 1 |
| 2 | 1 |   |   |     | 1 |   |
| 1 | 1 | 1 | 1 | 0   | 0 | 0 |
| 2 | 1 | 1 | 2 | 0   | 0 | 0 |
| 2 | 1 |   |   |     | 1 |   |
| 1 | 1 | 1 | 2 | 2   | 0 | 0 |
| 2 | 1 |   |   |     | 1 |   |
| 2 | 1 | 1 | 2 | 0   | 0 | 0 |
| 1 | 1 | 1 | 2 | 0   | 0 | 0 |
| 2 | 1 |   |   |     | 1 |   |
| 2 | 1 |   |   |     | 1 |   |
| 2 | 1 |   |   |     | 1 |   |
| 2 | 1 | 1 | 2 | 0   | 0 | 0 |
| 2 | 1 |   |   |     | 1 |   |
| 2 | 1 | 1 | 2 | 0   | 0 | 0 |
| 1 | 1 | 1 | 1 | 0   | 0 | 0 |
| 3 | 1 | 1 | 2 | 0   | 0 | 0 |
| 3 | 1 | 1 | 2 | 0   | 0 | 0 |
| 2 | 1 |   |   |     | 1 |   |
| 2 | 1 |   |   |     | 1 |   |
| 3 | 1 | 1 | 1 | 2   | 0 | 0 |
| 2 | 1 |   |   |     | 1 |   |
| 2 | 1 |   |   |     | 1 |   |
| 2 | 1 |   |   |     | 1 |   |
| 2 | 1 | 1 | 2 | 1   | 0 | 0 |
| 2 | 1 |   |   |     | 1 |   |
| 2 | 1 | 1 | 2 | 0   | 0 | 0 |
| 1 | 1 | 1 | 2 | 0   | 0 | 0 |
| 2 | 1 |   |   |     | 1 |   |

|   |   |   |   |    |   |   |
|---|---|---|---|----|---|---|
| 2 | 1 |   |   |    | 1 |   |
| 2 | 1 | 1 | 2 | 0  | 0 | 0 |
| 2 | 1 |   |   |    | 1 |   |
| 3 | 1 | 1 | 2 | 0  | 0 | 0 |
| 1 | 1 | 1 | 2 | 7  | 0 | 0 |
| 2 | 1 | 1 | 2 | 1  | 0 | 0 |
| 3 | 1 | 1 | 2 | 1  | 0 | 0 |
| 2 | 1 | 1 | 2 | 0  | 0 | 0 |
| 2 | 1 | 1 | 2 | 0  | 0 | 0 |
| 3 | 1 | 1 | 2 | 8  | 0 | 1 |
| 2 | 1 |   |   |    | 1 |   |
| 2 | 1 | 1 | 2 | 0  | 0 | 0 |
| 2 | 1 |   |   |    | 1 |   |
| 2 | 1 |   |   |    | 1 |   |
| 1 | 1 | 1 | 1 | 1  | 0 | 0 |
| 2 | 1 |   |   |    | 1 |   |
| 2 | 1 |   |   |    | 1 |   |
| 2 | 1 |   |   |    | 1 |   |
| 2 | 1 |   |   |    | 1 |   |
| 1 | 1 | 1 | 2 | 1  | 0 | 0 |
| 2 | 1 |   |   |    | 1 |   |
| 2 | 1 |   |   |    | 1 |   |
| 1 | 1 |   |   |    | 1 |   |
| 1 | 1 | 1 | 1 | 0  | 0 | 0 |
| 1 | 1 | 1 | 2 | 1  | 0 | 0 |
| 3 | 1 | 1 | 2 | 4  | 0 | 0 |
| 2 | 1 |   |   |    | 1 |   |
| 2 | 1 | 1 | 1 | 0  | 0 | 0 |
| 2 | 1 | 1 | 1 | 1  | 0 | 0 |
| 2 | 1 |   |   |    | 1 |   |
| 3 | 1 | 1 | 2 | 1  | 0 | 0 |
| 1 | 1 |   |   |    | 1 |   |
| 2 | 1 |   |   |    | 1 |   |
| 1 | 1 | 1 | 2 | 3  | 0 | 0 |
| 1 | 1 | 1 | 2 | 2  | 0 | 0 |
| 2 | 1 | 1 | 2 | 0  | 0 | 0 |
| 2 | 1 |   |   |    | 1 |   |
| 2 | 1 |   |   |    | 1 |   |
| 2 | 1 | 1 | 2 | 0  | 0 | 0 |
| 1 | 1 | 1 | 2 | 2  | 0 | 0 |
| 2 | 1 |   |   |    | 1 |   |
| 2 | 1 |   |   |    | 1 |   |
| 2 | 1 | 1 | 2 | 0  | 0 | 0 |
| 2 | 1 | 1 | 2 | 0  | 0 | 0 |
| 2 | 1 |   |   |    | 1 |   |
| 1 | 1 |   |   |    | 1 |   |
| 3 | 1 | 1 | 2 | 0  | 0 | 0 |
| 2 | 1 | 1 | 2 | 0  | 0 | 0 |
| 2 | 1 |   |   |    | 1 |   |
| 2 | 1 | 1 | 2 | 0  | 0 | 0 |
| 2 | 1 | 1 | 2 | 0  | 0 | 0 |
| 3 | 1 | 1 | 2 | 0  | 0 | 0 |
| 2 | 1 |   |   |    | 1 |   |
| 1 | 1 | 1 | 2 | 12 | 0 | 1 |



|   |   |   |   |     |   |   |
|---|---|---|---|-----|---|---|
| 1 | 1 |   |   |     | 1 |   |
| 1 | 1 | 1 | 1 | 0   | 0 | 0 |
| 2 | 1 |   |   |     | 1 |   |
| 2 | 1 |   |   |     | 1 |   |
| 2 | 1 | 1 | 2 | 0   | 0 | 0 |
| 1 | 1 |   |   |     | 1 |   |
| 1 | 1 | 1 | 2 | 4   | 0 | 0 |
| 2 | 1 |   |   |     | 1 |   |
| 2 | 1 | 1 | 2 | 0   | 0 | 0 |
| 2 | 1 |   |   |     | 1 |   |
| 2 | 1 |   |   |     | 1 |   |
| 1 | 1 | 1 | 1 | 1   | 0 | 0 |
| 2 | 1 |   |   |     | 1 |   |
| 2 | 1 |   |   |     | 1 |   |
| 2 | 1 |   |   |     | 1 |   |
| 2 | 1 | 1 | 2 | 0   | 0 | 0 |
| 3 | 1 | 1 | 2 | 25  | 0 | 1 |
| 1 | 1 | 1 | 2 | 0   | 0 | 0 |
| 2 | 1 |   |   |     | 1 |   |
| 1 | 1 |   |   |     | 1 |   |
| 2 | 1 |   |   |     | 1 |   |
| 1 | 1 | 1 | 2 | 157 | 0 | 1 |
| 2 | 1 |   |   |     | 1 |   |
| 2 | 1 |   |   |     | 1 |   |
| 1 | 1 | 1 | 1 | 1   | 0 | 0 |
| 2 | 1 | 1 | 2 | 23  | 0 | 1 |
| 2 | 1 |   |   |     | 1 |   |
| 2 | 1 |   |   |     | 1 |   |
| 2 | 1 |   |   |     | 1 |   |
| 1 | 1 |   |   |     | 1 |   |
| 2 | 1 | 1 | 2 | 0   | 0 | 0 |
| 2 | 1 |   |   |     | 1 |   |
| 3 | 1 | 1 | 2 | 5   | 0 | 0 |
| 2 | 1 | 1 | 1 | 60  | 0 | 1 |
| 2 | 1 | 1 | 2 | 0   | 0 | 0 |
| 1 | 1 | 1 | 2 | 2   | 0 | 0 |
| 3 | 1 | 1 | 2 | 17  | 0 | 1 |
| 2 | 1 |   |   |     | 1 |   |
| 1 | 1 | 1 | 2 | 1   | 0 | 0 |
| 2 | 1 |   |   |     | 1 |   |
| 2 | 1 |   |   |     | 1 |   |
| 2 | 1 |   |   |     | 1 |   |
| 2 | 1 | 1 | 2 | 1   | 0 | 0 |
| 2 | 1 |   |   |     | 1 |   |
| 2 | 1 |   |   |     | 1 |   |
| 2 | 1 | 1 | 2 | 0   | 0 | 0 |
| 2 | 1 |   |   |     | 1 |   |
| 2 | 1 | 1 | 1 | 0   | 0 | 0 |
| 2 | 1 |   |   |     | 1 |   |
| 2 | 1 |   |   |     | 1 |   |
| 2 | 1 | 1 | 2 | 0   | 0 | 0 |
| 2 | 1 |   |   |     | 1 |   |
| 3 | 1 | 1 | 2 | 0   | 0 | 0 |

|   |   |   |   |   |   |   |
|---|---|---|---|---|---|---|
| 1 | 1 | 1 | 2 | 1 | 0 | 0 |
| 3 | 1 | 1 | 1 | 3 | 0 | 0 |
| 2 | 1 |   |   |   | 1 |   |
| 2 | 1 | 1 | 2 | 0 | 0 | 0 |
| 2 | 1 | 1 | 2 | 0 | 0 | 0 |
| 2 | 1 |   |   |   | 1 |   |
| 2 | 1 |   |   |   | 1 |   |
| 3 | 1 | 1 | 2 | 6 | 0 | 0 |
| 1 | 1 | 1 | 2 | 0 | 0 | 0 |
| 2 | 1 |   |   |   | 1 |   |
| 1 | 1 | 1 | 2 | 1 | 0 | 0 |
| 2 | 1 |   |   |   | 1 |   |
| 3 | 1 | 1 | 2 | 1 | 0 | 0 |
| 1 | 1 |   |   |   | 1 |   |
| 2 | 1 | 1 | 2 | 0 | 0 | 0 |
| 2 | 1 | 1 | 2 | 0 | 0 | 0 |
| 2 | 1 | 1 | 2 | 0 | 0 | 0 |
| 1 | 1 | 1 | 2 | 1 | 0 | 0 |
| 2 | 1 |   |   |   | 1 |   |
| 2 | 1 | 1 | 2 | 0 | 0 | 0 |
| 2 | 1 |   |   |   | 1 |   |
| 2 | 1 |   |   |   | 1 |   |
| 2 | 1 |   |   |   | 1 |   |
| 2 | 1 | 1 | 2 | 0 | 0 | 0 |
| 1 | 1 |   |   |   | 1 |   |
| 2 | 1 | 1 | 2 | 1 | 0 | 0 |
| 2 | 1 |   |   |   | 1 |   |
| 2 | 1 | 1 | 2 | 0 | 0 | 0 |
| 2 | 1 | 1 | 2 | 0 | 0 | 0 |
| 1 | 1 |   |   |   | 1 |   |
| 2 | 1 |   |   |   | 1 |   |
| 2 | 1 |   |   |   | 1 |   |
| 3 | 1 | 1 | 2 | 3 | 0 | 0 |
| 3 | 1 | 1 | 2 | 0 | 0 | 0 |
| 2 | 1 |   |   |   | 1 |   |
| 3 | 1 | 1 | 2 | 0 | 0 | 0 |
| 1 | 1 | 1 | 2 | 0 | 0 | 0 |
| 1 | 1 | 1 | 2 | 7 | 0 | 0 |
| 3 | 1 | 1 | 1 | 0 | 0 | 0 |
| 2 | 1 |   |   |   | 1 |   |
| 2 | 1 |   |   |   | 1 |   |
| 2 | 1 | 1 | 2 | 0 | 0 | 0 |
| 2 | 1 |   |   |   | 1 |   |
| 2 | 1 |   |   |   | 1 |   |
| 2 | 1 | 1 | 2 | 0 | 0 | 0 |
| 2 | 1 | 1 | 2 | 0 | 0 | 0 |
| 2 | 1 | 1 | 2 | 0 | 0 | 0 |
| 2 | 1 | 1 | 2 | 0 | 0 | 0 |
| 2 | 1 | 1 | 2 | 0 | 0 | 0 |
| 1 | 1 |   |   |   | 1 |   |

|   |   |   |   |    |   |   |
|---|---|---|---|----|---|---|
| 3 | 1 | 1 | 2 | 0  | 0 | 0 |
| 1 | 1 | 1 | 2 | 2  | 0 | 0 |
| 1 | 1 | 1 | 1 | 20 | 0 | 1 |
| 1 | 1 |   |   |    | 1 |   |
| 2 | 1 | 1 | 2 | 0  | 0 | 0 |
| 1 | 1 |   |   |    | 1 |   |
| 2 | 1 |   |   |    | 1 |   |
| 1 | 1 | 1 | 2 | 0  | 0 | 0 |
| 2 | 1 |   |   |    | 1 |   |
| 1 | 1 | 1 | 2 | 0  | 0 | 0 |
| 1 | 1 | 1 | 2 | 6  | 0 | 0 |
| 1 | 1 | 1 | 1 | 2  | 0 | 0 |
| 2 | 1 | 1 | 2 | 0  | 0 | 0 |
| 2 | 1 |   |   |    | 1 |   |
| 2 | 1 |   |   |    | 1 |   |
| 2 | 1 |   |   |    | 1 |   |
| 2 | 1 |   |   |    | 1 |   |
| 2 | 1 |   |   |    | 1 |   |
| 2 | 1 |   |   |    | 1 |   |
| 1 | 1 | 1 | 2 | 0  | 0 | 0 |
| 1 | 1 | 1 | 2 | 0  | 0 | 0 |
| 2 | 1 |   |   |    | 1 |   |
| 1 | 1 |   |   |    | 1 |   |
| 1 | 1 |   |   |    | 1 |   |
| 2 | 1 | 1 | 2 | 0  | 0 | 0 |
| 2 | 1 |   |   |    | 1 |   |
| 2 | 1 |   |   |    | 1 |   |
| 1 | 1 |   |   |    | 1 |   |
| 3 | 1 | 1 | 1 | 0  | 0 | 0 |
| 2 | 1 |   |   |    | 1 |   |
| 1 | 1 | 1 | 1 | 1  | 0 | 0 |
| 2 | 1 | 1 | 2 | 0  | 0 | 0 |
| 2 | 1 |   |   |    | 1 |   |
| 2 | 1 | 1 | 2 | 0  | 0 | 0 |
| 2 | 1 |   |   |    | 1 |   |
| 2 | 1 |   |   |    | 1 |   |
| 2 | 1 |   |   |    | 1 |   |
| 1 | 1 | 1 | 2 | 3  | 0 | 0 |
| 2 | 1 | 1 | 2 | 0  | 0 | 0 |
| 2 | 1 | 1 | 2 | 0  | 0 | 0 |
| 2 | 1 |   |   |    | 1 |   |
| 1 | 1 | 1 | 1 | 0  | 0 | 0 |
| 1 | 1 | 1 | 2 | 2  | 0 | 0 |
| 2 | 1 |   |   |    | 1 |   |
| 3 | 1 | 1 | 2 | 0  | 0 | 0 |
| 2 | 1 |   |   |    | 1 |   |
| 3 | 1 | 1 | 1 | 2  | 0 | 0 |
| 2 | 1 | 1 | 2 | 0  | 0 | 0 |
| 3 | 1 | 1 | 2 | 0  | 0 | 0 |
| 1 | 1 |   |   |    | 1 |   |
| 2 | 1 | 1 | 2 | 1  | 0 | 0 |
| 2 | 1 |   |   |    | 1 |   |
| 2 | 1 |   |   |    | 1 |   |

|   |   |   |   |     |   |   |
|---|---|---|---|-----|---|---|
| 1 | 1 |   |   |     | 1 |   |
| 2 | 1 |   |   |     | 1 |   |
| 2 | 1 |   |   |     | 1 |   |
| 1 | 1 |   |   |     | 1 |   |
| 2 | 1 |   |   |     | 1 |   |
| 2 | 1 | 1 | 2 | 0   | 0 | 0 |
| 1 | 1 |   |   |     | 1 |   |
| 3 | 1 | 1 | 2 | 2   | 0 | 0 |
| 2 | 1 |   |   |     | 1 |   |
| 1 | 1 | 1 | 2 | 117 | 0 | 1 |
| 2 | 1 | 1 | 1 | 0   | 0 | 0 |
| 2 | 1 | 1 | 2 | 0   | 0 | 0 |
| 2 | 1 | 1 | 2 | 0   | 0 | 0 |
| 2 | 1 |   |   |     | 1 |   |
| 3 | 1 | 1 | 2 | 0   | 0 | 0 |
| 2 | 1 | 1 | 2 | 0   | 0 | 0 |
| 2 | 1 | 1 | 1 | 0   | 0 | 0 |
| 2 | 1 |   |   |     | 1 |   |
| 2 | 1 |   |   |     | 1 |   |
| 2 | 1 |   |   |     | 1 |   |
| 2 | 1 |   |   |     | 1 |   |
| 2 | 1 | 1 | 2 | 0   | 0 | 0 |
| 1 | 1 |   |   |     | 1 |   |
| 2 | 1 |   |   |     | 1 |   |
| 2 | 1 |   |   |     | 1 |   |
| 3 | 1 | 1 | 2 | 0   | 0 | 0 |
| 2 | 1 |   |   |     | 1 |   |
| 2 | 1 |   |   |     | 1 |   |
| 2 | 1 | 1 | 2 | 0   | 0 | 0 |
| 2 | 1 | 1 | 2 | 3   | 0 | 0 |
| 2 | 1 | 1 | 1 | 0   | 0 | 0 |
| 2 | 1 |   |   |     | 1 |   |
| 2 | 1 |   |   |     | 1 |   |
| 2 | 1 |   |   |     | 1 |   |
| 1 | 1 | 1 | 2 | 5   | 0 | 0 |
| 1 | 1 | 1 | 2 | 0   | 0 | 0 |
| 2 | 1 | 1 | 2 | 0   | 0 | 0 |
| 1 | 1 | 1 | 1 | 1   | 0 | 0 |
| 2 | 1 |   |   |     | 1 |   |
| 2 | 1 | 1 | 2 | 0   | 0 | 0 |
| 2 | 1 | 1 | 2 | 0   | 0 | 0 |
| 1 | 1 | 1 | 2 | 3   | 0 | 0 |
| 2 | 1 | 1 | 2 | 0   | 0 | 0 |
| 1 | 1 | 1 | 2 | 1   | 0 | 0 |
| 2 | 1 |   |   |     | 1 |   |
| 2 | 1 |   |   |     | 1 |   |
| 2 | 1 |   |   |     | 1 |   |
| 2 | 1 |   |   |     | 1 |   |
| 1 | 1 |   |   |     | 1 |   |
| 2 | 1 | 1 | 2 | 0   | 0 | 0 |
| 2 | 1 | 1 | 1 | 0   | 0 | 0 |
| 2 | 1 |   |   |     | 1 |   |
| 1 | 1 |   |   |     | 1 |   |

|   |   |   |   |    |   |   |
|---|---|---|---|----|---|---|
| 2 | 1 | 1 | 2 | 0  | 0 | 0 |
| 2 | 1 |   |   |    | 1 |   |
| 2 | 1 |   |   |    | 1 |   |
| 1 | 1 | 1 | 2 | 9  | 0 | 1 |
| 2 | 1 |   |   |    | 1 |   |
| 2 | 1 | 1 | 2 | 0  | 0 | 0 |
| 1 | 1 |   |   |    | 1 |   |
| 3 | 1 | 1 | 2 | 0  | 0 | 0 |
| 2 | 1 |   |   |    | 1 |   |
| 1 | 1 | 1 | 2 | 0  | 0 | 0 |
| 1 | 1 | 1 | 2 | 5  | 0 | 0 |
| 2 | 1 | 1 | 2 | 0  | 0 | 0 |
| 1 | 1 | 1 | 2 | 0  | 0 | 0 |
| 2 | 1 |   |   |    | 1 |   |
| 1 | 1 | 1 | 1 | 8  | 0 | 1 |
| 2 | 1 |   |   |    | 1 |   |
| 1 | 1 | 1 | 2 | 5  | 0 | 0 |
| 1 | 1 |   |   |    | 1 |   |
| 2 | 1 |   |   |    | 1 |   |
| 2 | 1 | 1 | 2 | 0  | 0 | 0 |
| 3 | 1 | 1 | 2 | 76 | 0 | 1 |
| 3 | 1 | 1 | 2 | 0  | 0 | 0 |
| 2 | 1 |   |   |    | 1 |   |
| 1 | 1 |   |   |    | 1 |   |
| 3 | 1 | 1 | 1 | 0  | 0 | 0 |
| 2 | 1 |   |   |    | 1 |   |
| 2 | 1 | 1 | 2 | 0  | 0 | 0 |
| 2 | 1 | 1 | 2 | 0  | 0 | 0 |
| 2 | 1 | 1 | 2 | 0  | 0 | 0 |
| 1 | 1 |   |   |    | 1 |   |
| 1 | 1 | 1 | 2 | 17 | 0 | 1 |
| 3 | 1 | 1 | 2 | 1  | 0 | 0 |
| 2 | 1 | 2 | 1 | 76 | 0 | 1 |
| 2 | 1 |   |   |    | 1 |   |
| 2 | 1 | 1 | 1 | 1  | 0 | 0 |
| 1 | 1 | 1 | 2 | 7  | 0 | 0 |
| 2 | 1 |   |   |    | 1 |   |
| 1 | 1 | 1 | 2 | 1  | 0 | 0 |
| 3 | 1 | 1 | 1 | 0  | 0 | 0 |
| 2 | 1 |   |   |    | 1 |   |
| 2 | 1 |   |   |    | 1 |   |
| 1 | 1 | 1 | 2 | 2  | 0 | 0 |
| 2 | 1 |   |   |    | 1 |   |
| 2 | 1 |   |   |    | 1 |   |
| 2 | 1 |   |   |    | 1 |   |
| 1 | 1 | 1 | 2 | 3  | 0 | 0 |
| 1 | 1 | 1 | 2 | 0  | 0 | 0 |
| 1 | 1 | 1 | 2 | 0  | 0 | 0 |
| 2 | 1 | 1 | 1 | 0  | 0 | 0 |
| 2 | 1 |   |   |    | 1 |   |
| 2 | 1 |   |   |    | 1 |   |
| 2 | 1 |   |   |    | 1 |   |
| 2 | 1 |   |   |    | 1 |   |
| 1 | 1 | 1 | 2 | 2  | 0 | 0 |

|   |   |   |   |    |   |   |
|---|---|---|---|----|---|---|
| 3 | 1 | 1 | 2 | 1  | 0 | 0 |
| 2 | 1 |   |   |    | 1 |   |
| 2 | 1 | 1 | 2 | 0  | 0 | 0 |
| 1 | 1 | 1 | 2 | 2  | 0 | 0 |
| 2 | 1 |   |   |    | 1 |   |
| 2 | 1 |   |   |    | 1 |   |
| 1 | 1 |   |   |    | 1 |   |
| 2 | 1 | 1 | 2 | 3  | 0 | 0 |
| 2 | 1 | 1 | 2 | 0  | 0 | 0 |
| 1 | 1 |   |   |    | 1 |   |
| 2 | 1 | 1 | 2 | 0  | 0 | 0 |
| 2 | 1 |   |   |    | 1 |   |
| 2 | 1 | 1 | 1 | 0  | 0 | 0 |
| 3 | 1 | 1 | 1 | 6  | 0 | 0 |
| 2 | 1 |   |   |    | 1 |   |
| 2 | 1 |   |   |    | 1 |   |
| 2 | 1 |   |   |    | 1 |   |
| 1 | 1 | 1 | 2 | 0  | 0 | 0 |
| 2 | 1 | 1 | 2 | 0  | 0 | 0 |
| 2 | 1 | 2 | 2 | 0  | 0 | 0 |
| 3 | 1 | 1 | 1 | 0  | 0 | 0 |
| 2 | 1 |   |   |    | 1 |   |
| 1 | 1 |   |   |    | 1 |   |
| 2 | 1 | 1 | 2 | 0  | 0 | 0 |
| 1 | 1 | 1 | 2 | 0  | 0 | 0 |
| 1 | 1 | 1 | 2 | 2  | 0 | 0 |
| 3 | 1 | 1 | 2 | 9  | 0 | 1 |
| 1 | 1 | 1 | 2 | 0  | 0 | 0 |
| 2 | 1 |   |   |    | 1 |   |
| 2 | 1 |   |   |    | 1 |   |
| 2 | 1 | 1 | 2 | 27 | 0 | 1 |
| 2 | 1 |   |   |    | 1 |   |
| 2 | 1 | 1 | 2 | 0  | 0 | 0 |
| 3 | 1 | 1 | 2 | 0  | 0 | 0 |
| 1 | 1 | 1 | 2 | 0  | 0 | 0 |
| 2 | 1 |   |   |    | 1 |   |
| 2 | 1 | 1 | 2 | 0  | 0 | 0 |
| 2 | 1 | 1 | 2 | 0  | 0 | 0 |
| 2 | 1 |   |   |    | 1 |   |
| 2 | 1 |   |   |    | 1 |   |
| 3 | 1 | 1 | 1 | 26 | 0 | 1 |
| 2 | 1 | 1 | 2 | 20 | 0 | 1 |
| 2 | 1 | 1 | 2 | 0  | 0 | 0 |
| 3 | 1 | 1 | 2 | 0  | 0 | 0 |
| 2 | 1 |   |   |    | 1 |   |
| 2 | 1 | 1 | 2 | 0  | 0 | 0 |
| 3 | 1 | 1 | 2 | 0  | 0 | 0 |
| 2 | 1 | 1 | 2 | 0  | 0 | 0 |
| 1 | 1 | 1 | 2 | 0  | 0 | 0 |
| 2 | 1 | 1 | 2 | 3  | 0 | 0 |
| 2 | 1 |   |   |    | 1 |   |
| 2 | 1 |   |   |    | 1 |   |
| 2 | 1 |   |   |    | 1 |   |

|   |   |   |   |    |   |   |
|---|---|---|---|----|---|---|
| 2 | 1 |   |   |    | 1 |   |
| 2 | 1 | 1 | 2 | 0  | 0 | 0 |
| 2 | 1 | 1 | 1 | 0  | 0 | 0 |
| 2 | 1 | 1 | 2 | 0  | 0 | 0 |
| 1 | 1 | 1 | 2 | 0  | 0 | 0 |
| 3 | 1 | 1 | 1 | 5  | 0 | 0 |
| 3 | 1 | 1 | 1 | 11 | 0 | 1 |
| 2 | 1 |   |   |    | 1 |   |
| 3 | 1 | 1 | 2 | 0  | 0 | 0 |
| 2 | 1 | 1 | 2 | 2  | 0 | 0 |
| 2 | 1 |   |   |    | 1 |   |
| 2 | 1 | 1 | 2 | 0  | 0 | 0 |
| 2 | 1 | 1 | 2 | 0  | 0 | 0 |
| 1 | 1 | 1 | 2 | 1  | 0 | 0 |
| 2 | 1 |   |   |    | 1 |   |
| 2 | 1 |   |   |    | 1 |   |
| 2 | 1 | 1 | 2 | 15 | 0 | 1 |
| 3 | 1 | 1 | 2 | 0  | 0 | 0 |
| 3 | 1 | 1 | 2 | 0  | 0 | 0 |
| 3 | 1 | 1 | 1 | 0  | 0 | 0 |
| 2 | 1 | 1 | 2 | 0  | 0 | 0 |
| 2 | 1 |   |   |    | 1 |   |
| 1 | 1 | 1 | 1 | 0  | 0 | 0 |
| 3 | 1 | 1 | 2 | 0  | 0 | 0 |
| 2 | 1 |   |   |    | 1 |   |
| 2 | 1 | 1 | 2 | 0  | 0 | 0 |
| 1 | 1 | 1 | 2 | 0  | 0 | 0 |
| 2 | 1 |   |   |    | 1 |   |
| 1 | 1 |   |   |    | 1 |   |
| 1 | 1 |   |   |    | 1 |   |
| 2 | 1 | 1 | 1 | 0  | 0 | 0 |
| 2 | 1 | 1 | 1 | 0  | 0 | 0 |
| 2 | 1 | 1 | 1 | 0  | 0 | 0 |
| 3 | 1 | 1 | 2 | 14 | 0 | 1 |
| 2 | 1 |   |   |    | 1 |   |
| 1 | 1 | 1 | 2 | 0  | 0 | 0 |
| 1 | 1 |   |   |    | 1 |   |
| 2 | 1 | 1 | 2 | 0  | 0 | 0 |
| 1 | 1 |   |   |    | 1 |   |
| 1 | 1 | 1 | 2 | 31 | 0 | 1 |
| 2 | 1 |   |   |    | 1 |   |
| 1 | 1 | 1 | 1 | 1  | 0 | 0 |
| 1 | 1 |   |   |    | 1 |   |
| 3 | 1 | 1 | 1 | 0  | 0 | 0 |
| 2 | 1 |   |   |    | 1 |   |
| 2 | 1 |   |   |    | 1 |   |
| 2 | 1 |   |   |    | 1 |   |
| 1 | 1 | 1 | 2 | 3  | 0 | 0 |
| 2 | 1 | 1 | 2 | 0  | 0 | 0 |
| 2 | 1 |   |   |    | 1 |   |
| 1 | 1 | 1 | 1 | 0  | 0 | 0 |
| 2 | 1 |   |   |    | 1 |   |
| 2 | 1 | 1 | 2 | 0  | 0 | 0 |
| 2 | 1 |   |   |    | 1 |   |

|   |   |   |   |    |   |   |
|---|---|---|---|----|---|---|
| 2 | 1 |   |   |    | 1 |   |
| 2 | 1 | 1 | 1 | 0  | 0 | 0 |
| 2 | 1 |   |   |    | 1 |   |
| 2 | 1 | 1 | 2 | 0  | 0 | 0 |
| 1 | 1 | 1 | 2 | 12 | 0 | 1 |
| 3 | 1 | 1 | 2 | 1  | 0 | 0 |
| 2 | 1 |   |   |    | 1 |   |
| 2 | 1 |   |   |    | 1 |   |
| 1 | 1 | 1 | 2 | 20 | 0 | 1 |
| 2 | 1 |   |   |    | 1 |   |
| 2 | 1 |   |   |    | 1 |   |
| 2 | 1 |   |   |    | 1 |   |
| 2 | 1 | 1 | 1 | 0  | 0 | 0 |
| 2 | 1 |   |   |    | 1 |   |
| 1 | 1 |   |   |    | 1 |   |
| 2 | 1 |   |   |    | 1 |   |
| 2 | 1 | 1 | 2 | 0  | 0 | 0 |
| 2 | 1 | 1 | 2 | 0  | 0 | 0 |
| 2 | 1 |   |   |    | 1 |   |
| 1 | 1 | 1 | 1 | 0  | 0 | 0 |
| 3 | 1 | 1 | 2 | 0  | 0 | 0 |
| 3 | 1 | 1 | 2 | 14 | 0 | 1 |
| 2 | 1 |   |   |    | 1 |   |
| 2 | 1 |   |   |    | 1 |   |
| 1 | 1 | 1 | 2 | 6  | 0 | 0 |
| 2 | 1 |   |   |    | 1 |   |
| 2 | 1 |   |   |    | 1 |   |
| 1 | 1 | 1 | 2 | 3  | 0 | 0 |
| 2 | 1 | 1 | 2 | 0  | 0 | 0 |
| 3 | 1 | 1 | 2 | 10 | 0 | 1 |
| 2 | 1 |   |   |    | 1 |   |
| 2 | 1 |   |   |    | 1 |   |
| 1 | 1 | 1 | 2 | 0  | 0 | 0 |
| 2 | 1 |   |   |    | 1 |   |
| 1 | 1 |   |   |    | 1 |   |
| 2 | 1 |   |   |    | 1 |   |
| 2 | 1 | 1 | 2 | 0  | 0 | 0 |
| 1 | 1 | 1 | 2 | 0  | 0 | 0 |
| 1 | 1 | 1 | 2 | 2  | 0 | 0 |
| 2 | 1 |   |   |    | 1 |   |
| 3 | 1 | 1 | 2 | 20 | 0 | 1 |
| 2 | 1 | 1 | 1 | 1  | 0 | 0 |
| 2 | 1 | 1 | 2 | 0  | 0 | 0 |
| 2 | 1 | 1 | 2 | 0  | 0 | 0 |
| 2 | 1 | 1 | 2 | 0  | 0 | 0 |
| 1 | 1 | 1 | 2 | 35 | 0 | 1 |
| 3 | 1 | 1 | 1 | 0  | 0 | 0 |
| 2 | 1 | 1 | 2 | 0  | 0 | 0 |
| 1 | 1 | 1 | 1 | 0  | 0 | 0 |
| 2 | 1 | 2 | 1 | 1  | 0 | 0 |
| 3 | 1 | 1 | 2 | 1  | 0 | 0 |
| 2 | 1 |   |   |    | 1 |   |
| 2 | 1 | 1 | 2 | 0  | 0 | 0 |
| 2 | 1 | 1 | 2 | 0  | 0 | 0 |



|   |   |   |   |     |   |   |
|---|---|---|---|-----|---|---|
| 1 | 1 | 1 | 1 | 36  | 0 | 1 |
| 2 | 1 | 1 | 1 | 0   | 0 | 0 |
| 1 | 1 |   |   |     | 1 |   |
| 2 | 1 |   |   |     | 1 |   |
| 1 | 1 | 1 | 2 | 0   | 0 | 0 |
| 3 | 1 | 1 | 2 | 0   | 0 | 0 |
| 1 | 1 |   |   |     | 1 |   |
| 1 | 1 | 1 | 2 | 1   | 0 | 0 |
| 1 | 1 | 1 | 2 | 7   | 0 | 0 |
| 3 | 1 | 1 | 2 | 3   | 0 | 0 |
| 1 | 1 |   |   |     | 1 |   |
| 2 | 1 |   |   |     | 1 |   |
| 2 | 1 |   |   |     | 1 |   |
| 1 | 1 | 1 | 2 | 0   | 0 | 0 |
| 2 | 1 | 1 | 2 | 0   | 0 | 0 |
| 2 | 1 |   |   |     | 1 |   |
| 2 | 1 | 1 | 2 | 0   | 0 | 0 |
| 2 | 1 | 1 | 2 | 0   | 0 | 0 |
| 2 | 1 | 1 | 2 | 0   | 0 | 0 |
| 2 | 1 | 1 | 2 | 0   | 0 | 0 |
| 1 | 1 |   |   |     | 1 |   |
| 2 | 1 | 1 | 1 | 0   | 0 | 0 |
| 1 | 1 |   |   |     | 1 |   |
| 2 | 1 |   |   |     | 1 |   |
| 1 | 1 | 1 | 2 | 0   | 0 | 0 |
| 3 | 1 | 1 | 2 | 2   | 0 | 0 |
| 2 | 1 | 1 | 2 | 0   | 0 | 0 |
| 1 | 1 | 1 | 1 | 193 | 1 |   |
| 1 | 1 |   |   |     | 1 |   |
| 1 | 1 | 1 | 2 | 32  | 0 | 1 |
| 2 | 1 | 1 | 2 | 0   | 0 | 0 |
| 2 | 1 | 1 | 2 | 0   | 0 | 0 |
| 2 | 1 |   |   |     | 1 |   |
| 2 | 1 | 1 | 2 | 0   | 0 | 0 |
| 2 | 1 |   |   |     | 1 |   |
| 1 | 1 | 1 | 2 | 0   | 0 | 0 |
| 2 | 1 |   |   |     | 1 |   |
| 3 | 1 | 1 | 1 | 0   | 0 | 0 |
| 2 | 1 |   |   |     | 1 |   |
| 1 | 1 |   |   |     | 1 |   |
| 2 | 1 | 1 | 1 | 0   | 0 | 0 |
| 3 | 1 | 1 | 2 | 5   | 0 | 0 |
| 2 | 1 | 1 | 2 | 0   | 0 | 0 |
| 2 | 1 |   |   |     | 1 |   |
| 2 | 1 | 1 | 2 | 0   | 0 | 0 |
| 2 | 1 | 1 | 1 | 106 | 0 | 1 |
| 2 | 1 | 1 | 2 | 0   | 0 | 0 |
| 3 | 1 | 1 | 1 | 0   | 0 | 0 |
| 3 | 1 | 1 | 2 | 0   | 0 | 0 |
| 2 | 1 |   |   |     | 1 |   |
| 2 | 1 |   |   |     | 1 |   |
| 2 | 1 |   |   |     | 1 |   |
| 2 | 1 |   |   |     | 1 |   |
| 2 | 1 |   |   |     | 1 |   |

|   |   |   |   |    |   |   |
|---|---|---|---|----|---|---|
| 2 | 1 |   |   |    | 1 |   |
| 1 | 1 | 1 | 2 | 2  | 0 | 0 |
| 2 | 1 |   |   |    | 1 |   |
| 2 | 1 | 1 | 2 | 0  | 0 | 0 |
| 2 | 1 |   |   |    | 1 |   |
| 2 | 1 |   |   |    | 1 |   |
| 1 | 1 | 1 | 2 | 3  | 0 | 0 |
| 2 | 1 | 1 | 2 | 0  | 0 | 0 |
| 3 | 1 | 1 | 2 | 0  | 0 | 0 |
| 2 | 1 | 1 | 2 | 0  | 0 | 0 |
| 2 | 1 |   |   |    | 1 |   |
| 2 | 1 | 1 | 2 | 2  | 0 | 0 |
| 3 | 1 | 1 | 1 | 7  | 0 | 0 |
| 2 | 1 | 1 | 2 | 0  | 0 | 0 |
| 2 | 1 |   |   |    | 1 |   |
| 3 | 1 | 1 | 2 | 34 | 0 | 1 |
| 2 | 1 | 1 | 2 | 0  | 0 | 0 |
| 2 | 1 |   |   |    | 1 |   |
| 1 | 1 | 1 | 2 | 0  | 0 | 0 |
| 3 | 1 | 1 | 2 | 0  | 0 | 0 |
| 2 | 1 | 1 | 2 | 0  | 0 | 0 |
| 2 | 1 | 1 | 2 | 0  | 0 | 0 |
| 1 | 1 | 1 | 1 | 5  | 0 | 0 |
| 2 | 1 | 1 | 2 | 0  | 0 | 0 |
| 1 | 1 | 1 | 2 | 1  | 0 | 0 |
| 2 | 1 | 1 | 2 | 0  | 0 | 0 |
| 2 | 1 |   |   |    | 1 |   |
| 2 | 1 | 1 | 2 | 0  | 0 | 0 |
| 1 | 1 | 1 | 2 | 1  | 0 | 0 |
| 2 | 1 |   |   |    | 1 |   |
| 2 | 1 |   |   |    | 1 |   |
| 2 | 1 |   |   |    | 1 |   |
| 3 | 1 | 1 | 2 | 1  | 0 | 0 |
| 2 | 1 |   |   |    | 1 |   |
| 2 | 1 | 1 | 2 | 0  | 0 | 0 |
| 2 | 1 | 1 | 1 | 0  | 0 | 0 |
| 2 | 1 |   |   |    | 1 |   |
| 2 | 1 |   |   |    | 1 |   |
| 2 | 1 |   |   |    | 1 |   |
| 2 | 1 |   |   |    | 1 |   |
| 2 | 1 |   |   |    | 1 |   |
| 2 | 1 |   |   |    | 1 |   |
| 2 | 1 | 1 | 2 | 0  | 0 | 0 |
| 2 | 1 | 1 | 2 | 0  | 0 | 0 |
| 1 | 1 |   |   |    | 1 |   |
| 1 | 1 |   |   |    | 1 |   |
| 2 | 1 | 1 | 2 | 0  | 0 | 0 |
| 3 | 1 | 1 | 2 | 3  | 0 | 0 |
| 1 | 1 | 1 | 2 | 0  | 0 | 0 |
| 1 | 1 |   |   |    | 1 |   |
| 2 | 1 | 1 | 2 | 0  | 0 | 0 |

|   |   |   |   |     |   |   |
|---|---|---|---|-----|---|---|
| 2 | 1 | 1 | 2 | 0   | 0 | 0 |
| 1 | 1 | 1 | 2 | 2   | 0 | 0 |
| 2 | 1 | 1 | 2 | 0   | 0 | 0 |
| 3 | 1 | 1 | 2 | 0   | 0 | 0 |
| 2 | 1 | 1 | 2 | 0   | 0 | 0 |
| 2 | 1 |   |   |     | 1 |   |
| 3 | 1 | 1 | 1 | 0   | 0 | 0 |
| 2 | 1 | 1 | 2 | 0   | 0 | 0 |
| 1 | 1 | 1 | 2 | 0   | 0 | 0 |
| 2 | 1 |   |   |     | 1 |   |
| 2 | 1 |   |   |     | 1 |   |
| 2 | 1 |   |   |     | 1 |   |
| 2 | 1 |   |   |     | 1 |   |
| 2 | 1 |   |   |     | 1 |   |
| 2 | 1 |   |   |     | 1 |   |
| 2 | 1 | 1 | 2 | 0   | 0 | 0 |
| 3 | 1 | 1 | 2 | 6   | 0 | 0 |
| 2 | 1 |   |   |     | 1 |   |
| 2 | 1 | 1 | 2 | 0   | 0 | 0 |
| 2 | 1 |   |   |     | 1 |   |
| 2 | 1 |   |   |     | 1 |   |
| 1 | 1 | 1 | 2 | 0   | 0 | 0 |
| 2 | 1 |   |   |     | 1 |   |
| 2 | 1 |   |   |     | 1 |   |
| 2 | 1 | 1 | 2 | 3   | 0 | 0 |
| 1 | 1 | 1 | 2 | 0   | 0 | 0 |
| 2 | 1 | 1 | 1 | 0   | 0 | 0 |
| 1 | 1 |   |   |     | 1 |   |
| 3 | 1 | 1 | 2 | 35  | 0 | 1 |
| 2 | 1 | 1 | 2 | 1   | 0 | 0 |
| 2 | 1 |   |   |     | 1 |   |
| 2 | 1 |   |   |     | 1 |   |
| 2 | 1 |   |   |     | 1 |   |
| 3 | 1 | 1 | 2 | 0   | 0 | 0 |
| 2 | 1 |   |   |     | 1 |   |
| 2 | 1 |   |   |     | 1 |   |
| 1 | 1 | 1 | 1 | 5   | 0 | 0 |
| 3 | 1 | 1 | 2 | 8   | 0 | 1 |
| 2 | 1 |   |   |     | 1 |   |
| 2 | 1 | 1 | 1 | 1   | 0 | 0 |
| 1 | 1 | 1 | 2 | 0   | 0 | 0 |
| 2 | 1 | 1 | 2 | 0   | 0 | 0 |
| 2 | 1 | 1 | 2 | 0   | 0 | 0 |
| 1 | 1 |   |   |     | 1 |   |
| 3 | 1 | 1 | 2 | 0   | 0 | 0 |
| 2 | 1 |   |   |     | 1 |   |
| 3 | 1 | 1 | 2 | 118 | 0 | 1 |
| 1 | 1 | 1 | 2 | 21  | 0 | 1 |
| 2 | 1 |   |   |     | 1 |   |
| 1 | 1 | 1 | 2 | 1   | 0 | 0 |
| 2 | 1 |   |   |     | 1 |   |
| 2 | 1 | 1 | 2 | 0   | 0 | 0 |
| 2 | 1 |   |   |     | 1 |   |

|   |   |   |   |    |   |   |
|---|---|---|---|----|---|---|
| 1 | 1 | 1 | 2 | 1  | 0 | 0 |
| 2 | 1 |   |   |    | 1 |   |
| 3 | 1 | 1 | 1 | 3  | 0 | 0 |
| 2 | 1 | 1 | 2 | 0  | 0 | 0 |
| 1 | 1 |   |   |    | 1 |   |
| 1 | 1 | 1 | 2 | 1  | 0 | 0 |
| 2 | 1 |   |   |    | 1 |   |
| 2 | 1 |   |   |    | 1 |   |
| 2 | 1 |   |   |    | 1 |   |
| 2 | 1 |   |   |    | 1 |   |
| 2 | 1 |   |   |    | 1 |   |
| 3 | 1 | 1 | 1 | 2  | 0 | 0 |
| 2 | 1 |   |   |    | 1 |   |
| 2 | 1 |   |   |    | 1 |   |
| 2 | 1 | 1 | 2 | 0  | 0 | 0 |
| 2 | 1 |   |   |    | 1 |   |
| 2 | 1 | 1 | 2 | 0  | 0 | 0 |
| 2 | 1 |   |   |    | 1 |   |
| 2 | 1 | 1 | 2 | 1  | 0 | 0 |
| 1 | 1 | 1 | 2 | 0  | 0 | 0 |
| 2 | 1 | 1 | 2 | 0  | 0 | 0 |
| 1 | 1 |   |   |    | 1 |   |
| 3 | 1 | 1 | 2 | 0  | 0 | 0 |
| 1 | 1 | 1 | 2 | 28 | 0 | 1 |
| 2 | 1 |   |   |    | 1 |   |
| 2 | 1 |   |   |    | 1 |   |
| 2 | 1 | 1 | 2 | 0  | 0 | 0 |
| 2 | 1 | 2 | 1 | 0  | 0 | 0 |
| 2 | 1 |   |   |    | 1 |   |
| 2 | 1 | 1 | 2 | 0  | 0 | 0 |
| 2 | 1 |   |   |    | 1 |   |
| 3 | 1 | 1 | 2 | 0  | 0 | 0 |
| 1 | 1 | 1 | 2 | 0  | 0 | 0 |
| 3 | 1 | 1 | 2 | 55 | 0 | 1 |
| 2 | 1 |   |   |    | 1 |   |
| 2 | 1 |   |   |    | 1 |   |
| 2 | 1 |   |   |    | 1 |   |
| 1 | 1 | 1 | 2 | 55 | 0 | 1 |
| 1 | 1 |   |   |    | 1 |   |
| 1 | 1 | 1 | 2 | 2  | 0 | 0 |
| 1 | 1 |   |   |    | 1 |   |
| 2 | 1 | 1 | 2 | 0  | 0 | 0 |
| 2 | 1 |   |   |    | 1 |   |
| 2 | 1 | 1 | 2 | 0  | 0 | 0 |
| 3 | 1 | 1 | 2 | 2  | 0 | 0 |
| 2 | 1 | 1 | 1 | 38 | 0 | 1 |
| 2 | 1 |   |   |    | 1 |   |
| 1 | 1 | 1 | 2 | 0  | 0 | 0 |
| 2 | 1 |   |   |    | 1 |   |
| 2 | 1 | 1 | 2 | 0  | 0 | 0 |
| 2 | 1 | 1 | 1 | 0  | 0 | 0 |
| 2 | 1 | 1 | 1 | 0  | 0 | 0 |
| 2 | 1 |   |   |    | 1 |   |

|   |   |   |   |    |   |   |
|---|---|---|---|----|---|---|
| 3 | 1 | 1 | 2 | 1  | 0 | 0 |
| 2 | 1 |   |   |    | 1 |   |
| 2 | 1 | 1 | 2 | 0  | 0 | 0 |
| 2 | 1 |   |   |    | 1 |   |
| 2 | 1 |   |   |    | 1 |   |
| 1 | 1 |   |   |    | 1 |   |
| 2 | 1 |   |   |    | 1 |   |
| 2 | 1 |   |   |    | 1 |   |
| 2 | 1 |   |   |    | 1 |   |
| 1 | 1 |   |   |    | 1 |   |
| 2 | 1 |   |   |    | 1 |   |
| 2 | 1 |   |   |    | 1 |   |
| 2 | 1 |   |   |    | 1 |   |
| 2 | 1 | 1 | 2 | 0  | 0 | 0 |
| 1 | 1 |   |   |    | 1 |   |
| 2 | 1 |   |   |    | 1 |   |
| 3 | 1 | 1 | 1 | 0  | 0 | 0 |
| 2 | 1 |   |   |    | 1 |   |
| 2 | 1 |   |   |    | 1 |   |
| 2 | 1 | 1 | 2 | 31 | 0 | 1 |
| 1 | 1 | 1 | 1 | 1  | 0 | 0 |
| 2 | 1 | 1 | 2 | 0  | 0 | 0 |
| 2 | 1 |   |   |    | 1 |   |
| 2 | 1 |   |   |    | 1 |   |
| 2 | 1 |   |   |    | 1 |   |
| 2 | 1 |   |   |    | 1 |   |
| 2 | 1 | 2 | 1 | 0  | 0 | 0 |
| 2 | 1 | 1 | 2 | 0  | 0 | 0 |
| 2 | 1 | 1 | 2 | 0  | 0 | 0 |
| 1 | 1 |   |   |    | 1 |   |
| 1 | 1 |   |   |    | 1 |   |
| 1 | 1 |   |   |    | 1 |   |
| 3 | 1 | 1 | 2 | 0  | 0 | 0 |
| 2 | 1 | 1 | 2 | 0  | 0 | 0 |
| 2 | 1 |   |   |    | 1 |   |
| 3 | 1 | 1 | 2 | 0  | 0 | 0 |
| 2 | 1 | 2 | 1 | 1  | 0 | 0 |
| 2 | 1 | 1 | 2 | 7  | 0 | 0 |
| 2 | 1 | 1 | 2 | 0  | 0 | 0 |
| 1 | 1 |   |   |    | 1 |   |
| 2 | 1 | 1 | 2 | 0  | 0 | 0 |
| 2 | 1 | 1 | 2 | 0  | 0 | 0 |
| 2 | 1 | 1 | 2 | 0  | 0 | 0 |
| 2 | 1 |   |   |    | 1 |   |
| 1 | 1 | 1 | 2 | 4  | 0 | 0 |
| 2 | 1 | 1 | 1 | 0  | 0 | 0 |
| 2 | 1 | 1 | 2 | 0  | 0 | 0 |
| 2 | 1 |   |   |    | 1 |   |
| 2 | 1 |   |   |    | 1 |   |
| 2 | 1 |   |   |    | 1 |   |
| 2 | 1 | 1 | 1 | 4  | 0 | 0 |
| 1 | 1 | 1 | 1 | 5  | 0 | 0 |
| 1 | 1 |   |   |    | 1 |   |
| 2 | 1 |   |   |    | 1 |   |













|   |   |   |   |     |   |   |
|---|---|---|---|-----|---|---|
| 1 | 1 | 1 | 1 | 0   | 0 | 0 |
| 1 | 1 | 1 | 2 | 0   | 0 | 0 |
| 1 | 1 | 2 | 2 | 0   | 0 | 0 |
| 1 | 1 | 1 | 2 | 0   | 0 | 0 |
| 1 | 1 | 1 | 1 | 0   | 0 | 0 |
| 1 | 1 | 1 | 2 | 0   | 0 | 0 |
| 1 | 1 | 1 | 2 | 0   | 0 | 0 |
| 1 | 1 | 1 | 2 | 0   | 0 | 0 |
| 1 | 1 | 1 | 2 | 0   | 0 | 0 |
| 1 | 1 | 1 | 1 | 1   | 0 | 0 |
| 1 | 1 | 1 | 2 | 0   | 0 | 0 |
| 1 | 1 | 1 | 2 | 0   | 0 | 0 |
| 1 | 1 | 1 | 2 | 0   | 0 | 0 |
| 1 | 1 | 1 | 2 | 0   | 0 | 0 |
| 1 | 1 | 1 | 1 | 0   | 0 | 0 |
| 1 | 1 | 2 | 2 | 0   | 0 | 0 |
| 1 | 1 | 1 | 2 | 0   | 0 | 0 |
| 1 | 1 | 1 | 2 | 0   | 0 | 0 |
| 1 | 1 | 1 | 2 | 3   | 0 | 0 |
| 1 | 1 | 1 | 1 | 1   | 0 | 0 |
| 1 | 1 | 1 | 2 | 0   | 0 | 0 |
| 1 | 1 | 1 | 2 | 0   | 0 | 0 |
| 1 | 1 | 1 | 2 | 0   | 0 | 0 |
| 1 | 1 | 1 | 2 | 0   | 0 | 0 |
| 1 | 1 | 1 | 2 | 0   | 0 | 0 |
| 1 | 1 | 1 | 2 | 0   | 0 | 0 |
| 1 | 1 | 1 | 2 | 0   | 0 | 0 |
| 1 | 1 | 1 | 2 | 0   | 0 | 0 |
| 1 | 1 | 1 | 2 | 0   | 0 | 0 |
| 1 | 1 | 1 | 2 | 0   | 0 | 0 |
| 1 | 1 | 1 | 2 | 0   | 0 | 0 |
| 1 | 1 | 1 | 2 | 2   | 0 | 0 |
| 1 | 1 | 1 | 2 | 0   | 0 | 0 |
| 1 | 1 | 1 | 1 | 0   | 0 | 0 |
| 1 | 1 | 1 | 2 | 1   | 0 | 0 |
| 1 | 1 | 1 | 1 | 0   | 0 | 0 |
| 1 | 1 | 1 | 2 | 37  | 0 | 1 |
| 1 | 1 | 1 | 2 | 0   | 0 | 0 |
| 1 | 1 | 1 | 2 | 0   | 0 | 0 |
| 1 | 1 | 1 | 2 | 0   | 0 | 0 |
| 1 | 1 | 1 | 2 | 0   | 0 | 0 |
| 1 | 1 | 1 | 2 | 0   | 0 | 0 |
| 1 | 1 | 1 | 2 | 0   | 0 | 0 |
| 1 | 1 | 1 | 2 | 0   | 0 | 0 |
| 1 | 1 | 1 | 2 | 0   | 0 | 0 |
| 1 | 1 | 1 | 2 | 0   | 0 | 0 |
| 1 | 1 | 1 | 2 | 0   | 0 | 0 |
| 1 | 1 | 1 | 2 | 0   | 0 | 0 |
| 1 | 1 | 1 | 1 | 0   | 0 | 0 |
| 1 | 1 | 1 | 2 | 0   | 0 | 0 |
| 2 | 1 | 1 | 2 | 251 | 1 |   |
| 1 | 1 | 1 | 2 | 100 | 0 | 1 |
| 2 | 1 | 1 | 2 | 392 | 1 |   |
| 2 | 1 | 1 | 2 | 145 | 0 | 1 |
| 1 | 1 | 1 | 2 | 425 | 1 |   |
| 1 | 1 | 1 | 2 | 28  | 0 | 1 |
| 1 | 1 | 2 | 1 | 0   | 0 | 0 |

|   |   |   |   |     |   |   |
|---|---|---|---|-----|---|---|
| 1 | 1 |   |   |     | 1 |   |
| 1 | 1 | 1 | 1 | 20  | 0 | 1 |
| 1 | 1 |   |   |     | 1 |   |
| 1 | 1 | 1 | 2 | 6   | 0 | 0 |
| 1 | 1 |   |   |     | 1 |   |
| 1 | 1 |   |   |     | 1 |   |
| 1 | 1 | 1 | 2 | 13  | 0 | 1 |
| 1 | 1 | 1 | 2 | 11  | 0 | 1 |
| 1 | 1 |   |   |     | 1 |   |
| 1 | 1 |   |   |     | 1 |   |
| 1 | 1 | 1 | 2 | 31  | 0 | 1 |
| 1 | 1 |   |   |     | 1 |   |
| 1 | 1 |   |   |     | 1 |   |
| 1 | 1 |   |   |     | 1 |   |
| 1 | 1 | 1 | 2 | 20  | 0 | 1 |
| 1 | 1 | 1 | 2 | 58  | 0 | 1 |
| 1 | 1 | 1 | 1 | 21  | 0 | 1 |
| 1 | 1 | 1 | 1 | 0   | 0 | 0 |
| 1 | 1 |   |   |     | 1 |   |
| 1 | 1 | 1 | 1 | 45  | 0 | 1 |
| 1 | 1 | 1 | 1 | 38  | 0 | 1 |
| 1 | 1 | 2 | 1 | 0   | 0 | 0 |
| 1 | 1 | 1 | 2 | 13  | 0 | 1 |
| 1 | 1 | 1 | 2 | 39  | 0 | 1 |
| 1 | 1 | 1 | 1 | 5   | 0 | 0 |
| 1 | 1 | 1 | 1 | 29  | 0 | 1 |
| 1 | 1 |   |   |     | 1 |   |
| 1 | 1 |   |   |     | 1 |   |
| 1 | 1 | 1 | 1 | 18  | 0 | 1 |
| 1 | 1 | 1 | 1 | 2   | 0 | 0 |
| 1 | 1 | 1 | 1 | 8   | 0 | 1 |
| 1 | 1 | 1 | 2 | 13  | 0 | 1 |
| 1 | 1 |   |   |     | 1 |   |
| 1 | 1 |   |   |     | 1 |   |
| 1 | 1 | 1 | 1 | 13  | 0 | 1 |
| 1 | 1 | 1 | 2 | 44  | 0 | 1 |
| 1 | 1 | 1 | 2 | 0   | 0 | 0 |
| 1 | 1 | 1 | 1 | 0   | 0 | 0 |
| 1 | 1 |   |   |     | 1 |   |
| 1 | 1 | 1 | 2 | 5   | 0 | 0 |
| 1 | 1 | 1 | 1 | 56  | 0 | 1 |
| 1 | 1 | 1 | 1 | 0   | 0 | 0 |
| 1 | 1 | 1 | 1 | 37  | 0 | 1 |
| 1 | 1 | 1 | 1 | 124 | 0 | 1 |
| 1 | 1 | 1 | 1 | 7   | 0 | 0 |
| 1 | 1 | 1 | 1 | 1   | 0 | 0 |
| 1 | 1 | 1 | 1 | 50  | 0 | 1 |
| 1 | 1 | 2 | 2 | 2   | 0 | 0 |
| 1 | 1 | 1 | 1 | 9   | 0 | 1 |
| 1 | 1 | 1 | 1 | 5   | 0 | 0 |
| 1 | 1 | 1 | 1 | 4   | 0 | 0 |
| 1 | 1 | 1 | 1 | 34  | 0 | 1 |
| 1 | 1 | 1 | 2 | 24  | 0 | 1 |
| 1 | 1 | 2 | 1 | 10  | 0 | 1 |

|   |   |   |   |     |   |   |
|---|---|---|---|-----|---|---|
| 1 | 1 |   |   |     | 1 |   |
| 1 | 1 | 1 | 1 | 0   | 0 | 0 |
| 1 | 1 | 1 | 2 | 8   | 0 | 1 |
| 1 | 1 |   |   |     | 1 |   |
| 1 | 1 | 1 | 1 | 7   | 0 | 0 |
| 1 | 1 |   |   |     | 1 |   |
| 1 | 1 | 1 | 2 | 21  | 0 | 1 |
| 1 | 1 | 1 | 1 | 5   | 0 | 0 |
| 1 | 1 | 2 | 1 | 20  | 0 | 1 |
| 1 | 1 | 1 | 1 | 15  | 0 | 1 |
| 1 | 1 | 1 | 1 | 28  | 0 | 1 |
| 1 | 1 | 1 | 2 | 31  | 0 | 1 |
| 1 | 1 |   |   |     | 1 |   |
| 1 | 1 |   |   |     | 1 |   |
| 1 | 1 | 1 | 1 | 116 | 0 | 1 |
| 1 | 1 | 1 | 2 | 61  | 0 | 1 |
| 1 | 1 | 1 | 1 | 3   | 0 | 0 |
| 1 | 1 |   |   |     | 1 |   |
| 1 | 1 | 1 | 2 | 14  | 0 | 1 |
| 1 | 1 |   |   |     | 1 |   |
| 1 | 1 | 1 | 2 | 23  | 0 | 1 |
| 1 | 1 | 1 | 2 | 15  | 0 | 1 |
| 1 | 1 | 1 | 2 | 3   | 0 | 0 |
| 1 | 1 | 1 | 2 | 8   | 0 | 1 |
| 1 | 1 | 1 | 2 | 0   | 0 | 0 |
| 1 | 1 | 1 | 2 | 5   | 0 | 0 |
| 1 | 1 | 1 | 1 | 0   | 0 | 0 |
| 1 | 1 | 1 | 2 | 0   | 0 | 0 |
| 1 | 1 | 1 | 1 | 26  | 0 | 1 |
| 1 | 1 | 2 | 1 | 21  | 0 | 1 |
| 1 | 1 | 1 | 1 | 5   | 0 | 0 |
| 1 | 1 |   |   |     | 1 |   |
| 1 | 1 | 1 | 2 | 12  | 0 | 1 |
| 1 | 1 | 1 | 2 | 33  | 0 | 1 |
| 1 | 1 | 2 | 1 | 0   | 0 | 0 |
| 1 | 1 |   |   |     | 1 |   |
| 1 | 1 | 1 | 1 | 69  | 0 | 1 |
| 1 | 1 |   |   |     | 1 |   |
| 1 | 1 | 1 | 1 | 29  | 0 | 1 |
| 1 | 1 | 1 | 2 | 25  | 0 | 1 |
| 1 | 1 | 1 | 1 | 5   | 0 | 0 |
| 1 | 1 | 1 | 2 | 0   | 0 | 0 |
| 1 | 1 | 1 | 1 | 3   | 0 | 0 |
| 1 | 1 | 1 | 2 | 16  | 0 | 1 |
| 1 | 1 | 1 | 1 | 7   | 0 | 0 |
| 1 | 1 | 1 | 2 | 21  | 0 | 1 |
| 1 | 1 |   |   |     | 1 |   |
| 1 | 1 |   |   |     | 1 |   |
| 1 | 1 | 1 | 1 | 46  | 0 | 1 |
| 1 | 1 | 1 | 2 | 315 | 1 |   |
| 1 | 1 |   |   |     | 1 |   |
| 1 | 1 | 1 | 2 | 0   | 0 | 0 |
| 1 | 1 | 1 | 1 | 22  | 0 | 1 |
| 1 | 1 | 1 | 1 | 17  | 0 | 1 |

|   |   |   |   |    |   |   |
|---|---|---|---|----|---|---|
| 1 | 1 | 1 | 2 | 18 | 0 | 1 |
| 1 | 1 | 1 | 1 | 7  | 0 | 0 |
| 1 | 1 | 1 | 2 | 18 | 0 | 1 |
| 1 | 1 |   |   |    | 1 |   |
| 1 | 1 | 1 | 1 | 22 | 0 | 1 |
| 1 | 1 |   |   |    | 1 |   |
| 1 | 1 | 1 | 1 | 16 | 0 | 1 |
| 1 | 1 |   |   |    | 1 |   |
| 1 | 1 | 1 | 1 | 27 | 0 | 1 |
| 1 | 1 | 1 | 2 | 0  | 0 | 0 |
| 1 | 1 | 1 | 2 | 17 | 0 | 1 |
| 1 | 1 | 1 | 1 | 19 | 0 | 1 |
| 1 | 1 |   |   |    | 1 |   |
| 1 | 1 | 1 | 2 | 26 | 0 | 1 |
| 1 | 1 | 1 | 1 | 12 | 0 | 1 |
| 1 | 1 |   |   |    | 1 |   |
| 1 | 1 |   |   |    | 1 |   |
| 1 | 1 | 1 | 1 | 2  | 0 | 0 |
| 1 | 1 | 1 | 1 | 6  | 0 | 0 |
| 1 | 1 | 1 | 2 | 15 | 0 | 1 |
| 1 | 1 |   |   |    | 1 |   |
| 1 | 1 |   |   |    | 1 |   |
| 1 | 1 | 1 | 2 | 2  | 0 | 0 |
| 1 | 1 | 1 | 1 | 41 | 0 | 1 |
| 1 | 1 |   |   |    | 1 |   |
| 1 | 1 | 1 | 1 | 8  | 0 | 1 |
| 1 | 1 | 1 | 2 | 5  | 0 | 0 |
| 1 | 1 | 1 | 2 | 27 | 0 | 1 |
| 1 | 1 |   |   |    | 1 |   |
| 1 | 1 | 1 | 1 | 7  | 0 | 0 |
| 1 | 1 | 1 | 1 | 51 | 0 | 1 |
| 1 | 1 |   |   |    | 1 |   |
| 1 | 1 | 1 | 2 | 27 | 0 | 1 |
| 1 | 1 | 1 | 2 | 13 | 0 | 1 |
| 1 | 1 |   |   |    | 1 |   |
| 1 | 1 | 1 | 1 | 42 | 0 | 1 |
| 1 | 1 |   |   |    | 1 |   |
| 1 | 1 | 1 | 1 | 11 | 0 | 1 |
| 1 | 1 | 1 | 1 | 39 | 0 | 1 |
| 1 | 1 |   |   |    | 1 |   |
| 1 | 1 | 1 | 1 | 27 | 0 | 1 |
| 1 | 1 |   |   |    | 1 |   |
| 1 | 1 | 1 | 1 | 81 | 0 | 1 |
| 1 | 1 | 1 | 2 | 9  | 0 | 1 |
| 1 | 1 |   |   |    | 1 |   |
| 1 | 1 | 1 | 2 | 17 | 0 | 1 |
| 1 | 1 | 1 | 2 | 12 | 0 | 1 |
| 1 | 1 | 1 | 2 | 2  | 0 | 0 |
| 1 | 1 |   |   |    | 1 |   |
| 1 | 1 | 1 | 1 | 21 | 0 | 1 |
| 1 | 1 | 1 | 1 | 6  | 0 | 0 |
| 1 | 1 | 1 | 2 | 24 | 0 | 1 |
| 1 | 1 | 1 | 2 | 44 | 0 | 1 |
| 1 | 1 | 1 | 1 | 6  | 0 | 0 |

|   |   |   |   |    |   |   |
|---|---|---|---|----|---|---|
| 1 | 1 |   |   |    | 1 |   |
| 1 | 1 | 1 | 2 | 72 | 0 | 1 |
| 1 | 1 | 1 | 1 | 0  | 0 | 0 |
| 1 | 1 | 1 | 2 | 17 | 0 | 1 |
| 1 | 1 |   |   |    | 1 |   |
| 1 | 1 |   |   |    | 1 |   |
| 1 | 1 | 1 | 2 | 4  | 0 | 0 |
| 1 | 1 | 1 | 2 | 27 | 0 | 1 |
| 1 | 1 | 1 | 2 | 0  | 0 | 0 |
| 1 | 1 | 1 | 1 | 16 | 0 | 1 |
| 1 | 1 |   |   |    | 1 |   |
| 1 | 1 | 1 | 1 | 10 | 0 | 1 |
| 1 | 1 | 1 | 1 | 8  | 0 | 1 |
| 1 | 1 | 1 | 1 | 21 | 0 | 1 |
| 1 | 1 |   |   |    | 1 |   |
| 1 | 1 |   |   |    | 1 |   |
| 1 | 1 | 1 | 2 | 1  | 0 | 0 |
| 1 | 1 |   |   |    | 1 |   |
| 1 | 1 |   |   |    | 1 |   |
| 1 | 1 | 1 | 1 | 20 | 0 | 1 |
| 1 | 1 | 1 | 1 | 8  | 0 | 1 |
| 1 | 1 | 1 | 1 | 20 | 0 | 1 |
| 1 | 1 | 1 | 2 | 17 | 0 | 1 |
| 1 | 1 | 1 | 1 | 29 | 0 | 1 |
| 1 | 1 |   |   |    | 1 |   |
| 1 | 1 | 1 | 1 | 17 | 0 | 1 |
| 1 | 1 |   |   |    | 1 |   |
| 1 | 1 | 1 | 2 | 21 | 0 | 1 |
| 1 | 1 | 1 | 1 | 11 | 0 | 1 |
| 1 | 1 | 1 | 1 | 10 | 0 | 1 |
| 1 | 1 | 1 | 1 | 18 | 0 | 1 |
| 1 | 1 | 1 | 2 | 7  | 0 | 0 |
| 1 | 1 | 1 | 2 | 34 | 0 | 1 |
| 1 | 1 | 1 | 1 | 5  | 0 | 0 |
| 1 | 1 |   |   |    | 1 |   |
| 1 | 1 | 1 | 1 | 60 | 0 | 1 |
| 1 | 1 |   |   |    | 1 |   |
| 1 | 1 | 1 | 2 | 4  | 0 | 0 |
| 1 | 1 | 1 | 2 | 22 | 0 | 1 |
| 1 | 1 |   |   |    | 1 |   |
| 1 | 1 | 1 | 1 | 13 | 0 | 1 |
| 1 | 1 | 1 | 2 | 29 | 0 | 1 |
| 1 | 1 |   |   |    | 1 |   |
| 1 | 1 | 1 | 1 | 28 | 0 | 1 |
| 1 | 1 |   |   |    | 1 |   |
| 1 | 1 | 1 | 2 | 57 | 0 | 1 |
| 1 | 1 | 1 | 2 | 6  | 0 | 0 |
| 1 | 1 |   |   |    | 1 |   |
| 1 | 1 | 2 | 1 | 12 | 0 | 1 |
| 1 | 1 | 1 | 2 | 0  | 0 | 0 |
| 1 | 1 | 1 | 1 | 36 | 0 | 1 |
| 1 | 1 | 1 | 2 | 34 | 0 | 1 |
| 1 | 1 | 1 | 1 | 8  | 0 | 1 |
| 1 | 1 | 1 | 1 | 10 | 0 | 1 |

|   |   |   |   |     |   |   |
|---|---|---|---|-----|---|---|
| 1 | 1 | 1 | 2 | 3   | 0 | 0 |
| 1 | 1 | 1 | 1 | 8   | 0 | 1 |
| 1 | 1 | 1 | 1 | 7   | 0 | 0 |
| 1 | 1 | 1 | 1 | 204 | 1 |   |
| 1 | 1 |   |   |     | 1 |   |
| 1 | 1 | 1 | 1 | 25  | 0 | 1 |
| 1 | 1 | 1 | 2 | 22  | 0 | 1 |
| 1 | 1 | 1 | 2 | 12  | 0 | 1 |
| 1 | 1 | 1 | 2 | 25  | 0 | 1 |
| 1 | 1 | 1 | 2 | 16  | 0 | 1 |
| 1 | 1 |   |   |     | 1 |   |
| 1 | 1 | 1 | 1 | 46  | 0 | 1 |
| 1 | 1 |   |   |     | 1 |   |
| 1 | 1 | 1 | 2 | 95  | 0 | 1 |
| 1 | 1 | 1 | 1 | 22  | 0 | 1 |
| 1 | 1 | 1 | 1 | 33  | 0 | 1 |
| 1 | 1 | 1 | 2 | 29  | 0 | 1 |
| 1 | 1 |   |   |     | 1 |   |
| 1 | 1 | 1 | 1 | 53  | 0 | 1 |
| 1 | 1 | 1 | 2 | 30  | 0 | 1 |
| 1 | 1 |   |   |     | 1 |   |
| 1 | 1 | 1 | 1 | 10  | 0 | 1 |
| 1 | 1 | 1 | 2 | 10  | 0 | 1 |
| 1 | 1 | 2 | 2 | 1   | 0 | 0 |
| 1 | 1 |   |   |     | 1 |   |
| 1 | 1 | 1 | 1 | 18  | 0 | 1 |
| 1 | 1 | 2 | 1 | 0   | 0 | 0 |
| 1 | 1 | 1 | 1 | 12  | 0 | 1 |
| 1 | 1 | 1 | 1 | 33  | 0 | 1 |
| 1 | 1 |   |   |     | 1 |   |
| 1 | 1 | 1 | 1 | 11  | 0 | 1 |
| 1 | 1 | 1 | 1 | 6   | 0 | 0 |
| 1 | 1 | 1 | 1 | 4   | 0 | 0 |
| 1 | 1 | 1 | 1 | 24  | 0 | 1 |
| 1 | 1 | 1 | 2 | 29  | 0 | 1 |
| 1 | 1 |   |   |     | 1 |   |
| 1 | 1 | 1 | 2 | 32  | 0 | 1 |
| 1 | 1 | 1 | 2 | 26  | 0 | 1 |
| 1 | 1 | 1 | 2 | 43  | 0 | 1 |
| 1 | 1 | 1 | 2 | 0   | 0 | 0 |
| 1 | 1 | 1 | 1 | 23  | 0 | 1 |
| 1 | 1 | 1 | 1 | 6   | 0 | 0 |
| 1 | 1 | 1 | 2 | 60  | 0 | 1 |
| 1 | 1 | 1 | 2 | 13  | 0 | 1 |
| 1 | 1 | 1 | 1 | 28  | 0 | 1 |
| 1 | 1 | 1 | 1 | 39  | 0 | 1 |
| 1 | 1 |   |   |     | 1 |   |
| 1 | 1 | 1 | 2 | 19  | 0 | 1 |
| 1 | 1 |   |   |     | 1 |   |
| 1 | 1 | 1 | 2 | 11  | 0 | 1 |
| 1 | 1 | 1 | 1 | 5   | 0 | 0 |
| 1 | 1 |   |   |     | 1 |   |
| 1 | 1 | 1 | 2 | 12  | 0 | 1 |
| 1 | 1 |   |   |     | 1 |   |



|   |   |   |   |     |   |   |
|---|---|---|---|-----|---|---|
| 1 | 1 | 1 | 2 | 57  | 0 | 1 |
| 1 | 1 |   |   |     | 1 |   |
| 1 | 1 | 2 | 1 | 8   | 0 | 1 |
| 1 | 1 | 1 | 1 | 14  | 0 | 1 |
| 1 | 1 | 1 | 1 | 23  | 0 | 1 |
| 1 | 1 | 1 | 2 | 15  | 0 | 1 |
| 1 | 1 | 1 | 1 | 8   | 0 | 1 |
| 1 | 1 | 1 | 2 | 10  | 0 | 1 |
| 1 | 1 |   |   |     | 1 |   |
| 1 | 1 | 1 | 1 | 9   | 0 | 1 |
| 1 | 1 | 1 | 1 | 13  | 0 | 1 |
| 1 | 1 | 1 | 2 | 10  | 0 | 1 |
| 1 | 1 | 1 | 1 | 8   | 0 | 1 |
| 1 | 1 | 1 | 2 | 1   | 0 | 0 |
| 1 | 1 | 2 | 1 | 0   | 0 | 0 |
| 1 | 1 | 1 | 2 | 29  | 0 | 1 |
| 1 | 1 | 1 | 1 | 16  | 0 | 1 |
| 1 | 1 | 1 | 1 | 6   | 0 | 0 |
| 1 | 1 | 1 | 2 | 17  | 0 | 1 |
| 1 | 1 | 1 | 1 | 18  | 0 | 1 |
| 1 | 1 | 1 | 1 | 8   | 0 | 1 |
| 1 | 1 | 1 | 2 | 9   | 0 | 1 |
| 1 | 1 | 1 | 1 | 14  | 0 | 1 |
| 1 | 1 | 1 | 2 | 34  | 0 | 1 |
| 1 | 1 | 1 | 1 | 12  | 0 | 1 |
| 1 | 1 |   |   |     | 1 |   |
| 1 | 1 | 1 | 1 | 25  | 0 | 1 |
| 1 | 1 | 1 | 1 | 24  | 0 | 1 |
| 1 | 1 | 1 | 2 | 5   | 0 | 0 |
| 1 | 1 | 1 | 1 | 29  | 0 | 1 |
| 1 | 1 |   |   |     | 1 |   |
| 1 | 1 |   |   |     | 1 |   |
| 1 | 1 | 1 | 1 | 23  | 0 | 1 |
| 1 | 1 | 1 | 1 | 19  | 0 | 1 |
| 1 | 1 | 1 | 1 | 7   | 0 | 0 |
| 1 | 1 | 1 | 1 | 47  | 0 | 1 |
| 1 | 1 | 1 | 2 | 14  | 0 | 1 |
| 1 | 1 | 2 | 1 | 28  | 0 | 1 |
| 1 | 1 | 1 | 2 | 30  | 0 | 1 |
| 1 | 1 | 1 | 1 | 109 | 0 | 1 |
| 1 | 1 | 1 | 2 | 0   | 0 | 0 |
| 1 | 1 | 1 | 2 | 7   | 0 | 0 |
| 1 | 1 | 1 | 1 | 7   | 0 | 0 |
| 1 | 1 | 1 | 2 | 17  | 0 | 1 |
| 1 | 1 | 1 | 2 | 9   | 0 | 1 |
| 1 | 1 | 1 | 2 | 1   | 0 | 0 |
| 1 | 1 | 1 | 1 | 33  | 0 | 1 |
| 1 | 1 | 1 | 2 | 8   | 0 | 1 |
| 1 | 1 | 2 | 1 | 38  | 0 | 1 |
| 1 | 1 | 1 | 1 | 20  | 0 | 1 |
| 1 | 1 |   |   |     | 1 |   |
| 1 | 1 | 1 | 1 | 25  | 0 | 1 |
| 1 | 1 | 1 | 2 | 47  | 0 | 1 |
| 1 | 1 | 1 | 2 | 9   | 0 | 1 |

|   |   |   |   |    |   |   |
|---|---|---|---|----|---|---|
| 1 | 1 | 1 | 1 | 3  | 0 | 0 |
| 1 | 1 |   |   |    | 1 |   |
| 1 | 1 | 1 | 2 | 0  | 0 | 0 |
| 1 | 1 | 1 | 1 | 22 | 0 | 1 |
| 1 | 1 |   |   |    | 1 |   |
| 1 | 1 | 1 | 2 | 54 | 0 | 1 |
| 1 | 1 | 1 | 1 | 14 | 0 | 1 |
| 1 | 1 |   |   |    | 1 |   |
| 1 | 1 | 1 | 2 | 0  | 0 | 0 |
| 1 | 1 | 1 | 1 | 13 | 0 | 1 |
| 1 | 1 | 1 | 2 | 5  | 0 | 0 |
| 1 | 1 |   |   |    | 1 |   |
| 1 | 1 | 1 | 2 | 15 | 0 | 1 |
| 1 | 1 | 1 | 2 | 5  | 0 | 0 |
| 1 | 1 |   |   |    | 1 |   |
| 1 | 1 | 1 | 1 | 5  | 0 | 0 |
| 1 | 1 | 2 | 2 | 1  | 0 | 0 |
| 1 | 1 | 1 | 2 | 61 | 0 | 1 |
| 1 | 1 | 1 | 2 | 5  | 0 | 0 |
| 1 | 1 | 1 | 2 | 12 | 0 | 1 |
| 1 | 1 | 1 | 1 | 3  | 0 | 0 |
| 1 | 1 | 1 | 1 | 6  | 0 | 0 |
| 1 | 1 | 1 | 1 | 5  | 0 | 0 |
| 1 | 1 | 1 | 1 | 6  | 0 | 0 |
| 1 | 1 | 1 | 1 | 6  | 0 | 0 |
| 1 | 1 | 1 | 1 | 3  | 0 | 0 |
| 1 | 1 | 1 | 1 | 15 | 0 | 1 |
| 1 | 1 | 1 | 1 | 2  | 0 | 0 |
| 1 | 1 | 1 | 1 | 1  | 0 | 0 |
| 1 | 1 | 1 | 1 | 7  | 0 | 0 |
| 1 | 1 | 1 | 1 | 6  | 0 | 0 |
| 1 | 1 | 1 | 1 | 4  | 0 | 0 |
| 1 | 1 | 1 | 1 | 1  | 0 | 0 |
| 1 | 1 | 1 | 1 | 3  | 0 | 0 |
| 1 | 1 | 1 | 1 | 4  | 0 | 0 |
| 1 | 1 | 1 | 1 | 3  | 0 | 0 |
| 1 | 1 | 1 | 1 | 3  | 0 | 0 |
| 1 | 1 | 1 | 1 | 7  | 0 | 0 |
| 1 | 1 | 1 | 2 | 20 | 0 | 1 |
| 1 | 1 | 1 | 2 | 9  | 0 | 1 |
| 1 | 1 | 1 | 1 | 7  | 0 | 0 |
| 1 | 1 | 1 | 2 | 5  | 0 | 0 |
| 1 | 1 | 1 | 2 | 5  | 0 | 0 |
| 1 | 1 | 1 | 2 | 5  | 0 | 0 |
| 1 | 1 | 1 | 1 | 7  | 0 | 0 |
| 1 | 1 | 1 | 2 | 3  | 0 | 0 |
| 1 | 1 | 1 | 2 | 9  | 0 | 1 |
| 1 | 1 | 1 | 2 | 8  | 0 | 1 |
| 1 | 1 | 1 | 2 | 7  | 0 | 0 |
| 1 | 1 | 1 | 1 | 7  | 0 | 0 |
| 1 | 1 | 1 | 2 | 7  | 0 | 0 |
| 1 | 1 | 1 | 1 | 6  | 0 | 0 |
| 1 | 1 | 1 | 2 | 5  | 0 | 0 |
| 1 | 1 | 1 | 1 | 5  | 0 | 0 |

|   |   |   |   |    |   |   |
|---|---|---|---|----|---|---|
| 1 | 1 | 1 | 1 | 5  | 0 | 0 |
| 1 | 1 | 1 | 1 | 1  | 0 | 0 |
| 1 | 1 | 2 | 1 | 2  | 0 | 0 |
| 1 | 1 | 1 | 2 | 7  | 0 | 0 |
| 1 | 1 | 1 | 2 | 4  | 0 | 0 |
| 1 | 1 | 1 | 2 | 2  | 0 | 0 |
| 1 | 1 | 1 | 2 | 2  | 0 | 0 |
| 1 | 1 | 1 | 1 | 5  | 0 | 0 |
| 1 | 1 | 1 | 1 | 7  | 0 | 0 |
| 1 | 1 | 1 | 1 | 7  | 0 | 0 |
| 1 | 1 | 1 | 2 | 15 | 0 | 1 |
| 1 | 1 | 1 | 2 | 4  | 0 | 0 |
| 1 | 1 | 1 | 1 | 21 | 0 | 1 |
| 1 | 1 | 1 | 2 | 16 | 0 | 1 |
| 1 | 1 | 1 | 2 | 4  | 0 | 0 |
| 1 | 1 | 1 | 1 | 2  | 0 | 0 |
| 1 | 1 | 1 | 1 | 2  | 0 | 0 |
| 1 | 1 | 1 | 2 | 6  | 0 | 0 |
| 1 | 1 | 1 | 2 | 6  | 0 | 0 |
| 1 | 1 | 1 | 1 | 15 | 0 | 1 |
| 1 | 1 | 1 | 2 | 3  | 0 | 0 |
| 1 | 1 | 1 | 1 | 2  | 0 | 0 |
| 1 | 1 | 1 | 1 | 13 | 0 | 1 |
| 1 | 1 | 1 | 2 | 12 | 0 | 1 |
| 1 | 1 | 1 | 1 | 13 | 0 | 1 |
| 1 | 1 | 2 | 1 | 3  | 0 | 0 |
| 1 | 1 | 1 | 1 | 6  | 0 | 0 |
| 1 | 1 | 1 | 1 | 8  | 0 | 1 |
| 1 | 1 | 1 | 1 | 11 | 0 | 1 |
| 1 | 1 | 1 | 2 | 27 | 0 | 1 |
| 1 | 1 | 1 | 1 | 6  | 0 | 0 |
| 1 | 1 | 1 | 1 | 6  | 0 | 0 |
| 1 | 1 | 2 | 1 | 26 | 0 | 1 |
| 1 | 1 | 1 | 1 | 2  | 0 | 0 |
| 1 | 1 | 1 | 1 | 2  | 0 | 0 |
| 1 | 1 | 1 | 2 | 2  | 0 | 0 |
| 1 | 1 | 1 | 1 | 6  | 0 | 0 |
| 1 | 1 | 1 | 2 | 6  | 0 | 0 |
| 1 | 1 | 1 | 1 | 2  | 0 | 0 |
| 1 | 1 | 1 | 1 | 4  | 0 | 0 |
| 1 | 1 | 1 | 1 | 5  | 0 | 0 |
| 1 | 1 | 1 | 1 | 4  | 0 | 0 |
| 1 | 1 | 1 | 2 | 2  | 0 | 0 |
| 1 | 1 | 1 | 1 | 2  | 0 | 0 |
| 1 | 1 | 1 | 2 | 5  | 0 | 0 |
| 1 | 1 | 1 | 1 | 8  | 0 | 1 |
| 1 | 1 | 1 | 1 | 8  | 0 | 1 |
| 1 | 1 | 1 | 2 | 3  | 0 | 0 |
| 1 | 1 | 1 | 1 | 3  | 0 | 0 |
| 1 | 1 | 2 | 1 | 14 | 0 | 1 |
| 1 | 1 | 1 | 1 | 7  | 0 | 0 |
| 1 | 1 | 1 | 1 | 5  | 0 | 0 |
| 1 | 1 | 1 | 2 | 11 | 0 | 1 |
| 1 | 1 | 1 | 1 | 10 | 0 | 1 |

|   |   |   |   |    |   |   |
|---|---|---|---|----|---|---|
| 1 | 1 | 2 | 1 | 13 | 0 | 1 |
| 1 | 1 | 2 | 1 | 12 | 0 | 1 |
| 1 | 1 | 1 | 1 | 11 | 0 | 1 |
| 1 | 1 | 2 | 1 | 1  | 0 | 0 |
| 1 | 1 | 1 | 2 | 4  | 0 | 0 |
| 1 | 1 | 1 | 2 | 3  | 0 | 0 |
| 1 | 1 | 2 | 1 | 0  | 0 | 0 |
| 1 | 1 | 1 | 2 | 1  | 0 | 0 |
| 1 | 1 | 1 | 2 | 3  | 0 | 0 |
| 1 | 1 | 1 | 2 | 7  | 0 | 0 |
| 1 | 1 | 1 | 2 | 4  | 0 | 0 |
| 1 | 1 | 1 | 2 | 9  | 0 | 1 |
| 1 | 1 | 1 | 1 | 3  | 0 | 0 |
| 1 | 1 | 2 | 1 | 5  | 0 | 0 |
| 1 | 1 | 1 | 1 | 5  | 0 | 0 |
| 1 | 1 | 1 | 1 | 0  | 0 | 0 |
| 1 | 1 | 1 | 2 | 5  | 0 | 0 |
| 1 | 1 | 1 | 2 | 5  | 0 | 0 |
| 1 | 1 | 1 | 2 | 1  | 0 | 0 |
| 1 | 1 | 1 | 1 | 1  | 0 | 0 |
| 1 | 1 | 1 | 2 | 7  | 0 | 0 |
| 1 | 1 | 1 | 2 | 7  | 0 | 0 |
| 1 | 1 | 1 | 1 | 14 | 0 | 1 |
| 1 | 1 | 1 | 2 | 18 | 0 | 1 |
| 1 | 1 | 1 | 1 | 10 | 0 | 1 |
| 1 | 1 | 1 | 2 | 1  | 0 | 0 |
| 1 | 1 | 1 | 2 | 8  | 0 | 1 |
| 1 | 1 | 1 | 2 | 3  | 0 | 0 |
| 1 | 1 | 1 | 2 | 3  | 0 | 0 |
| 1 | 1 | 1 | 1 | 6  | 0 | 0 |
| 1 | 1 | 1 | 2 | 7  | 0 | 0 |
| 1 | 1 | 1 | 2 | 5  | 0 | 0 |
| 1 | 1 | 1 | 2 | 5  | 0 | 0 |
| 1 | 1 | 1 | 2 | 1  | 0 | 0 |
| 1 | 1 | 1 | 1 | 2  | 0 | 0 |
| 1 | 1 | 1 | 1 | 2  | 0 | 0 |
| 1 | 1 | 1 | 1 | 0  | 0 | 0 |
| 1 | 1 | 1 | 2 | 6  | 0 | 0 |
| 1 | 1 | 1 | 2 | 4  | 0 | 0 |
| 1 | 1 | 1 | 2 | 4  | 0 | 0 |
| 1 | 1 | 1 | 2 | 3  | 0 | 0 |
| 1 | 1 | 1 | 2 | 3  | 0 | 0 |
| 1 | 1 | 2 | 1 | 6  | 0 | 0 |
| 1 | 1 | 1 | 2 | 24 | 0 | 1 |
| 1 | 1 | 1 | 1 | 3  | 0 | 0 |
| 1 | 1 | 1 | 2 | 26 | 0 | 1 |
| 1 | 1 | 1 | 2 | 18 | 0 | 1 |
| 1 | 1 | 1 | 2 | 26 | 0 | 1 |
| 1 | 1 | 1 | 2 | 18 | 0 | 1 |
| 1 | 1 | 1 | 1 | 21 | 0 | 1 |
| 1 | 1 | 1 | 2 | 15 | 0 | 1 |
| 1 | 1 | 1 | 2 | 13 | 0 | 1 |

|   |   |   |   |    |   |   |
|---|---|---|---|----|---|---|
| 1 | 1 | 1 | 2 | 14 | 0 | 1 |
| 1 | 1 | 1 | 2 | 13 | 0 | 1 |
| 1 | 1 | 1 | 2 | 11 | 0 | 1 |
| 1 | 1 | 2 | 1 | 13 | 0 | 1 |
| 1 | 1 | 1 | 2 | 7  | 0 | 0 |
| 1 | 1 | 1 | 2 | 6  | 0 | 0 |
| 1 | 1 | 1 | 2 | 6  | 0 | 0 |
| 1 | 1 | 1 | 2 | 7  | 0 | 0 |
| 1 | 1 | 1 | 2 | 11 | 0 | 1 |
| 1 | 1 | 1 | 2 | 4  | 0 | 0 |
| 1 | 1 | 1 | 1 | 8  | 0 | 1 |
| 1 | 1 | 1 | 2 | 2  | 0 | 0 |
| 1 | 1 | 1 | 2 | 3  | 0 | 0 |
| 1 | 1 | 1 | 1 | 1  | 0 | 0 |
| 1 | 1 | 1 | 2 | 5  | 0 | 0 |
| 1 | 1 | 1 | 2 | 5  | 0 | 0 |
| 1 | 1 | 1 | 1 | 5  | 0 | 0 |
| 1 | 1 | 1 | 2 | 2  | 0 | 0 |
| 1 | 1 | 1 | 2 | 2  | 0 | 0 |
| 1 | 1 | 1 | 2 | 5  | 0 | 0 |
| 1 | 1 | 1 | 2 | 4  | 0 | 0 |
| 1 | 1 | 1 | 2 | 6  | 0 | 0 |
| 1 | 1 | 1 | 1 | 6  | 0 | 0 |
| 1 | 1 | 1 | 2 | 14 | 0 | 1 |
| 1 | 1 | 1 | 1 | 0  | 0 | 0 |
| 1 | 1 | 2 | 1 | 7  | 0 | 0 |
| 1 | 1 | 1 | 2 | 4  | 0 | 0 |
| 1 | 1 | 2 | 1 | 6  | 0 | 0 |
| 1 | 1 | 1 | 1 | 6  | 0 | 0 |
| 1 | 1 | 1 | 1 | 5  | 0 | 0 |
| 1 | 1 | 2 | 1 | 6  | 0 | 0 |
| 1 | 1 | 1 | 1 | 5  | 0 | 0 |
| 1 | 1 | 1 | 2 | 5  | 0 | 0 |
| 1 | 1 | 1 | 1 | 2  | 0 | 0 |
| 1 | 1 | 1 | 2 | 3  | 0 | 0 |
| 1 | 1 | 1 | 1 | 18 | 0 | 1 |
| 1 | 1 | 1 | 2 | 1  | 0 | 0 |
| 1 | 1 | 1 | 2 | 7  | 0 | 0 |
| 1 | 1 | 1 | 2 | 18 | 0 | 1 |
| 1 | 1 | 1 | 2 | 3  | 0 | 0 |
| 1 | 1 | 1 | 1 | 3  | 0 | 0 |
| 1 | 1 | 2 | 1 | 6  | 0 | 0 |
| 1 | 1 | 2 | 1 | 6  | 0 | 0 |
| 1 | 1 | 1 | 1 | 5  | 0 | 0 |
| 1 | 1 | 1 | 2 | 6  | 0 | 0 |
| 1 | 1 | 1 | 1 | 7  | 0 | 0 |
| 1 | 1 | 1 | 2 | 5  | 0 | 0 |
| 1 | 1 | 1 | 2 | 7  | 0 | 0 |
| 1 | 1 | 1 | 1 | 2  | 0 | 0 |
| 1 | 1 | 1 | 1 | 8  | 0 | 1 |
| 1 | 1 | 1 | 1 | 7  | 0 | 0 |
| 1 | 1 | 1 | 2 | 18 | 0 | 1 |
| 1 | 1 | 1 | 2 | 7  | 0 | 0 |
| 1 | 1 | 1 | 2 | 6  | 0 | 0 |

|   |   |   |   |    |   |   |
|---|---|---|---|----|---|---|
| 1 | 1 | 1 | 2 | 3  | 0 | 0 |
| 1 | 1 | 1 | 2 | 5  | 0 | 0 |
| 1 | 1 | 1 | 2 | 16 | 0 | 1 |
| 1 | 1 | 1 | 2 | 6  | 0 | 0 |
| 1 | 1 | 2 | 1 | 5  | 0 | 0 |
| 1 | 1 | 2 | 1 | 5  | 0 | 0 |
| 1 | 1 | 1 | 2 | 1  | 0 | 0 |
| 1 | 1 | 1 | 2 | 2  | 0 | 0 |
| 1 | 1 | 1 | 1 | 1  | 0 | 0 |
| 1 | 1 | 2 | 1 | 18 | 0 | 1 |
| 1 | 1 | 1 | 2 | 4  | 0 | 0 |
| 1 | 1 | 1 | 1 | 14 | 0 | 1 |
| 1 | 1 | 1 | 1 | 3  | 0 | 0 |
| 1 | 1 | 2 | 1 | 7  | 0 | 0 |
| 1 | 1 | 1 | 2 | 6  | 0 | 0 |
| 1 | 1 | 1 | 1 | 2  | 0 | 0 |
| 1 | 1 | 1 | 1 | 5  | 0 | 0 |
| 1 | 1 | 1 | 2 | 2  | 0 | 0 |
| 1 | 1 | 1 | 1 | 6  | 0 | 0 |
| 1 | 1 | 1 | 2 | 3  | 0 | 0 |
| 1 | 1 | 1 | 2 | 5  | 0 | 0 |
| 1 | 1 | 1 | 2 | 15 | 0 | 1 |
| 1 | 1 | 1 | 2 | 4  | 0 | 0 |
| 1 | 1 | 2 | 1 | 2  | 0 | 0 |
| 1 | 1 | 1 | 1 | 2  | 0 | 0 |
| 1 | 1 | 2 | 1 | 5  | 0 | 0 |
| 1 | 1 | 1 | 2 | 4  | 0 | 0 |
| 1 | 1 | 2 | 1 | 4  | 0 | 0 |
| 1 | 1 | 1 | 1 | 1  | 0 | 0 |
| 1 | 1 | 2 | 1 | 2  | 0 | 0 |
| 1 | 1 | 2 | 1 | 4  | 0 | 0 |
| 1 | 1 | 1 | 1 | 6  | 0 | 0 |
| 1 | 1 | 1 | 2 | 6  | 0 | 0 |
| 1 | 1 | 1 | 2 | 5  | 0 | 0 |
| 1 | 1 | 2 | 1 | 4  | 0 | 0 |
| 1 | 1 | 2 | 1 | 5  | 0 | 0 |
| 1 | 1 | 1 | 1 | 6  | 0 | 0 |
| 1 | 1 | 1 | 1 | 7  | 0 | 0 |
| 1 | 1 | 1 | 1 | 3  | 0 | 0 |
| 1 | 1 | 1 | 2 | 3  | 0 | 0 |
| 1 | 1 | 1 | 2 | 3  | 0 | 0 |
| 1 | 1 | 1 | 2 | 3  | 0 | 0 |
| 1 | 1 | 1 | 2 | 3  | 0 | 0 |
| 1 | 1 | 1 | 2 | 6  | 0 | 0 |
| 1 | 1 | 1 | 2 | 4  | 0 | 0 |
| 1 | 1 | 1 | 1 | 4  | 0 | 0 |
| 1 | 1 | 1 | 2 | 4  | 0 | 0 |
| 1 | 1 | 1 | 2 | 4  | 0 | 0 |
| 1 | 1 | 1 | 2 | 5  | 0 | 0 |

|   |   |   |   |    |   |   |
|---|---|---|---|----|---|---|
| 1 | 1 | 1 | 2 | 5  | 0 | 0 |
| 1 | 1 | 1 | 2 | 5  | 0 | 0 |
| 1 | 1 | 1 | 2 | 5  | 0 | 0 |
| 1 | 1 | 1 | 1 | 6  | 0 | 0 |
| 1 | 1 | 1 | 1 | 12 | 0 | 1 |
| 1 | 1 | 1 | 2 | 6  | 0 | 0 |
| 1 | 1 | 2 | 1 | 8  | 0 | 1 |
| 1 | 1 | 2 | 1 | 6  | 0 | 0 |
| 1 | 1 | 2 | 1 | 6  | 0 | 0 |
| 1 | 1 | 2 | 1 | 5  | 0 | 0 |
| 1 | 1 | 1 | 2 | 2  | 0 | 0 |
| 1 | 1 | 1 | 2 | 20 | 0 | 1 |
| 1 | 1 | 1 | 2 | 4  | 0 | 0 |
| 1 | 1 | 1 | 1 | 3  | 0 | 0 |
| 1 | 1 | 1 | 1 | 9  | 0 | 1 |
| 1 | 1 | 1 | 2 | 3  | 0 | 0 |
| 1 | 1 | 1 | 2 | 3  | 0 | 0 |
| 1 | 1 | 1 | 2 | 3  | 0 | 0 |
| 1 | 1 | 1 | 2 | 2  | 0 | 0 |
| 1 | 1 | 1 | 2 | 3  | 0 | 0 |
| 1 | 1 | 1 | 2 | 16 | 0 | 1 |
| 1 | 1 | 1 | 2 | 6  | 0 | 0 |
| 1 | 1 | 1 | 2 | 5  | 0 | 0 |
| 1 | 1 | 1 | 2 | 5  | 0 | 0 |
| 1 | 1 | 1 | 2 | 4  | 0 | 0 |
| 1 | 1 | 1 | 2 | 4  | 0 | 0 |
| 1 | 1 | 1 | 2 | 7  | 0 | 0 |
| 1 | 1 | 1 | 2 | 7  | 0 | 0 |
| 1 | 1 | 1 | 2 | 6  | 0 | 0 |
| 1 | 1 | 1 | 2 | 8  | 0 | 1 |
| 1 | 1 | 1 | 2 | 7  | 0 | 0 |
| 1 | 1 | 1 | 2 | 7  | 0 | 0 |
| 1 | 1 | 1 | 2 | 3  | 0 | 0 |
| 1 | 1 | 1 | 2 | 3  | 0 | 0 |
| 1 | 1 | 2 | 1 | 7  | 0 | 0 |
| 1 | 1 | 2 | 1 | 2  | 0 | 0 |
| 1 | 1 | 1 | 1 | 3  | 0 | 0 |
| 1 | 1 | 2 | 1 | 3  | 0 | 0 |
| 1 | 1 | 1 | 2 | 29 | 0 | 1 |
| 1 | 1 | 1 | 2 | 1  | 0 | 0 |
| 1 | 1 | 1 | 1 | 6  | 0 | 0 |
| 1 | 1 | 1 | 2 | 6  | 0 | 0 |
| 1 | 1 | 1 | 2 | 6  | 0 | 0 |
| 1 | 1 | 1 | 2 | 8  | 0 | 1 |
| 1 | 1 | 1 | 2 | 6  | 0 | 0 |
| 1 | 1 | 1 | 2 | 8  | 0 | 1 |
| 1 | 1 | 1 | 2 | 8  | 0 | 1 |
| 1 | 1 | 1 | 1 | 8  | 0 | 1 |
| 1 | 1 | 1 | 1 | 9  | 0 | 1 |
| 1 | 1 | 1 | 2 | 7  | 0 | 0 |
| 1 | 1 | 1 | 2 | 4  | 0 | 0 |
| 1 | 1 | 2 | 1 | 3  | 0 | 0 |
| 1 | 1 | 1 | 2 | 2  | 0 | 0 |
| 1 | 1 | 1 | 2 | 6  | 0 | 0 |

|   |   |   |   |    |   |   |
|---|---|---|---|----|---|---|
| 1 | 1 | 1 | 1 | 10 | 0 | 1 |
| 1 | 1 | 1 | 1 | 3  | 0 | 0 |
| 1 | 1 | 1 | 2 | 5  | 0 | 0 |
| 1 | 1 | 1 | 1 | 2  | 0 | 0 |
| 1 | 1 | 1 | 1 | 2  | 0 | 0 |
| 1 | 1 | 1 | 2 | 21 | 0 | 1 |
| 1 | 1 | 1 | 2 | 2  | 0 | 0 |
| 1 | 1 | 1 | 2 | 6  | 0 | 0 |
| 1 | 1 | 1 | 2 | 6  | 0 | 0 |
| 1 | 1 | 1 | 2 | 5  | 0 | 0 |
| 1 | 1 | 2 | 1 | 6  | 0 | 0 |
| 1 | 1 | 2 | 1 | 14 | 0 | 1 |
| 1 | 1 | 1 | 2 | 8  | 0 | 1 |
| 1 | 1 | 1 | 2 | 6  | 0 | 0 |
| 1 | 1 | 1 | 2 | 6  | 0 | 0 |
| 1 | 1 | 1 | 2 | 6  | 0 | 0 |
| 1 | 1 | 1 | 1 | 20 | 0 | 1 |
| 1 | 1 | 1 | 1 | 7  | 0 | 0 |
| 1 | 1 | 1 | 1 | 2  | 0 | 0 |
| 1 | 1 | 1 | 2 | 15 | 0 | 1 |
| 1 | 1 | 1 | 2 | 5  | 0 | 0 |
| 1 | 1 | 1 | 2 | 6  | 0 | 0 |
| 1 | 1 | 1 | 2 | 6  | 0 | 0 |
| 1 | 1 | 1 | 2 | 5  | 0 | 0 |
| 1 | 1 | 1 | 2 | 3  | 0 | 0 |
| 1 | 1 | 1 | 1 | 2  | 0 | 0 |
| 1 | 1 | 1 | 1 | 0  | 0 | 0 |
| 1 | 1 | 1 | 2 | 5  | 0 | 0 |
| 1 | 1 | 1 | 2 | 2  | 0 | 0 |
| 1 | 1 | 1 | 1 | 6  | 0 | 0 |
| 1 | 1 | 1 | 2 | 2  | 0 | 0 |
| 1 | 1 | 1 | 2 | 6  | 0 | 0 |
| 1 | 1 | 1 | 1 | 5  | 0 | 0 |
| 1 | 1 | 1 | 2 | 2  | 0 | 0 |
| 1 | 1 | 1 | 1 | 0  | 0 | 0 |
| 1 | 1 | 1 | 2 | 8  | 0 | 1 |
| 1 | 1 | 2 | 1 | 8  | 0 | 1 |
| 1 | 1 | 1 | 2 | 10 | 0 | 1 |
| 1 | 1 | 1 | 2 | 13 | 0 | 1 |
| 1 | 1 | 2 | 1 | 3  | 0 | 0 |
| 1 | 1 | 1 | 2 | 6  | 0 | 0 |
| 1 | 1 | 1 | 2 | 2  | 0 | 0 |
| 1 | 1 | 1 | 2 | 2  | 0 | 0 |
| 1 | 1 | 1 | 2 | 4  | 0 | 0 |
| 1 | 1 | 1 | 2 | 2  | 0 | 0 |
| 1 | 1 | 1 | 2 | 9  | 0 | 1 |
| 1 | 1 | 1 | 1 | 8  | 0 | 1 |
| 1 | 1 | 1 | 1 | 9  | 0 | 1 |
| 1 | 1 | 1 | 2 | 8  | 0 | 1 |
| 1 | 1 | 1 | 2 | 5  | 0 | 0 |
| 1 | 1 | 1 | 2 | 1  | 0 | 0 |
| 1 | 1 | 1 | 2 | 14 | 0 | 1 |
| 1 | 1 | 2 | 1 | 9  | 0 | 1 |
| 1 | 1 | 1 | 2 | 4  | 0 | 0 |



|   |   |   |   |     |   |   |
|---|---|---|---|-----|---|---|
| 1 | 1 | 1 | 2 | 3   | 0 | 0 |
| 1 | 1 | 1 | 2 | 3   | 0 | 0 |
| 1 | 1 | 1 | 2 | 3   | 0 | 0 |
| 1 | 1 | 1 | 2 | 8   | 0 | 1 |
| 1 | 1 | 1 | 2 | 5   | 0 | 0 |
| 1 | 1 | 1 | 1 | 8   | 0 | 1 |
| 1 | 1 | 1 | 2 | 8   | 0 | 1 |
| 1 | 1 | 1 | 2 | 5   | 0 | 0 |
| 1 | 1 | 2 | 1 | 6   | 0 | 0 |
| 1 | 1 | 1 | 2 | 2   | 0 | 0 |
| 1 | 1 | 1 | 2 | 2   | 0 | 0 |
| 1 | 1 | 1 | 1 | 6   | 0 | 0 |
| 1 | 1 | 2 | 1 | 7   | 0 | 0 |
| 1 | 1 | 1 | 2 | 6   | 0 | 0 |
| 1 | 1 | 1 | 2 | 12  | 0 | 1 |
| 1 | 1 | 1 | 1 | 8   | 0 | 1 |
| 1 | 1 | 1 | 1 | 2   | 0 | 0 |
| 1 | 1 | 1 | 2 | 7   | 0 | 0 |
| 1 | 1 | 1 | 2 | 6   | 0 | 0 |
| 1 | 1 | 1 | 1 | 5   | 0 | 0 |
| 1 | 1 | 1 | 2 | 4   | 0 | 0 |
| 1 | 1 | 1 | 2 | 2   | 0 | 0 |
| 1 | 1 | 1 | 1 | 0   | 0 | 0 |
| 1 | 1 | 1 | 2 | 1   | 0 | 0 |
| 1 | 1 | 1 | 2 | 1   | 0 | 0 |
| 1 | 1 | 1 | 1 | 275 | 1 |   |
| 1 | 1 | 1 | 1 | 112 | 0 | 1 |
| 1 | 1 | 1 | 1 | 190 | 1 |   |
| 1 | 1 | 1 | 2 | 396 | 1 |   |
| 1 | 1 | 1 | 2 | 212 | 1 |   |
| 1 | 1 | 2 | 2 | 266 | 1 |   |
| 1 | 1 | 1 | 2 | 162 | 0 | 1 |
| 1 | 1 | 1 | 2 | 232 | 1 |   |
| 1 | 1 | 2 | 1 | 30  | 0 | 1 |
| 1 | 1 | 1 | 1 | 8   | 0 | 1 |
| 1 | 1 | 1 | 1 | 103 | 0 | 1 |
| 1 | 1 | 1 | 2 | 360 | 1 |   |
| 1 | 1 | 1 | 1 | 264 | 1 |   |
| 1 | 1 | 1 | 2 | 530 | 1 |   |
| 1 | 1 | 1 | 2 | 514 | 1 |   |
| 1 | 1 | 1 | 1 | 264 | 1 |   |
| 1 | 1 | 1 | 2 | 306 | 1 |   |
| 1 | 1 | 1 | 2 | 217 | 1 |   |
| 1 | 1 | 1 | 2 | 360 | 1 |   |
| 1 | 1 | 1 | 2 | 330 | 1 |   |
| 1 | 1 | 1 | 1 | 431 | 1 |   |
| 1 | 1 | 1 | 2 | 398 | 1 |   |
| 1 | 1 | 1 | 2 | 23  | 0 | 1 |
| 1 | 1 | 1 | 1 | 426 | 1 |   |
| 1 | 1 | 1 | 2 | 112 | 0 | 1 |
| 1 | 1 | 1 | 2 | 209 | 1 |   |
| 1 | 1 | 1 | 2 | 434 | 1 |   |
| 1 | 1 | 1 | 2 | 2   | 0 | 0 |
| 3 | 1 | 1 | 2 | 3   | 0 | 0 |

|   |   |   |   |    |   |   |
|---|---|---|---|----|---|---|
| 1 | 1 | 1 | 2 | 1  | 0 | 0 |
| 3 | 1 | 1 | 1 | 2  | 0 | 0 |
| 3 | 1 | 2 | 2 | 0  | 0 | 0 |
| 3 | 1 | 1 | 2 | 1  | 0 | 0 |
| 3 | 1 | 1 | 1 | 5  | 0 | 0 |
| 3 | 1 | 1 | 2 | 18 | 0 | 1 |
| 3 | 1 | 2 | 2 | 1  | 0 | 0 |
| 3 | 1 | 1 | 2 | 0  | 0 | 0 |
| 3 | 1 | 1 | 2 | 21 | 0 | 1 |
| 2 | 1 | 2 | 2 | 0  | 0 | 0 |
| 3 | 1 | 2 | 2 | 0  | 0 | 0 |
| 1 | 1 | 1 | 1 | 1  | 0 | 0 |
| 3 | 1 | 2 | 2 | 9  | 0 | 1 |
| 3 | 1 | 1 | 2 | 3  | 0 | 0 |
| 3 | 1 | 2 | 2 | 0  | 0 | 0 |
| 3 | 1 | 1 | 1 | 2  | 0 | 0 |
| 2 | 2 | 1 | 3 | 0  | 0 | 0 |
| 1 | 2 |   |   |    | 1 |   |
| 1 | 1 | 1 | 2 | 7  | 0 | 0 |
| 1 | 1 | 1 | 2 | 2  | 0 | 0 |
| 3 | 1 | 1 | 1 | 13 | 0 | 1 |
| 3 | 1 | 1 | 1 | 1  | 0 | 0 |
| 1 | 1 | 1 | 2 | 1  | 0 | 0 |
| 1 | 1 | 1 | 2 | 53 | 0 | 1 |
| 3 | 1 | 1 | 2 | 2  | 0 | 0 |
| 3 | 1 | 1 | 1 | 1  | 0 | 0 |
| 3 | 1 | 1 | 1 | 0  | 0 | 0 |
| 3 | 1 | 1 | 1 | 3  | 0 | 0 |
| 3 | 1 | 2 | 2 | 3  | 0 | 0 |
| 3 | 1 | 1 | 2 | 1  | 0 | 0 |
| 1 | 2 |   |   |    | 1 |   |
| 3 | 1 | 1 | 2 | 1  | 0 | 0 |
| 3 | 1 | 1 | 2 | 2  | 0 | 0 |
| 3 | 1 | 1 | 2 | 8  | 0 | 1 |
| 1 | 1 | 1 | 2 | 0  | 0 | 0 |
| 3 | 1 | 1 | 2 | 6  | 0 | 0 |
| 3 | 2 | 1 | 3 | 2  | 0 | 0 |
| 3 | 1 | 1 | 2 | 1  | 0 | 0 |
| 1 | 2 | 1 | 3 | 0  | 0 | 0 |
| 3 | 1 | 1 | 2 | 0  | 0 | 0 |
| 3 | 1 | 1 | 1 | 0  | 0 | 0 |
| 3 | 1 | 1 | 1 | 0  | 0 | 0 |
| 3 | 2 | 1 | 3 | 0  | 0 | 0 |
| 3 | 1 | 1 | 2 | 40 | 0 | 1 |
| 1 | 1 | 1 | 2 | 1  | 0 | 0 |
| 3 | 1 | 1 | 1 | 2  | 0 | 0 |
| 3 | 1 | 2 | 1 | 43 | 0 | 1 |
| 1 | 2 | 1 | 3 | 13 | 0 | 1 |
| 3 | 1 | 1 | 1 | 2  | 0 | 0 |
| 3 | 1 | 1 | 2 | 0  | 0 | 0 |
| 1 | 1 | 1 | 2 | 1  | 0 | 0 |
| 3 | 1 | 2 | 2 | 0  | 0 | 0 |
| 3 | 1 | 1 | 2 | 16 | 0 | 1 |
| 1 | 1 | 1 | 1 | 2  | 0 | 0 |

|   |   |   |   |     |   |   |
|---|---|---|---|-----|---|---|
| 3 | 1 | 2 | 2 | 1   | 0 | 0 |
| 2 | 1 | 1 | 2 | 7   | 0 | 0 |
| 3 | 1 | 1 | 2 | 138 | 0 | 1 |
| 2 | 1 | 2 | 2 | 0   | 0 | 0 |
| 3 | 1 | 1 | 1 | 0   | 0 | 0 |
| 3 | 1 | 2 | 2 | 0   | 0 | 0 |
| 2 | 1 | 1 | 2 | 4   | 0 | 0 |
| 3 | 1 | 1 | 2 | 4   | 0 | 0 |
| 1 | 1 | 1 | 1 | 2   | 0 | 0 |
| 3 | 1 | 1 | 1 | 3   | 0 | 0 |
| 3 | 1 | 2 | 1 | 151 | 0 | 1 |
| 1 | 1 | 1 | 1 | 0   | 0 | 0 |
| 3 | 1 | 1 | 1 | 1   | 0 | 0 |
| 1 | 1 | 2 | 2 | 2   | 0 | 0 |
| 1 | 1 | 1 | 2 | 5   | 0 | 0 |
| 3 | 1 | 1 | 2 | 5   | 0 | 0 |
| 1 | 2 | 1 | 3 | 34  | 0 | 1 |
| 1 | 1 | 1 | 2 | 0   | 0 | 0 |
| 3 | 1 | 1 | 2 | 9   | 0 | 1 |
| 3 | 1 | 1 | 1 | 105 | 0 | 1 |
| 3 | 1 | 1 | 2 | 7   | 0 | 0 |
| 1 | 2 | 1 | 3 | 2   | 0 | 0 |
| 3 | 1 | 2 | 2 | 314 | 1 |   |
| 1 | 1 | 1 | 1 | 11  | 0 | 1 |
| 3 | 1 | 1 | 2 | 2   | 0 | 0 |
| 1 | 1 | 2 | 1 | 0   | 0 | 0 |
| 3 | 2 | 1 | 3 | 9   | 0 | 1 |
| 3 | 1 | 2 | 1 | 6   | 0 | 0 |
| 1 | 1 | 1 | 2 | 250 | 1 |   |
| 3 | 1 | 1 | 2 | 1   | 0 | 0 |
| 3 | 1 | 1 | 1 | 0   | 0 | 0 |
| 1 | 1 | 1 | 2 | 10  | 0 | 1 |
| 1 | 1 | 1 | 1 | 0   | 0 | 0 |
| 3 | 1 | 2 | 1 | 5   | 0 | 0 |
| 1 | 1 | 1 | 1 | 5   | 0 | 0 |
| 3 | 1 | 2 | 2 | 0   | 0 | 0 |
| 3 | 1 | 1 | 2 | 2   | 0 | 0 |
| 1 | 1 | 1 | 2 | 39  | 0 | 1 |
| 3 | 1 | 2 | 2 | 1   | 0 | 0 |
| 1 | 1 | 1 | 1 | 3   | 0 | 0 |
| 3 | 1 | 1 | 2 | 4   | 0 | 0 |
| 1 | 1 | 1 | 2 | 3   | 0 | 0 |
| 1 | 2 |   |   |     | 1 |   |
| 3 | 1 | 1 | 2 | 13  | 0 | 1 |
| 3 | 1 | 2 | 2 | 29  | 0 | 1 |
| 3 | 1 | 2 | 2 | 1   | 0 | 0 |
| 3 | 1 | 1 | 2 | 7   | 0 | 0 |
| 3 | 1 | 1 | 2 | 0   | 0 | 0 |
| 3 | 1 | 2 | 2 | 0   | 0 | 0 |
| 3 | 1 | 1 | 1 | 2   | 0 | 0 |
| 3 | 1 | 1 | 1 | 1   | 0 | 0 |
| 3 | 1 | 2 | 2 | 0   | 0 | 0 |
| 3 | 1 | 2 | 2 | 1   | 0 | 0 |
| 1 | 1 | 1 | 2 | 1   | 0 | 0 |

|   |   |   |   |     |   |   |
|---|---|---|---|-----|---|---|
| 3 | 1 | 1 | 2 | 1   | 0 | 0 |
| 3 | 1 | 1 | 1 | 0   | 0 | 0 |
| 1 | 1 | 2 | 2 | 6   | 0 | 0 |
| 3 | 1 | 1 | 2 | 5   | 0 | 0 |
| 3 | 2 | 1 | 3 | 0   | 0 | 0 |
| 3 | 1 | 2 | 2 | 308 | 1 |   |
| 3 | 1 | 1 | 1 | 37  | 0 | 1 |
| 3 | 1 | 1 | 2 | 2   | 0 | 0 |
| 3 | 1 | 1 | 1 | 0   | 0 | 0 |
| 1 | 1 | 1 | 1 | 2   | 0 | 0 |
| 1 | 1 | 1 | 2 | 24  | 0 | 1 |
| 3 | 2 | 1 | 3 | 0   | 0 | 0 |
| 3 | 1 | 1 | 2 | 7   | 0 | 0 |
| 3 | 1 | 2 | 2 | 2   | 0 | 0 |
| 1 | 1 | 1 | 2 | 2   | 0 | 0 |
| 3 | 1 | 1 | 2 | 7   | 0 | 0 |
| 2 | 2 | 1 | 3 | 0   | 0 | 0 |
| 1 | 1 | 1 | 1 | 0   | 0 | 0 |
| 3 | 1 | 1 | 2 | 2   | 0 | 0 |
| 1 | 1 | 1 | 2 | 1   | 0 | 0 |
| 3 | 1 | 1 | 1 | 1   | 0 | 0 |
| 3 | 1 | 1 | 1 | 0   | 0 | 0 |
| 3 | 1 | 1 | 1 | 1   | 0 | 0 |
| 3 | 1 | 1 | 1 | 1   | 0 | 0 |
| 1 | 1 | 1 | 2 | 1   | 0 | 0 |
| 3 | 1 | 1 | 1 | 1   | 0 | 0 |
| 1 | 1 | 1 | 1 | 0   | 0 | 0 |
| 1 | 1 | 1 | 1 | 0   | 0 | 0 |
| 3 | 1 | 1 | 2 | 7   | 0 | 0 |
| 1 | 1 | 1 | 1 | 0   | 0 | 0 |
| 3 | 1 | 1 | 2 | 5   | 0 | 0 |
| 3 | 1 | 1 | 1 | 6   | 0 | 0 |
| 1 | 1 | 1 | 2 | 1   | 0 | 0 |
| 3 | 1 | 1 | 1 | 0   | 0 | 0 |
| 3 | 1 | 1 | 2 | 3   | 0 | 0 |
| 1 | 2 |   |   |     | 1 |   |
| 3 | 1 | 1 | 2 | 5   | 0 | 0 |
| 3 | 1 | 1 | 2 | 0   | 0 | 0 |
| 3 | 1 | 1 | 2 | 1   | 0 | 0 |
| 1 | 1 | 2 | 2 | 7   | 0 | 0 |
| 3 | 1 | 1 | 1 | 1   | 0 | 0 |
| 3 | 1 | 1 | 2 | 1   | 0 | 0 |
| 3 | 1 | 2 | 2 | 35  | 0 | 1 |
| 2 | 1 | 1 | 2 | 0   | 0 | 0 |
| 3 | 1 | 1 | 1 | 9   | 0 | 1 |
| 3 | 1 | 1 | 2 | 1   | 0 | 0 |
| 3 | 1 | 1 | 1 | 1   | 0 | 0 |
| 1 | 1 | 2 | 2 | 286 | 1 |   |
| 3 | 1 | 1 | 2 | 0   | 0 | 0 |
| 1 | 1 | 1 | 2 | 5   | 0 | 0 |
| 3 | 1 | 1 | 2 | 7   | 0 | 0 |
| 3 | 1 | 1 | 2 | 12  | 0 | 1 |
| 3 | 1 | 1 | 1 | 0   | 0 | 0 |
| 1 | 1 | 1 | 1 | 3   | 0 | 0 |

|   |   |   |   |     |   |   |
|---|---|---|---|-----|---|---|
| 3 | 1 | 2 | 2 | 35  | 0 | 1 |
| 3 | 1 | 1 | 2 | 1   | 0 | 0 |
| 1 | 1 | 1 | 2 | 0   | 0 | 0 |
| 3 | 1 | 1 | 2 | 1   | 0 | 0 |
| 3 | 1 | 1 | 2 | 4   | 0 | 0 |
| 3 | 1 | 2 | 2 | 95  | 0 | 1 |
| 1 | 1 | 1 | 1 | 0   | 0 | 0 |
| 1 | 1 | 1 | 1 | 1   | 0 | 0 |
| 1 | 1 | 1 | 1 | 0   | 0 | 0 |
| 3 | 1 | 2 | 2 | 0   | 0 | 0 |
| 1 | 1 | 1 | 1 | 0   | 0 | 0 |
| 3 | 2 | 1 | 3 | 7   | 0 | 0 |
| 1 | 1 | 1 | 2 | 1   | 0 | 0 |
| 3 | 1 | 1 | 1 | 6   | 0 | 0 |
| 3 | 1 | 2 | 2 | 36  | 0 | 1 |
| 3 | 1 | 1 | 2 | 5   | 0 | 0 |
| 1 | 2 |   |   |     | 1 |   |
| 3 | 1 | 1 | 1 | 1   | 0 | 0 |
| 3 | 1 | 1 | 1 | 3   | 0 | 0 |
| 3 | 1 | 2 | 2 | 10  | 0 | 1 |
| 3 | 1 | 1 | 2 | 4   | 0 | 0 |
| 3 | 1 | 2 | 2 | 3   | 0 | 0 |
| 3 | 1 | 1 | 1 | 1   | 0 | 0 |
| 1 | 1 | 1 | 2 | 202 | 1 |   |
| 1 | 1 | 1 | 1 | 0   | 0 | 0 |
| 3 | 1 | 1 | 2 | 1   | 0 | 0 |
| 1 | 2 |   |   |     | 1 |   |
| 3 | 1 | 2 | 2 | 59  | 0 | 1 |
| 3 | 1 | 2 | 2 | 0   | 0 | 0 |
| 1 | 1 | 1 | 2 | 2   | 0 | 0 |
| 3 | 1 | 1 | 1 | 2   | 0 | 0 |
| 3 | 1 | 1 | 2 | 1   | 0 | 0 |
| 1 | 2 |   |   |     | 1 |   |
| 1 | 1 | 1 | 1 | 0   | 0 | 0 |
| 1 | 1 | 1 | 1 | 0   | 0 | 0 |
| 1 | 1 | 1 | 1 | 0   | 0 | 0 |
| 1 | 1 | 1 | 2 | 1   | 0 | 0 |
| 3 | 1 | 1 | 1 | 1   | 0 | 0 |
| 1 | 1 |   |   |     | 1 |   |
| 3 | 1 | 1 | 1 | 1   | 0 | 0 |
| 1 | 1 | 1 | 1 | 3   | 0 | 0 |
| 3 | 1 | 1 | 1 | 2   | 0 | 0 |
| 3 | 1 | 1 | 2 | 2   | 0 | 0 |
| 3 | 1 | 1 | 1 | 1   | 0 | 0 |
| 3 | 1 | 1 | 2 | 34  | 0 | 1 |
| 3 | 1 | 2 | 2 | 2   | 0 | 0 |
| 2 | 1 | 1 | 2 | 0   | 0 | 0 |
| 3 | 1 | 2 | 2 | 3   | 0 | 0 |
| 1 | 1 | 2 | 2 | 233 | 1 |   |
| 3 | 1 | 1 | 2 | 1   | 0 | 0 |
| 1 | 1 | 1 | 2 | 103 | 0 | 1 |
| 3 | 1 | 2 | 2 | 1   | 0 | 0 |
| 3 | 1 | 1 | 2 | 1   | 0 | 0 |
| 3 | 1 | 1 | 2 | 0   | 0 | 0 |

|   |   |   |   |     |   |   |
|---|---|---|---|-----|---|---|
| 1 | 2 |   |   |     | 1 |   |
| 3 | 2 | 1 | 3 | 0   | 0 | 0 |
| 3 | 1 | 1 | 2 | 0   | 0 | 0 |
| 1 | 1 | 1 | 2 | 2   | 0 | 0 |
| 3 | 1 | 2 | 2 | 328 | 1 |   |
| 3 | 1 | 1 | 2 | 0   | 0 | 0 |
| 3 | 1 | 1 | 1 | 0   | 0 | 0 |
| 3 | 2 | 1 | 3 | 0   | 0 | 0 |
| 3 | 1 | 2 | 1 | 101 | 0 | 1 |
| 3 | 2 | 1 | 3 | 0   | 0 | 0 |
| 3 | 1 | 2 | 2 | 275 | 1 |   |
| 3 | 1 | 1 | 1 | 5   | 0 | 0 |
| 3 | 1 | 2 | 2 | 7   | 0 | 0 |
| 1 | 1 | 1 | 2 | 0   | 0 | 0 |
| 3 | 1 | 2 | 1 | 0   | 0 | 0 |
| 1 | 1 | 1 | 2 | 3   | 0 | 0 |
| 1 | 1 | 1 | 2 | 2   | 0 | 0 |
| 3 | 1 | 1 | 1 | 1   | 0 | 0 |
| 3 | 1 | 1 | 2 | 147 | 0 | 1 |
| 3 | 1 | 1 | 1 | 4   | 0 | 0 |
| 3 | 1 | 1 | 2 | 9   | 0 | 1 |
| 3 | 1 | 1 | 1 | 2   | 0 | 0 |
| 3 | 1 | 1 | 1 | 11  | 0 | 1 |
| 3 | 1 | 1 | 1 | 6   | 0 | 0 |
| 3 | 1 | 1 | 1 | 3   | 0 | 0 |
| 3 | 1 | 1 | 2 | 43  | 0 | 1 |
| 2 | 1 | 1 | 2 | 0   | 0 | 0 |
| 3 | 1 | 1 | 1 | 8   | 0 | 1 |
| 1 | 2 | 1 | 3 | 7   | 0 | 0 |
| 3 | 1 | 2 | 1 | 2   | 0 | 0 |
| 3 | 1 | 1 | 2 | 1   | 0 | 0 |
| 1 | 1 | 1 | 2 | 1   | 0 | 0 |
| 3 | 1 | 2 | 2 | 212 | 1 |   |
| 3 | 1 | 1 | 2 | 3   | 0 | 0 |
| 3 | 1 | 2 | 1 | 65  | 0 | 1 |
| 1 | 2 | 1 | 3 | 0   | 0 | 0 |
| 1 | 1 | 2 | 1 | 45  | 0 | 1 |
| 1 | 1 | 2 | 2 | 129 | 0 | 1 |
| 3 | 1 | 2 | 2 | 291 | 1 |   |
| 3 | 1 | 1 | 2 | 1   | 0 | 0 |
| 3 | 1 | 1 | 1 | 0   | 0 | 0 |
| 3 | 1 | 1 | 2 | 40  | 0 | 1 |
| 3 | 1 | 1 | 2 | 0   | 0 | 0 |
| 1 | 1 | 1 | 2 | 25  | 0 | 1 |
| 3 | 1 | 1 | 2 | 2   | 0 | 0 |
| 3 | 1 | 1 | 1 | 7   | 0 | 0 |
| 1 | 2 | 1 | 3 | 2   | 0 | 0 |
| 1 | 1 | 1 | 1 | 1   | 0 | 0 |
| 3 | 1 | 2 | 2 | 59  | 0 | 1 |
| 3 | 1 | 1 | 1 | 3   | 0 | 0 |
| 3 | 1 | 1 | 2 | 0   | 0 | 0 |
| 2 | 1 | 1 | 2 | 0   | 0 | 0 |
| 3 | 1 | 1 | 1 | 3   | 0 | 0 |
| 3 | 1 | 2 | 1 | 199 | 1 |   |

|   |   |   |   |     |   |   |
|---|---|---|---|-----|---|---|
| 3 | 1 | 2 | 2 | 29  | 0 | 1 |
| 3 | 1 | 2 | 1 | 2   | 0 | 0 |
| 3 | 1 | 1 | 1 | 3   | 0 | 0 |
| 3 | 1 | 2 | 2 | 1   | 0 | 0 |
| 3 | 1 | 2 | 2 | 306 | 1 |   |
| 3 | 1 | 1 | 1 | 2   | 0 | 0 |
| 3 | 1 | 1 | 2 | 10  | 0 | 1 |
| 3 | 1 | 1 | 2 | 2   | 0 | 0 |
| 1 | 1 | 1 | 2 | 2   | 0 | 0 |
| 3 | 1 | 1 | 2 | 1   | 0 | 0 |
| 1 | 1 | 2 | 2 | 8   | 0 | 1 |
| 3 | 1 | 1 | 1 | 0   | 0 | 0 |
| 1 | 1 | 1 | 1 | 1   | 0 | 0 |
| 3 | 1 | 1 | 2 | 4   | 0 | 0 |
| 3 | 1 | 2 | 1 | 308 | 1 |   |
| 3 | 1 | 2 | 2 | 16  | 0 | 1 |
| 1 | 1 | 1 | 1 | 3   | 0 | 0 |
| 3 | 1 | 1 | 1 | 4   | 0 | 0 |
| 1 | 1 | 1 | 1 | 1   | 0 | 0 |
| 3 | 1 | 2 | 2 | 12  | 0 | 1 |
| 3 | 1 | 2 | 2 | 5   | 0 | 0 |
| 3 | 1 | 1 | 2 | 2   | 0 | 0 |
| 3 | 1 | 2 | 2 | 251 | 1 |   |
| 3 | 1 | 1 | 1 | 1   | 0 | 0 |
| 3 | 1 | 1 | 1 | 4   | 0 | 0 |
| 3 | 1 | 2 | 2 | 0   | 0 | 0 |
| 1 | 1 | 1 | 2 | 2   | 0 | 0 |
| 1 | 1 | 2 | 1 | 128 | 0 | 1 |
| 3 | 1 | 1 | 1 | 1   | 0 | 0 |
| 3 | 1 | 2 | 1 | 1   | 0 | 0 |
| 1 | 1 | 2 | 1 | 0   | 0 | 0 |
| 1 | 1 | 1 | 2 | 3   | 0 | 0 |
| 1 | 1 | 1 | 2 | 1   | 0 | 0 |
| 3 | 1 | 1 | 1 | 5   | 0 | 0 |
| 3 | 1 | 1 | 1 | 0   | 0 | 0 |
| 1 | 1 | 1 | 1 | 90  | 0 | 1 |
| 1 | 1 | 1 | 2 | 2   | 0 | 0 |
| 3 | 1 | 1 | 1 | 0   | 0 | 0 |
| 3 | 1 | 2 | 2 | 314 | 1 |   |
| 1 | 1 | 1 | 2 | 1   | 0 | 0 |
| 3 | 1 | 1 | 2 | 5   | 0 | 0 |
| 3 | 1 | 2 | 1 | 109 | 0 | 1 |
| 3 | 1 | 1 | 1 | 0   | 0 | 0 |
| 3 | 1 | 1 | 2 | 1   | 0 | 0 |
| 3 | 2 | 1 | 3 | 5   | 0 | 0 |
| 1 | 1 | 1 | 2 | 1   | 0 | 0 |
| 3 | 1 | 1 | 2 | 10  | 0 | 1 |
| 1 | 2 | 1 | 3 | 7   | 0 | 0 |
| 2 | 1 | 1 | 2 | 0   | 0 | 0 |
| 1 | 1 | 1 | 2 | 85  | 0 | 1 |
| 3 | 1 | 2 | 2 | 128 | 0 | 1 |
| 3 | 2 | 1 | 3 | 0   | 0 | 0 |
| 3 | 1 | 1 | 1 | 1   | 0 | 0 |
| 3 | 1 | 1 | 1 | 12  | 0 | 1 |

|   |   |   |   |     |   |   |
|---|---|---|---|-----|---|---|
| 1 | 2 |   |   |     | 1 |   |
| 1 | 2 | 1 | 3 | 2   | 0 | 0 |
| 3 | 1 | 1 | 1 | 11  | 0 | 1 |
| 3 | 1 | 1 | 1 | 5   | 0 | 0 |
| 3 | 1 | 1 | 2 | 3   | 0 | 0 |
| 3 | 1 | 2 | 1 | 0   | 0 | 0 |
| 3 | 1 | 1 | 2 | 4   | 0 | 0 |
| 1 | 1 | 1 | 2 | 2   | 0 | 0 |
| 3 | 1 | 1 | 2 | 13  | 0 | 1 |
| 3 | 1 | 2 | 2 | 244 | 1 |   |
| 3 | 1 | 2 | 1 | 141 | 0 | 1 |
| 3 | 1 | 1 | 1 | 0   | 0 | 0 |
| 3 | 2 | 1 | 3 | 8   | 0 | 1 |
| 1 | 2 | 1 | 3 | 0   | 0 | 0 |
| 1 | 1 | 1 | 2 | 2   | 0 | 0 |
| 1 | 1 | 1 | 1 | 1   | 0 | 0 |
| 3 | 1 | 1 | 2 | 4   | 0 | 0 |
| 2 | 2 | 1 | 3 | 10  | 0 | 1 |
| 3 | 1 | 1 | 2 | 1   | 0 | 0 |
| 3 | 2 | 1 | 3 | 0   | 0 | 0 |
| 1 | 1 | 1 | 2 | 3   | 0 | 0 |
| 3 | 1 | 1 | 1 | 0   | 0 | 0 |
| 3 | 1 | 1 | 1 | 0   | 0 | 0 |
| 1 | 1 | 1 | 1 | 1   | 0 | 0 |
| 3 | 1 | 1 | 1 | 4   | 0 | 0 |
| 3 | 1 | 1 | 2 | 0   | 0 | 0 |
| 1 | 1 | 1 | 1 | 1   | 0 | 0 |
| 1 | 2 | 1 | 3 | 4   | 0 | 0 |
| 2 | 1 | 1 | 2 | 0   | 0 | 0 |
| 3 | 1 | 1 | 1 | 6   | 0 | 0 |
| 3 | 1 | 1 | 2 | 2   | 0 | 0 |
| 3 | 1 | 1 | 1 | 12  | 0 | 1 |
| 1 | 1 | 1 | 2 | 7   | 0 | 0 |
| 3 | 1 | 1 | 1 | 0   | 0 | 0 |
| 1 | 1 | 1 | 2 | 2   | 0 | 0 |
| 3 | 1 | 2 | 1 | 2   | 0 | 0 |
| 3 | 1 | 1 | 2 | 49  | 0 | 1 |
| 3 | 1 | 1 | 2 | 4   | 0 | 0 |
| 1 | 1 | 1 | 2 | 13  | 0 | 1 |
| 3 | 1 | 2 | 2 | 103 | 0 | 1 |
| 1 | 1 | 1 | 1 | 2   | 0 | 0 |
| 3 | 1 | 2 | 2 | 2   | 0 | 0 |
| 3 | 1 | 1 | 1 | 4   | 0 | 0 |
| 2 | 1 | 1 | 2 | 0   | 0 | 0 |
| 3 | 1 | 1 | 1 | 0   | 0 | 0 |
| 3 | 1 | 1 | 2 | 9   | 0 | 1 |
| 3 | 1 | 1 | 2 | 4   | 0 | 0 |
| 1 | 1 | 1 | 2 | 0   | 0 | 0 |
| 1 | 1 | 1 | 1 | 0   | 0 | 0 |
| 3 | 1 | 2 | 2 | 180 | 0 | 1 |
| 1 | 1 | 1 | 2 | 3   | 0 | 0 |
| 3 | 1 | 1 | 1 | 0   | 0 | 0 |
| 3 | 1 | 1 | 2 | 0   | 0 | 0 |
| 3 | 1 | 1 | 2 | 3   | 0 | 0 |



|   |   |   |   |     |   |   |
|---|---|---|---|-----|---|---|
| 1 | 1 | 1 | 1 | 3   | 0 | 0 |
| 1 | 1 | 1 | 2 | 342 | 1 |   |
| 1 | 1 | 1 | 2 | 1   | 0 | 0 |
| 3 | 1 | 1 | 2 | 14  | 0 | 1 |
| 3 | 1 | 1 | 2 | 18  | 0 | 1 |
| 3 | 1 | 1 | 1 | 6   | 0 | 0 |
| 3 | 1 | 2 | 2 | 0   | 0 | 0 |
| 3 | 1 | 1 | 1 | 0   | 0 | 0 |
| 3 | 1 | 1 | 2 | 18  | 0 | 1 |
| 3 | 1 | 1 | 1 | 4   | 0 | 0 |
| 3 | 1 | 1 | 1 | 0   | 0 | 0 |
| 1 | 1 | 1 | 2 | 0   | 0 | 0 |
| 3 | 1 | 1 | 2 | 107 | 0 | 1 |
| 3 | 1 | 1 | 1 | 1   | 0 | 0 |
| 3 | 1 | 1 | 2 | 7   | 0 | 0 |
| 2 | 1 | 1 | 2 | 0   | 0 | 0 |
| 1 | 2 |   |   |     | 1 |   |
| 1 | 2 | 1 | 3 | 62  | 0 | 1 |
| 3 | 1 | 2 | 2 | 338 | 1 |   |
| 3 | 1 | 1 | 1 | 13  | 0 | 1 |
| 2 | 2 | 1 | 3 | 5   | 0 | 0 |
| 3 | 1 | 1 | 1 | 1   | 0 | 0 |
| 3 | 1 | 2 | 2 | 0   | 0 | 0 |
| 3 | 1 | 1 | 2 | 39  | 0 | 1 |
| 3 | 1 | 2 | 2 | 4   | 0 | 0 |
| 3 | 1 | 1 | 2 | 1   | 0 | 0 |
| 3 | 1 | 2 | 2 | 124 | 0 | 1 |
| 3 | 1 | 2 | 2 | 67  | 0 | 1 |
| 1 | 1 | 1 | 1 | 4   | 0 | 0 |
| 3 | 1 | 2 | 1 | 0   | 0 | 0 |
| 3 | 1 | 1 | 2 | 10  | 0 | 1 |
| 1 | 1 | 1 | 2 | 0   | 0 | 0 |
| 1 | 1 | 1 | 1 | 0   | 0 | 0 |
| 1 | 1 | 2 | 2 | 3   | 0 | 0 |
| 1 | 1 | 2 | 2 | 340 | 1 |   |
| 3 | 1 | 2 | 1 | 3   | 0 | 0 |
| 3 | 1 | 1 | 2 | 1   | 0 | 0 |
| 3 | 1 | 1 | 2 | 2   | 0 | 0 |
| 1 | 1 | 1 | 1 | 1   | 0 | 0 |
| 3 | 1 | 1 | 1 | 2   | 0 | 0 |
| 1 | 1 | 1 | 2 | 20  | 0 | 1 |
| 3 | 1 | 2 | 1 | 145 | 0 | 1 |
| 3 | 1 | 1 | 2 | 16  | 0 | 1 |
| 3 | 1 | 1 | 1 | 1   | 0 | 0 |
| 1 | 1 | 1 | 2 | 1   | 0 | 0 |
| 3 | 1 | 1 | 2 | 1   | 0 | 0 |
| 3 | 2 | 1 | 3 | 0   | 0 | 0 |
| 1 | 1 | 1 | 1 | 2   | 0 | 0 |
| 3 | 1 | 1 | 1 | 0   | 0 | 0 |
| 3 | 1 | 1 | 2 | 2   | 0 | 0 |
| 3 | 1 | 1 | 2 | 0   | 0 | 0 |
| 3 | 1 | 1 | 1 | 29  | 0 | 1 |
| 3 | 1 | 1 | 1 | 2   | 0 | 0 |
| 3 | 1 | 1 | 2 | 7   | 0 | 0 |

|   |   |   |   |     |   |   |
|---|---|---|---|-----|---|---|
| 3 | 1 | 2 | 1 | 3   | 0 | 0 |
| 1 | 2 | 1 | 3 | 0   | 0 | 0 |
| 3 | 1 | 1 | 1 | 0   | 0 | 0 |
| 3 | 1 | 1 | 2 | 0   | 0 | 0 |
| 1 | 2 | 1 | 3 | 5   | 0 | 0 |
| 1 | 2 |   |   |     | 1 |   |
| 3 | 1 | 1 | 2 | 49  | 0 | 1 |
| 3 | 1 | 2 | 2 | 8   | 0 | 1 |
| 3 | 1 | 1 | 1 | 0   | 0 | 0 |
| 2 | 1 | 2 | 2 | 0   | 0 | 0 |
| 3 | 1 | 1 | 2 | 19  | 0 | 1 |
| 1 | 1 | 2 | 1 | 0   | 0 | 0 |
| 3 | 1 | 1 | 2 | 2   | 0 | 0 |
| 3 | 1 | 1 | 1 | 2   | 0 | 0 |
| 1 | 1 | 2 | 2 | 378 | 1 |   |
| 1 | 1 | 1 | 1 | 410 | 1 |   |
| 1 | 1 | 2 | 2 | 383 | 1 |   |
| 1 | 1 | 1 | 1 | 317 | 1 |   |
| 1 | 1 | 2 | 2 | 246 | 1 |   |
| 1 | 1 | 2 | 1 | 308 | 1 |   |
| 1 | 1 | 1 | 2 | 361 | 1 |   |
| 1 | 1 | 1 | 1 | 5   | 0 | 0 |
| 1 | 1 | 1 | 1 | 73  | 0 | 1 |
| 1 | 1 | 1 | 1 | 244 | 1 |   |
| 1 | 1 | 1 | 2 | 426 | 1 |   |
| 1 | 2 |   |   |     | 1 |   |
| 1 | 2 |   |   |     | 1 |   |
| 1 | 2 |   |   |     | 1 |   |
| 3 | 2 |   |   |     | 1 |   |
| 1 | 2 |   |   |     | 1 |   |
| 1 | 2 |   |   |     | 1 |   |
| 1 | 2 |   |   |     | 1 |   |
| 3 | 2 |   |   |     | 1 |   |
| 1 | 2 |   |   |     | 1 |   |
| 1 | 2 |   |   |     | 1 |   |
| 1 | 2 |   |   |     | 1 |   |
| 1 | 1 |   |   |     | 1 |   |
| 1 | 1 | 1 | 2 | 10  | 0 | 1 |
| 1 | 2 |   |   |     | 1 |   |
| 1 | 2 |   |   |     | 1 |   |
| 3 | 2 |   |   |     | 1 |   |
| 3 | 1 | 1 | 1 | 8   | 0 | 1 |
| 1 | 2 |   |   |     | 1 |   |
| 3 | 2 |   |   |     | 1 |   |
| 1 | 2 |   |   |     | 1 |   |
| 1 | 2 |   |   |     | 1 |   |
| 1 | 2 |   |   |     | 1 |   |
| 1 | 2 |   |   |     | 1 |   |
| 3 | 2 |   |   |     | 1 |   |
| 1 | 2 |   |   |     | 1 |   |
| 1 | 2 |   |   |     | 1 |   |
| 1 | 2 |   |   |     | 1 |   |
| 3 | 2 |   |   |     | 1 |   |
| 3 | 2 |   |   |     | 1 |   |
| 3 | 2 |   |   |     | 1 |   |

|   |   |   |   |     |   |   |
|---|---|---|---|-----|---|---|
| 1 | 2 |   |   |     | 1 |   |
| 3 | 2 |   |   |     | 1 |   |
| 1 | 2 |   |   |     | 1 |   |
| 3 | 2 |   |   |     | 1 |   |
| 3 | 2 |   |   |     | 1 |   |
| 1 | 2 |   |   |     | 1 |   |
| 1 | 1 | 1 | 2 | 8   | 0 | 1 |
| 1 | 1 | 1 | 2 | 5   | 0 | 0 |
| 1 | 1 | 1 | 2 | 20  | 0 | 1 |
| 1 | 1 | 1 | 2 | 38  | 0 | 1 |
| 1 | 1 | 1 | 1 | 108 | 0 | 1 |
| 1 | 1 | 1 | 1 | 11  | 0 | 1 |
| 1 | 1 | 1 | 2 | 5   | 0 | 0 |
| 1 | 1 | 1 | 1 | 21  | 0 | 1 |
| 1 | 1 | 1 | 2 | 7   | 0 | 0 |
| 1 | 1 | 1 | 1 | 131 | 0 | 1 |
| 1 | 1 | 1 | 2 | 16  | 0 | 1 |
| 1 | 1 | 1 | 2 | 40  | 0 | 1 |
| 1 | 1 | 1 | 2 | 21  | 0 | 1 |
| 1 | 1 | 1 | 1 | 26  | 0 | 1 |
| 3 | 1 | 2 | 1 | 12  | 0 | 1 |
| 1 | 1 | 1 | 1 | 9   | 0 | 1 |
| 1 | 1 | 1 | 1 | 5   | 0 | 0 |
| 3 | 1 | 1 | 2 | 70  | 0 | 1 |
| 3 | 1 | 1 | 2 | 53  | 0 | 1 |
| 1 | 2 | 1 | 3 | 0   | 0 | 0 |
| 1 | 1 | 1 | 2 | 48  | 0 | 1 |
| 1 | 1 | 1 | 2 | 1   | 0 | 0 |
| 1 | 1 | 1 | 2 | 0   | 0 | 0 |
| 1 | 1 | 1 | 2 | 0   | 0 | 0 |
| 3 | 1 | 1 | 1 | 8   | 0 | 1 |
| 3 | 1 | 1 | 1 | 6   | 0 | 0 |
| 3 | 1 | 1 | 2 | 19  | 0 | 1 |
| 3 | 1 | 1 | 1 | 6   | 0 | 0 |
| 3 | 1 | 1 | 2 | 1   | 0 | 0 |
| 1 | 1 | 2 | 1 | 8   | 0 | 1 |
| 1 | 1 | 1 | 2 | 19  | 0 | 1 |
| 2 | 1 | 1 | 2 | 4   | 0 | 0 |
| 1 | 1 | 1 | 2 | 5   | 0 | 0 |
| 1 | 1 | 1 | 1 | 4   | 0 | 0 |
| 1 | 1 | 1 | 2 | 4   | 0 | 0 |
| 1 | 1 | 1 | 2 | 0   | 0 | 0 |
| 3 | 2 | 1 | 3 | 29  | 0 | 1 |
| 1 | 1 | 2 | 2 | 18  | 0 | 1 |
| 1 | 1 | 1 | 2 | 1   | 0 | 0 |
| 3 | 1 | 1 | 1 | 16  | 0 | 1 |
| 1 | 2 | 1 | 3 | 0   | 0 | 0 |
| 1 | 1 | 1 | 2 | 12  | 0 | 1 |
| 1 | 1 | 2 | 1 | 51  | 0 | 1 |
| 3 | 1 | 1 | 1 | 0   | 0 | 0 |
| 3 | 1 | 1 | 1 | 0   | 0 | 0 |
| 1 | 1 | 1 | 2 | 0   | 0 | 0 |
| 1 | 1 | 1 | 1 | 6   | 0 | 0 |
| 1 | 1 | 1 | 1 | 6   | 0 | 0 |

|   |   |   |   |     |   |   |
|---|---|---|---|-----|---|---|
| 1 | 1 | 1 | 2 | 18  | 0 | 1 |
| 3 | 1 | 1 | 2 | 10  | 0 | 1 |
| 1 | 1 | 1 | 2 | 29  | 0 | 1 |
| 1 | 1 | 1 | 1 | 10  | 0 | 1 |
| 1 | 1 | 1 | 1 | 6   | 0 | 0 |
| 1 | 1 | 1 | 2 | 28  | 0 | 1 |
| 1 | 1 | 1 | 2 | 0   | 0 | 0 |
| 3 | 1 | 2 | 1 | 4   | 0 | 0 |
| 1 | 1 | 1 | 1 | 10  | 0 | 1 |
| 1 | 1 | 1 | 2 | 0   | 0 | 0 |
| 1 | 1 | 1 | 2 | 0   | 0 | 0 |
| 1 | 1 | 1 | 1 | 0   | 0 | 0 |
| 1 | 1 | 2 | 1 | 307 | 1 |   |
| 1 | 1 | 1 | 2 | 0   | 0 | 0 |
| 1 | 1 | 1 | 1 | 5   | 0 | 0 |
| 3 | 1 | 1 | 2 | 0   | 0 | 0 |
| 1 | 1 | 1 | 2 | 32  | 0 | 1 |
| 3 | 1 | 2 | 1 | 306 | 1 |   |
| 1 | 1 | 1 | 2 | 20  | 0 | 1 |
| 1 | 1 | 1 | 1 | 5   | 0 | 0 |
| 1 | 1 | 1 | 2 | 13  | 0 | 1 |
| 1 | 1 | 1 | 2 | 1   | 0 | 0 |
| 1 | 1 | 1 | 1 | 5   | 0 | 0 |
| 1 | 1 | 1 | 2 | 5   | 0 | 0 |
| 1 | 1 | 1 | 2 | 0   | 0 | 0 |
| 1 | 1 | 1 | 2 | 14  | 0 | 1 |
| 1 | 1 | 1 | 2 | 16  | 0 | 1 |
| 3 | 1 | 1 | 1 | 8   | 0 | 1 |
| 3 | 1 | 1 | 1 | 0   | 0 | 0 |
| 1 | 1 | 1 | 2 | 26  | 0 | 1 |
| 3 | 1 | 2 | 1 | 289 | 1 |   |
| 1 | 1 | 1 | 2 | 12  | 0 | 1 |
| 1 | 1 | 1 | 1 | 3   | 0 | 0 |
| 3 | 1 | 1 | 1 | 4   | 0 | 0 |
| 1 | 1 | 1 | 1 | 0   | 0 | 0 |
| 1 | 1 | 1 | 1 | 249 | 1 |   |
| 1 | 1 | 1 | 2 | 1   | 0 | 0 |
| 1 | 1 | 1 | 1 | 2   | 0 | 0 |
| 1 | 1 | 1 | 1 | 2   | 0 | 0 |
| 3 | 1 | 1 | 2 | 11  | 0 | 1 |
| 1 | 1 | 1 | 2 | 5   | 0 | 0 |
| 1 | 1 | 1 | 1 | 7   | 0 | 0 |
| 1 | 1 | 1 | 1 | 5   | 0 | 0 |
| 1 | 1 | 1 | 2 | 19  | 0 | 1 |
| 3 | 1 | 1 | 2 | 0   | 0 | 0 |
| 1 | 1 | 1 | 2 | 30  | 0 | 1 |
| 1 | 1 | 1 | 1 | 9   | 0 | 1 |
| 1 | 2 | 1 | 3 | 40  | 0 | 1 |
| 1 | 1 | 1 | 2 | 24  | 0 | 1 |
| 1 | 1 | 1 | 1 | 4   | 0 | 0 |
| 1 | 1 | 1 | 2 | 1   | 0 | 0 |
| 1 | 1 | 1 | 2 | 0   | 0 | 0 |
| 1 | 1 | 1 | 2 | 83  | 0 | 1 |
| 1 | 1 | 1 | 2 | 123 | 0 | 1 |

|   |   |   |   |     |   |   |
|---|---|---|---|-----|---|---|
| 1 | 1 | 1 | 2 | 31  | 0 | 1 |
| 1 | 1 | 1 | 1 | 13  | 0 | 1 |
| 1 | 1 | 1 | 2 | 47  | 0 | 1 |
| 1 | 1 | 1 | 1 | 11  | 0 | 1 |
| 1 | 2 | 1 | 3 | 8   | 0 | 1 |
| 1 | 1 | 1 | 1 | 4   | 0 | 0 |
| 1 | 1 | 1 | 1 | 8   | 0 | 1 |
| 1 | 1 | 1 | 2 | 9   | 0 | 1 |
| 1 | 1 | 1 | 1 | 10  | 0 | 1 |
| 1 | 1 | 2 | 1 | 244 | 1 |   |
| 1 | 1 | 1 | 2 | 27  | 0 | 1 |
| 1 | 1 | 1 | 1 | 6   | 0 | 0 |
| 1 | 1 | 1 | 2 | 55  | 0 | 1 |
| 1 | 1 | 1 | 2 | 1   | 0 | 0 |
| 1 | 2 | 1 | 3 | 1   | 0 | 0 |
| 1 | 1 | 1 | 2 | 96  | 0 | 1 |
| 1 | 1 | 1 | 1 | 16  | 0 | 1 |
| 1 | 1 | 1 | 1 | 0   | 0 | 0 |
| 1 | 1 | 1 | 1 | 6   | 0 | 0 |
| 1 | 1 | 2 | 2 | 12  | 0 | 1 |
| 1 | 1 | 2 | 2 | 0   | 0 | 0 |
| 1 | 1 | 1 | 1 | 4   | 0 | 0 |
| 1 | 1 | 1 | 2 | 20  | 0 | 1 |
| 1 | 1 | 1 | 2 | 20  | 0 | 1 |
| 1 | 1 | 2 | 2 | 23  | 0 | 1 |
| 3 | 1 | 1 | 1 | 3   | 0 | 0 |
| 1 | 1 | 1 | 2 | 36  | 0 | 1 |
| 1 | 1 | 1 | 1 | 10  | 0 | 1 |
| 3 | 1 | 1 | 2 | 72  | 0 | 1 |
| 1 | 1 | 1 | 2 | 1   | 0 | 0 |
| 3 | 1 | 1 | 1 | 26  | 0 | 1 |
| 1 | 1 | 2 | 1 | 6   | 0 | 0 |
| 1 | 1 | 1 | 2 | 14  | 0 | 1 |
| 1 | 1 | 1 | 1 | 6   | 0 | 0 |
| 1 | 1 | 1 | 1 | 6   | 0 | 0 |
| 1 | 2 | 1 | 3 | 0   | 0 | 0 |
| 1 | 1 | 1 | 2 | 0   | 0 | 0 |
| 1 | 1 | 1 | 2 | 6   | 0 | 0 |
| 1 | 1 | 1 | 1 | 15  | 0 | 1 |
| 3 | 1 | 1 | 1 | 25  | 0 | 1 |
| 1 | 1 | 1 | 2 | 167 | 0 | 1 |
| 1 | 1 | 1 | 2 | 28  | 0 | 1 |
| 1 | 1 | 1 | 1 | 1   | 0 | 0 |
| 1 | 1 | 1 | 2 | 66  | 0 | 1 |
| 1 | 1 | 1 | 2 | 13  | 0 | 1 |
| 1 | 1 | 1 | 2 | 26  | 0 | 1 |
| 1 | 1 | 1 | 2 | 14  | 0 | 1 |
| 3 | 1 | 1 | 2 | 209 | 1 |   |
| 3 | 1 | 1 | 2 | 136 | 0 | 1 |
| 3 | 2 | 1 | 3 | 8   | 0 | 1 |
| 3 | 1 | 1 | 1 | 0   | 0 | 0 |
| 1 | 1 | 1 | 1 | 0   | 0 | 0 |
| 1 | 1 | 1 | 2 | 36  | 0 | 1 |
| 1 | 1 | 1 | 2 | 0   | 0 | 0 |

|   |   |   |   |     |   |   |
|---|---|---|---|-----|---|---|
| 3 | 1 | 1 | 2 | 2   | 0 | 0 |
| 1 | 1 | 1 | 2 | 22  | 0 | 1 |
| 1 | 1 | 1 | 1 | 2   | 0 | 0 |
| 1 | 1 | 1 | 2 | 45  | 0 | 1 |
| 1 | 1 | 1 | 2 | 75  | 0 | 1 |
| 1 | 1 | 1 | 2 | 18  | 0 | 1 |
| 1 | 1 | 1 | 2 | 154 | 0 | 1 |
| 1 | 1 | 1 | 2 | 2   | 0 | 0 |
| 1 | 2 | 1 | 3 | 0   | 0 | 0 |
| 1 | 2 | 1 | 3 | 0   | 0 | 0 |
| 1 | 1 | 1 | 2 | 72  | 0 | 1 |
| 1 | 1 | 1 | 2 | 23  | 0 | 1 |
| 3 | 1 | 1 | 1 | 0   | 0 | 0 |
| 3 | 1 | 1 | 1 | 10  | 0 | 1 |
| 1 | 1 | 1 | 2 | 67  | 0 | 1 |
| 3 | 1 | 2 | 2 | 48  | 0 | 1 |
| 1 | 1 | 1 | 1 | 61  | 0 | 1 |
| 1 | 1 | 1 | 1 | 3   | 0 | 0 |
| 3 | 1 | 1 | 2 | 10  | 0 | 1 |
| 1 | 1 | 1 | 1 | 9   | 0 | 1 |
| 3 | 1 | 2 | 2 | 135 | 0 | 1 |
| 1 | 1 | 1 | 2 | 59  | 0 | 1 |
| 1 | 1 | 1 | 1 | 4   | 0 | 0 |
| 1 | 1 | 1 | 1 | 9   | 0 | 1 |
| 1 | 1 | 1 | 2 | 1   | 0 | 0 |
| 1 | 1 | 1 | 1 | 7   | 0 | 0 |
| 1 | 1 | 1 | 2 | 11  | 0 | 1 |
| 3 | 1 | 2 | 1 | 14  | 0 | 1 |
| 1 | 1 | 1 | 2 | 19  | 0 | 1 |
| 1 | 1 | 1 | 1 | 10  | 0 | 1 |
| 1 | 1 | 1 | 2 | 1   | 0 | 0 |
| 3 | 1 | 2 | 1 | 60  | 0 | 1 |
| 1 | 1 | 1 | 2 | 196 | 1 |   |
| 1 | 1 | 1 | 1 | 11  | 0 | 1 |
| 3 | 1 | 1 | 1 | 7   | 0 | 0 |
| 3 | 1 | 1 | 2 | 31  | 0 | 1 |
| 1 | 1 | 1 | 1 | 24  | 0 | 1 |
| 1 | 1 | 1 | 2 | 23  | 0 | 1 |
| 1 | 1 | 1 | 1 | 6   | 0 | 0 |
| 1 | 1 | 1 | 2 | 20  | 0 | 1 |
| 1 | 1 | 1 | 2 | 69  | 0 | 1 |
| 1 | 1 | 1 | 1 | 10  | 0 | 1 |
| 3 | 1 | 1 | 1 | 3   | 0 | 0 |
| 1 | 1 | 1 | 1 | 2   | 0 | 0 |
| 3 | 1 | 1 | 2 | 0   | 0 | 0 |
| 1 | 1 | 1 | 2 | 45  | 0 | 1 |
| 1 | 1 | 1 | 1 | 4   | 0 | 0 |
| 1 | 1 | 1 | 2 | 77  | 0 | 1 |
| 1 | 1 | 1 | 2 | 13  | 0 | 1 |
| 1 | 1 | 1 | 2 | 111 | 0 | 1 |
| 1 | 1 | 1 | 2 | 20  | 0 | 1 |
| 1 | 1 | 1 | 2 | 0   | 0 | 0 |
| 1 | 1 | 2 | 2 | 0   | 0 | 0 |
| 3 | 1 | 1 | 1 | 10  | 0 | 1 |

|   |   |   |   |     |   |   |
|---|---|---|---|-----|---|---|
| 1 | 1 | 1 | 1 | 6   | 0 | 0 |
| 1 | 1 | 1 | 1 | 36  | 0 | 1 |
| 1 | 1 | 1 | 1 | 1   | 0 | 0 |
| 1 | 1 | 1 | 2 | 51  | 0 | 1 |
| 1 | 1 | 1 | 2 | 15  | 0 | 1 |
| 1 | 1 | 1 | 1 | 8   | 0 | 1 |
| 1 | 1 | 1 | 2 | 69  | 0 | 1 |
| 3 | 1 | 1 | 2 | 10  | 0 | 1 |
| 3 | 1 | 1 | 2 | 7   | 0 | 0 |
| 1 | 1 | 1 | 1 | 5   | 0 | 0 |
| 1 | 1 | 1 | 1 | 11  | 0 | 1 |
| 1 | 1 | 1 | 2 | 3   | 0 | 0 |
| 3 | 2 | 1 | 3 | 23  | 0 | 1 |
| 1 | 1 | 1 | 2 | 99  | 0 | 1 |
| 1 | 1 | 1 | 2 | 7   | 0 | 0 |
| 1 | 1 | 1 | 2 | 1   | 0 | 0 |
| 3 | 1 | 1 | 1 | 0   | 0 | 0 |
| 1 | 1 | 1 | 2 | 19  | 0 | 1 |
| 1 | 1 | 2 | 2 | 0   | 0 | 0 |
| 1 | 1 | 1 | 1 | 8   | 0 | 1 |
| 1 | 1 | 1 | 1 | 9   | 0 | 1 |
| 1 | 1 | 1 | 2 | 0   | 0 | 0 |
| 1 | 1 | 1 | 2 | 3   | 0 | 0 |
| 3 | 1 | 1 | 2 | 13  | 0 | 1 |
| 1 | 1 | 1 | 2 | 2   | 0 | 0 |
| 1 | 1 | 1 | 2 | 3   | 0 | 0 |
| 1 | 1 | 1 | 2 | 1   | 0 | 0 |
| 1 | 1 | 1 | 2 | 5   | 0 | 0 |
| 1 | 1 | 1 | 2 | 22  | 0 | 1 |
| 3 | 1 | 1 | 2 | 10  | 0 | 1 |
| 3 | 1 | 1 | 1 | 3   | 0 | 0 |
| 1 | 1 | 2 | 1 | 3   | 0 | 0 |
| 3 | 2 | 1 | 3 | 13  | 0 | 1 |
| 3 | 1 | 1 | 2 | 2   | 0 | 0 |
| 3 | 1 | 1 | 2 | 3   | 0 | 0 |
| 1 | 1 | 1 | 2 | 0   | 0 | 0 |
| 1 | 1 | 1 | 2 | 39  | 0 | 1 |
| 3 | 1 | 2 | 1 | 16  | 0 | 1 |
| 3 | 1 | 2 | 1 | 19  | 0 | 1 |
| 1 | 2 | 1 | 3 | 0   | 0 | 0 |
| 3 | 1 | 1 | 2 | 34  | 0 | 1 |
| 1 | 1 | 1 | 1 | 0   | 0 | 0 |
| 1 | 1 | 1 | 2 | 120 | 0 | 1 |
| 1 | 1 | 1 | 2 | 26  | 0 | 1 |
| 1 | 1 | 2 | 2 | 30  | 0 | 1 |
| 3 | 1 | 1 | 2 | 0   | 0 | 0 |
| 3 | 1 | 1 | 2 | 0   | 0 | 0 |
| 3 | 1 | 1 | 2 | 8   | 0 | 1 |
| 1 | 1 | 1 | 1 | 6   | 0 | 0 |
| 1 | 1 | 1 | 2 | 4   | 0 | 0 |
| 3 | 1 | 1 | 2 | 26  | 0 | 1 |
| 1 | 1 | 1 | 2 | 14  | 0 | 1 |
| 1 | 1 | 1 | 1 | 10  | 0 | 1 |
| 1 | 1 | 2 | 1 | 0   | 0 | 0 |

|   |   |   |   |     |   |   |
|---|---|---|---|-----|---|---|
| 3 | 1 | 1 | 2 | 8   | 0 | 1 |
| 1 | 1 | 1 | 1 | 8   | 0 | 1 |
| 1 | 1 | 1 | 2 | 41  | 0 | 1 |
| 3 | 1 | 1 | 1 | 9   | 0 | 1 |
| 1 | 1 | 1 | 2 | 41  | 0 | 1 |
| 1 | 1 | 2 | 2 | 0   | 0 | 0 |
| 3 | 1 | 2 | 2 | 15  | 0 | 1 |
| 1 | 1 | 1 | 2 | 0   | 0 | 0 |
| 1 | 1 | 1 | 2 | 25  | 0 | 1 |
| 1 | 1 | 1 | 2 | 8   | 0 | 1 |
| 1 | 1 | 1 | 2 | 0   | 0 | 0 |
| 3 | 1 | 1 | 1 | 0   | 0 | 0 |
| 3 | 1 | 1 | 1 | 12  | 0 | 1 |
| 1 | 1 | 1 | 2 | 38  | 0 | 1 |
| 3 | 1 | 1 | 1 | 3   | 0 | 0 |
| 3 | 1 | 1 | 1 | 6   | 0 | 0 |
| 1 | 1 | 1 | 2 | 11  | 0 | 1 |
| 3 | 1 | 1 | 2 | 0   | 0 | 0 |
| 1 | 1 | 1 | 2 | 36  | 0 | 1 |
| 1 | 1 | 1 | 2 | 44  | 0 | 1 |
| 1 | 1 | 1 | 2 | 39  | 0 | 1 |
| 1 | 1 | 2 | 1 | 7   | 0 | 0 |
| 3 | 1 | 1 | 1 | 2   | 0 | 0 |
| 1 | 1 | 1 | 2 | 0   | 0 | 0 |
| 1 | 1 | 1 | 2 | 129 | 0 | 1 |
| 1 | 1 | 2 | 2 | 29  | 0 | 1 |
| 1 | 1 | 1 | 2 | 0   | 0 | 0 |
| 3 | 1 | 1 | 2 | 21  | 0 | 1 |
| 1 | 1 | 1 | 2 | 0   | 0 | 0 |
| 3 | 1 | 1 | 2 | 16  | 0 | 1 |
| 1 | 1 | 1 | 2 | 7   | 0 | 0 |
| 1 | 1 | 1 | 1 | 35  | 0 | 1 |
| 3 | 1 | 1 | 2 | 23  | 0 | 1 |
| 3 | 1 | 1 | 1 | 8   | 0 | 1 |
| 1 | 1 | 1 | 2 | 15  | 0 | 1 |
| 1 | 1 | 1 | 2 | 13  | 0 | 1 |
| 1 | 1 | 1 | 2 | 12  | 0 | 1 |
| 3 | 1 | 1 | 1 | 0   | 0 | 0 |
| 1 | 1 | 1 | 2 | 8   | 0 | 1 |
| 3 | 1 | 1 | 2 | 9   | 0 | 1 |
| 3 | 1 | 1 | 2 | 57  | 0 | 1 |
| 1 | 1 | 2 | 2 | 7   | 0 | 0 |
| 1 | 1 | 1 | 2 | 9   | 0 | 1 |
| 1 | 1 | 1 | 1 | 4   | 0 | 0 |
| 1 | 1 | 1 | 2 | 7   | 0 | 0 |
| 3 | 1 | 1 | 2 | 8   | 0 | 1 |
| 1 | 1 | 1 | 2 | 78  | 0 | 1 |
| 1 | 1 | 1 | 2 | 0   | 0 | 0 |
| 1 | 1 | 1 | 2 | 35  | 0 | 1 |
| 1 | 1 | 1 | 2 | 12  | 0 | 1 |
| 1 | 1 | 1 | 2 | 36  | 0 | 1 |
| 3 | 1 | 1 | 1 | 0   | 0 | 0 |
| 3 | 1 | 1 | 1 | 1   | 0 | 0 |
| 1 | 2 | 1 | 3 | 1   | 0 | 0 |



|   |   |   |   |    |   |   |
|---|---|---|---|----|---|---|
| 3 | 1 | 1 | 2 | 0  | 0 | 0 |
| 3 | 1 | 1 | 1 | 13 | 0 | 1 |
| 1 | 1 | 1 | 2 | 23 | 0 | 1 |
| 1 | 1 | 1 | 1 | 6  | 0 | 0 |
| 3 | 1 | 1 | 2 | 0  | 0 | 0 |
| 1 | 1 | 1 | 1 | 10 | 0 | 1 |
| 1 | 1 | 1 | 1 | 0  | 0 | 0 |
| 1 | 1 | 1 | 2 | 66 | 0 | 1 |
| 3 | 1 | 1 | 2 | 10 | 0 | 1 |
| 1 | 1 | 1 | 2 | 0  | 0 | 0 |
| 3 | 1 | 1 | 1 | 32 | 0 | 1 |
| 1 | 1 | 1 | 2 | 20 | 0 | 1 |
| 1 | 1 | 1 | 2 | 10 | 0 | 1 |
| 1 | 1 | 1 | 1 | 8  | 0 | 1 |
| 1 | 1 | 1 | 2 | 5  | 0 | 0 |
| 3 | 1 | 1 | 2 | 40 | 0 | 1 |
| 3 | 1 | 1 | 2 | 38 | 0 | 1 |
| 1 | 1 | 1 | 2 | 15 | 0 | 1 |
| 3 | 1 | 1 | 1 | 11 | 0 | 1 |
| 1 | 1 | 1 | 2 | 0  | 0 | 0 |
| 1 | 1 | 1 | 1 | 1  | 0 | 0 |
| 3 | 1 | 1 | 2 | 1  | 0 | 0 |
| 1 | 1 | 1 | 2 | 21 | 0 | 1 |
| 1 | 1 | 1 | 2 | 7  | 0 | 0 |
| 3 | 1 | 1 | 2 | 26 | 0 | 1 |
| 3 | 1 | 1 | 1 | 8  | 0 | 1 |
| 1 | 1 | 1 | 2 | 22 | 0 | 1 |
| 3 | 1 | 1 | 1 | 6  | 0 | 0 |
| 1 | 1 | 1 | 2 | 17 | 0 | 1 |
| 1 | 1 | 1 | 2 | 6  | 0 | 0 |
| 1 | 1 | 1 | 1 | 0  | 0 | 0 |
| 3 | 1 | 1 | 2 | 24 | 0 | 1 |
| 3 | 1 | 1 | 2 | 30 | 0 | 1 |
| 3 | 1 | 1 | 1 | 7  | 0 | 0 |
| 1 | 1 | 1 | 2 | 28 | 0 | 1 |
| 1 | 1 | 1 | 2 | 46 | 0 | 1 |
| 3 | 1 | 1 | 2 | 70 | 0 | 1 |
| 1 | 1 | 1 | 2 | 0  | 0 | 0 |
| 3 | 1 | 1 | 2 | 16 | 0 | 1 |
| 3 | 1 | 1 | 2 | 0  | 0 | 0 |
| 1 | 1 | 1 | 1 | 0  | 0 | 0 |
| 3 | 1 | 1 | 2 | 0  | 0 | 0 |
| 1 | 1 | 1 | 1 | 0  | 0 | 0 |
| 1 | 1 | 1 | 1 | 6  | 0 | 0 |
| 3 | 1 | 1 | 1 | 0  | 0 | 0 |
| 1 | 1 | 1 | 2 | 11 | 0 | 1 |
| 1 | 1 | 1 | 1 | 5  | 0 | 0 |
| 3 | 1 | 1 | 1 | 8  | 0 | 1 |
| 1 | 1 | 1 | 1 | 0  | 0 | 0 |
| 3 | 2 | 1 | 3 | 2  | 0 | 0 |
| 1 | 1 | 1 | 2 | 8  | 0 | 1 |
| 3 | 1 | 1 | 2 | 15 | 0 | 1 |
| 1 | 1 | 1 | 1 | 10 | 0 | 1 |
| 3 | 1 | 1 | 2 | 9  | 0 | 1 |

|   |   |   |   |    |   |   |
|---|---|---|---|----|---|---|
| 3 | 2 | 1 | 3 | 0  | 0 | 0 |
| 1 | 1 | 1 | 1 | 3  | 0 | 0 |
| 3 | 1 | 1 | 2 | 7  | 0 | 0 |
| 3 | 1 | 1 | 2 | 17 | 0 | 1 |
| 3 | 1 | 1 | 2 | 33 | 0 | 1 |
| 3 | 1 | 1 | 1 | 0  | 0 | 0 |
| 3 | 1 | 2 | 1 | 1  | 0 | 0 |
| 3 | 1 | 2 | 2 | 6  | 0 | 0 |
| 3 | 1 | 2 | 1 | 0  | 0 | 0 |
| 3 | 1 | 1 | 2 | 41 | 0 | 1 |
| 3 | 1 | 1 | 1 | 9  | 0 | 1 |
| 1 | 1 | 1 | 2 | 29 | 0 | 1 |
| 1 | 1 | 1 | 2 | 0  | 0 | 0 |
| 3 | 1 | 1 | 2 | 18 | 0 | 1 |
| 1 | 1 | 1 | 2 | 19 | 0 | 1 |
| 1 | 1 | 1 | 2 | 0  | 0 | 0 |
| 1 | 1 | 1 | 1 | 0  | 0 | 0 |
| 1 | 1 | 1 | 2 | 35 | 0 | 1 |
| 1 | 1 | 1 | 1 | 5  | 0 | 0 |
| 3 | 1 | 1 | 1 | 2  | 0 | 0 |
| 3 | 1 | 1 | 2 | 19 | 0 | 1 |
| 3 | 1 | 1 | 2 | 0  | 0 | 0 |
| 3 | 1 | 1 | 2 | 28 | 0 | 1 |
| 1 | 1 | 1 | 1 | 6  | 0 | 0 |
| 1 | 1 | 1 | 1 | 0  | 0 | 0 |
| 1 | 1 | 1 | 1 | 5  | 0 | 0 |
| 1 | 1 | 1 | 1 | 2  | 0 | 0 |
| 1 | 1 | 1 | 2 | 7  | 0 | 0 |
| 3 | 1 | 1 | 2 | 2  | 0 | 0 |
| 1 | 1 | 1 | 2 | 0  | 0 | 0 |
| 1 | 1 | 1 | 1 | 0  | 0 | 0 |
| 1 | 1 | 1 | 2 | 21 | 0 | 1 |
| 1 | 1 | 1 | 2 | 6  | 0 | 0 |
| 1 | 1 | 1 | 2 | 0  | 0 | 0 |
| 1 | 1 | 1 | 2 | 0  | 0 | 0 |
| 1 | 1 | 1 | 2 | 14 | 0 | 1 |
| 1 | 1 | 1 | 2 | 4  | 0 | 0 |
| 1 | 1 | 1 | 2 | 5  | 0 | 0 |
| 1 | 1 | 1 | 2 | 5  | 0 | 0 |
| 1 | 1 | 1 | 1 | 2  | 0 | 0 |
| 1 | 1 | 1 | 2 | 7  | 0 | 0 |
| 1 | 1 | 1 | 1 | 6  | 0 | 0 |
| 1 | 1 | 2 | 2 | 4  | 0 | 0 |
| 1 | 1 | 1 | 2 | 16 | 0 | 1 |
| 1 | 1 | 1 | 1 | 7  | 0 | 0 |
| 1 | 1 | 1 | 2 | 9  | 0 | 1 |
| 1 | 1 | 1 | 1 | 6  | 0 | 0 |
| 1 | 1 | 1 | 1 | 5  | 0 | 0 |
| 3 | 2 | 1 | 3 | 32 | 0 | 1 |
| 1 | 1 | 1 | 2 | 0  | 0 | 0 |
| 1 | 1 | 1 | 1 | 2  | 0 | 0 |
| 3 | 1 | 1 | 1 | 0  | 0 | 0 |
| 1 | 1 | 1 | 1 | 2  | 0 | 0 |
| 1 | 1 | 1 | 2 | 18 | 0 | 1 |









|   |   |   |   |    |   |   |
|---|---|---|---|----|---|---|
| 1 | 1 |   |   |    | 1 |   |
| 3 | 1 |   |   |    | 1 |   |
| 1 | 1 |   |   |    | 1 |   |
| 1 | 1 |   |   |    | 1 |   |
| 1 | 1 |   |   |    | 1 |   |
| 1 | 1 | 1 | 2 | 4  | 0 | 0 |
| 1 | 1 |   |   |    | 1 |   |
| 1 | 1 |   |   |    | 1 |   |
| 1 | 1 |   |   |    | 1 |   |
| 1 | 1 |   |   |    | 1 |   |
| 1 | 1 |   |   |    | 1 |   |
| 1 | 1 |   |   |    | 1 |   |
| 1 | 1 |   |   |    | 1 |   |
| 1 | 1 |   |   |    | 1 |   |
| 1 | 1 |   |   |    | 1 |   |
| 1 | 1 |   |   |    | 1 |   |
| 1 | 1 |   |   |    | 1 |   |
| 1 | 1 |   |   |    | 1 |   |
| 1 | 1 |   |   |    | 1 |   |
| 1 | 1 |   |   |    | 1 |   |
| 1 | 1 | 1 | 1 | 8  | 0 | 1 |
| 1 | 1 |   |   |    | 1 |   |
| 1 | 1 |   |   |    | 1 |   |
| 1 | 1 |   |   |    | 1 |   |
| 1 | 1 |   |   |    | 1 |   |
| 1 | 1 |   |   |    | 1 |   |
| 1 | 1 |   |   |    | 1 |   |
| 1 | 1 |   |   |    | 1 |   |
| 1 | 1 |   |   |    | 1 |   |
| 1 | 1 |   |   |    | 1 |   |
| 1 | 1 |   |   |    | 1 |   |
| 1 | 1 |   |   |    | 1 |   |
| 1 | 1 |   |   |    | 1 |   |
| 1 | 1 | 1 | 2 | 3  | 0 | 0 |
| 1 | 1 | 1 | 2 | 13 | 0 | 1 |
| 1 | 1 |   |   |    | 1 |   |
| 1 | 1 |   |   |    | 1 |   |
| 1 | 1 |   |   |    | 1 |   |
| 1 | 1 |   |   |    | 1 |   |
| 1 | 1 |   |   |    | 1 |   |
| 3 | 1 |   |   |    | 1 |   |
| 3 | 1 | 1 | 1 | 2  | 0 | 0 |
| 1 | 1 |   |   |    | 1 |   |
| 1 | 1 |   |   |    | 1 |   |
| 1 | 1 |   |   |    | 1 |   |
| 1 | 1 |   |   |    | 1 |   |
| 1 | 2 |   |   |    | 1 |   |
| 1 | 1 |   |   |    | 1 |   |
| 1 | 2 |   |   |    | 1 |   |
| 3 | 2 |   |   |    | 1 |   |
| 1 | 1 |   |   |    | 1 |   |
| 1 | 1 | 1 | 2 | 0  | 0 | 0 |
| 1 | 1 |   |   |    | 1 |   |
| 1 | 2 |   |   |    | 1 |   |
| 1 | 2 |   |   |    | 1 |   |
| 1 | 1 |   |   |    | 1 |   |
| 1 | 1 |   |   |    | 1 |   |





|   |   |   |   |     |   |   |
|---|---|---|---|-----|---|---|
| 1 | 1 |   |   |     | 1 |   |
| 1 | 2 |   |   |     | 1 |   |
| 3 | 1 |   |   |     | 1 |   |
| 3 | 1 |   |   |     | 1 |   |
| 1 | 1 |   |   |     | 1 |   |
| 3 | 1 | 1 | 2 | 0   | 0 | 0 |
| 1 | 1 |   |   |     | 1 |   |
| 1 | 1 |   |   |     | 1 |   |
| 3 | 2 |   |   |     | 1 |   |
| 1 | 1 |   |   |     | 1 |   |
| 1 | 1 | 1 | 2 | 63  | 0 | 1 |
| 1 | 1 |   |   |     | 1 |   |
| 1 | 1 | 1 | 2 | 0   | 0 | 0 |
| 1 | 1 |   |   |     | 1 |   |
| 1 | 1 |   |   |     | 1 |   |
| 1 | 1 |   |   |     | 1 |   |
| 1 | 1 | 1 | 2 | 9   | 0 | 1 |
| 1 | 1 |   |   |     | 1 |   |
| 1 | 2 |   |   |     | 1 |   |
| 1 | 2 |   |   |     | 1 |   |
| 1 | 2 | 1 | 3 | 12  | 0 | 1 |
| 1 | 1 | 1 | 2 | 6   | 0 | 0 |
| 1 | 1 | 1 | 2 | 47  | 0 | 1 |
| 1 | 1 | 1 | 2 | 56  | 0 | 1 |
| 1 | 1 | 1 | 1 | 1   | 0 | 0 |
| 1 | 1 | 2 | 2 | 37  | 0 | 1 |
| 1 | 1 | 1 | 1 | 227 | 1 |   |
| 1 | 1 | 1 | 2 | 449 | 1 |   |
| 1 | 1 | 1 | 2 | 251 | 1 |   |
| 1 | 1 | 2 | 1 | 304 | 1 |   |
| 1 | 1 | 1 | 2 | 448 | 1 |   |
| 1 | 1 | 1 | 1 | 327 | 1 |   |
| 1 | 1 | 1 | 2 | 170 | 0 | 1 |
| 3 | 1 | 2 | 1 | 416 | 1 |   |
| 1 | 1 | 1 | 2 | 127 | 0 | 1 |
| 1 | 1 | 1 | 2 | 157 | 0 | 1 |
| 1 | 1 | 2 | 2 | 328 | 1 |   |
| 1 | 1 | 1 | 1 | 28  | 0 | 1 |
| 1 | 1 | 1 | 2 | 29  | 0 | 1 |
| 1 | 1 | 1 | 2 | 27  | 0 | 1 |
| 1 | 1 | 1 | 1 | 24  | 0 | 1 |
| 3 | 1 | 1 | 2 | 29  | 0 | 1 |
| 1 | 1 | 1 | 1 | 309 | 1 |   |
| 1 | 1 | 1 | 2 | 23  | 0 | 1 |
| 1 | 1 | 1 | 1 | 8   | 0 | 1 |
| 1 | 1 | 1 | 2 | 20  | 0 | 1 |
| 1 | 1 | 2 | 2 | 62  | 0 | 1 |
| 1 | 2 | 1 | 2 | 227 | 1 |   |
| 3 | 1 | 1 | 2 | 458 | 1 |   |
| 3 | 1 | 1 | 2 | 310 | 1 |   |
| 1 | 1 | 1 | 2 | 303 | 1 |   |
| 3 | 1 | 1 | 2 | 295 | 1 |   |
| 1 | 1 | 1 | 1 | 7   | 0 | 0 |

|   |   |   |   |    |   |   |
|---|---|---|---|----|---|---|
| 2 | 1 | 1 | 2 | 2  | 0 | 0 |
| 2 | 1 | 1 | 2 | 2  | 0 | 0 |
| 3 | 1 | 1 | 2 | 2  | 0 | 0 |
| 3 | 1 | 1 | 2 | 1  | 0 | 0 |
| 1 | 1 | 1 | 2 | 30 | 0 | 1 |
| 3 | 2 | 1 | 3 | 2  | 0 | 0 |
| 3 | 1 | 1 | 1 | 5  | 0 | 0 |
| 1 | 1 | 1 | 2 | 26 | 0 | 1 |
| 3 | 1 | 1 | 2 | 4  | 0 | 0 |
| 3 | 1 | 1 | 2 | 3  | 0 | 0 |
| 1 | 1 | 1 | 2 | 45 | 0 | 1 |
| 3 | 1 | 1 | 2 | 4  | 0 | 0 |
| 2 | 1 |   |   |    | 1 |   |
| 2 | 1 |   |   |    | 1 |   |
| 2 | 1 | 2 | 2 | 2  | 0 | 0 |
| 2 | 1 |   |   |    | 1 |   |
| 2 | 1 | 1 | 2 | 3  | 0 | 0 |
| 2 | 1 |   |   |    | 1 |   |
| 2 | 1 | 1 | 2 | 13 | 0 | 1 |
| 2 | 1 | 1 | 2 | 0  | 0 | 0 |
| 2 | 1 | 1 | 2 | 2  | 0 | 0 |
| 2 | 1 | 1 | 1 | 33 | 0 | 1 |
| 2 | 1 | 1 | 2 | 2  | 0 | 0 |
| 1 | 1 | 1 | 1 | 2  | 0 | 0 |
| 1 | 1 | 1 | 2 | 1  | 0 | 0 |
| 1 | 2 | 1 | 3 | 2  | 0 | 0 |
| 1 | 1 | 1 | 2 | 39 | 0 | 1 |
| 1 | 1 | 1 | 2 | 3  | 0 | 0 |
| 3 | 1 | 1 | 2 | 4  | 0 | 0 |
| 1 | 1 | 1 | 1 | 2  | 0 | 0 |
| 3 | 2 | 1 | 3 | 1  | 0 | 0 |
| 3 | 1 | 2 | 1 | 7  | 0 | 0 |
| 1 | 1 | 1 | 2 | 3  | 0 | 0 |
| 3 | 1 | 1 | 2 | 2  | 0 | 0 |
| 2 | 1 | 1 | 2 | 12 | 0 | 1 |
| 3 | 1 | 2 | 2 | 4  | 0 | 0 |
| 3 | 1 | 1 | 2 | 30 | 0 | 1 |
| 1 | 1 | 1 | 2 | 28 | 0 | 1 |
| 1 | 1 | 1 | 2 | 5  | 0 | 0 |
| 3 | 1 | 1 | 2 | 4  | 0 | 0 |
| 2 | 1 | 1 | 2 | 1  | 0 | 0 |
| 1 | 1 | 1 | 2 | 1  | 0 | 0 |
| 3 | 1 | 1 | 1 | 3  | 0 | 0 |
| 1 | 1 | 1 | 2 | 2  | 0 | 0 |
| 3 | 1 | 1 | 2 | 5  | 0 | 0 |
| 3 | 1 | 1 | 2 | 2  | 0 | 0 |
| 1 | 1 | 1 | 2 | 29 | 0 | 1 |
| 2 | 1 | 2 | 2 | 1  | 0 | 0 |
| 1 | 1 | 1 | 1 | 7  | 0 | 0 |
| 2 | 1 | 1 | 2 | 0  | 0 | 0 |
| 1 | 1 | 1 | 1 | 4  | 0 | 0 |
| 3 | 1 | 1 | 2 | 5  | 0 | 0 |
| 3 | 1 | 1 | 2 | 5  | 0 | 0 |
| 3 | 1 | 1 | 2 | 34 | 0 | 1 |

|   |   |   |   |    |   |   |
|---|---|---|---|----|---|---|
| 3 | 1 | 2 | 1 | 6  | 0 | 0 |
| 3 | 1 | 1 | 2 | 4  | 0 | 0 |
| 1 | 2 | 1 | 3 | 3  | 0 | 0 |
| 3 | 1 | 1 | 1 | 0  | 0 | 0 |
| 1 | 1 | 1 | 2 | 1  | 0 | 0 |
| 3 | 1 | 1 | 1 | 2  | 0 | 0 |
| 3 | 1 | 1 | 1 | 0  | 0 | 0 |
| 2 | 1 | 1 | 2 | 5  | 0 | 0 |
| 2 | 1 | 2 | 1 | 0  | 0 | 0 |
| 1 | 1 | 1 | 2 | 5  | 0 | 0 |
| 1 | 2 |   |   |    | 1 |   |
| 1 | 1 | 1 | 2 | 32 | 0 | 1 |
| 2 | 1 | 1 | 2 | 14 | 0 | 1 |
| 2 | 1 | 1 | 1 | 2  | 0 | 0 |
| 1 | 1 | 1 | 2 | 3  | 0 | 0 |
| 3 | 2 | 1 | 3 | 3  | 0 | 0 |
| 2 | 1 | 1 | 2 | 1  | 0 | 0 |
| 1 | 1 | 1 | 2 | 52 | 0 | 1 |
| 2 | 1 | 1 | 2 | 7  | 0 | 0 |
| 2 | 1 | 1 | 2 | 3  | 0 | 0 |
| 2 | 1 | 1 | 2 | 7  | 0 | 0 |
| 3 | 1 | 1 | 2 | 1  | 0 | 0 |
| 2 | 1 | 1 | 2 | 0  | 0 | 0 |
| 2 | 1 | 1 | 1 | 2  | 0 | 0 |
| 3 | 1 | 1 | 1 | 1  | 0 | 0 |
| 1 | 1 | 1 | 2 | 1  | 0 | 0 |
| 2 | 2 | 1 | 3 | 0  | 0 | 0 |
| 2 | 1 | 1 | 1 | 1  | 0 | 0 |
| 2 | 1 | 2 | 2 | 1  | 0 | 0 |
| 2 | 1 | 1 | 2 | 38 | 0 | 1 |
| 2 | 1 | 1 | 2 | 1  | 0 | 0 |
| 2 | 1 | 1 | 2 | 8  | 0 | 1 |
| 1 | 2 | 2 | 3 | 1  | 0 | 0 |
| 3 | 1 | 1 | 2 | 0  | 0 | 0 |
| 3 | 1 | 1 | 2 | 9  | 0 | 1 |
| 3 | 1 | 1 | 2 | 2  | 0 | 0 |
| 2 | 1 | 1 | 1 | 2  | 0 | 0 |
| 3 | 1 | 1 | 1 | 26 | 0 | 1 |
| 2 | 1 | 1 | 2 | 1  | 0 | 0 |
| 3 | 1 | 1 | 1 | 4  | 0 | 0 |
| 1 | 1 | 1 | 2 | 1  | 0 | 0 |
| 3 | 1 | 1 | 1 | 1  | 0 | 0 |
| 3 | 2 | 1 | 3 | 2  | 0 | 0 |
| 3 | 1 | 1 | 1 | 1  | 0 | 0 |
| 3 | 1 | 1 | 2 | 4  | 0 | 0 |
| 3 | 1 | 1 | 1 | 1  | 0 | 0 |
| 3 | 1 | 1 | 2 | 2  | 0 | 0 |
| 3 | 1 | 1 | 2 | 2  | 0 | 0 |
| 3 | 1 | 1 | 2 | 2  | 0 | 0 |
| 3 | 1 | 1 | 2 | 5  | 0 | 0 |
| 3 | 1 | 1 | 1 | 2  | 0 | 0 |
| 3 | 1 | 1 | 2 | 0  | 0 | 0 |
| 1 | 1 | 1 | 1 | 5  | 0 | 0 |
| 1 | 1 | 2 | 2 | 4  | 0 | 0 |

|   |   |   |   |    |   |   |
|---|---|---|---|----|---|---|
| 3 | 1 | 1 | 2 | 3  | 0 | 0 |
| 3 | 2 | 1 | 3 | 9  | 0 | 1 |
| 1 | 1 | 1 | 2 | 0  | 0 | 0 |
| 2 | 1 | 2 | 1 | 0  | 0 | 0 |
| 2 | 1 | 1 | 2 | 1  | 0 | 0 |
| 3 | 1 | 1 | 2 | 42 | 0 | 1 |
| 1 | 1 | 1 | 2 | 1  | 0 | 0 |
| 1 | 1 | 1 | 1 | 3  | 0 | 0 |
| 3 | 1 | 1 | 1 | 5  | 0 | 0 |
| 1 | 1 | 1 | 2 | 1  | 0 | 0 |
| 3 | 1 | 1 | 2 | 29 | 0 | 1 |
| 3 | 1 | 1 | 1 | 2  | 0 | 0 |
| 1 | 2 | 1 | 3 | 30 | 0 | 1 |
| 2 | 1 | 1 | 2 | 1  | 0 | 0 |
| 2 | 1 | 1 | 2 | 0  | 0 | 0 |
| 1 | 1 | 1 | 1 | 3  | 0 | 0 |
| 1 | 2 | 1 | 3 | 0  | 0 | 0 |
| 2 | 1 | 2 | 1 | 94 | 0 | 1 |
| 3 | 1 | 1 | 2 | 1  | 0 | 0 |
| 2 | 1 | 1 | 1 | 1  | 0 | 0 |
| 3 | 1 | 1 | 1 | 1  | 0 | 0 |
| 3 | 1 | 1 | 2 | 22 | 0 | 1 |
| 3 | 2 | 1 | 3 | 0  | 0 | 0 |
| 3 | 1 | 1 | 1 | 3  | 0 | 0 |
| 3 | 1 | 1 | 2 | 2  | 0 | 0 |
| 2 | 1 | 1 | 2 | 0  | 0 | 0 |
| 3 | 1 | 1 | 2 | 3  | 0 | 0 |
| 3 | 1 | 1 | 1 | 3  | 0 | 0 |
| 2 | 2 | 2 | 3 | 3  | 0 | 0 |
| 2 | 1 | 1 | 2 | 1  | 0 | 0 |
| 2 | 1 | 1 | 2 | 4  | 0 | 0 |
| 3 | 1 | 1 | 1 | 1  | 0 | 0 |
| 1 | 1 | 1 | 2 | 10 | 0 | 1 |
| 1 | 1 | 1 | 1 | 3  | 0 | 0 |
| 2 | 1 | 1 | 2 | 0  | 0 | 0 |
| 1 | 1 | 1 | 2 | 8  | 0 | 1 |
| 1 | 1 | 1 | 1 | 3  | 0 | 0 |
| 1 | 2 |   |   |    | 1 |   |
| 1 | 2 |   |   |    | 1 |   |
| 1 | 2 |   |   |    | 1 |   |
| 3 | 1 | 1 | 1 | 4  | 0 | 0 |
| 3 | 1 | 1 | 1 | 2  | 0 | 0 |
| 3 | 1 | 1 | 1 | 9  | 0 | 1 |
| 3 | 1 |   |   |    | 1 |   |
| 3 | 1 | 2 | 2 | 53 | 0 | 1 |
| 1 | 1 | 1 | 2 | 2  | 0 | 0 |
| 1 | 2 |   |   |    | 1 |   |
| 1 | 1 | 1 | 1 | 28 | 0 | 1 |
| 2 | 1 | 2 | 2 | 6  | 0 | 0 |
| 2 | 1 | 1 | 2 | 2  | 0 | 0 |
| 2 | 1 | 1 | 1 | 3  | 0 | 0 |
| 3 | 1 | 1 | 1 | 2  | 0 | 0 |
| 3 | 1 | 2 | 1 | 2  | 0 | 0 |
| 2 | 1 | 1 | 2 | 20 | 0 | 1 |

|   |   |   |   |     |   |   |
|---|---|---|---|-----|---|---|
| 3 | 1 | 2 | 2 | 3   | 0 | 0 |
| 1 | 1 | 1 | 1 | 4   | 0 | 0 |
| 3 | 1 | 2 | 1 | 3   | 0 | 0 |
| 3 | 1 |   |   |     | 1 |   |
| 2 | 1 | 1 | 2 | 2   | 0 | 0 |
| 3 | 1 | 1 | 2 | 51  | 0 | 1 |
| 2 | 1 | 2 | 2 | 13  | 0 | 1 |
| 2 | 1 | 1 | 2 | 3   | 0 | 0 |
| 2 | 1 | 1 | 2 | 3   | 0 | 0 |
| 2 | 1 | 1 | 2 | 2   | 0 | 0 |
| 2 | 1 | 1 | 2 | 1   | 0 | 0 |
| 3 | 1 | 1 | 1 | 0   | 0 | 0 |
| 3 | 1 | 1 | 1 | 0   | 0 | 0 |
| 3 | 1 | 1 | 2 | 19  | 0 | 1 |
| 3 | 1 | 1 | 1 | 1   | 0 | 0 |
| 2 | 1 | 1 | 2 | 0   | 0 | 0 |
| 1 | 1 | 1 | 2 | 3   | 0 | 0 |
| 3 | 1 | 1 | 2 | 2   | 0 | 0 |
| 2 | 1 | 1 | 2 | 1   | 0 | 0 |
| 2 | 1 | 1 | 2 | 3   | 0 | 0 |
| 3 | 1 | 1 | 2 | 4   | 0 | 0 |
| 1 | 1 | 1 | 2 | 25  | 0 | 1 |
| 1 | 1 | 2 | 1 | 29  | 0 | 1 |
| 1 | 1 | 1 | 1 | 4   | 0 | 0 |
| 3 | 1 | 1 | 2 | 0   | 0 | 0 |
| 3 | 1 | 2 | 2 | 26  | 0 | 1 |
| 2 | 1 | 2 | 2 | 2   | 0 | 0 |
| 2 | 1 | 1 | 2 | 1   | 0 | 0 |
| 3 | 1 | 1 | 2 | 62  | 0 | 1 |
| 2 | 1 | 1 | 2 | 0   | 0 | 0 |
| 2 | 1 | 1 | 2 | 53  | 0 | 1 |
| 2 | 1 | 1 | 1 | 2   | 0 | 0 |
| 3 | 1 | 1 | 2 | 7   | 0 | 0 |
| 1 | 1 | 1 | 1 | 3   | 0 | 0 |
| 2 | 1 | 1 | 1 | 1   | 0 | 0 |
| 3 | 1 | 1 | 1 | 2   | 0 | 0 |
| 1 | 1 | 1 | 2 | 35  | 0 | 1 |
| 3 | 1 | 1 | 1 | 0   | 0 | 0 |
| 2 | 1 | 1 | 2 | 4   | 0 | 0 |
| 3 | 1 | 2 | 2 | 3   | 0 | 0 |
| 1 | 1 | 1 | 2 | 0   | 0 | 0 |
| 3 | 1 | 1 | 2 | 102 | 0 | 1 |
| 3 | 1 | 1 | 1 | 3   | 0 | 0 |
| 3 | 1 | 1 | 2 | 2   | 0 | 0 |
| 1 | 2 | 1 | 3 | 8   | 0 | 1 |
| 1 | 1 | 1 | 2 | 17  | 0 | 1 |
| 3 | 1 | 1 | 2 | 3   | 0 | 0 |
| 1 | 1 | 1 | 2 | 1   | 0 | 0 |
| 1 | 1 | 1 | 2 | 42  | 0 | 1 |
| 2 | 1 | 1 | 2 | 8   | 0 | 1 |
| 1 | 1 | 1 | 2 | 4   | 0 | 0 |
| 3 | 1 | 1 | 1 | 0   | 0 | 0 |
| 1 | 1 | 1 | 2 | 3   | 0 | 0 |
| 3 | 1 | 1 | 2 | 7   | 0 | 0 |

|   |   |   |   |     |   |   |
|---|---|---|---|-----|---|---|
| 1 | 1 | 1 | 2 | 4   | 0 | 0 |
| 3 | 1 | 1 | 2 | 14  | 0 | 1 |
| 3 | 1 | 1 | 2 | 2   | 0 | 0 |
| 1 | 1 | 1 | 2 | 4   | 0 | 0 |
| 3 | 1 | 1 | 2 | 4   | 0 | 0 |
| 1 | 1 | 1 | 2 | 3   | 0 | 0 |
| 3 | 1 | 1 | 2 | 7   | 0 | 0 |
| 1 | 1 | 1 | 2 | 4   | 0 | 0 |
| 1 | 1 | 2 | 2 | 2   | 0 | 0 |
| 3 | 1 | 1 | 1 | 13  | 0 | 1 |
| 3 | 1 | 1 | 2 | 23  | 0 | 1 |
| 1 | 1 | 1 | 2 | 3   | 0 | 0 |
| 3 | 1 | 1 | 2 | 1   | 0 | 0 |
| 3 | 1 | 1 | 2 | 2   | 0 | 0 |
| 2 | 1 | 1 | 2 | 2   | 0 | 0 |
| 3 | 1 | 1 | 1 | 3   | 0 | 0 |
| 3 | 1 | 1 | 2 | 10  | 0 | 1 |
| 1 | 2 | 1 | 3 | 37  | 0 | 1 |
| 1 | 1 | 1 | 2 | 10  | 0 | 1 |
| 3 | 1 | 1 | 2 | 3   | 0 | 0 |
| 3 | 1 | 1 | 2 | 28  | 0 | 1 |
| 1 | 1 | 1 | 2 | 5   | 0 | 0 |
| 1 | 2 | 1 | 3 | 4   | 0 | 0 |
| 3 | 1 | 1 | 1 | 2   | 0 | 0 |
| 3 | 1 | 1 | 2 | 105 | 0 | 1 |
| 2 | 1 | 1 | 1 | 1   | 0 | 0 |
| 1 | 1 | 1 | 2 | 5   | 0 | 0 |
| 3 | 1 | 1 | 1 | 4   | 0 | 0 |
| 3 | 1 | 1 | 2 | 0   | 0 | 0 |
| 1 | 1 | 1 | 1 | 2   | 0 | 0 |
| 1 | 2 |   |   |     | 1 |   |
| 1 | 1 | 1 | 2 | 3   | 0 | 0 |
| 1 | 1 | 1 | 2 | 4   | 0 | 0 |
| 3 | 1 | 1 | 2 | 6   | 0 | 0 |
| 1 | 1 | 1 | 2 | 6   | 0 | 0 |
| 3 | 1 | 1 | 2 | 47  | 0 | 1 |
| 1 | 1 | 1 | 2 | 2   | 0 | 0 |
| 3 | 1 | 1 | 2 | 1   | 0 | 0 |
| 3 | 1 | 1 | 2 | 1   | 0 | 0 |
| 2 | 1 | 1 | 2 | 35  | 0 | 1 |
| 2 | 1 | 1 | 2 | 0   | 0 | 0 |
| 3 | 1 | 1 | 1 | 2   | 0 | 0 |
| 3 | 1 | 2 | 2 | 15  | 0 | 1 |
| 3 | 1 | 1 | 2 | 5   | 0 | 0 |
| 3 | 1 | 1 | 2 | 6   | 0 | 0 |
| 2 | 1 | 1 | 2 | 0   | 0 | 0 |
| 3 | 1 | 1 | 2 | 4   | 0 | 0 |
| 3 | 1 | 1 | 2 | 2   | 0 | 0 |
| 2 | 1 | 1 | 2 | 2   | 0 | 0 |
| 1 | 1 | 1 | 2 | 0   | 0 | 0 |
| 3 | 1 | 1 | 1 | 2   | 0 | 0 |
| 2 | 1 | 1 | 2 | 5   | 0 | 0 |
| 1 | 1 | 1 | 2 | 1   | 0 | 0 |
| 1 | 1 | 1 | 1 | 3   | 0 | 0 |

|   |   |   |   |     |   |   |
|---|---|---|---|-----|---|---|
| 1 | 2 | 1 | 3 | 1   | 0 | 0 |
| 3 | 1 | 1 | 1 | 95  | 0 | 1 |
| 3 | 1 | 1 | 1 | 3   | 0 | 0 |
| 3 | 1 | 1 | 2 | 1   | 0 | 0 |
| 3 | 1 | 1 | 2 | 3   | 0 | 0 |
| 3 | 1 | 1 | 2 | 1   | 0 | 0 |
| 1 | 1 | 1 | 2 | 1   | 0 | 0 |
| 3 | 1 | 2 | 2 | 101 | 0 | 1 |
| 2 | 1 | 1 | 2 | 1   | 0 | 0 |
| 3 | 1 | 1 | 2 | 34  | 0 | 1 |
| 3 | 1 | 1 | 2 | 3   | 0 | 0 |
| 3 | 1 | 1 | 2 | 3   | 0 | 0 |
| 3 | 1 | 2 | 2 | 7   | 0 | 0 |
| 2 | 1 | 2 | 2 | 0   | 0 | 0 |
| 3 | 1 | 1 | 1 | 1   | 0 | 0 |
| 1 | 2 | 1 | 3 | 204 | 1 |   |
| 2 | 1 | 2 | 2 | 0   | 0 | 0 |
| 3 | 2 | 1 | 3 | 34  | 0 | 1 |
| 2 | 1 | 1 | 2 | 4   | 0 | 0 |
| 1 | 1 | 2 | 2 | 4   | 0 | 0 |
| 3 | 1 | 1 | 2 | 2   | 0 | 0 |
| 3 | 1 | 1 | 2 | 1   | 0 | 0 |
| 2 | 1 | 1 | 1 | 3   | 0 | 0 |
| 1 | 1 | 1 | 2 | 0   | 0 | 0 |
| 3 | 1 | 1 | 2 | 8   | 0 | 1 |
| 1 | 1 | 1 | 2 | 2   | 0 | 0 |
| 1 | 2 | 1 | 3 | 60  | 0 | 1 |
| 2 | 1 | 2 | 2 | 2   | 0 | 0 |
| 1 | 1 | 1 | 1 | 1   | 0 | 0 |
| 3 | 1 | 1 | 2 | 36  | 0 | 1 |
| 1 | 2 | 1 | 3 | 2   | 0 | 0 |
| 1 | 1 | 2 | 1 | 1   | 0 | 0 |
| 3 | 1 | 1 | 2 | 3   | 0 | 0 |
| 3 | 1 | 1 | 2 | 2   | 0 | 0 |
| 2 | 1 | 1 | 2 | 72  | 0 | 1 |
| 1 | 2 | 1 | 3 | 350 | 1 |   |
| 1 | 1 | 1 | 1 | 17  | 0 | 1 |
| 3 | 1 | 2 | 1 | 238 | 1 |   |
| 1 | 1 | 2 | 1 | 55  | 0 | 1 |
| 1 | 1 | 1 | 2 | 2   | 0 | 0 |
| 1 | 1 | 1 | 1 | 15  | 0 | 1 |
| 1 | 1 | 1 | 1 | 1   | 0 | 0 |
| 1 | 1 | 1 | 2 | 19  | 0 | 1 |
| 1 | 1 | 1 | 2 | 3   | 0 | 0 |
| 1 | 1 | 1 | 2 | 2   | 0 | 0 |
| 1 | 1 | 2 | 1 | 2   | 0 | 0 |
| 1 | 1 | 1 | 2 | 1   | 0 | 0 |
| 1 | 1 | 1 | 2 | 3   | 0 | 0 |
| 3 | 1 | 1 | 1 | 2   | 0 | 0 |
| 1 | 1 | 1 | 2 | 124 | 0 | 1 |
| 3 | 1 | 1 | 1 | 60  | 0 | 1 |
| 2 | 1 | 1 | 2 | 3   | 0 | 0 |
| 2 | 1 | 1 | 2 | 1   | 0 | 0 |
| 1 | 1 | 1 | 1 | 1   | 0 | 0 |

|   |   |   |   |     |   |   |
|---|---|---|---|-----|---|---|
| 3 | 1 | 1 | 2 | 26  | 0 | 1 |
| 1 | 2 | 1 | 3 | 25  | 0 | 1 |
| 1 | 2 | 1 | 3 | 24  | 0 | 1 |
| 3 | 1 | 1 | 1 | 36  | 0 | 1 |
| 3 | 1 | 1 | 1 | 3   | 0 | 0 |
| 3 | 1 | 1 | 1 | 1   | 0 | 0 |
| 3 | 1 | 1 | 1 | 0   | 0 | 0 |
| 1 | 2 | 1 | 3 | 1   | 0 | 0 |
| 3 | 1 | 1 | 2 | 49  | 0 | 1 |
| 3 | 1 | 1 | 1 | 1   | 0 | 0 |
| 1 | 1 | 1 | 2 | 4   | 0 | 0 |
| 3 | 1 | 1 | 2 | 0   | 0 | 0 |
| 1 | 1 | 2 | 2 | 2   | 0 | 0 |
| 3 | 1 | 1 | 1 | 6   | 0 | 0 |
| 1 | 2 | 1 | 3 | 4   | 0 | 0 |
| 3 | 1 | 1 | 1 | 6   | 0 | 0 |
| 3 | 1 | 1 | 2 | 3   | 0 | 0 |
| 1 | 1 | 1 | 2 | 3   | 0 | 0 |
| 1 | 1 | 1 | 2 | 3   | 0 | 0 |
| 2 | 1 | 1 | 1 | 3   | 0 | 0 |
| 2 | 1 | 1 | 2 | 1   | 0 | 0 |
| 3 | 1 | 1 | 2 | 0   | 0 | 0 |
| 2 | 1 | 1 | 2 | 1   | 0 | 0 |
| 2 | 1 | 1 | 1 | 1   | 0 | 0 |
| 2 | 1 | 1 | 2 | 0   | 0 | 0 |
| 3 | 1 | 1 | 2 | 7   | 0 | 0 |
| 3 | 1 | 1 | 1 | 1   | 0 | 0 |
| 1 | 1 | 1 | 1 | 4   | 0 | 0 |
| 3 | 2 | 2 | 3 | 7   | 0 | 0 |
| 1 | 1 | 1 | 2 | 3   | 0 | 0 |
| 1 | 1 | 2 | 1 | 2   | 0 | 0 |
| 1 | 1 | 1 | 2 | 2   | 0 | 0 |
| 3 | 1 | 1 | 2 | 4   | 0 | 0 |
| 3 | 1 | 2 | 2 | 2   | 0 | 0 |
| 1 | 1 | 1 | 2 | 3   | 0 | 0 |
| 1 | 1 | 1 | 2 | 3   | 0 | 0 |
| 2 | 1 | 1 | 2 | 4   | 0 | 0 |
| 3 | 1 | 1 | 2 | 27  | 0 | 1 |
| 3 | 1 | 2 | 1 | 1   | 0 | 0 |
| 3 | 1 | 1 | 1 | 40  | 0 | 1 |
| 3 | 1 | 1 | 2 | 36  | 0 | 1 |
| 1 | 2 | 1 | 3 | 23  | 0 | 1 |
| 3 | 1 | 1 | 2 | 6   | 0 | 0 |
| 2 | 1 | 1 | 2 | 2   | 0 | 0 |
| 3 | 1 | 1 | 1 | 1   | 0 | 0 |
| 2 | 1 | 1 | 2 | 12  | 0 | 1 |
| 1 | 1 | 1 | 2 | 4   | 0 | 0 |
| 1 | 1 | 2 | 2 | 161 | 0 | 1 |
| 2 | 1 | 1 | 2 | 1   | 0 | 0 |
| 1 | 1 | 1 | 2 | 4   | 0 | 0 |
| 1 | 2 |   |   |     | 1 |   |
| 3 | 1 | 1 | 2 | 0   | 0 | 0 |
| 2 | 2 | 2 | 3 | 3   | 0 | 0 |
| 1 | 1 | 1 | 2 | 8   | 0 | 1 |



|   |   |   |   |    |   |   |
|---|---|---|---|----|---|---|
| 3 | 1 | 1 | 2 | 56 | 0 | 1 |
| 1 | 1 | 1 | 1 | 2  | 0 | 0 |
| 3 | 1 | 1 | 2 | 3  | 0 | 0 |
| 1 | 1 | 1 | 2 | 35 | 0 | 1 |
| 3 | 1 | 1 | 2 | 1  | 0 | 0 |
| 3 | 1 | 2 | 2 | 3  | 0 | 0 |
| 1 | 1 | 1 | 1 | 3  | 0 | 0 |
| 1 | 2 | 1 | 3 | 12 | 0 | 1 |
| 1 | 1 | 1 | 2 | 4  | 0 | 0 |
| 1 | 1 | 1 | 2 | 3  | 0 | 0 |
| 1 | 2 | 1 | 3 | 7  | 0 | 0 |
| 2 | 1 | 2 | 2 | 1  | 0 | 0 |
| 3 | 1 | 1 | 1 | 2  | 0 | 0 |
| 1 | 2 | 1 | 3 | 2  | 0 | 0 |
| 2 | 1 | 1 | 2 | 0  | 0 | 0 |
| 2 | 1 | 1 | 2 | 3  | 0 | 0 |
| 1 | 1 | 1 | 2 | 3  | 0 | 0 |
| 2 | 1 | 1 | 2 | 1  | 0 | 0 |
| 1 | 1 | 1 | 2 | 2  | 0 | 0 |
| 3 | 1 | 1 | 2 | 5  | 0 | 0 |
| 1 | 1 | 1 | 2 | 28 | 0 | 1 |
| 3 | 1 | 1 | 2 | 36 | 0 | 1 |
| 1 | 1 | 1 | 2 | 38 | 0 | 1 |
| 1 | 1 | 1 | 1 | 0  | 0 | 0 |
| 3 | 1 | 1 | 1 | 42 | 0 | 1 |
| 1 | 1 | 1 | 2 | 2  | 0 | 0 |
| 3 | 1 | 1 | 2 | 3  | 0 | 0 |
| 2 | 1 | 1 | 2 | 4  | 0 | 0 |
| 2 | 1 | 2 | 2 | 3  | 0 | 0 |
| 1 | 1 | 1 | 2 | 1  | 0 | 0 |
| 2 | 1 | 1 | 2 | 3  | 0 | 0 |
| 2 | 1 | 1 | 2 | 1  | 0 | 0 |
| 2 | 1 | 1 | 2 | 1  | 0 | 0 |
| 3 | 1 | 1 | 2 | 5  | 0 | 0 |
| 2 | 1 | 1 | 2 | 2  | 0 | 0 |
| 2 | 1 | 2 | 2 | 3  | 0 | 0 |
| 2 | 1 | 2 | 1 | 2  | 0 | 0 |
| 1 | 1 | 1 | 1 | 1  | 0 | 0 |
| 2 | 1 | 1 | 2 | 0  | 0 | 0 |
| 3 | 1 | 1 | 2 | 3  | 0 | 0 |
| 2 | 1 | 1 | 2 | 1  | 0 | 0 |
| 1 | 1 | 1 | 2 | 5  | 0 | 0 |
| 3 | 1 | 1 | 2 | 16 | 0 | 1 |
| 3 | 1 | 1 | 1 | 4  | 0 | 0 |
| 3 | 1 | 1 | 2 | 1  | 0 | 0 |
| 2 | 1 | 1 | 1 | 0  | 0 | 0 |
| 3 | 1 | 1 | 2 | 14 | 0 | 1 |
| 3 | 1 | 1 | 1 | 3  | 0 | 0 |
| 3 | 1 | 1 | 2 | 0  | 0 | 0 |
| 3 | 1 | 1 | 2 | 0  | 0 | 0 |
| 3 | 1 | 1 | 2 | 2  | 0 | 0 |
| 1 | 1 | 1 | 2 | 2  | 0 | 0 |
| 3 | 1 | 1 | 1 | 0  | 0 | 0 |
| 3 | 1 | 1 | 2 | 7  | 0 | 0 |

|   |   |   |   |     |   |   |
|---|---|---|---|-----|---|---|
| 3 | 1 | 2 | 2 | 2   | 0 | 0 |
| 1 | 2 | 1 | 3 | 2   | 0 | 0 |
| 2 | 1 | 2 | 1 | 0   | 0 | 0 |
| 1 | 1 | 1 | 2 | 0   | 0 | 0 |
| 3 | 1 | 1 | 2 | 32  | 0 | 1 |
| 3 | 1 | 1 | 1 | 2   | 0 | 0 |
| 3 | 1 | 1 | 2 | 2   | 0 | 0 |
| 1 | 1 | 1 | 2 | 13  | 0 | 1 |
| 3 | 1 | 1 | 2 | 5   | 0 | 0 |
| 3 | 1 | 1 | 2 | 6   | 0 | 0 |
| 3 | 1 | 1 | 2 | 3   | 0 | 0 |
| 2 | 1 | 1 | 2 | 4   | 0 | 0 |
| 1 | 1 | 1 | 1 | 4   | 0 | 0 |
| 3 | 1 | 1 | 2 | 4   | 0 | 0 |
| 3 | 1 | 1 | 2 | 5   | 0 | 0 |
| 3 | 1 | 2 | 2 | 13  | 0 | 1 |
| 2 | 1 | 1 | 1 | 36  | 0 | 1 |
| 1 | 1 | 2 | 1 | 95  | 0 | 1 |
| 3 | 1 | 1 | 2 | 4   | 0 | 0 |
| 3 | 1 | 1 | 2 | 0   | 0 | 0 |
| 3 | 1 | 2 | 1 | 21  | 0 | 1 |
| 3 | 1 | 2 | 1 | 2   | 0 | 0 |
| 1 | 1 | 2 | 2 | 2   | 0 | 0 |
| 2 | 1 | 2 | 2 | 19  | 0 | 1 |
| 3 | 1 | 1 | 1 | 42  | 0 | 1 |
| 2 | 1 | 1 | 2 | 3   | 0 | 0 |
| 2 | 1 | 1 | 2 | 0   | 0 | 0 |
| 2 | 2 | 1 | 3 | 2   | 0 | 0 |
| 2 | 1 | 1 | 1 | 1   | 0 | 0 |
| 3 | 1 | 1 | 1 | 1   | 0 | 0 |
| 1 | 2 |   |   |     | 1 |   |
| 1 | 1 | 1 | 1 | 12  | 0 | 1 |
| 2 | 1 | 1 | 2 | 2   | 0 | 0 |
| 1 | 1 | 1 | 2 | 3   | 0 | 0 |
| 2 | 1 | 1 | 2 | 4   | 0 | 0 |
| 2 | 1 | 2 | 2 | 2   | 0 | 0 |
| 1 | 1 | 2 | 1 | 18  | 0 | 1 |
| 3 | 1 | 1 | 2 | 3   | 0 | 0 |
| 3 | 1 | 1 | 1 | 4   | 0 | 0 |
| 3 | 2 | 1 | 3 | 4   | 0 | 0 |
| 1 | 1 | 2 | 1 | 1   | 0 | 0 |
| 1 | 1 | 1 | 1 | 1   | 0 | 0 |
| 3 | 1 | 1 | 1 | 110 | 0 | 1 |
| 1 | 1 | 1 | 2 | 1   | 0 | 0 |
| 3 | 1 | 1 | 2 | 27  | 0 | 1 |
| 3 | 1 | 1 | 2 | 2   | 0 | 0 |
| 1 | 1 | 1 | 2 | 1   | 0 | 0 |
| 1 | 1 | 1 | 1 | 2   | 0 | 0 |
| 1 | 1 | 1 | 2 | 4   | 0 | 0 |
| 1 | 1 | 1 | 2 | 0   | 0 | 0 |
| 3 | 1 | 1 | 2 | 2   | 0 | 0 |
| 3 | 1 | 1 | 2 | 29  | 0 | 1 |
| 3 | 1 | 2 | 1 | 129 | 0 | 1 |
| 2 | 1 | 1 | 2 | 3   | 0 | 0 |

|   |   |   |   |     |   |   |
|---|---|---|---|-----|---|---|
| 3 | 1 | 1 | 2 | 1   | 0 | 0 |
| 2 | 1 | 1 | 2 | 0   | 0 | 0 |
| 3 | 1 | 1 | 2 | 6   | 0 | 0 |
| 3 | 1 | 2 | 1 | 1   | 0 | 0 |
| 3 | 1 | 1 | 1 | 1   | 0 | 0 |
| 1 | 1 | 2 | 2 | 1   | 0 | 0 |
| 1 | 1 | 1 | 2 | 26  | 0 | 1 |
| 1 | 1 | 1 | 1 | 1   | 0 | 0 |
| 1 | 1 | 1 | 2 | 4   | 0 | 0 |
| 1 | 1 | 1 | 2 | 1   | 0 | 0 |
| 1 | 2 |   |   |     | 1 |   |
| 3 | 2 | 1 | 3 | 3   | 0 | 0 |
| 1 | 1 | 1 | 2 | 14  | 0 | 1 |
| 1 | 1 | 1 | 1 | 12  | 0 | 1 |
| 3 | 1 | 1 | 2 | 29  | 0 | 1 |
| 3 | 1 | 1 | 2 | 6   | 0 | 0 |
| 1 | 1 | 1 | 2 | 48  | 0 | 1 |
| 3 | 1 | 1 | 2 | 201 | 1 |   |
| 1 | 1 | 1 | 2 | 5   | 0 | 0 |
| 3 | 1 | 2 | 1 | 14  | 0 | 1 |
| 3 | 1 | 1 | 1 | 3   | 0 | 0 |
| 1 | 1 | 1 | 2 | 12  | 0 | 1 |
| 1 | 1 | 1 | 1 | 2   | 0 | 0 |
| 2 | 1 | 1 | 1 | 3   | 0 | 0 |
| 1 | 1 | 1 | 2 | 0   | 0 | 0 |
| 2 | 1 | 1 | 2 | 3   | 0 | 0 |
| 2 | 1 | 1 | 2 | 1   | 0 | 0 |
| 3 | 1 | 1 | 1 | 1   | 0 | 0 |
| 1 | 1 | 1 | 2 | 1   | 0 | 0 |
| 3 | 1 | 1 | 1 | 1   | 0 | 0 |
| 3 | 1 | 1 | 2 | 1   | 0 | 0 |
| 3 | 1 | 1 | 1 | 3   | 0 | 0 |
| 2 | 1 | 1 | 1 | 6   | 0 | 0 |
| 1 | 1 | 1 | 2 | 3   | 0 | 0 |
| 2 | 1 | 2 | 1 | 0   | 0 | 0 |
| 3 | 1 | 2 | 1 | 92  | 0 | 1 |
| 1 | 1 | 1 | 1 | 2   | 0 | 0 |
| 1 | 2 |   |   |     | 1 |   |
| 3 | 1 | 1 | 2 | 27  | 0 | 1 |
| 3 | 2 | 1 | 3 | 0   | 0 | 0 |
| 3 | 1 | 1 | 1 | 5   | 0 | 0 |
| 1 | 2 | 1 | 3 | 18  | 0 | 1 |
| 2 | 1 | 2 | 2 | 3   | 0 | 0 |
| 3 | 1 | 1 | 2 | 38  | 0 | 1 |
| 1 | 1 | 1 | 1 | 2   | 0 | 0 |
| 1 | 1 | 1 | 2 | 2   | 0 | 0 |
| 1 | 1 | 1 | 2 | 7   | 0 | 0 |
| 1 | 1 | 2 | 2 | 10  | 0 | 1 |
| 1 | 1 | 1 | 2 | 7   | 0 | 0 |
| 1 | 1 | 1 | 1 | 2   | 0 | 0 |
| 1 | 1 | 2 | 1 | 1   | 0 | 0 |
| 1 | 1 | 1 | 1 | 1   | 0 | 0 |
| 1 | 1 | 1 | 2 | 4   | 0 | 0 |
| 1 | 1 | 1 | 2 | 1   | 0 | 0 |

|   |   |   |   |     |   |   |
|---|---|---|---|-----|---|---|
| 1 | 1 | 1 | 1 | 1   | 0 | 0 |
| 1 | 1 | 1 | 1 | 4   | 0 | 0 |
| 1 | 1 | 1 | 1 | 0   | 0 | 0 |
| 1 | 2 | 1 | 3 | 4   | 0 | 0 |
| 1 | 1 | 1 | 2 | 9   | 0 | 1 |
| 1 | 1 | 1 | 2 | 2   | 0 | 0 |
| 1 | 1 | 1 | 2 | 5   | 0 | 0 |
| 1 | 1 | 2 | 1 | 67  | 0 | 1 |
| 1 | 1 | 1 | 2 | 14  | 0 | 1 |
| 1 | 2 | 1 | 3 | 1   | 0 | 0 |
| 1 | 1 | 1 | 1 | 0   | 0 | 0 |
| 1 | 1 | 1 | 1 | 3   | 0 | 0 |
| 1 | 1 | 1 | 2 | 11  | 0 | 1 |
| 1 | 1 | 1 | 2 | 3   | 0 | 0 |
| 1 | 1 | 1 | 2 | 3   | 0 | 0 |
| 1 | 2 | 1 | 3 | 1   | 0 | 0 |
| 1 | 1 | 1 | 1 | 1   | 0 | 0 |
| 1 | 1 | 1 | 2 | 4   | 0 | 0 |
| 1 | 1 | 1 | 2 | 26  | 0 | 1 |
| 1 | 1 | 1 | 2 | 1   | 0 | 0 |
| 1 | 1 | 1 | 1 | 35  | 0 | 1 |
| 1 | 1 | 1 | 2 | 2   | 0 | 0 |
| 1 | 1 | 1 | 2 | 1   | 0 | 0 |
| 1 | 1 | 2 | 2 | 1   | 0 | 0 |
| 1 | 1 | 1 | 1 | 1   | 0 | 0 |
| 1 | 1 | 1 | 2 | 2   | 0 | 0 |
| 1 | 1 | 1 | 1 | 1   | 0 | 0 |
| 1 | 1 | 1 | 1 | 23  | 0 | 1 |
| 1 | 1 | 1 | 2 | 0   | 0 | 0 |
| 1 | 1 | 1 | 1 | 10  | 0 | 1 |
| 1 | 1 | 1 | 1 | 2   | 0 | 0 |
| 1 | 1 | 1 | 2 | 30  | 0 | 1 |
| 1 | 1 | 1 | 2 | 4   | 0 | 0 |
| 1 | 1 | 2 | 2 | 2   | 0 | 0 |
| 1 | 1 | 1 | 2 | 117 | 0 | 1 |
| 1 | 1 | 1 | 1 | 4   | 0 | 0 |
| 1 | 1 | 1 | 2 | 2   | 0 | 0 |
| 1 | 1 | 1 | 2 | 13  | 0 | 1 |
| 1 | 1 | 1 | 2 | 16  | 0 | 1 |
| 1 | 1 | 1 | 2 | 2   | 0 | 0 |
| 1 | 1 | 1 | 1 | 1   | 0 | 0 |
| 1 | 1 | 2 | 2 | 10  | 0 | 1 |
| 1 | 1 | 1 | 2 | 22  | 0 | 1 |
| 1 | 1 | 1 | 2 | 0   | 0 | 0 |
| 1 | 2 | 1 | 3 | 1   | 0 | 0 |
| 1 | 1 | 1 | 2 | 6   | 0 | 0 |
| 1 | 1 | 1 | 2 | 3   | 0 | 0 |
| 1 | 1 | 1 | 2 | 35  | 0 | 1 |
| 1 | 1 | 1 | 2 | 1   | 0 | 0 |
| 1 | 1 | 1 | 1 | 3   | 0 | 0 |
| 1 | 1 | 1 | 2 | 2   | 0 | 0 |
| 1 | 1 | 1 | 2 | 5   | 0 | 0 |
| 1 | 1 | 1 | 1 | 1   | 0 | 0 |
| 1 | 1 | 1 | 2 | 37  | 0 | 1 |

|   |   |   |   |     |   |   |
|---|---|---|---|-----|---|---|
| 1 | 1 | 1 | 1 | 2   | 0 | 0 |
| 1 | 1 | 1 | 1 | 1   | 0 | 0 |
| 1 | 1 | 1 | 2 | 2   | 0 | 0 |
| 1 | 1 | 1 | 2 | 1   | 0 | 0 |
| 1 | 1 | 1 | 2 | 4   | 0 | 0 |
| 1 | 1 | 1 | 2 | 153 | 0 | 1 |
| 1 | 1 | 1 | 2 | 2   | 0 | 0 |
| 1 | 1 | 1 | 1 | 2   | 0 | 0 |
| 1 | 1 | 1 | 1 | 3   | 0 | 0 |
| 1 | 1 | 1 | 2 | 6   | 0 | 0 |
| 1 | 1 | 2 | 2 | 1   | 0 | 0 |
| 1 | 1 | 1 | 2 | 1   | 0 | 0 |
| 1 | 1 | 1 | 2 | 2   | 0 | 0 |
| 1 | 1 | 1 | 1 | 1   | 0 | 0 |
| 1 | 1 | 1 | 1 | 3   | 0 | 0 |
| 1 | 1 | 1 | 2 | 4   | 0 | 0 |
| 1 | 1 | 1 | 2 | 2   | 0 | 0 |
| 1 | 1 | 2 | 2 | 2   | 0 | 0 |
| 1 | 1 | 2 | 1 | 0   | 0 | 0 |
| 1 | 1 | 1 | 2 | 2   | 0 | 0 |
| 1 | 1 | 1 | 2 | 21  | 0 | 1 |
| 1 | 1 | 1 | 1 | 4   | 0 | 0 |
| 1 | 1 | 2 | 1 | 1   | 0 | 0 |
| 1 | 1 | 1 | 2 | 0   | 0 | 0 |
| 1 | 1 | 1 | 2 | 2   | 0 | 0 |
| 1 | 1 | 1 | 2 | 4   | 0 | 0 |
| 1 | 1 | 1 | 1 | 1   | 0 | 0 |
| 1 | 1 | 2 | 2 | 6   | 0 | 0 |
| 1 | 1 | 1 | 1 | 3   | 0 | 0 |
| 1 | 1 | 1 | 1 | 1   | 0 | 0 |
| 1 | 1 | 1 | 2 | 5   | 0 | 0 |
| 1 | 1 | 2 | 1 | 0   | 0 | 0 |
| 1 | 2 | 1 | 3 | 0   | 0 | 0 |
| 1 | 1 | 1 | 1 | 0   | 0 | 0 |
| 1 | 1 | 1 | 2 | 2   | 0 | 0 |
| 1 | 2 | 1 | 3 | 1   | 0 | 0 |
| 1 | 1 | 1 | 2 | 1   | 0 | 0 |
| 1 | 1 | 1 | 2 | 2   | 0 | 0 |
| 1 | 1 | 1 | 2 | 2   | 0 | 0 |
| 1 | 1 | 1 | 2 | 5   | 0 | 0 |
| 1 | 1 | 2 | 2 | 0   | 0 | 0 |
| 1 | 1 | 1 | 2 | 1   | 0 | 0 |
| 1 | 1 | 1 | 2 | 2   | 0 | 0 |
| 1 | 1 | 1 | 2 | 13  | 0 | 1 |
| 1 | 1 | 2 | 2 | 2   | 0 | 0 |
| 1 | 1 | 1 | 2 | 7   | 0 | 0 |
| 1 | 1 | 1 | 1 | 15  | 0 | 1 |
| 1 | 1 | 1 | 2 | 6   | 0 | 0 |
| 1 | 1 | 1 | 2 | 2   | 0 | 0 |
| 1 | 1 | 1 | 1 | 1   | 0 | 0 |
| 1 | 1 | 1 | 2 | 2   | 0 | 0 |
| 1 | 1 | 1 | 2 | 3   | 0 | 0 |
| 1 | 1 | 1 | 2 | 3   | 0 | 0 |
| 1 | 1 | 1 | 2 | 2   | 0 | 0 |

|   |   |   |   |     |   |   |
|---|---|---|---|-----|---|---|
| 1 | 1 | 1 | 2 | 7   | 0 | 0 |
| 1 | 1 | 2 | 1 | 192 | 1 |   |
| 1 | 1 | 1 | 2 | 2   | 0 | 0 |
| 1 | 1 | 1 | 2 | 10  | 0 | 1 |
| 1 | 1 | 1 | 1 | 29  | 0 | 1 |
| 1 | 1 | 1 | 2 | 0   | 0 | 0 |
| 1 | 1 | 2 | 1 | 94  | 0 | 1 |
| 1 | 1 | 1 | 2 | 0   | 0 | 0 |
| 1 | 1 | 1 | 2 | 0   | 0 | 0 |
| 1 | 1 | 1 | 1 | 0   | 0 | 0 |
| 1 | 1 | 1 | 2 | 2   | 0 | 0 |
| 1 | 1 | 1 | 2 | 0   | 0 | 0 |
| 1 | 1 | 1 | 2 | 0   | 0 | 0 |
| 1 | 1 | 1 | 2 | 0   | 0 | 0 |
| 1 | 1 | 1 | 2 | 0   | 0 | 0 |
| 1 | 1 | 1 | 2 | 4   | 0 | 0 |
| 1 | 1 | 1 | 2 | 4   | 0 | 0 |
| 1 | 1 | 1 | 2 | 2   | 0 | 0 |
| 1 | 1 | 1 | 2 | 2   | 0 | 0 |
| 1 | 1 | 2 | 2 | 44  | 0 | 1 |
| 1 | 1 | 1 | 1 | 3   | 0 | 0 |
| 1 | 1 | 1 | 2 | 0   | 0 | 0 |
| 1 | 1 | 1 | 2 | 0   | 0 | 0 |
| 1 | 1 | 1 | 2 | 0   | 0 | 0 |
| 1 | 1 | 2 | 2 | 0   | 0 | 0 |
| 1 | 1 | 1 | 2 | 4   | 0 | 0 |
| 1 | 1 | 1 | 1 | 2   | 0 | 0 |
| 1 | 1 | 1 | 2 | 2   | 0 | 0 |
| 1 | 1 | 1 | 2 | 4   | 0 | 0 |
| 1 | 1 | 1 | 2 | 1   | 0 | 0 |
| 1 | 1 | 2 | 2 | 2   | 0 | 0 |
| 1 | 1 | 1 | 2 | 0   | 0 | 0 |
| 1 | 2 | 1 | 2 | 32  | 0 | 1 |
| 1 | 1 | 1 | 2 | 47  | 0 | 1 |
| 1 | 1 | 1 | 2 | 33  | 0 | 1 |
| 3 | 1 | 1 | 2 | 32  | 0 | 1 |
| 3 | 1 | 2 | 2 | 179 | 0 | 1 |
| 1 | 1 | 1 | 2 | 33  | 0 | 1 |
| 1 | 1 | 1 | 1 | 3   | 0 | 0 |
| 1 | 1 | 1 | 1 | 19  | 0 | 1 |
| 3 | 1 | 1 | 2 | 0   | 0 | 0 |
| 1 | 1 | 1 | 2 | 3   | 0 | 0 |
| 3 | 1 | 1 | 1 | 64  | 0 | 1 |
| 1 | 1 |   |   |     | 1 |   |
| 3 | 2 |   |   |     | 1 |   |
| 3 | 2 |   |   |     | 1 |   |
| 3 | 1 |   |   |     | 1 |   |
| 3 | 1 |   |   |     | 1 |   |
| 1 | 1 | 1 | 2 | 1   | 0 | 0 |
| 1 | 1 | 1 | 2 | 1   | 0 | 0 |
| 1 | 1 | 1 | 2 | 32  | 0 | 1 |
| 1 | 1 | 1 | 2 | 45  | 0 | 1 |
| 3 | 1 | 1 | 1 | 36  | 0 | 1 |
| 2 | 1 | 1 | 2 | 3   | 0 | 0 |
| 1 | 1 | 1 | 2 | 22  | 0 | 1 |

|   |   |   |   |    |   |   |
|---|---|---|---|----|---|---|
| 1 | 1 | 1 | 1 | 2  | 0 | 0 |
| 1 | 1 |   |   |    | 1 |   |
| 3 | 1 | 1 | 2 | 0  | 0 | 0 |
| 1 | 1 | 1 | 2 | 2  | 0 | 0 |
| 2 | 1 | 2 | 1 | 17 | 0 | 1 |
| 1 | 1 | 1 | 1 | 0  | 0 | 0 |
| 1 | 1 | 1 | 1 | 0  | 0 | 0 |
| 1 | 1 | 1 | 2 | 3  | 0 | 0 |
| 1 | 1 |   |   |    | 1 |   |
| 2 | 1 | 1 | 2 | 0  | 0 | 0 |
| 1 | 1 | 1 | 2 | 0  | 0 | 0 |
| 1 | 1 | 1 | 2 | 1  | 0 | 0 |
| 1 | 1 |   |   |    | 1 |   |
| 1 | 2 | 1 | 3 | 14 | 0 | 1 |
| 1 | 2 |   |   |    | 1 |   |
| 1 | 1 | 1 | 2 | 15 | 0 | 1 |
| 2 | 1 |   |   |    | 1 |   |
| 2 | 1 |   |   |    | 1 |   |
| 1 | 1 | 1 | 2 | 2  | 0 | 0 |
| 1 | 1 |   |   |    | 1 |   |
| 1 | 2 |   |   |    | 1 |   |
| 2 | 1 | 1 | 2 | 0  | 0 | 0 |
| 3 | 1 |   |   |    | 1 |   |
| 1 | 1 | 1 | 2 | 4  | 0 | 0 |
| 3 | 1 |   |   |    | 1 |   |
| 1 | 1 | 1 | 1 | 15 | 0 | 1 |
| 1 | 1 | 1 | 2 | 38 | 0 | 1 |
| 1 | 1 | 1 | 1 | 0  | 0 | 0 |
| 1 | 1 | 1 | 1 | 0  | 0 | 0 |
| 2 | 1 | 1 | 2 | 24 | 0 | 1 |
| 3 | 1 | 1 | 2 | 2  | 0 | 0 |
| 2 | 1 | 1 | 2 | 0  | 0 | 0 |
| 1 | 1 | 1 | 2 | 0  | 0 | 0 |
| 2 | 1 | 1 | 2 | 5  | 0 | 0 |
| 3 | 1 |   |   |    | 1 |   |
| 1 | 1 | 1 | 1 | 18 | 0 | 1 |
| 3 | 1 | 1 | 2 | 2  | 0 | 0 |
| 1 | 1 | 1 | 2 | 5  | 0 | 0 |
| 2 | 1 |   |   |    | 1 |   |
| 3 | 1 |   |   |    | 1 |   |
| 3 | 1 | 1 | 1 | 0  | 0 | 0 |
| 3 | 1 | 1 | 1 | 54 | 0 | 1 |
| 1 | 1 | 1 | 1 | 1  | 0 | 0 |
| 1 | 1 |   |   |    | 1 |   |
| 2 | 1 |   |   |    | 1 |   |
| 1 | 1 | 1 | 2 | 32 | 0 | 1 |
| 1 | 1 | 1 | 1 | 27 | 0 | 1 |
| 1 | 1 | 1 | 2 | 14 | 0 | 1 |
| 1 | 1 | 1 | 1 | 0  | 0 | 0 |
| 1 | 1 | 1 | 1 | 0  | 0 | 0 |
| 3 | 1 | 1 | 1 | 3  | 0 | 0 |
| 3 | 1 |   |   |    | 1 |   |
| 1 | 1 | 1 | 2 | 1  | 0 | 0 |
| 1 | 1 | 1 | 2 | 35 | 0 | 1 |

|   |   |   |   |     |   |   |
|---|---|---|---|-----|---|---|
| 2 | 1 |   |   |     | 1 |   |
| 1 | 1 |   |   |     | 1 |   |
| 1 | 1 | 1 | 2 | 7   | 0 | 0 |
| 1 | 1 | 1 | 2 | 71  | 0 | 1 |
| 1 | 1 | 1 | 2 | 86  | 0 | 1 |
| 3 | 1 | 1 | 2 | 1   | 0 | 0 |
| 1 | 1 | 1 | 2 | 99  | 0 | 1 |
| 3 | 1 | 1 | 1 | 0   | 0 | 0 |
| 3 | 1 | 2 | 1 | 5   | 0 | 0 |
| 3 | 1 |   |   |     | 1 |   |
| 3 | 1 | 1 | 1 | 6   | 0 | 0 |
| 1 | 1 | 1 | 2 | 2   | 0 | 0 |
| 1 | 1 | 1 | 1 | 5   | 0 | 0 |
| 3 | 1 | 1 | 2 | 0   | 0 | 0 |
| 2 | 1 |   |   |     | 1 |   |
| 1 | 1 |   |   |     | 1 |   |
| 1 | 1 | 1 | 2 | 2   | 0 | 0 |
| 1 | 1 | 1 | 1 | 32  | 0 | 1 |
| 1 | 1 | 1 | 1 | 32  | 0 | 1 |
| 1 | 1 | 1 | 2 | 30  | 0 | 1 |
| 1 | 1 | 1 | 2 | 16  | 0 | 1 |
| 1 | 1 | 1 | 2 | 0   | 0 | 0 |
| 3 | 1 | 1 | 1 | 87  | 0 | 1 |
| 1 | 1 | 1 | 2 | 12  | 0 | 1 |
| 1 | 1 | 1 | 1 | 1   | 0 | 0 |
| 1 | 2 | 1 | 3 | 1   | 0 | 0 |
| 1 | 1 | 1 | 2 | 1   | 0 | 0 |
| 2 | 1 |   |   |     | 1 |   |
| 1 | 1 | 1 | 1 | 0   | 0 | 0 |
| 3 | 1 | 1 | 1 | 0   | 0 | 0 |
| 2 | 1 |   |   |     | 1 |   |
| 1 | 1 |   |   |     | 1 |   |
| 3 | 1 |   |   |     | 1 |   |
| 1 | 2 |   |   |     | 1 |   |
| 2 | 2 |   |   |     | 1 |   |
| 1 | 1 |   |   |     | 1 |   |
| 1 | 1 | 1 | 2 | 5   | 0 | 0 |
| 1 | 1 | 1 | 2 | 17  | 0 | 1 |
| 2 | 2 |   |   |     | 1 |   |
| 2 | 1 | 1 | 2 | 237 | 1 |   |
| 1 | 1 | 1 | 1 | 4   | 0 | 0 |
| 1 | 1 |   |   |     | 1 |   |
| 3 | 1 | 2 | 1 | 2   | 0 | 0 |
| 1 | 1 | 1 | 2 | 1   | 0 | 0 |
| 2 | 2 | 1 | 3 | 9   | 0 | 1 |
| 2 | 1 |   |   |     | 1 |   |
| 3 | 1 |   |   |     | 1 |   |
| 1 | 2 |   |   |     | 1 |   |
| 2 | 2 |   |   |     | 1 |   |
| 1 | 1 |   |   |     | 1 |   |
| 1 | 1 | 1 | 2 | 3   | 0 | 0 |
| 1 | 1 | 1 | 2 | 2   | 0 | 0 |
| 1 | 1 |   |   |     | 1 |   |
| 1 | 1 | 1 | 2 | 1   | 0 | 0 |





|   |   |   |   |     |   |   |
|---|---|---|---|-----|---|---|
| 1 | 1 | 1 | 2 | 1   | 0 | 0 |
| 1 | 1 | 1 | 2 | 0   | 0 | 0 |
| 1 | 1 | 1 | 1 | 0   | 0 | 0 |
| 1 | 1 | 1 | 1 | 0   | 0 | 0 |
| 1 | 2 | 1 | 3 | 0   | 0 | 0 |
| 1 | 2 | 1 | 3 | 0   | 0 | 0 |
| 1 | 1 | 1 | 2 | 2   | 0 | 0 |
| 1 | 1 | 1 | 2 | 0   | 0 | 0 |
| 1 | 1 | 1 | 2 | 0   | 0 | 0 |
| 1 | 1 | 1 | 2 | 0   | 0 | 0 |
| 1 | 1 | 1 | 2 | 0   | 0 | 0 |
| 1 | 1 | 1 | 2 | 0   | 0 | 0 |
| 1 | 1 | 1 | 2 | 0   | 0 | 0 |
| 1 | 2 | 1 | 3 | 1   | 0 | 0 |
| 1 | 1 | 1 | 2 | 0   | 0 | 0 |
| 1 | 1 | 1 | 2 | 0   | 0 | 0 |
| 1 | 1 | 1 | 2 | 1   | 0 | 0 |
| 1 | 1 | 1 | 2 | 0   | 0 | 0 |
| 1 | 1 | 1 | 2 | 0   | 0 | 0 |
| 1 | 1 | 1 | 2 | 1   | 0 | 0 |
| 1 | 1 | 1 | 1 | 3   | 0 | 0 |
| 1 | 1 | 1 | 2 | 0   | 0 | 0 |
| 1 | 1 | 1 | 2 | 0   | 0 | 0 |
| 1 | 1 | 1 | 1 | 0   | 0 | 0 |
| 1 | 1 | 1 | 2 | 0   | 0 | 0 |
| 1 | 1 | 2 | 1 | 0   | 0 | 0 |
| 1 | 1 | 1 | 2 | 1   | 0 | 0 |
| 1 | 1 | 1 | 1 | 29  | 0 | 1 |
| 1 | 1 | 1 | 2 | 1   | 0 | 0 |
| 1 | 1 | 1 | 2 | 0   | 0 | 0 |
| 1 | 1 | 1 | 2 | 1   | 0 | 0 |
| 1 | 1 | 1 | 2 | 0   | 0 | 0 |
| 1 | 1 | 1 | 2 | 0   | 0 | 0 |
| 1 | 1 | 1 | 2 | 6   | 0 | 0 |
| 1 | 1 | 1 | 2 | 354 | 1 |   |
| 1 | 1 | 1 | 2 | 25  | 0 | 1 |
| 3 | 1 | 1 | 2 | 2   | 0 | 0 |
| 3 | 1 | 1 | 1 | 0   | 0 | 0 |
| 3 | 1 | 1 | 2 | 2   | 0 | 0 |
| 3 | 1 | 1 | 2 | 0   | 0 | 0 |
| 3 | 1 | 1 | 2 | 2   | 0 | 0 |
| 3 | 1 | 1 | 2 | 4   | 0 | 0 |
| 3 | 1 | 1 | 2 | 4   | 0 | 0 |
| 3 | 1 | 1 | 2 | 3   | 0 | 0 |
| 3 | 1 | 1 | 2 | 3   | 0 | 0 |
| 3 | 1 | 1 | 2 | 3   | 0 | 0 |
| 3 | 1 | 1 | 1 | 2   | 0 | 0 |
| 3 | 1 | 1 | 2 | 4   | 0 | 0 |
| 3 | 1 | 1 | 2 | 3   | 0 | 0 |
| 3 | 1 | 1 | 1 | 0   | 0 | 0 |
| 3 | 1 | 1 | 2 | 0   | 0 | 0 |
| 3 | 1 | 1 | 2 | 3   | 0 | 0 |
| 1 | 1 |   |   |     | 1 |   |
| 3 | 1 | 1 | 2 | 1   | 0 | 0 |
| 3 | 1 | 1 | 2 | 3   | 0 | 0 |
| 3 | 1 | 1 | 2 | 43  | 0 | 1 |

|   |   |   |   |     |   |   |
|---|---|---|---|-----|---|---|
| 3 | 1 | 1 | 1 | 3   | 0 | 0 |
| 3 | 1 | 1 | 2 | 0   | 0 | 0 |
| 3 | 1 | 1 | 2 | 3   | 0 | 0 |
| 2 | 1 | 1 | 2 | 17  | 0 | 1 |
| 3 | 1 | 1 | 2 | 2   | 0 | 0 |
| 3 | 1 | 1 | 2 | 13  | 0 | 1 |
| 1 | 1 | 1 | 2 | 19  | 0 | 1 |
| 3 | 1 | 1 | 1 | 3   | 0 | 0 |
| 3 | 1 | 1 | 2 | 3   | 0 | 0 |
| 1 | 1 |   |   |     | 1 |   |
| 1 | 1 | 1 | 2 | 17  | 0 | 1 |
| 3 | 1 | 2 | 1 | 340 | 1 |   |
| 3 | 1 | 1 | 2 | 1   | 0 | 0 |
| 1 | 1 |   |   |     | 1 |   |
| 3 | 1 | 1 | 2 | 2   | 0 | 0 |
| 3 | 1 | 1 | 2 | 2   | 0 | 0 |
| 3 | 1 | 1 | 2 | 1   | 0 | 0 |
| 3 | 1 | 1 | 1 | 49  | 0 | 1 |
| 3 | 1 | 1 | 1 | 4   | 0 | 0 |
| 3 | 1 | 1 | 1 | 3   | 0 | 0 |
| 3 | 1 | 1 | 2 | 3   | 0 | 0 |
| 2 | 1 | 1 | 2 | 3   | 0 | 0 |
| 3 | 1 | 1 | 2 | 4   | 0 | 0 |
| 1 | 1 | 1 | 1 | 0   | 0 | 0 |
| 3 | 1 | 1 | 1 | 1   | 0 | 0 |
| 3 | 1 | 1 | 2 | 2   | 0 | 0 |
| 1 | 1 | 1 | 1 | 3   | 0 | 0 |
| 1 | 1 | 1 | 2 | 3   | 0 | 0 |
| 3 | 1 | 1 | 2 | 3   | 0 | 0 |
| 2 | 1 | 1 | 2 | 2   | 0 | 0 |
| 1 | 1 |   |   |     | 1 |   |
| 3 | 1 | 1 | 2 | 4   | 0 | 0 |
| 3 | 1 | 2 | 2 | 2   | 0 | 0 |
| 3 | 1 | 1 | 1 | 2   | 0 | 0 |
| 3 | 1 | 1 | 1 | 3   | 0 | 0 |
| 3 | 1 | 1 | 1 | 3   | 0 | 0 |
| 3 | 1 | 1 | 2 | 21  | 0 | 1 |
| 3 | 1 | 1 | 2 | 4   | 0 | 0 |
| 1 | 2 |   |   |     | 1 |   |
| 3 | 1 | 1 | 2 | 0   | 0 | 0 |
| 3 | 1 | 1 | 2 | 3   | 0 | 0 |
| 3 | 1 | 1 | 1 | 3   | 0 | 0 |
| 3 | 1 | 1 | 2 | 0   | 0 | 0 |
| 3 | 1 | 1 | 2 | 2   | 0 | 0 |
| 3 | 1 | 1 | 2 | 0   | 0 | 0 |
| 3 | 1 | 1 | 2 | 6   | 0 | 0 |
| 3 | 1 | 1 | 1 | 4   | 0 | 0 |
| 3 | 1 | 1 | 2 | 0   | 0 | 0 |
| 3 | 1 | 1 | 2 | 86  | 0 | 1 |
| 3 | 1 | 1 | 1 | 1   | 0 | 0 |
| 3 | 1 | 1 | 2 | 3   | 0 | 0 |
| 3 | 1 | 1 | 2 | 0   | 0 | 0 |
| 3 | 1 |   |   |     | 1 |   |
| 3 | 1 | 1 | 1 | 3   | 0 | 0 |

|   |   |   |   |    |   |   |
|---|---|---|---|----|---|---|
| 3 | 1 | 1 | 1 | 3  | 0 | 0 |
| 3 | 1 | 1 | 2 | 2  | 0 | 0 |
| 3 | 1 | 1 | 2 | 0  | 0 | 0 |
| 3 | 1 |   |   |    | 1 |   |
| 3 | 1 | 1 | 2 | 58 | 0 | 1 |
| 3 | 1 | 1 | 2 | 2  | 0 | 0 |
| 1 | 1 | 1 | 2 | 1  | 0 | 0 |
| 3 | 1 | 1 | 1 | 1  | 0 | 0 |
| 3 | 1 | 2 | 1 | 2  | 0 | 0 |
| 3 | 1 | 1 | 1 | 1  | 0 | 0 |
| 3 | 1 | 1 | 1 | 3  | 0 | 0 |
| 3 | 1 | 1 | 2 | 1  | 0 | 0 |
| 1 | 1 | 1 | 2 | 1  | 0 | 0 |
| 3 | 2 |   |   |    | 1 |   |
| 3 | 1 | 1 | 1 | 1  | 0 | 0 |
| 3 | 1 | 1 | 2 | 2  | 0 | 0 |
| 3 | 1 | 1 | 2 | 2  | 0 | 0 |
| 3 | 1 | 1 | 2 | 8  | 0 | 1 |
| 3 | 1 | 1 | 1 | 1  | 0 | 0 |
| 1 | 1 | 1 | 2 | 0  | 0 | 0 |
| 3 | 1 | 1 | 2 | 17 | 0 | 1 |
| 3 | 1 | 1 | 1 | 0  | 0 | 0 |
| 3 | 1 | 1 | 1 | 1  | 0 | 0 |
| 1 | 1 | 1 | 2 | 5  | 0 | 0 |
| 3 | 1 | 1 | 2 | 1  | 0 | 0 |
| 3 | 1 | 1 | 2 | 6  | 0 | 0 |
| 1 | 2 | 1 | 3 | 2  | 0 | 0 |
| 3 | 1 | 1 | 2 | 2  | 0 | 0 |
| 3 | 1 | 1 | 1 | 1  | 0 | 0 |
| 3 | 1 | 1 | 2 | 4  | 0 | 0 |
| 3 | 1 | 1 | 2 | 7  | 0 | 0 |
| 1 | 1 | 1 | 1 | 2  | 0 | 0 |
| 3 | 1 | 1 | 2 | 2  | 0 | 0 |
| 1 | 1 | 1 | 1 | 3  | 0 | 0 |
| 2 | 1 | 1 | 2 | 3  | 0 | 0 |
| 3 | 1 | 1 | 2 | 7  | 0 | 0 |
| 3 | 1 | 1 | 2 | 0  | 0 | 0 |
| 3 | 1 | 1 | 2 | 66 | 0 | 1 |
| 3 | 1 | 1 | 1 | 0  | 0 | 0 |
| 3 | 1 | 1 | 1 | 3  | 0 | 0 |
| 3 | 1 | 1 | 2 | 2  | 0 | 0 |
| 3 | 1 | 1 | 1 | 0  | 0 | 0 |
| 3 | 1 | 1 | 1 | 3  | 0 | 0 |
| 1 | 1 |   |   |    | 1 |   |
| 3 | 1 | 1 | 1 | 2  | 0 | 0 |
| 2 | 1 | 1 | 2 | 6  | 0 | 0 |
| 2 | 1 | 1 | 2 | 0  | 0 | 0 |
| 3 | 1 | 1 | 2 | 3  | 0 | 0 |
| 2 | 1 | 1 | 1 | 2  | 0 | 0 |
| 3 | 1 | 1 | 1 | 4  | 0 | 0 |
| 1 | 1 | 1 | 1 | 3  | 0 | 0 |
| 3 | 1 | 1 | 2 | 3  | 0 | 0 |
| 1 | 1 | 1 | 2 | 31 | 0 | 1 |
| 2 | 1 | 1 | 2 | 3  | 0 | 0 |

|   |   |   |   |    |   |   |
|---|---|---|---|----|---|---|
| 3 | 1 | 1 | 1 | 0  | 0 | 0 |
| 3 | 1 | 1 | 2 | 1  | 0 | 0 |
| 3 | 1 | 1 | 2 | 3  | 0 | 0 |
| 3 | 1 | 1 | 2 | 2  | 0 | 0 |
| 3 | 1 | 1 | 1 | 3  | 0 | 0 |
| 3 | 1 | 1 | 1 | 3  | 0 | 0 |
| 1 | 1 | 1 | 2 | 4  | 0 | 0 |
| 3 | 1 | 1 | 2 | 3  | 0 | 0 |
| 3 | 1 | 1 | 2 | 3  | 0 | 0 |
| 3 | 1 | 1 | 2 | 2  | 0 | 0 |
| 3 | 2 |   |   |    | 1 |   |
| 3 | 1 | 1 | 2 | 3  | 0 | 0 |
| 3 | 1 | 1 | 2 | 3  | 0 | 0 |
| 3 | 1 | 1 | 2 | 1  | 0 | 0 |
| 3 | 1 | 1 | 2 | 6  | 0 | 0 |
| 3 | 1 | 1 | 1 | 2  | 0 | 0 |
| 3 | 1 | 1 | 2 | 3  | 0 | 0 |
| 3 | 1 | 1 | 1 | 1  | 0 | 0 |
| 3 | 1 | 1 | 2 | 1  | 0 | 0 |
| 1 | 1 |   |   |    | 1 |   |
| 3 | 1 | 1 | 1 | 0  | 0 | 0 |
| 3 | 1 | 1 | 2 | 4  | 0 | 0 |
| 3 | 1 | 1 | 1 | 3  | 0 | 0 |
| 3 | 1 | 1 | 2 | 0  | 0 | 0 |
| 3 | 1 | 1 | 2 | 2  | 0 | 0 |
| 3 | 1 |   |   |    | 1 |   |
| 3 | 1 |   |   |    | 1 |   |
| 3 | 1 | 1 | 1 | 3  | 0 | 0 |
| 3 | 1 | 1 | 2 | 0  | 0 | 0 |
| 3 | 1 | 1 | 1 | 2  | 0 | 0 |
| 3 | 1 | 1 | 1 | 0  | 0 | 0 |
| 3 | 1 | 1 | 2 | 5  | 0 | 0 |
| 3 | 1 | 1 | 1 | 0  | 0 | 0 |
| 3 | 1 | 1 | 2 | 2  | 0 | 0 |
| 3 | 1 | 1 | 2 | 0  | 0 | 0 |
| 3 | 1 | 1 | 2 | 10 | 0 | 1 |
| 3 | 1 | 1 | 2 | 3  | 0 | 0 |
| 3 | 1 | 1 | 2 | 18 | 0 | 1 |
| 3 | 1 | 1 | 2 | 5  | 0 | 0 |
| 3 | 1 | 1 | 2 | 2  | 0 | 0 |
| 3 | 1 | 1 | 2 | 6  | 0 | 0 |
| 3 | 1 |   |   |    | 1 |   |
| 1 | 1 | 1 | 1 | 2  | 0 | 0 |
| 3 | 1 | 1 | 1 | 2  | 0 | 0 |
| 3 | 1 | 1 | 2 | 0  | 0 | 0 |
| 1 | 1 | 1 | 1 | 39 | 0 | 1 |
| 1 | 1 | 1 | 1 | 2  | 0 | 0 |
| 3 | 1 |   |   |    | 1 |   |
| 3 | 1 | 1 | 1 | 96 | 0 | 1 |
| 1 | 2 | 1 | 3 | 0  | 0 | 0 |
| 3 | 1 | 1 | 2 | 2  | 0 | 0 |
| 3 | 1 | 1 | 1 | 4  | 0 | 0 |
| 3 | 1 | 1 | 1 | 3  | 0 | 0 |
| 3 | 1 | 1 | 1 | 3  | 0 | 0 |

|   |   |   |   |     |   |   |
|---|---|---|---|-----|---|---|
| 3 | 1 | 2 | 1 | 1   | 0 | 0 |
| 3 | 2 | 1 | 3 | 0   | 0 | 0 |
| 3 | 1 | 1 | 2 | 3   | 0 | 0 |
| 3 | 1 | 1 | 2 | 2   | 0 | 0 |
| 3 | 1 | 1 | 1 | 2   | 0 | 0 |
| 3 | 1 | 1 | 2 | 3   | 0 | 0 |
| 1 | 1 |   |   |     | 1 |   |
| 3 | 1 | 1 | 2 | 5   | 0 | 0 |
| 3 | 1 | 1 | 2 | 0   | 0 | 0 |
| 3 | 1 | 1 | 2 | 3   | 0 | 0 |
| 3 | 1 | 1 | 2 | 2   | 0 | 0 |
| 3 | 1 | 1 | 2 | 3   | 0 | 0 |
| 3 | 1 | 1 | 1 | 1   | 0 | 0 |
| 3 | 1 | 1 | 1 | 0   | 0 | 0 |
| 3 | 1 | 1 | 2 | 0   | 0 | 0 |
| 3 | 1 | 2 | 1 | 107 | 0 | 1 |
| 3 | 1 | 2 | 1 | 108 | 0 | 1 |
| 3 | 1 | 1 | 2 | 3   | 0 | 0 |
| 3 | 1 | 1 | 1 | 1   | 0 | 0 |
| 3 | 1 | 1 | 2 | 23  | 0 | 1 |
| 3 | 1 | 1 | 2 | 0   | 0 | 0 |
| 3 | 1 | 1 | 1 | 1   | 0 | 0 |
| 3 | 1 | 1 | 2 | 0   | 0 | 0 |
| 3 | 1 | 1 | 2 | 2   | 0 | 0 |
| 3 | 1 | 1 | 2 | 56  | 0 | 1 |
| 3 | 1 | 1 | 2 | 0   | 0 | 0 |
| 3 | 1 | 1 | 1 | 4   | 0 | 0 |
| 2 | 1 | 1 | 1 | 3   | 0 | 0 |
| 3 | 1 | 1 | 2 | 1   | 0 | 0 |
| 3 | 1 | 1 | 2 | 0   | 0 | 0 |
| 3 | 1 | 1 | 2 | 3   | 0 | 0 |
| 3 | 1 | 1 | 1 | 2   | 0 | 0 |
| 3 | 1 | 1 | 2 | 3   | 0 | 0 |
| 3 | 2 | 2 | 3 | 29  | 0 | 1 |
| 3 | 1 | 1 | 2 | 2   | 0 | 0 |
| 3 | 1 | 1 | 1 | 3   | 0 | 0 |
| 1 | 1 | 2 | 1 | 2   | 0 | 0 |
| 3 | 1 | 1 | 2 | 3   | 0 | 0 |
| 1 | 1 | 1 | 2 | 2   | 0 | 0 |
| 3 | 1 | 1 | 2 | 12  | 0 | 1 |
| 3 | 1 | 1 | 2 | 4   | 0 | 0 |
| 3 | 1 | 1 | 1 | 3   | 0 | 0 |
| 3 | 1 | 1 | 1 | 3   | 0 | 0 |
| 3 | 1 | 1 | 1 | 0   | 0 | 0 |
| 3 | 1 | 1 | 1 | 2   | 0 | 0 |
| 3 | 1 | 1 | 2 | 0   | 0 | 0 |
| 3 | 1 | 1 | 2 | 0   | 0 | 0 |
| 3 | 1 | 1 | 1 | 2   | 0 | 0 |
| 3 | 1 | 1 | 2 | 1   | 0 | 0 |
| 3 | 1 | 1 | 1 | 2   | 0 | 0 |
| 3 | 1 | 1 | 1 | 2   | 0 | 0 |
| 3 | 1 | 1 | 2 | 5   | 0 | 0 |
| 1 | 1 | 1 | 2 | 16  | 0 | 1 |
| 3 | 1 | 1 | 2 | 3   | 0 | 0 |

|   |   |   |   |    |   |   |
|---|---|---|---|----|---|---|
| 3 | 1 | 1 | 1 | 6  | 0 | 0 |
| 3 | 1 | 1 | 2 | 5  | 0 | 0 |
| 3 | 1 | 1 | 2 | 4  | 0 | 0 |
| 3 | 1 | 1 | 2 | 3  | 0 | 0 |
| 3 | 1 | 1 | 1 | 2  | 0 | 0 |
| 3 | 1 |   |   |    | 1 |   |
| 3 | 1 | 1 | 2 | 55 | 0 | 1 |
| 3 | 1 | 1 | 1 | 1  | 0 | 0 |
| 3 | 1 | 1 | 2 | 3  | 0 | 0 |
| 3 | 1 | 1 | 2 | 3  | 0 | 0 |
| 3 | 1 | 1 | 2 | 3  | 0 | 0 |
| 3 | 1 | 1 | 1 | 2  | 0 | 0 |
| 3 | 1 | 1 | 1 | 0  | 0 | 0 |
| 1 | 1 | 1 | 2 | 3  | 0 | 0 |
| 2 | 1 |   |   |    | 1 |   |
| 3 | 1 | 1 | 1 | 3  | 0 | 0 |
| 3 | 1 | 1 | 2 | 5  | 0 | 0 |
| 3 | 1 | 1 | 2 | 3  | 0 | 0 |
| 3 | 2 | 1 | 3 | 3  | 0 | 0 |
| 1 | 1 |   |   |    | 1 |   |
| 3 | 2 |   |   |    | 1 |   |
| 3 | 1 | 1 | 2 | 3  | 0 | 0 |
| 1 | 1 | 1 | 1 | 6  | 0 | 0 |
| 3 | 1 | 1 | 2 | 3  | 0 | 0 |
| 3 | 1 | 1 | 1 | 3  | 0 | 0 |
| 3 | 1 | 1 | 2 | 6  | 0 | 0 |
| 1 | 1 | 1 | 1 | 1  | 0 | 0 |
| 3 | 1 | 1 | 1 | 3  | 0 | 0 |
| 3 | 1 | 1 | 2 | 1  | 0 | 0 |
| 3 | 1 | 1 | 1 | 5  | 0 | 0 |
| 3 | 1 | 1 | 2 | 7  | 0 | 0 |
| 3 | 1 | 1 | 1 | 2  | 0 | 0 |
| 3 | 1 | 1 | 2 | 0  | 0 | 0 |
| 3 | 1 | 1 | 1 | 4  | 0 | 0 |
| 3 | 1 | 1 | 2 | 1  | 0 | 0 |
| 3 | 1 | 1 | 2 | 0  | 0 | 0 |
| 3 | 1 | 1 | 1 | 0  | 0 | 0 |
| 3 | 1 | 1 | 1 | 3  | 0 | 0 |
| 3 | 1 | 1 | 2 | 2  | 0 | 0 |
| 3 | 1 | 1 | 2 | 0  | 0 | 0 |
| 3 | 1 | 1 | 2 | 4  | 0 | 0 |
| 3 | 1 | 1 | 2 | 2  | 0 | 0 |
| 3 | 1 | 1 | 2 | 2  | 0 | 0 |
| 3 | 1 | 2 | 1 | 2  | 0 | 0 |
| 1 | 1 | 1 | 2 | 0  | 0 | 0 |
| 3 | 1 | 1 | 2 | 0  | 0 | 0 |
| 3 | 1 | 1 | 2 | 0  | 0 | 0 |
| 3 | 1 | 1 | 2 | 1  | 0 | 0 |
| 1 | 1 |   |   |    | 1 |   |
| 3 | 1 | 1 | 2 | 0  | 0 | 0 |
| 3 | 1 | 1 | 1 | 4  | 0 | 0 |
| 3 | 1 | 1 | 2 | 1  | 0 | 0 |
| 2 | 1 | 1 | 2 | 3  | 0 | 0 |
| 3 | 1 | 1 | 2 | 40 | 0 | 1 |

|   |   |   |   |     |   |   |
|---|---|---|---|-----|---|---|
| 3 | 1 |   |   |     | 1 |   |
| 3 | 1 | 1 | 2 | 3   | 0 | 0 |
| 2 | 1 | 1 | 2 | 2   | 0 | 0 |
| 1 | 1 | 1 | 2 | 166 | 0 | 1 |
| 3 | 1 | 1 | 1 | 0   | 0 | 0 |
| 3 | 1 | 1 | 1 | 4   | 0 | 0 |
| 3 | 1 | 1 | 2 | 3   | 0 | 0 |
| 2 | 1 | 1 | 1 | 2   | 0 | 0 |
| 1 | 1 | 1 | 2 | 2   | 0 | 0 |
| 1 | 1 | 1 | 2 | 3   | 0 | 0 |
| 2 | 1 |   |   |     | 1 |   |
| 1 | 1 | 1 | 2 | 2   | 0 | 0 |
| 3 | 1 | 1 | 2 | 2   | 0 | 0 |
| 1 | 1 | 1 | 1 | 46  | 0 | 1 |
| 1 | 1 |   |   |     | 1 |   |
| 1 | 1 | 2 | 1 | 2   | 0 | 0 |
| 2 | 1 |   |   |     | 1 |   |
| 3 | 1 | 1 | 2 | 26  | 0 | 1 |
| 3 | 1 | 1 | 1 | 2   | 0 | 0 |
| 3 | 1 | 1 | 1 | 1   | 0 | 0 |
| 2 | 1 | 1 | 2 | 7   | 0 | 0 |
| 3 | 1 | 1 | 2 | 1   | 0 | 0 |
| 3 | 1 | 1 | 2 | 3   | 0 | 0 |
| 3 | 1 | 1 | 2 | 2   | 0 | 0 |
| 3 | 1 | 1 | 2 | 1   | 0 | 0 |
| 3 | 1 | 1 | 2 | 2   | 0 | 0 |
| 3 | 1 | 1 | 2 | 3   | 0 | 0 |
| 1 | 1 | 1 | 2 | 3   | 0 | 0 |
| 3 | 1 | 1 | 2 | 2   | 0 | 0 |
| 1 | 1 | 1 | 2 | 5   | 0 | 0 |
| 1 | 1 | 1 | 2 | 4   | 0 | 0 |
| 1 | 1 | 1 | 2 | 0   | 0 | 0 |
| 3 | 1 | 1 | 2 | 3   | 0 | 0 |
| 3 | 1 | 1 | 2 | 2   | 0 | 0 |
| 3 | 1 | 1 | 1 | 0   | 0 | 0 |
| 3 | 1 |   |   |     | 1 |   |
| 3 | 1 | 1 | 1 | 1   | 0 | 0 |
| 3 | 1 | 1 | 2 | 0   | 0 | 0 |
| 1 | 1 | 1 | 2 | 3   | 0 | 0 |
| 3 | 1 | 1 | 1 | 3   | 0 | 0 |
| 3 | 1 | 1 | 2 | 3   | 0 | 0 |
| 3 | 1 | 1 | 2 | 2   | 0 | 0 |
| 3 | 1 | 1 | 1 | 1   | 0 | 0 |
| 1 | 1 | 1 | 1 | 13  | 0 | 1 |
| 3 | 1 | 1 | 1 | 16  | 0 | 1 |
| 1 | 1 | 1 | 1 | 2   | 0 | 0 |
| 3 | 1 | 1 | 2 | 3   | 0 | 0 |
| 3 | 1 | 1 | 2 | 5   | 0 | 0 |
| 3 | 1 | 1 | 2 | 3   | 0 | 0 |
| 3 | 1 | 1 | 2 | 0   | 0 | 0 |
| 3 | 1 | 1 | 1 | 0   | 0 | 0 |
| 3 | 1 | 1 | 2 | 2   | 0 | 0 |
| 3 | 1 | 1 | 1 | 3   | 0 | 0 |
| 3 | 1 | 1 | 2 | 2   | 0 | 0 |



|   |   |   |   |     |   |   |
|---|---|---|---|-----|---|---|
| 3 | 1 | 1 | 2 | 2   | 0 | 0 |
| 3 | 1 | 1 | 1 | 0   | 0 | 0 |
| 3 | 1 | 2 | 1 | 72  | 0 | 1 |
| 3 | 1 | 1 | 2 | 14  | 0 | 1 |
| 1 | 1 | 1 | 1 | 2   | 0 | 0 |
| 3 | 1 | 1 | 2 | 4   | 0 | 0 |
| 3 | 1 | 1 | 1 | 1   | 0 | 0 |
| 3 | 1 | 2 | 2 | 14  | 0 | 1 |
| 1 | 1 |   |   |     | 1 |   |
| 3 | 1 | 1 | 2 | 1   | 0 | 0 |
| 3 | 1 | 1 | 1 | 0   | 0 | 0 |
| 3 | 1 | 1 | 2 | 29  | 0 | 1 |
| 3 | 1 | 1 | 2 | 1   | 0 | 0 |
| 3 | 1 | 1 | 2 | 8   | 0 | 1 |
| 3 | 1 | 1 | 1 | 4   | 0 | 0 |
| 3 | 1 | 1 | 2 | 3   | 0 | 0 |
| 3 | 1 | 1 | 2 | 6   | 0 | 0 |
| 3 | 1 | 1 | 1 | 3   | 0 | 0 |
| 2 | 1 | 1 | 2 | 2   | 0 | 0 |
| 3 | 1 | 1 | 2 | 2   | 0 | 0 |
| 1 | 1 | 2 | 1 | 1   | 0 | 0 |
| 3 | 1 | 1 | 2 | 2   | 0 | 0 |
| 3 | 1 | 1 | 2 | 50  | 0 | 1 |
| 3 | 1 | 1 | 2 | 0   | 0 | 0 |
| 2 | 1 | 1 | 2 | 1   | 0 | 0 |
| 3 | 1 | 1 | 2 | 3   | 0 | 0 |
| 3 | 1 | 1 | 2 | 2   | 0 | 0 |
| 3 | 1 | 1 | 1 | 2   | 0 | 0 |
| 3 | 1 | 1 | 2 | 2   | 0 | 0 |
| 3 | 1 | 1 | 2 | 0   | 0 | 0 |
| 3 | 1 | 1 | 2 | 4   | 0 | 0 |
| 2 | 1 | 1 | 1 | 5   | 0 | 0 |
| 1 | 1 | 1 | 2 | 70  | 0 | 1 |
| 1 | 1 | 1 | 1 | 0   | 0 | 0 |
| 3 | 1 | 1 | 2 | 30  | 0 | 1 |
| 1 | 1 | 1 | 2 | 0   | 0 | 0 |
| 3 | 2 |   |   |     | 1 |   |
| 3 | 1 | 1 | 1 | 4   | 0 | 0 |
| 3 | 1 | 1 | 1 | 1   | 0 | 0 |
| 3 | 2 | 1 | 3 | 0   | 0 | 0 |
| 2 | 1 | 1 | 2 | 2   | 0 | 0 |
| 3 | 1 | 2 | 2 | 313 | 1 |   |
| 2 | 1 |   |   |     | 1 |   |
| 3 | 1 | 1 | 1 | 2   | 0 | 0 |
| 3 | 1 | 1 | 2 | 6   | 0 | 0 |
| 1 | 1 | 1 | 1 | 2   | 0 | 0 |
| 3 | 1 | 1 | 1 | 4   | 0 | 0 |
| 3 | 1 | 1 | 1 | 3   | 0 | 0 |
| 3 | 2 | 1 | 3 | 15  | 0 | 1 |
| 3 | 1 | 1 | 2 | 0   | 0 | 0 |
| 3 | 1 |   |   |     | 1 |   |
| 2 | 2 |   |   |     | 1 |   |
| 3 | 1 | 1 | 2 | 56  | 0 | 1 |
| 3 | 1 | 1 | 1 | 5   | 0 | 0 |

|   |   |   |   |     |   |   |
|---|---|---|---|-----|---|---|
| 3 | 1 | 1 | 1 | 3   | 0 | 0 |
| 3 | 1 | 1 | 2 | 129 | 0 | 1 |
| 3 | 1 | 1 | 2 | 169 | 0 | 1 |
| 3 | 1 | 1 | 2 | 3   | 0 | 0 |
| 3 | 1 | 1 | 1 | 3   | 0 | 0 |
| 3 | 1 | 1 | 2 | 0   | 0 | 0 |
| 3 | 1 | 1 | 1 | 4   | 0 | 0 |
| 1 | 1 | 1 | 2 | 9   | 0 | 1 |
| 1 | 1 | 2 | 2 | 11  | 0 | 1 |
| 1 | 1 | 1 | 2 | 2   | 0 | 0 |
| 1 | 1 | 1 | 2 | 2   | 0 | 0 |
| 1 | 1 | 1 | 1 | 3   | 0 | 0 |
| 3 | 1 | 1 | 2 | 171 | 0 | 1 |
| 2 | 1 | 1 | 2 | 297 | 1 |   |
| 1 | 1 | 1 | 2 | 309 | 1 |   |
| 3 | 2 | 1 | 3 | 223 | 1 |   |
| 3 | 1 | 1 | 1 | 366 | 1 |   |
| 3 | 1 | 1 | 1 | 547 | 1 |   |
| 2 | 1 | 1 | 2 | 194 | 1 |   |
| 3 | 1 | 2 | 1 | 267 | 1 |   |
| 3 | 1 | 2 | 2 | 406 | 1 |   |
| 3 | 1 | 1 | 2 | 15  | 0 | 1 |
| 3 | 1 | 1 | 2 | 31  | 0 | 1 |
