# Supplementary material
Source: HighWire-hosted journal article supplement (https://bmjopen.bmj.com/content/9/1/e021529)

S2 Figure. Histogram depicting the proportion reported after diagnosis of TB in nine counties of China, 2015

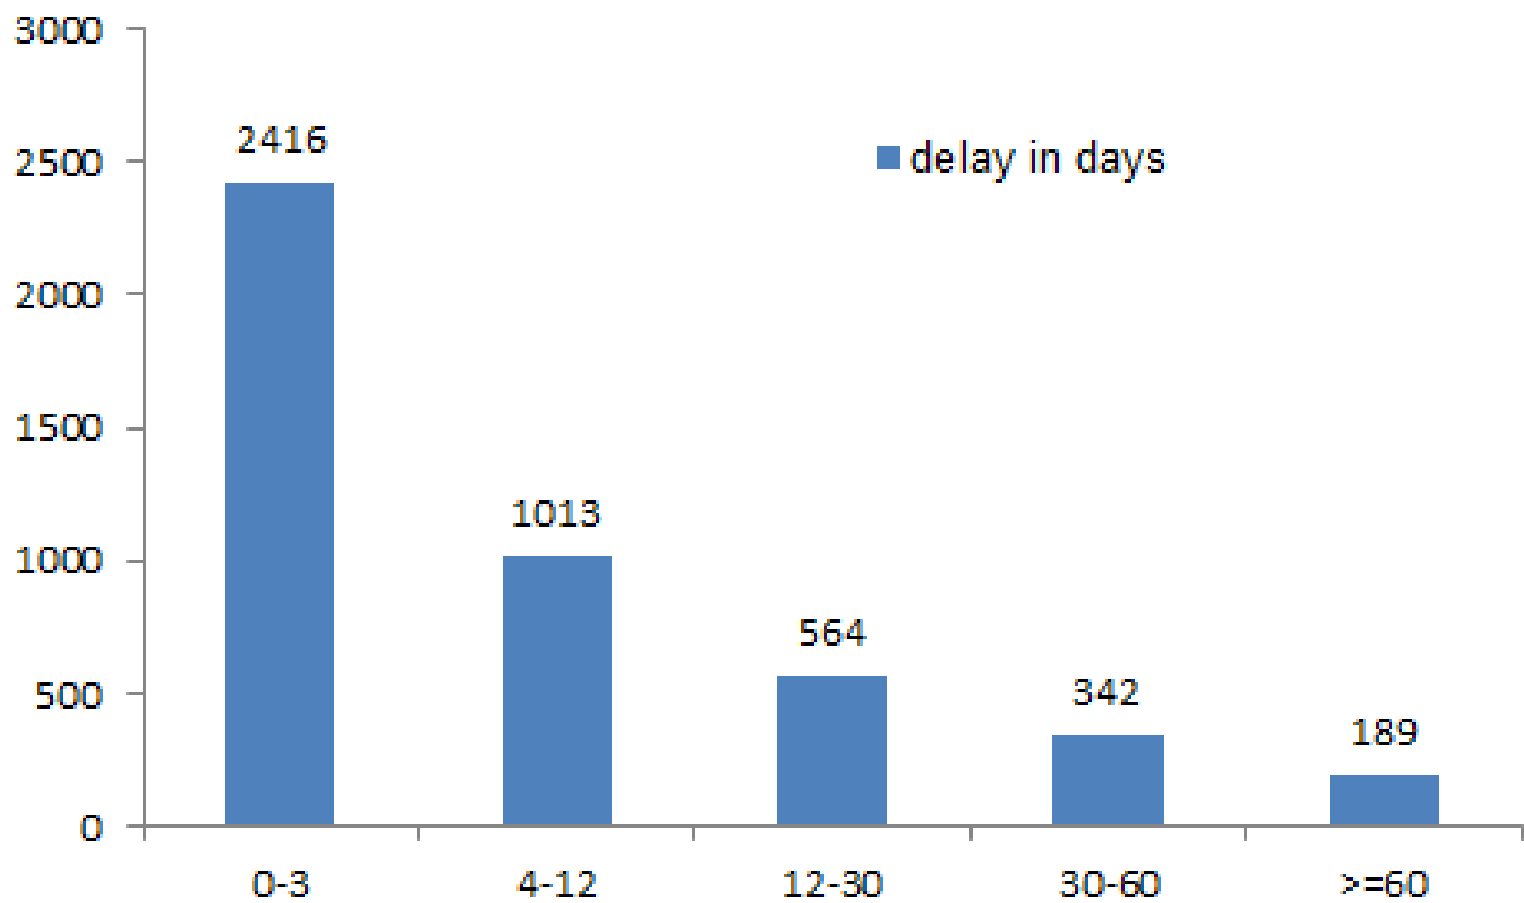

Supplement: inline-supplementary-material-2 [file inline-supplementary-material-2.pdf]
